# Supplementary material
Source: publisher figshare collection journal article supplement (https://gsajournals.figshare.com/articles/dataset/_/12637415)
Supplement: Supplementary file 1 [file 1]

## Sheet: All Proteins
>Alen_Al4_ctg01_-_Alen_Al4_ctg01g1t1	MPTGDKLIEIKYSDAVHKFSNWWIEFNPSTQVLPKGWSRDPDRRALKEEIIWHKDVAIPLRDGIVIRGDVFLPAKSEGKSLPALLPWSPYGKTGAGPQQTTEFEFLGVPKSALSGLEKFEAPDPAEWCPRGYAIVNVDARGAYMSEGNISFYGREEGKDGYDTVEWIAAQDWCNGAVALVGNSWLGTSQWFTAAEKPPHLKAIAPWEGFGDFYRETICRGGIPNSKFWSILGSGLEGQNSREDVEQMLAQFPLMNEYWEDKKPRIQAIDIPMYALASYSSCLHTEGSVRGWKYSSSREKWLRIHHSQEWFDIYSPDAIDDLQRFLDHYLLDKDNGWENTPKVRISLLRYNAPPITSRPEDNYPPSRTVYETFYLDGKTSQLSKSVSPEESVVSYQSDSW…
>Alen_Al4_ctg01_-_Alen_Al4_ctg01g2t1	MLKHGDQGYMEENKGRALYSITFSFLAAAIFVVILRLSSRWCLLRARRTSLSETLIIAAVLVDVASCVLIHFQIHTGMGKHIEYSRARPAMLIKSMKIGLAQNTSYQALIGLIKLSILVQFYQLALPGSQKRVIVWVGVFVLVFTLFTVFAAIFQCVPMHAAWDLENFPKGCWNMMVVNFITSSVNTLLDVVIFVLPIPTMQKLQIAFKKKVTLVFAYAMGLVALACSIIRLRNIIHFNGEGDFTYVASMVPVWGAVECNAGIICASLPFVVPLFKWISGSAVESATGTSRRAHELQRSDKMSWPLNSRRQVDWHRMESESTENIRVNSGTTVVLSHATARSNEKHVEHC
>Alen_Al4_ctg01_-_Alen_Al4_ctg01g3t1	MTHDIRKSGIPVLAYAPFDVSPVSFSLIFRFNEGRATASLLLQSTLSIDGHDEKHAFILQVDADNLKPGKNSIGPATIPLPQWRLAQVSRQGNPQIRTLSLTLKKVCPVWCSTFPGPLRPKPDHEAAFTRLANLAKATKLHILFDYNWLHRDHHNIFRSLVDRPEQLTGFPVSRHYSKQYRREDWSVFNAGNAGEDATTEDEAPAEEAPPVYTKSSKRPRNVTPTPSPPPKRVLLSPYPDTHTSPTEKDSVATPSPKPPFSSATTPNLRFPLLTALPSALPQPIAASPQHPPSYTNLDDTSQKPASFAASSPGKPLSHGHTDIQRVIEQAAATILPSMLETLIPSLLPRLLTASSPSPTPSLQSMASRTSTSPPPPILSALGVSLGEHVTHRIEHELSS…
>Alen_Al4_ctg01_-_Alen_Al4_ctg01g4t1	MTCSLPVGSALDAIGNTPCVQLRRVVPSGCARVFVKLESLNPTGSYKDRMAKSLIEEAERKGDLRPGMTVVEATGGSTGSSLAFVCAVKGYNFHVVSSNAYADDKLRTMAAFGANTVDLVHSPSGGITADLVPSMIKRAKEISQSDTHFNTDQFVNSDAFVGYRTLGIELLDQIPNGIDGFCSAVGTAGMAMGVSKVLKERWPKTHVQILEPVSSPFLTTGRGGVHRVEGIGIGYTPPLLDSALYDEVRAISEDEGRAMCRRLAREEGILAGTSIGLNVTAAVALAKQLGPDKTVVTVACDTGLKYMHRDLYSEPQVDAQS
>Alen_Al4_ctg01_-_Alen_Al4_ctg01g5t1	MSFLTRYGSILLGLLMLPNIKPSGAVATKKPRADTPVRERISLNADWRFQRFVENPDGLSYDALKPWILPVANDFLSGSKYERPSEPGPGSNVTYVQPTFDDGAWEAVNLPHDWAAGGDFDFSPEVEGGTGRLPINGIGWYRRSLHLDASTVETGKSMFLDVDGAMAYATVWLNGRLVGGWPYGYNSFRLDLTPYAQAGDNLLALRVDNAPDSSRWYPGAGIYRNTWLVMVNPVHVGQYGTYLTTPEISSEQAAIDLRVEVQNKVNTSQTVQIATEIFELDSSSRKASGDAVARIPAATVSISGGSKQSVNGSTTVANPKLWGPLPKQKPNEYIAITTVSSNGTAIDVYETLFGIRSITYDPNQGILINGLHVPVYGTCNHHDLGSLGAAFNYRAAERQ…
>Alen_Al4_ctg01_-_Alen_Al4_ctg01g6t1	MLRLVLTSVVVAAVNAKCYEPTFAHPLPEYDASDALLKHAFAELNTAITSAVAAPEFAASSFSIEITSSTETLWSKHHTARERNASRPDIPEVNGDALYRIASITKTFTVLGILHQEKAGNLSLDDPIDKYIVELKEDHKGTLPWKDITLRSLASQLSGIPREWAQGDMINFDKWGIEDPVNWGLPPISRGGLSTCGEYSPDYKKICAEGDLLDSLKSKIPIFAPNQQSTYSNVAFELLGMVIERVTGQSYQSYIEQAVFQPLNMSKSTLSLPPDAAGVIPLGPQYWDIDEGIQSPTGGIYSSSTDLSKYLRYVLTHFNGLTHALNWLNPASPARGINSFYGIPWEIFHTDRALQDSRRTVRFITKGGGLPGYTSVIIMAPEYDLGITILVAGNSDLLA…
>Alen_Al4_ctg01_-_Alen_Al4_ctg01g7t1	MDYSSVAPPARSELGGQDLHAIGMIELLEHDPRPTFVLNGTILNQNCNIATSLAYWNLSLASINEGDLLVGIKDDSAIITAEKHSQIRSEFRAWIATDVETTKSCVFLGYTWTKLVLASHWIVVFGAPTNTSPHEGDAQLEHATLTRTLSGSSIATFDWTDELPPARMSSHVAWARSIDWSQTPLGPTSNWPHQLRSISNIIMQDSRPAVVFYGPELTMIYNEAYTDCLGNLHPCMGSSAQTALATVWSDFLAPIIAQNRDGEVVEQTDTLVNISRNGFLEETYFNVKFMPMLDSSGATVGHYVSASESSRGVVSERQSQTLLHLSEELSHARDIDSYWNTATEVFSRNDKDVLFLLLYSVEYDPSESITSATPMSREHRQCKLRGSVGLPEDKLAGPA…
>Alen_Al4_ctg01_-_Alen_Al4_ctg01g8t1	MLKATLEAQPELNMSLSASSSTTGFFQALPSLPPQYTSPDSSPTTSHKDSHSNAGDIVFARILDLYTPSQNATITSHLHRIARIALDPQVLSYATDAETNHPVLRALTTFGQENCNDPLWTTSGWQRLKEIGYAEGVVAVAYSQSPETTHINRRIYEFGLNHLWSVTGTMTGCPMSMTDGAATLLSKHLKDPDGEQIGRLRVFEEAYRRLTSRDSKYAWTSGQWMTERTGGSDVSGTETLATRISPEELARDEEDGRSEDAVGMPLGPWKIGGFKWFSSATDSEMAILLARTKKGLSAFYMPMRRKGTPVANIVSLEAPAETELNGIRIQRLKSKLGTKSLPTAELELRGARAWLIGTEGRGVAEISAVLNITRLSTAAGSVASWSRGLAISRAYSKVR…
>Alen_Al4_ctg01_-_Alen_Al4_ctg01g9t1	MTISTTFVLGSKEAYFFNSPTHWAWHNLPPDIEALFTKTPPIRDVIELTLGGNQTYFVSYRDHDGQILCKHYNLPNPLVEYLYASHPAVIRDLSTLSISLGPYESYYAWDRTSASWSNVPPGLEKSLLNRVESHDAWRTTWKADGYEAPCFVSLGNDGAYFLRTVSGGGGWDFKLPKVEGRSGLGVMGGDGWDGIRGTNQFLEQSSDFTAIAVGFKFLVLNLKTDFRQAVHLMPSQANAYVLVLTDGKTFSNLPEHTWADYAKMADSLPSFVQHSAPLPPMPAPQIPTQPRPQPQPPGYAQSQRRQPGNCCPSAETGMNPLHTCCPPAPMARPWPMPPINSLLQR
>Alen_Al4_ctg01_-_Alen_Al4_ctg01g10t1	MFLGLSIYSKLELMRGAGDRIRSSGPPPTSQDRATSRQTHDTFTPSSTTPFTTTTTTTKHRRPRFLPAAPIPPSDSIDAWLECLTRASAASHPGHSARCTMGDAEDDDAPTKPLPAPNPDAQTTVNDFLDYTDFYPSDLVRSLTLIGDLDATYAEAVQQVHELTSLYCTLPALPESERPDPAALRKQIARRLQTAMSQREYAYSEAARLYEVTLRHCQRSTVIKRKLQAQPEPPSRDPTPPPVSPQALKRTYDRPRLHLTLDGARPKHRNSAMALPRARSPAHSDSDSDESDAARRTDVAVRSRKAQTYKDRAPRPRPRAPGVAGTNVHSSIAGISTSNALAKLSPPPPEARPGSKWAPWMKLTEYEMAVLRKQMKKNAVWTPSLTMVNRELERKHRTR…
>Alen_Al4_ctg01_-_Alen_Al4_ctg01g11t1	MASAARLARLRELTEADIESLPTRAPEPVFDDSDVSGGVQLEPLIEEPSKQTAANTSQPPPHPITVEADTDRRFIWLKDAESSYKPGPSLKPSIVTIAPKPSAPLPTTYLKRGDLCPAQHHFVPIQALVKYPYKFCNKIHSQDIASAFFDQGKFWTRTWDLYYVWDIDNLSKPLILVHETQFQDLLNEINNHLKLSLYITDEQREDALVSRFPDHPRCTPRYLGRSTSREDYDNMVDNAPEHSFRAVGEPDGPPPDERTLEAFKQLMEDSFEAQKAKNKAAKAKRQQERLVKQRVMADQFKRTQRYLGLRPSPAVDNAAPNGLPPAVDPTLPVPFDFDQSVVFVCVDVESYERAHHKITEVGIATLDTRELASVSPGYDGANWRALIRARHFRIKEYAH…
>Alen_Al4_ctg01_-_Alen_Al4_ctg01g12t1	MSPDGPMTTQRRPRRTTPPLHGDDASHARTRDGKSKSRDAWWKTRLFSGMVNDVKRRVPFYWSDYADAWDYRVVPATVYMYFANILPALAFSLDMFVKTDMSFGVNEVLLSSVLGSVVFSLAAAQPLVIVGVTGPITVFNYTVYDIITPRGTNYFAFMCWIGIWALIFHWILAITNSCNGLRYVTRFSCDIFGFYVAFIYLQKGIQVLTRQWEVSDASAYLSIMIALLVTAVAYLCGVIGQSSLFPRHVRKFVEDYGTPLTVIFFTGFVHIGKMEGIELLKLPTSKSFFPTTDRGWFIHFWDISVGDVFLAIPFAILLTILFWFDHNVSSLIAQGTEFPLRKPAGFHWDIFLLGLTTGVAGLLGIPFPNGLIPQAPFHTTSLCVTHTETDEKGNTRRTT…
>Alen_Al4_ctg01_-_Alen_Al4_ctg01g13t1	MDGVGAQALLRNKLGKESGESATAELAKDLEYMPLAIVQAVAYIRQRASRCSVQQYLAEFHKSDQKKTSLLEYDGGRFRRDADAKNAILLTWRVSFDHIRQVRPSAADMLSLMSFFDRQGFPAELLRDRYWTESYSNDAETISPEGEGSDSGTSDSEESIDDGFEDDILMLRSYSIIALTTDGTAFDMHRLVQLATRRWLEEQGQLEMWKERYIDRICAAFPKEFYKDWTQYQALYPHAKLALSQAPKSEESSKRWALLLYHAAWYALDIGNLSDAEKLSMRSLNVGKEVFGETYSDTLKSMSLVLDVLVRRGRYVEAEELVVQAVETGKRMLGDDHSSTLVSMDMLARTYENQGRWKEIEELQVQAIETKKRTLGDEHPNTLLSMISLAFAYGKQGRL…
>Alen_Al4_ctg01_-_Alen_Al4_ctg01g14t1	MRLLRRLPDNSFELISFDDDNTPPYAILSHTWAEGQEVTYLELLAGAGKDKTGYEKICFCAERAAVDGLQYCWVDTCCIDKSTTNELNTAINSMFRWYQRASK
>Alen_Al4_ctg01_-_Alen_Al4_ctg01g15t1	MLEYYWEEGIDEAGVDFLEDSDFATDYEYLLYNRWGDAANPYGQTINAFLVVEGWNVMLVLRLISIGVFLTVCIVSIATAVSHSFEIGLTAGSYAASLLSVMLAVFAFLSLII
>Alen_Al4_ctg01_-_Alen_Al4_ctg01g16t1	MSRTALFTIDIQHSLTTPPTSIPTAPRILHAATTLLSRTRHSIQTSRLQHLPPNLDLVIVQHEESPQTGCLVRGSQAWEVVFLHRESDGNEMLIAKRDRG
>Alen_Al4_ctg01_-_Alen_Al4_ctg01g17t1	MPPTARLPTAEFQSLLLPPIRIRLRTLHTFNRPQCTPIARHCARPAATCPAQRRSLHLYKTARARTALGMQKMLGFSLYEIEAPAVSNHRVNLVKSEFDHTPIAQDISLQALYDDHIAPGKMLYMTQPISKKLSENYERMRDEYIPAHTNNYAIVPAHSIEVVLKNPQTEGKQLGPLKGVHLVLANPVAYTKEAFDRAYQFIEQGSPVEFRVRLLGSVVKKRMKTARPRADAWPWMHAHFPHLRPDFILKSMPEGTEYLIKPVSDGYTVQFVLGRRAEEMPVLDLTRRVFRVKKAVAEARGMHLRGGFEEMIRRDDLKG
>Alen_Al4_ctg01_-_Alen_Al4_ctg01g18t1	MKAARQACRPKHQVLVLKCYPKYNKQNVEVRANSSELSYLLYYASTRRSKLPKVTDFLDKRATSDVWKGRTGNVQVTLQIVRALIDKCPRDLPLYHHAVLRILRTILTSSHVGMVEESVPAFATLCAHQDPATLAADVEYMRQYEDIVQLYAQYAAKEQEQHQEQTKTPRAPQTKTPRAPQSWPVALRLRKAGLHALKAVAESESLGSETGRQLALIIPVVLANLYSDSPAFLTRLEQREHDSDTHDKDLALSRKKSLSTAARTSTNDDEEGGDPVAASGTTEAADRLAEEKVGVLALQALRNIFQGVNRGQLRLATSAVLKFIAANVNGLDAPRESWATKLMATICAWAPVQDRYAILVAVVEALVRSPIVEHDVERQLLLATVIDHLLSSTINFIGL…
>Alen_Al4_ctg01_-_Alen_Al4_ctg01g19t1	MEPEALTDDQYGKSEKFLSVDQLFEFRFLSALLSFSNGLEEAKGATNEPNDDARYRILFETLTHLVNLFVRHSEVAAVTVSDKTGALLRATYQDLGSDHDDLENDIARVATEPSDRNAEASLSVSRNFKRDFDQGNLKLYPDDKTYHKKHPPLEVTLEDTIADKNLGDVTMAQWILSRTERTVEFSKYPTTDVSFAEHCANVVKLIKDTHSATDITMARDKLRNYVLLSSCAKIHGRLVRGVDERNLFEFVVTSSTTLATKMGSNNMFILLGTAGYAEALRSFTSEERATTLRLCKFLKSHLESMPPENQTKEAKDDTKYISIFQTHLEDEAREISYNVEIMTYLQVLISNIVHNVNKAINNLVRFKRKAQIHRVEYFDQWPIGPKGEDDASFQTNITS…
>Alen_Al4_ctg01_-_Alen_Al4_ctg01g20t1	MSHESVWYSRPRTYGKGSRSCVVTGERKHAGLIRKYGLNMSRQAFREKAAEIGFVKVWFSYEEQCVALTGFSTDKRRNVRTTVRSGRNDGMGRKRVSKIYNFITKAFRAWNGFQS
>Alen_Al4_ctg01_-_Alen_Al4_ctg01g21t1	MKTTFAMSLFIATLTAASVLPNHDLNERAANKCKMFQIFRSPNGAFGGSPNFVGTPKCCCQNAQCHVVDRVNGINTSANLNQFLAGKFRIINARGGDNGRAGANDINGATYTVAGLGPC
>Alen_Al4_ctg01_-_Alen_Al4_ctg01g22t1	MAEEEAQQPTLEPVSRPLALIPVVIKEAALDSPTFRATAVHFGDQIELIERWLDAYVRATSRLASELSTLQGIVDTYVQASHPPLQLSEAIIDHDYTVLALKRFGEGAREYWNSTCRSMKKAESSVCEPLRAFLNNDLRVLKEARKNLDTTQRTFDGAMARYAGQVKSKEASSLREDAFQLHEARRAYLQASMNFCILAPQVRLTLDKVLVKVIHEQWRDMKTAKDAPAKAFALGNADMERVRGWSKEMENGERVFKRELHLARQQIEQAAELTARPSRDLDSYAASTVAYLGNPAPSSATLPSPANPDPANEKAEKQGWLFQRTITGKPARTYWVRRWFFVKNGIFGWLTQGTRSGAVEESEKIGVLLCGIRPAFQEERRFCFDVKTKDTTILLQAET…
>Alen_Al4_ctg01_-_Alen_Al4_ctg01g23t1	MPRSASKSKRELNGDAVVENRPQKKAKLLDHTDDDDSDAETGGFQVNEEYARRFEHNKKRAEQHRLEEKYGKGRAFQNDDDDTEDSEEGVEEDDAADLLDEALDDEVMATLKALRSKDPRIYDKDAKFYTDLPDDADDDNTAADGKKEASMTLRQFHTKNLLEGNVPGDDEEDAPPRTYAQEQEDMRKSLVKEMHAAADAEDDDFLVAKPKPATSKKDRVKITHDDVIKADHDPELFLSNYMESRAWVPADKTQFQPLESDDDDADAAADDFEHAYNTYFEDTTGTNEKLTTYARDAVAATTVRRDEGNSRKKARDAARAKREAERKEREEDLARLKKLKVEEMEAKVNQIRKIGGLSGRDFKMDEWKDVLEADWSDDQWDREMSKRFGESYYNEADAA…
>Alen_Al4_ctg01_-_Alen_Al4_ctg01g24t1	MAHLLDLPPNLLFHIFGFLSKREHLTLAHTCRATSKEATPCLYRDLKFAATGTGTCARKLALLARTLLERPHLASHVVSVRLSGAQLYWNQCNPWLREGSRGANFGLWGLEDCPILSKAQLIFASNTFYHFVDDDMQQPQTQLRGRCADALVTLVLTRITSLRSLTLCEGFLRYSLFLPQLLKRTDYLFPKLRHVVLGDRSLELDTNILYMDLNLIRPVFYSSTVAEFQCSMSPPWRFHWNDARRPHNHSLTSLTLFRTNISRATLGELLSATPKLKYLFFEHEFVFNAATPHGPPLSPYLGLDELNTALFHVKNTLEECHLILRLGPGSISTTAYPLASVRFPAIQGTLTMLKFMPRLAKAEVPMIMLLGWYPDFAAKLEEVLPHGVADLTLRDDLVR…
>Alen_Al4_ctg01_-_Alen_Al4_ctg01g25t1	MATFPLLPAELVEFIASYSAQADLHALSRVNRSLSTLAMPYLYRHVDLVIPPGERMPRIDRFCFNILNDSRRAARVETLRLGPSSADGVKEGQRWLPKDKNFDDEAMYEKAMVALSDETLITNEDYLRDAIIQREYSAYATLVLLTLPTLQQLDIADFAYATMDRLHTVLRNLDAERVWNQRHASSALLMRLSCIKTVSCNFDKQTGLAYPEDKSRVNIDQVLNLPGLESLEFSLSERQAQLSRAFNPGLMAPQNRQLVSRVRSTHITRLVVRHSTSCALAVRPLLACTPQLKSFACDIAYDCHDRNEAPDGWIDLDAWNTSLNAVKPTLEVLVFAVEYFDSGKYAFEQPRIGPRLYGFLELTGFELLHTVEVPIPFLTGDVEFSITADIYPLLPPNLR…
>Alen_Al4_ctg01_-_Alen_Al4_ctg01g26t1	MHSSAFLTSALAVGALALPNPLDKRQQAAVTVTVTAFVNPYATPAWTAPQFSQTPNTRRPTNAPPLWTPPHVGASSVVANPAPARTSSVTSRPVVPTTSTRLSSSIYTPPVVAPISNRPASSSVAVPVSIRPSSSIAVPVSVPSVGAPRPSSISAPGASSSPAPSAAPSAIAADDHISGPTQASLSVGAEYQRAILYHHNAARANHGAGPLVWDDAVAQTAAQAANTCKFEHYIPAGANQGQNLFTTSGNVFNVTAGITESWYKGEFQAMLPYFGAANIPDDVFHNVGHLTQVVWKGTTKVGCVSIDCGTRMTVGGQPSNLNKYTVCNYSPPGNVFGQYAANVGSPISRTNLGSWLD
>Alen_Al4_ctg01_-_Alen_Al4_ctg01g27t1	MAAECDHFSNLPNELKYMILSLLPCHSLKVARLVDKEWAVVAASLLFHTVETRLLETENRKISTLIDGLPGGFLDSVKVLCISSVSNPPAREKTENSLLRLLGALPRDTLATFRCSVPLSQHTVGLLLRTQSRLSDLGVSLARNEQIGLPGPNFVRGNLLCLRRLAITVTRASNSTYEGYGTWFSYTPILEDLRIQGALFHGLHYFEGWTLPMKNTLLTLRRLFLDQLVLTPSVSGLSEQMHLPSLRELVLRQCRGTGALLDSFTTAFSKSENSALEMFEQADTKQLPDHVAATKLLKALKKLDVVILTNKSGLVDSLPDLTSLCEVGHTIRAAHISTSHETRYYNVDELRQLSAACPNMEMLCINLPDFHEDVINTEILDDFELSPGNGGSPARRELR…
>Alen_Al4_ctg01_-_Alen_Al4_ctg01g28t1	MTRQILPVPNPVLSYWLRDPHAYADLRSSPRLPAECDVVVVGAGLAGVLAAYHILTTTDEIDEEGDGTEAQDGVGGGFERGKTKVMLIDARQLCSGATARNGGHVKVQVKTLLNLENGEKDGGKKRTEFQDYVTRVMHELKRIAEQEELDCEFELRRSFDVFTDAQEAEDIHHRYETARKRGEGWTTNVSWIGAQMVEQVTSISGAKGAFSVPAASFWPYKFVMQLLERMVARWPHRLNIQMNTPVTRLTTTSSDTTILVTDRGSLTAAKIVLATNAYTAGLLPSFTHAVIPVRGMASHHTPKHPIHPHLANTYNIAFGPQKGVDYLNPRPDGSIVVGGGAWLFGGDMHSWRGNWDDAHLFSEEVMRYWHEYMADRFLGWGNSGAVNDSAWTGIMGRTV…
>Alen_Al4_ctg01_-_Alen_Al4_ctg01g29t1	MECMRDQLQAGVVLHGRYETISALNSGSFGMVFQAKDLVTDDLVAIKVVTKPSAAANCPSAFAVDERSEELGVHLRLGAHPNVVNLLQSFETQNHIYLVLEYCSNGDLYEAIRFDKGPLETEHVRDFMMQLVGAVEFIHSKGIYHRDIKPENIFLTQDGSMKLGDFGLATSDYWSWEIAVGSDRYMAPEQYDPTNAGYSTAKADIWAIGICLLNVLFQRNPFAVPAQSDPLYADFVLDRQSLFDVFPNMSQDTYEVIRHCLAIDPEKRDLAAVKEALARAVTFTTDDEALDEFCTEEREPFVVGANREPLRTPSISTPSLDKGGSFPWAKALAMSPPQQFRQLSVIPDTEIYSDDLFPASDYAVKPEHASVVSFVDSGLGLSFKSTDVTEHTEREPISF…
>Alen_Al4_ctg01_-_Alen_Al4_ctg01g30t1	MPAAHFDAARWTASEVVLLDIEGTISSISFVKDVMYPYALERLRRLARDSWSDSDFQVLIAGFPAETKRDADSLLAHVEDLTRRDVKAVYLKQLQGHLWKTGFTEGDLKTPLFADVVPTLTAWKDSGRTLAIFSSGSVQAQLQFFSFVEDGATTKDVKPLFSAHYDTVNAGPKLEKASYEKICHEMNVDVKKVTFLTDNVKEAEAATAAGVYAVVVDRPGNAPLSNESKGAYCVVASLSELPSLS
>Alen_Al4_ctg01_-_Alen_Al4_ctg01g31t1	MESNKRSMSITQTGAGRKASVASGSKDPSADAALAKMGYASELPRNLSMLSVLGLSFAIMAVPFGLSTTMYITLTDGQSVTILWGWVLVSLISLCIAASLAEICAVYPTAGGVYYWSAMLSTREWAPITSWVTGWLTLVGNWTVTLSINFSGGQLILSAITLWNEDFVPNQWQTVLMFWAVMLICMCVNIFGAKYLDLINKVCIYWTGSSVIIIMITLLTMADVKRDADFVFTHYDASASGWPSGWAFFVGLLQGAYVLTGYGMVAAMCEEVQFPEREVPKAIVLSVAAAGVTGVIYLIPILFVLPDVQLLLEVANGQPIGLLFKTVTGSAAGGFGLLFLILGILFFAGIGALTAASRCTYAFARDGAIPGSRIWKQVSNKYDIPLMALVLSTAVDCLL…
>Alen_Al4_ctg01_-_Alen_Al4_ctg01g32t1	MSALDILREVMSTHHDLVEDYDTDAVSVTSTDAGSIDPFYTVDCIIAENPKEERCYLVKWENWRLQHDHFQYQSHKLTSMLHPFSLRTWEPPANLDGSNLISNWEKVKRELGEAAFRRENEENIAAYGRAQENAEAARESRHEKRERKRQRLRRQSRRAIAPDDDSSDEEPLRLAHARALGGESLFVEDPGVKVSASSSVGGPRARQPLVPRTAPFQQSSSEEDSDSDAQNHGDPSSGERQKKTDRDASSQSLASTILKPERLNKSRSPSKTSKTDTGTSSRDRESKVTGEEARGAKGSAVSDKPSTQQEQATDFSGAKDRSTAVSTTTSKPAGTPGSKPNAMRAIRTAPQKQTSRAINIIDHPVEQKRKPWSTDHHYNKIKFRGLAEKRSRAERTPDF…
>Alen_Al4_ctg01_-_Alen_Al4_ctg01g33t1	MANDEYDVIVLIGDSGVGKSNLLSRFTRNEFNLDSKSTIGVEFATRSIQVDAKTIKAQIWDTAGQERYRAITSAYYRGAVGALLVYDISKHQTYENVTRWLKELRDHADSNIVIMLVGNKSDLRHLRAVPTEEAKQFASENNLSFIETSALDASNVELAFQNILTEIYRIVSSKALDQGEGSQNVLGGERKVLEISKSPDADQKKGCC
>Alen_Al4_ctg01_-_Alen_Al4_ctg01g34t1	MPPSQPPPTYSTLSTPLLSSANLTQPPAHALTTSLTATISSLQLHPTLEATLHILNHDLPSAHFLVRHMQAPPALEGMLLHSILHRSEGDMRNARLWLGDVGDACAGYVPKKRDAGTRLEGWVAEGVRGRGGGGGVAAGVCVWGGGVEAGLRIVGEVEGWRKREGGGRRGSS
>Alen_Al4_ctg01_-_Alen_Al4_ctg01g35t1	MKVLTPEQEEAHYNASVKGGTIGGLIGTAVGAAAVVGASRRYPSFRALTLPFRAFLVSSAGTFVAVIAADRASAAFDIENTPEKKAQIQRDREREALLESNKTTFERAKEWANENRYPLLFGFWVASMAGSWTLVNRNPYLSGSQKLVQARMYAQGGTLAALLTSFAIEGNDVAKGKGRWETIKVLDPNDPTHQHMIEKKIHHERYAGEDQWREMVEAEEERMKERNAHIEAKRQHPENKKKQDEAQKEKKEEKDKSGAKA
>Alen_Al4_ctg01_-_Alen_Al4_ctg01g36t1	MAFNITSDGSPTPRKGPARFSMPSGDLRVDTSPEVLGQINGNSQNYYPFGHYSSFGSSLTSNLQGLKRPLGSSAMGNATIPSVQQQQQQFGSFKTQGDHHQDPSVMDSLLRRLNERSSPEDPYKSSSSSSVPITPATEAYMSMPPTTTSADSSVLVGVAELQKIRTELQEAKNEVARMNQEMHSHLVARSTMEHLSQSSEADYGYAGEVTEQTLTQLQNNFNASTRPNDGWGNDPVRPSYNTNNSSGPQYQGQAQAQARPTVPIGQPTVRRGNSYLNEPTHFPLDQGFRTGGMNSMGNFVGNGMSTAFNLGYNNSLSNPPSRPESAFDPAYNQYGVPPMQASNYPAPIGTNRGSGLSPVASEFDISTGMGPSPWNSQTPSESGAAQYMPPVEPMNYRRL…
>Alen_Al4_ctg01_-_Alen_Al4_ctg01g37t1	MRVSSSVCLWWALPMLQPCCCSTSTPLKHQPLFSFNTTWQLLGPFQIGTREATWGADPLEVDGGFRNLEYDQAATFRSSLPTNGTAHWNITTADTSSDALSANASLSISYSNVDWDFLKTVYGWASVQYQAWARGELTISGNETQHIILYTDAVLEYWIDDEHSFGGDFYTYRNAPPVLHLDPGHHRIDLRLVRDVRAFGGILEPSIDMVVGVEQVSGSLDLAKPGILLSDVIDGKLATPHGSVTLRNSGTHDIEITGIRAANVSTNVSTPFPLIGLDTERQMLVARDADDLMSEQITVNTVEDTHGTGIVIVAGQTKPIAFNVTLPSHNASSIAYNITYKIVDSNHRASLEVTQDLKHTSAYKPHKVTFMHPGGIVSYAMLRPPAKNATCHHKHSKLP…
>Alen_Al4_ctg01_-_Alen_Al4_ctg01g38t1	MSTTEARDDAGPHATFKFPAFEPDLLPTHEEEPFGLSSSRNASPSHAAHANGHTMSSDRWQPRKEARVGFAHSSTPAPSNRHGRQKSLSEALHTIRARKGSVSQNAHEIADALKAPLSPKLVMLCAIWYMTSIFTNMSSKTILTALPKPITLTTVQFAFVSGWCIILAALAKRYPRMKQTMPFLKYGIRRPHKEIVVATLPLTAFMIGGHILSADATSRIPVSLVHTIKGLSPLMTVLAYRFVFGISYSIPTYLSLIPLTLGVILACSADFNANFLGLIMAFASAIVFVTQNIVSKQIFNDAASAEKEGLPPTKFTKPDKLNLLCYSSGLAFLFTLPLWLWSEGFTLLGDFLHDASIELSEKPGTYDHGRLLLEFLFNGTFHFGQNIVAFVLLSMVSPV…
>Alen_Al4_ctg01_-_Alen_Al4_ctg01g39t1	MASDSLKVNGSRPGNVRHPTAPGMMMNAHFANVGEDADKEAYEHGVQVVDEDKVFKYVTSLYTPSGGNHAANSSAQHSPNVSKYLNIEHVIPAGFNYHLIAVFGSQSTGKSTLLNYLFGTQFGVMSEQERRQTTKGIWMSKNKREAGGSGMAENILVMDVEGTDGRERGEDQDFERKSALFALATSEVLIVNIWEHQVGLYQGANMGLLKTVFEVNLQLFVKDSKTIPRSLLFFVIRDHLGTTPLKNLQNTLIQDLSKLWSAISKPPGLENSRIEDYFDFAFVALPHKILQPEKFEEAVTKLSQRFREGYNDPKKSGLLDEAELPIFLPQYHRRIPADGFPTYAEGIWDQIVHNKDLDLPTQQELLAQFRCDEIAREVLVVFDEKITPLEDKQAEDARI…
>Alen_Al4_ctg01_-_Alen_Al4_ctg01g40t1	MRQISTGHTSVLALLTLSTLLSTVSAWPNFNLHNSRHAKRQSSGDNPPSGGAEEDLTFNEECDFIIAGGGTAGLVLANRLTESGRFSVLVLEAGPRPEQVRSYESPGGNQFIKGSVIDWGIDTQPQKHLNNRTLQYLRGRTLGGSSSTNGLYYARGSASVYDRWAELGNPGWGWNDTYNLFRKSTKMNPPNSTDELAAFSQDFKTFDASAYGGGPLELGFQGYVPPSTDGFITACSETMDIPIVQDLNTGDGVGVKHGTATVNSMLRRSGSYDSFYQQARDRTNLRIMHDAPVTGIVMSSPPADNATFRNTTSTPRALGVSYIDQLTGFVSQARARNEVIVSMGAFHSPQLLMISGIGPAAELEKVGIESVIINKNVGQNLNDHSVFSIMARAEPFAST…
>Alen_Al4_ctg01_-_Alen_Al4_ctg01g41t1	MSISHSIPPTSSRGDDRSLHYLDAHGDDASSANSDGSVLLSSQTDVMSPTLVPYRGRTGENMAIFYSYGPDGAISSSNTDPLDLYTPVMYGGVYKQNDPVGQYLAQEAFVRGLETPCSVDHTHHPNLYAGHETHSQRSGSSYDSYTYRSTPFLEAFLQFPDPERIRHLHTLHGLLPHIQPKRKLNALSGPQINIIEGYTDNVFCTAVSKKMLVLFLGREAVSKFLHTIKREDNECWEGFPTQQNLVLPHGVASQAAFKILMSWMIRACKVSTMSTMRQIRIPNNMFAACSLAQTLALLGLHKDAYRVDMVISQHFSKRPIYPVEVETLWNCLGEKSKYVYGCIKSFSEQLPSKKSDIAEELEYLRVKCPLLHARICDPRLNEMHKPEPGRQWFAKVGLR…
>Alen_Al4_ctg01_-_Alen_Al4_ctg01g42t1	MRFEVAVLIAAAASASAQAVVGKAYGFASGVTGGGQAAAVTPTTADELAKYLSDDTERVILITKEFDFTGKTATGSGCDRKSCSASSNGQFYLGELSCAASDDNVPVSSIKYDTAGPEPLKVGSNKSILGVGGKGVLKGKGLSLAKNAKNVIIQGLEFTNINPGVVWGGDALDFQGGNDGVWVDHNKFSLVGRMFIVSHYSASRLTVSNNEFDGVTTTSASCNDNHYWTMMFYGDGDKVTLDRNYYHDVSGRAPKLGQDGTTGTFHAINNYFENMKGHAFDAYNGAQALIEGNVFSGVEQPATDKAAKISTFVVDGGSACSSALGRACLANSVDAASGKLAGGSTTSFISALKGNDVTPLAVKDVAAHVKANAGPANLGAASSGTAEKEVSAPKSTKAA…
>Alen_Al4_ctg01_-_Alen_Al4_ctg01g43t1	MQDNSRRKPNTNRQKAQSATESNLGDAASGSQYGNTRTPFYDDPNHVAYGWQQMTALPSFPGLHTLVRGTQGDPPLSTGSRPQTRPVNELQRVAEQSEPSGFNPHPRRSHGPRRPPSSTEAYGRGEHDRSGRDVFKLAPNPLFAKPGVTSVEGVGNKKPQARSALNPKDVNQKLRAHMTEDSISTSLKLTGDLHEKNPQHRAERLVVDELENTRRAARDTERMSILLEEPAPLRIQKKRTDLDDAESRLRSKAFEQARVLRAKQQKEKTTELPGGLDNPESDPPKSVGVGSCGTDTISSHDPGGTKETMCKVNEPEGEETDSLVCAITDWQISASDEELTQKFKHRSAIPPPLDLAAIRTAKQQKTKLIRSEAESKSEFDGDDRNSNCGAKAESIRSFA…
>Alen_Al4_ctg01_-_Alen_Al4_ctg01g44t1	MSSTSAPLAPAQTHALFDILIHHQLYAEIEAFKNPSTISHYGHPFRKADGVQTTSPLLQNMLNKFALTNPALKNLGSSFWQDKIQALVAKMAEAELSESYDKGAIGSRKALATAASSIAEYIGRGMLGGYPVALKEGDGKKQYDTSKPGDVLEAWEECARSFIYGHLLDQLLEKVTATDKLEDHSSLVQAGHEFILLNVASFLHHVFVMSPDGQYLVRLLENTHRLIPYYMIKQTLRVGNAASMINGMVRLILAKLSVTAMTNWIGLTNNSNDGMNLMQQIISTILAWDTAEFQKRASKLESSRDAPDKKVIKAIKAHVYASRDRHEAARNMSIQEKKSIIAIILETADTPIKPESLKEHQHDVAMEYYSTYLSIRDREEITKVFCKSNPDVLTSAVRD…
>Alen_Al4_ctg01_-_Alen_Al4_ctg01g45t1	MALVSRFLVHRHSKNNNRDIYTVDGNNGGSQQLPRTSSSWKQLFAPKQKDSNSKWVPTLSGLVKAGDEGLCSALFTNPHGHPGEVSFEAICETFANELGPRSMTERSAYSGEIGKFLLSTKRSATSPRRVQSMSLGRAPTGRGDVAPLVKRKSLDMSAVERGLGRTLSIKKPAPALVAMDNGLFEQESARTTQRTWMKDGRPAERHDGRMGVRLTSAELVTLSVLLGSSVISTTSTAPFEKGAFGITIWCTPVNDGRYQVSLRQHKRSLSQQPPSGSGHSPLFAKHFACGSLPFTQDAKSISSILITDDSFEAVRSGAPLTIRKRSQQISQARLLSTLPSSRELAFHTVEASTKSGPSTPLIHSIAMLPFIGGLPPLASAPLINTVRFVASDGLTPGRL…
>Alen_Al4_ctg01_-_Alen_Al4_ctg01g46t1	MASDRPCDAGDVPTASSDTSDQAKTKLKRRKEKREGPPQLQFLVATNPSQFRDENAKKSIRSQAMIHWRHEENKRKRRGSSDDNWILSSSTNHTTCSGSVRSGNVANIPTRTRQPESSQDTDPSNPSDTEQEQPGRVYSITNSDSLGTSPSSSRSVDVGSSSWQLTAKETASYFPLYQKRTQAIMDQSVTDYEESERHEERQLRTLIVGLATFYNVGCSHDPFDVLPQFRNPQLNALYLSRTCMRAFASDFTMKKWLPLMLSHPHIILSATNLASTWLDMHNNCSGDSTTTAMVKAETIAMINERLANPVLQLNDATLIVILHLFAGEMWVCDEQALRIHENGVATFIARRGGLASFTHSKTMAEVAAACCLHCDIFCEAEVLPPFQDWVPIDFAPIES…
>Alen_Al4_ctg01_-_Alen_Al4_ctg01g47t1	MWSLEDHCRERGLVFEQKPSVPRAYSCSPPRTPKAPVHTLGFIVHDTPGAYESQNSYFPSITSDADDSAPSNSAIADSSPLREHDTFSADNNTEEPTFNDSNIEFDALELWRISAAKFKSDGECASPDTEMQGSPSEDTMECSGEDPSVFILQHAGSKVSCHDFDEYLISGPPSKRFKTLPTAIKNPVSSPLINSADPAKSIYHNAKNTSSNFLLKLLSSPKVNLVNEVTAEVYIEGVSLHMLEYFCGIDTITSLLFASNRSYHISVPPLHASKDGVVRVIRYMRRWCEKSSKRPTGEFHTPPGIKEGISTSLACRFFGLNADAERIEKLVLEDFMGNPRFFITDEDVELIWCHYAGKLRDSPFGDAIVWYVLEDVMSGKHALADEVRWMLEQEEYEDL…
>Alen_Al4_ctg01_-_Alen_Al4_ctg01g48t1	MALFDSTKHPRHTSPSTSYGRDEDFERIDPEMGVKRGLKTRHLSMMALAGIIGPGILVGTGGALSNGGPASLIIGFGIIGIIAWSITQSLGEMTTLYPTGGAFITLSERFVDKAFGVAMGWNYWLVWGCVLANEYNVISSLLVFWSDKVPLWGYFLIFWFAFLGFQMLGVESFGEAEFWLALVKLFGLCAYFIFSIIYASGGLIGQDEALGFRYWRDPGAFTNGFRGVAQVFVFASTFYVGVEAVAVAATETRNPSVAVPLAIRQVIWRILFVYMGVAFFFGLTCPANADGLINGESRALKSPMTIAIQNAGWEGGVHLINAFIFITVVSAANSSIYIGSRTILFMAKEGGAPRFLGWTNSRGVPVYAIILTNLFGVLSMMNVSTGGGKAYSYIINLSG…
>Alen_Al4_ctg01_-_Alen_Al4_ctg01g49t1	MYISQYALVAALAASVSAHGVVTKIQGANGVSMPGLTVADGTPRDCSSNGCGSQADTAIIKDSDIASGKATPLGRTQGNGPVDASVMIAAFMGNGAAPPTNQGASGSVGVEDNIPKNAQGGAGAGARRRQLLGGLLGGGGGGAGGAGGAGATGIAGLLGGGGTKAVGPPEAGVAAAQGAGASTGLPTCADDGTVTMTLRQINQDGAGPFTADVDGTSGGTDEAAMQSATVTKDVPGLGVQGISLATSTEFEMKVQMPQGMTCDATVAGTPNVCVMRVRNGAAAGPFGGSVAFTQGAAARKRAVAYRLKKRMELSRKY
>Alen_Al4_ctg01_-_Alen_Al4_ctg01g50t1	MSYNQRETPILAELCTFLVEDVYGELAARVYSVLARHGRQTLAAVARASYLNGRQIKYGLVILLQQHLVFHSGNDAQPTYYEIDWQNSYALVRLGKVTKLVEDRFGRKAANVMTNLLRLGHTRIADLKEAYFPTTTDSDDDSDDGLPNGAGTKRKRGSGNDANGSAKTNGVVNSDADDVKPVVNGDGDHAHAKTNGTANDGPVEQPEQEHAEENGEIASADELYDIIERLIQRGWVRTMTESQYLSPGDMHDMLQQETIDQDLSGQQPTGTKDKAICHRNTLERKRNMRDKWLEVPRFSKRRQADQDYSNPTKRVKINGANGYASSSAASPEDNLVIRVNPEKIAVAMRTEQLVQLVDQRLGPVTAHIYQTMLRMLEANTPRCYEEYPEPPTAGDEGAD…
>Alen_Al4_ctg01_-_Alen_Al4_ctg01g51t1	MLSRTTACRGAQRAARQLSMTQTRGLAAPASGSFQYQSGEAKGVKFASRDFAGPTTTLALVAKAGTRYAPLPGLTEGLANFAFRATERRSTLRIVRESELLGATLTAHHSRENLVLEAKFLRDDLPYFVELFGEVASQTKYQPHVYSEEVLPLIHFAHTRFVNSPIEMAINSAHSLAFHRGLGNSTASASQTPYTKYLDAETIEHFSKSAYAKSNFAVVANGADHGDFSKWVGQFFDDVPSSPVQQLTQGAGQTKYHGGEERLAHDGGNAMVIAFPGSSSFTGQFYKPEIAVLGSLLGGKSAVKWSPGFTILGQAKATPSTQVNTTSAIYSDAGLLFTSITGSAQSVAETAKAAVEAIKKIASGDISSEAIAKAKAAAKFKELENGQDIRAGLQLSGNG…
>Alen_Al4_ctg01_-_Alen_Al4_ctg01g52t1	MTDSSHRHSTAPHQDADAPLTPDGAGSSHVNIIHPTPQTNLPLRQAFRQPICAPAPKIHDITDKFLKASNALEVGQLVKDDYFTLFESIGAIEIMDPKMDSGFLEPGETLEDNYDTSTPLLPEELIGIMDQLLCYEMAWHTGYPLSQTLFTSVYIDKLLWPEPKTLEQSQFLPNGESAHGPSAQALLQVLRAYCLALIKGCDYVIAKITSRDYFEEEDFCTQTYNRVLFVSTPIDVFLRELDAAVEVIEDPALDVKDALRSAITSRLEFRRDFLRALDLEHPLEHMASSWPPVLQGMTTIKATHQLGQSVPGAFSTKMQRRLASTVPPRPIVEFDFKDALDLLEHLCVDCEEATRFVDLPQDPLEYQSFLWTFASRSPAPLAYSRSYLSTLLFHPEILN…
>Alen_Al4_ctg01_-_Alen_Al4_ctg01g53t1	MAAAWKAAGLSYNRYIQVASRVVRRSLKEDKRIIAERRGVSELRFAKWENGKQGEVKELNDAALAAQAAAKAEASSSA
>Alen_Al4_ctg01_-_Alen_Al4_ctg01g54t1	MFRNNYDNDSVTFSPQGRIFQVEYAQEAVKQGSVVVGIVSKTHAVLAAIKRNAEELSSYQKKIIPIDSHFGVALAGLASDARVLSNFMKQQSLASRLTYDRAIPLSDITSRIADRAQTNTQQYGRRPYGVGLLIAGVDAKGPHLFEFQPSGVTQEMVACGIGARSQMARTYLERHLDDFDSASREDLIKHALRALKESLSQDKELTVDNTSVGIGGIGEDFALHEGQDIAEWLSTTFENVEGGNEDGAEAMETDS
>Alen_Al4_ctg01_-_Alen_Al4_ctg01g55t1	MAGIKTIIGLSFVLAIGFLLVILSAALFHNYLTLLVVATYLMAPLPNWICGRASSQDDFMESAGNGIVDFGRFLTGFFVVMGIALPTLLWHSEQIAGGAAAMSIIGGLTIYSTIISFTLFFHEDQDF
>Alen_Al4_ctg01_-_Alen_Al4_ctg01g56t1	MEENRLFRFPRPAWLNSANTRTFGVYTAGAMFALGFYSLIDVAVWSKSIKNPSDPPVHVTFIDWIPGICSALGMLVINSIDKSRLSADSFSYSGNGVAWKARLVLFLGFALLAGGLAGSVVVLVMKYIVPGYVWPTIWMGVGNVVANALIMLSSATLWIAQNMEDEYTYNLAL
>Alen_Al4_ctg01_-_Alen_Al4_ctg01g57t1	MAPTKPSSKGKSGPKGKSAGGASKSKSRGKEPEGISKRKQKSLSLAKPGGAQKTKSFRTKDGKKKKRVYTEAELDIPKLNSIVPAGIAKPKGQKKGKVFVDDPASMMAIMSVVNAQKEGHIESKIMRSRQLEEIREAKRKEAEGRLDDKKADFEERKQNLKKKRKRNSEPAPTDAADAESSKKPSKKDGKFKPKKRVSFG
>Alen_Al4_ctg01_-_Alen_Al4_ctg01g58t1	MSWLLGHAKTSYAHHTSPIPLVTKSGSKTSLPEIAQSSIPPCRLNPFLFNGHLQTMYTAVKDPGPPIYYKRHLYTSNHTVYPGTFAVDFVVSKEEGSEAPTDSELPERTTLFSSKEWENISSGDNKPMLIALHGLTGGSHEVYLRETLAPLTATGWEACVVNGRGCALSKITTPQLFNARATWDVRQAIQELRALFPNRPLYAVGYSLGANILTNYCGEEGDNCILRAAVANSNPWNLELCNVELNRTWLGVEVYSRTMGRNLMGLYERHKEQMLQGAGIQAEVVEKCKYLYEFDRHVQCPTWGYPTEGAYYRDAQSVDALVAIRVPFLGINAEDDPISSKAAIPYEEFKQNPYTLLCTTNWGGHLGSFQLGGGRWFATATASFLTKMHDTVDHEASKV…
>Alen_Al4_ctg01_-_Alen_Al4_ctg01g59t1	MDPRYNQQYGYPNGSNVPYTPPQPQNGYQQYGQPPQYAQQYPLPQMQMHHGYPQQQQQQQQRQQQQQRQPQVVIPRPQSQQYMPMPQQPYSPQQQYHQRQYQHSQYHQTSHQQPQYRQAPPPQPRQQPQVMIPQRAPNSMSYPQMSSPQVSSPNIRQVQVPIQRASNAGISQLDGTQDMYRRQSAQQAPAPYMEKPVQRRTSYQEPAQRPQQRPPHTPVQARTQAPAHAPPQPQPPAKAPTQVQAQQQQQQQHQPHHQHQQYRPQPQVQVQITPKRTPSQSHTPSKPIQATPTQQTPSTQTSSQPRSHPKVVIPKPPSHQLTSPTKASQAQVTNKALPADLSVMLLSAADEYIAAARGMGSVIARQKRDGDIQQYYKLMSTAMGCMDTVLRNYNMQPRD…
>Alen_Al4_ctg01_-_Alen_Al4_ctg01g60t1	MPAAPDMSAGIPSEVRHIMLSFLPNSSLKNVRLVNKQWSAAAATILWSDLTLDLVETGHRKLDALLDSESGGVLDSVKKLSISTGQSGLSTTCRGYITELLHDLFIALPRDCLIQLSSKHLTFGRRTAELLLRTQSNLRTLTVSLSEQGGIPKKNLVRGSLDNLQELCISFNGKDGQDYKAFASWLTETPRLQKLKIVGKSRNGLNYFDGWAMPETGILLNLRELELENLHLPTSVNGILGILNPPDLQVLKVTRCHDTRPLLTSLADALKDTTAGSLKTFRYVSADLADSCDSSAGLISAATGLTDVALVTSGGLLLDLSCLQQNGKSLRRLVIVASHKELCYSAKDLELLVTMCPNLQALAVSLGDFNEHINSLQQLEPFRLSKFTETLQAIKTIAR…
>Alen_Al4_ctg01_-_Alen_Al4_ctg01g61t1	MAMTTEAPDPRTFQSWEDAFQYPIPTVRKLEQQLRTTADDNREKLRSLVGTSYRDLLDTAETIIDMETQMELVESNLGRIGQNCNSRVLDKVSGNALKMDTHTRGSDAERYTFASQLSVLRSSPTVQTRLLRKDDQHLLIAKVLVISRLVHKALSQSENKPPIVDQLWEKLLSARRKLLRRIDRQLASTTGGSTSLVESMCAYALATSSAPSDVLKHFHKVRKEKIVNEIKKGGDELAKRGINALRLCIQTCQDTQTIFPRRLAEALAKLKSHPLIQDSEVRGLYELNLDVHDRWIGDEVRNYTPWPRHDELQRSEAERILHRWSKDTIASFLKEVKTALQHEVRLAEVASLRQELIETWMLSGPRMTGVKFANVLDDLRDTMNEKLETIVRARTQALQ…
>Alen_Al4_ctg01_-_Alen_Al4_ctg01g62t1	MMQPYPPQHQADTDTHSHRGPLSRTWPQLFKKRRRYSPVRESAQSQAHPAQQTQQVQPPPQPQYVQMQPHPQPQIQTSVPLRPIRQPSISTQSMRSPSIAADTASTISTISEISTQPPQPTKRVPIARRTSSIATTDSNAAGGVTTPQADLLASKSNYELISSGQHLEMGLHFSTAMATGVMMKRATHRAAEQARRDRMKTAMVDLAEFLLDGEVTFGSGTTCFVVMRGEGKDGGDGDKGSIFSETSGMSGLSGLSEGSGKGKPGEKKTVNKARLIEMALEKMRAQEKEIELLRKEIEDLRCGDKMDET
>Alen_Al4_ctg01_-_Alen_Al4_ctg01g63t1	MARLRPIAVVRETWMIYTPIERRNIAIYIAGIMMYKFGLEAFNGSVIALATNRYDELEKRTHISITFQRVGILTGLNQAFQCVGSILIAPLIKRYPTKNVLACAILIFGVMSSTLLILDAATGGRFVPNGHPKGDFSYYGDYNTDGMIPIYCVCGVVYGMVELIRRVIPRDLVGGNVQKLRRIDSLIHIFYEVSGTAGAFCTALALIPHFGNNFSFIITPIFFAAASFLWFFIQEAGPQAESNLVLEGQPTYVKAVGSGFYLFFESIWTGGKIIFTHRKFVWLLPGYAIALYGHRYLENAIAPAVARRYLGNSAWAQIMVGGSNFGELLGALFVFMFTNLVQTPMPWLRIDAVALLIVWYLPFWHPPKGDVGQAWIVAATFLPISFGWAAGDVSLAAYI…
>Alen_Al4_ctg01_-_Alen_Al4_ctg01g64t1	MADNVGLTTPRGSGTSGYVQKNRSLLRPRDKVAPYQKDFDHARHRPRQPDAEILEHEAKRDIEVKVFELRDKLEEEGVDEDDIDDQCEALRRKLDQERKDGKDLGPNAKRLKSHQVHDLAKAKAEESDRMRKALGISEDYEEGSHWRKQEGRLRESLAKREAEDDEKADRARDARRYNEDDSD
>Alen_Al4_ctg01_-_Alen_Al4_ctg01g65t1	MSAQEQELTELPFPPVTKNHILNCSYHNWHPRYRAVTPKARLVPLPAAFLDYLRSDGIVLPPEDNDNPTWSDDDSGIFSGADNNEGGEEEDVDPSVHWRDTHEAIERTIEELGGKVAPKLNWSAPKDATWIAATNSMECSTPNDIYLLLQSSDFVTHDLAHAFDDTADQSTSPDPEIAYHLVLRKWINLNPSVEFRCFVRNRQLIALCQRDLNHFDFLFNMQDKLRQTIHDFFDSKLRDTFPDPNFTFDVYVPPPHDRVWVVDFNPWAVRTDPLLFSWMELLTMEVPEVKATNETEEVVRIPIGAANGTTVVSLDDLDDMASASGSDESDDDDDIEEIWQPEFRLVRRDDPEAYGFTTPQYSAHKLPKDVVDAGSGGEGMMREFAMQWQEAQRLAEQQR…
>Alen_Al4_ctg01_-_Alen_Al4_ctg01g66t1	MRVHDAPRAPACSPAIDMYCGFLSLPTELRCHIYDYLLAEPHAITISAGYTTLFGHRIRDKARRVDVPGLPLDFAPLVRSNHDAGLLSVATTPEVALDKEDAWTGGRPQLQLPGPLALLRTCRMVNDELKDYMRGRKARNAARKAARAKATPASASDDTEGLSLYVSYPHGVLVLNHLYPSLLKQARRVYISGHYTSVKDSDLPLDTSLDSNSDLSLTPQSSFAAATPVRSMYRATANQTPRLRSSRTRLRLDPPLQRTAPPSKSPAAFPAVDKSTSSTALAALADTLCVLFPSTPAPTPCKPPQLVSLQARILYPGPDSYSSVWSDESSPVSHLLRGICGGRIDMQVKRGSLGCGVSVGVAPQPEKRVVSTSWENWRIVEQATVAPNGRRMTARGREI…
>Alen_Al4_ctg01_-_Alen_Al4_ctg01g67t1	MRTSQPTRTSTTSPPLVNQSQDIVDFVSETRSFNVPSFLLPSLRLETVDERISFQFFVTHAGPALARSSNSIFWQRQVLQAAHQHVSVQHCLMALGAMYRRFFECTSAHVDSDVANQHFQFALRQSNKAIQQLVKQQTRSSSIDAADKLTVMTCCILFGSLANLQGQQQAALDHLRSGIRMLRETTSQSHNRNAHPVSLGSLRSILTGLDIQARSSINWSEIQSWEPFFPTPQPSDAADIDISHPWALSELHCRIETLLNDTLAFNRGCVARPFSDRESIHHEHNALIWRYQRISQTLSSIRSLPLPSSHSPSQGLSRVLLLHAQTQHYLRSSILPLKHHFNISSPLSHTPYDATTLFSDMMSNAVHLLSATSPPGPIYTVAPGPLAALWLIATSAPSS…
>Alen_Al4_ctg01_-_Alen_Al4_ctg01g68t1	MHEDHQYSLPGREASENTMTTNRPFFGSFLAAFRAQPAIQKAGASQAISAASYSHTTALPQTQGYEPSNATRTITTKTRSPSPGATTTVMQTTGQFQPTRQHAAPYHRSTSPTHTKAFPIPGASQRSRRGSDSSSDGFNETMGTEKWYIGGRTATGEEKFYKLGMVKRHRSADRLSLDKLSI
>Alen_Al4_ctg01_-_Alen_Al4_ctg01g69t1	MAPPNDPVPATTAAPQINEEPEKQTQYASIVPERDQRLQLQPTISSISHDDMAHATHVVTGDLDEVYNRFTERRKMVIVAAMSFFGFLAPVSSTTVLSAVPEVAATYNTDGSIINISNALYMLFMGISPCFYGPYGNIYGRKWVSVASATLFTAFSIGTALAPNLAAFFVFRILTAFQGTAFLVVGNAVIGDIYKPTERGTALGWFMSGTLIGPALGPFIGGIIVTFRSWRDIFWLQTALAGTAVVLCFFVQPETIHVKRSKELNGLSTPAKAHKMWQWLNPFRVIRLYRYPNLLLVALSSSSLVWNMYSLLTPIRYVLNPRFNLSSPLQGSLFYIAPGCGYLLGTFFGGRYADHIVKKYIRIRGHREAEDRLRSCLWFLGGVIPACMIIYGWSVEKRV…
>Alen_Al4_ctg01_-_Alen_Al4_ctg01g70t1	MHVHEPARPVQGKSIAAFSQRSPYKAYRSPFGPQYTIARNFHGITARQLIKAGVLAGGFGGVAGFFALFFFAEVPKVRDDIMMRTPLGSFFKKEIAPEDNPF
>Alen_Al4_ctg01_-_Alen_Al4_ctg01g71t1	MFIARSEYDRGINTFSPEGRLFQVEYSLEAIKLGSTAIGVATGEGVILGVEKRVTSTLLETSSVEKIVEIDRHIGCAMSGLQADARSMIEHARVESQNHAFNYAEPLRVESCTQAICDLALRFGEGAEGEESIMSRPFGVALLIAGYDEDGPSLYHAEPSGTFYRYDAKAIGSGSEGAQAELQNEFHKSLTLPEAEVLVLKTLKQVMEEKLDSKNVQLASVTKDKGFRIYTDQEMEEVVGRLPTN
>Alen_Al4_ctg01_-_Alen_Al4_ctg01g72t1	MQNIWPNITKSKNFYPLCWSKPVDMSNLPVQRIDLKPPPLEDLVDCIQNGLRQNFKSASVSVEQCPDLQDAPYNLAFAGLSGCPRIADVGGQPNLAPTPDFTKKYNLLDIARLMEMREEQGALLGAAAGPFHVVGMNSELMPNLSWKNREVSNETHFAKVNGEGSALCEKLPSHECGLMANLFGSSGLPGPSLHVTASSRTGPLNFTEAIRRALQDAYGTKTISLGGVFLISEGKAKLHVMPDFSPTPLITDEQKEEWLKFYEMVAPLVCLSVLHSHDPGLDLRIEHTHCFSNHGEGGHYHYDTTPDDVRYEAWFNIAEILYRIDKP
>Alen_Al4_ctg01_-_Alen_Al4_ctg01g73t1	MRFTPSVVASAALLSTANAAIKGFNYGAQFNNDAAKTLTDFEYDFNAAKNLPGTDGWTSARLYTMIQHGTQNTVIEAIQAAINTNTTLLLGLWASAGQESFNNEIVALKAAIAQYGTAFTDLVEGISVGSEDLYRISADGAGGNPGTEPDVLVNYIKQTRDAIAGTSLSGAKLGHVDTWQVYVNASNSAVIENLDFLGIDSYPYYQSTFANSIGASSDLFFDSYNQSVAAAKGKPIWVTETGWPVSGETINQAVPSADNARIYWEDVTCKLVNDNVNLYYYILQDVQWGNPSPSFGIKPGGDLAQVSPLFDLSCPAAAKNVSYFPIILMSSTLSPLLFTFIANLSFLASALSYLLPVAQQCCKCPRTQHFPVHSPAWAVKSSGWIARANANAKSNLSVL…
>Alen_Al4_ctg01_-_Alen_Al4_ctg01g74t1	MTNTTTTTTLADVETKANWAFTALSTLDTWCGSSCHAALRCWLQFLLLVVLVGAFMSVVLWCLGLKRRMALSKSTGLDSARRLLDKSDMESVVGAFRDSDAGAEIAKARMVDGGPDVKDSCVVL
>Alen_Al4_ctg01_-_Alen_Al4_ctg01g75t1	MRTPFFLASLGLLASAADPQPSGAPGGNTFDCGTGTQSADQSFLDTIQQLHDDKPKGSLAARAAELAARDDPVKIQSIFHIVMTNAAKDSITNAMPQAQLDSMNAAYNPYNIFFELQNVTWNTNDAWAVGKKDDDTDMKKQLRQGTYNTLNLYFQTDLSGGVLGRCTLPSAIGNGKGDATVYAGDGCNINAYTMPDGLMDGFNKGKTAVHETGHWLGLLHTFEGYSCDGPGDYIDDTPVESTATDGCPTDPKKQSCPAQQKAGESDPIHNYMDYSIDDCYEGFTDLQVQRMRSMWSMFRDGN
>Alen_Al4_ctg01_-_Alen_Al4_ctg01g76t1	MEATDSISSQDPSRQDTKKTKSRRPPNTAFRQQRLKAWQPILTPKTVLPLFFIVGIIFAPIGGLLLYASSLVQEISIDYTNCNTSAPLTDAIFDPSAPSTLDDIPSGDVSATFKTAVKSQPQWGKAWENYTWPSGRVQNTSVCILSFEIPNDIQPPILFYYRLTNFYQNHRRYVKSVDIEQLKGTARSVSDIESGDCGPLDAVNGKPYYPCGLIANSMFNDTFTNLNASNPSQNGGSPPVYEMTANGTSWAHEGDLYGKTKYKPSDVVPPPNWQEQYIDGSYESLDELPDLHTWEAFQVWMRTAGLPTFSKLAQRNDHDVLKAGTYRLKIYDRKSAHDARQQLANMFPGFPVQAYSGTKSILISTRTVMGGKNPFLGIAYIVVGGLCILLGAVFLAAHL…
>Alen_Al4_ctg01_-_Alen_Al4_ctg01g77t1	MANPVHKSPPSNRLTVSSLLSPPEMERSNSFGTSMPSIALQYPTFDTAANKHSLAQPPMFKMPAYASPPISPFDTQSQKENMDNSSEQGTLDPPLFRRDSTTGALAPDVPLFSSQQSTQDAISQHMQSTDYAQLPSKPAEADYKLIAQFQATVFKQAFKNPDAHKAWRAQERRFEERYSRPAVQAGGIQKRPSPKKLAPAPAPRSRQPKVALPKAAPRTAREPKPKRTPKAQLLNSFEEHIDSASPKSARPATTRDDLDYNAIPDYSPPLDSLRGNEKKLKAEWKGNKLDLSDDADRHLLHEAELELASTLRLSCATYLCSKRRVFQARINALKIGKEFRRTDAQQACKIDVNKASKLWQAYDKVGWFDAQYFRQHV
>Alen_Al4_ctg01_-_Alen_Al4_ctg01g78t1	MCGGYIARVDKCSGDDALAPQLALQASQDAIEGYRDKIKAGWSAAIGGFAQDWEQLLPGFGNSAREPTFADEVECGRGVAFLIVPHTGGVISTP
>Alen_Al4_ctg01_-_Alen_Al4_ctg01g79t1	MSSSTLPTSRDFVTQLLNSLPLLPHHDADANPLNDAPDAVKKQILSLQVLFPNELLPALDLLDRKLITRFLISNAEPPPINSQMQTSDTLLNNTSSPDTPITPPPPPPQNHSHSGDTVHYVRSAQQRSSRYSTSYDSTTSYEVRLQAWNCTCPAFAFAAFPPVHAEPQVSNYTPPSASTDSRDVDVAEEREAVEWVFGGVSLGAGMPPVCKHLLACVLAERCRGVFGECVEERRVGVETAAGWAAGWGGW
>Alen_Al4_ctg01_-_Alen_Al4_ctg01g80t1	MPATTAETLSLVTRTVSVAPLVLLSAADHYGRQAKGTRKRVVGVLLGQNDGKNVRVSNSFAVPFEEDEKDPSVWFLDHNYVESMNDMFKKINAREKLIGWYHTGPKLRASDLEVNELFKRYTPNPLLVIIDVQPKEVGVPTDAYFAVEEIKDDGTTTSKTFVHTPSIIEAEEAEEIGVEHLLRDIRDVAVGTLSTRITSQLQSLQGLHLRLRDIGQYLQKVLDEDLPVNHAILGNLQDVFNLLPNLSTPKPTPVGGATNGVGAAASAAGAIDNGELARAMSIKTNDQLMAIYLSSLIRAITAFHDLIENKIQNKQAAEDKEAKKDEGKDGEKDKKADGVNGEAKEGDKSKEKGKDEKKKP
>Alen_Al4_ctg01_-_Alen_Al4_ctg01g81t1	MTIQEATHSATEVLSQPTKWLGMYSDFITKNSSAVSQIESALRSLTYIIPGRFRESEIASESLHCGVQCLSLYHDTLLAKAMAQMPGTRRQPLTPHHRYTKFWTEKSPTYKRIATVLQMLQYTELLWEMAAKRKGEKMRWRVVVLLEIIKAVCRLLLLRLTNSRPLLSPSLPQREIDPSSLEDSSASADGMDTPPSERSVEAENWTMPRTGLSMPSLPDSSDISNYLLSKVLTADDIKPPKALLHRVSGKGELAEALYILRPVAYALAMQHFSGDRKSWRPWLIGVSIEYGARQLAKKDFQERLAGGLRGLTGLEREELKKRAWALGWWTMRGAFYENITKSWIHAITRKLKSKPLLDIAGGVIEDYEFLWDQYYFSTTTL
>Alen_Al4_ctg01_-_Alen_Al4_ctg01g82t1	MATTTPTRIPVPQVAIPPSQEPLFTAINTYVHTYMSQYDNSHDYQHILRVLSNATRILRDELNATRPRPYDTTSLFLAALLHDVGDHKYANPGTDTATQVRTILLDHGADACLAAKVQTIVTHVSYTNEVRDPQSVVDVLALHPELAVVQDADRLDAIGAIGIGRCLSFGAAKFPEQSMGRAIDHFEEKLYKLEGMMKTASGKDMARRRTDVLRGFAREWREEEALSFELR
>Alen_Al4_ctg01_-_Alen_Al4_ctg01g83t1	MLDSEGEKKTARLGPELRDMKLEEGATFSAGESEGIQVKAEDVDAATPSAIPARLKSSRSKSQSPMPKHDSEASSPADSTKEELVGGDIVLKMEPGPGGRALKLSRSASQKVVSRPPPLYLDLPDSTEAAKETFAVLPECTYSNKYIGTTDPALECDCSEEWDAVERRNHACGEDSDCINRATKMECVGDCSCGRKCQNQRFQRKQYADVAVIKTEKKGFGLRANKELAPGDFIFEYIGEVIDERTFRRRMIQYDQEGIKHFYFMSLTKGEFVDATKKGNLGRFCNHSCNPNCFVDKWVVGDKLRMGIFAERKVKAGEELVFNYNVDRYGADPQPCYCGEPNCSGFIGGKTQSDNATKLSHATIEALGIDDGDGWDTAVHTKKARKKKVSEDDEEYVND…
>Alen_Al4_ctg01_-_Alen_Al4_ctg01g84t1	MAVTTKRKRGTVSYKEPSSDEGLSESAGYEQTPRRKRTAPSRRSARHQANDDDSSRQTTPDPSPEPEPSRKKYKESRTRRHRRVSYKDISSDEDEDPDADFEVPDEHVRTSQRQARARTAPSPHPQRSRMGRERGRPKQKLVIGRKRKPNRAPDAAAETPLVLSDGHKPAWQSLPYHILLQVFVYASHPLLDENMRPTASISWLVQVARICSTFTKPALTALYRDPPIFAVRQTRKTLVHHLIQPPDEAHEDYRVMPKRLTLDAVQMSTLTDPTHSIADLAALVRSLTTLREIDIFDPVDRPPYRGRLRRVRRWVYPDELFAALRESELRLRSWRWNSTFCQHGPLWMKSIHGDHAFQSLRELTLVKYHPEPSREEDDENEANTEPTVEELVGSALAVL…
>Alen_Al4_ctg01_-_Alen_Al4_ctg01g85t1	MEQPAPERQWTEHEKVYLLAEILKAAPVSSHVLYSFIRDNQIQVRWNDMALPSGRSVHACQRAYGDIANSFASTSYGRPALPNPSMYPGSELARKRPHSHDVAPIGRLLQPRPPHPYASEYVSAGGPAYASSNNAGNEPANKKKRGRPTKAEAQQRAQEAAARGEVYPPPRRGRQSNTAQPEPSSSGPSPEQRPQAQTPPLAMMHALPTNTMTPQHQIHTEQSSESSSGKKRRARPQPLELEKPQRHSSEMQSPLAYGSADHNRSHAYSSFTPISAPLPSSAGSRDRDTRMEGMEEGQPRTTTPHSFKDTVGI
>Alen_Al4_ctg01_-_Alen_Al4_ctg01g86t1	MAAPTPPHPPVSPDSGPTDPNLPKLPAGWIAQWDNSSRKYYYVQISTGVSQWDLPTSEAPIGGSHHGTPAQNTNPYNKPAGSEGPGDVGDGSRGIAGDGQTGDRSLGGFAMNALMGNNKQSHGGGSNNLVGQLAGSFLGGGKQSHGGSSGHGGGGSGNLVGQLAGSFLGGGKQNHGGSSGGHGNQSSGGLGALGGLLGGGSSSNNHGGSNQNHGNQSSSSGGGLGGMIGGLMGGGSHNKPSNNDYGYSHGSGASSGGAYTGTAPPTSYQPGGQHNSGVQSQHGYGSPSPAQQHGGYGGQQQHGGPPGQYGGGQQHGQSQYGSQAGYGGQPGYGQQGPGGYGAQAGYGGPAQHQGGSQGYYGGPQNYDNHQHNQYGGAPQYPPPPSQGGGYGGHQGGHPG…
>Alen_Al4_ctg01_-_Alen_Al4_ctg01g87t1	MGPVPRNKPAIIAPVASTAATNPLNPTNVQDAAADADTSMVDAPTAATQGGGTQDTKKRKRKEKEAHIVHQTTFRKPAWSYFHLTLITPGTAARQPSNSIAPSETDRIDALTVSTLLSQPLTAYLGTTGSAIPIDILHTDGRSAYIRIPRQDARGFRAALSGWIGGCDAGSVPGAEEGGGRVRVAWRVVAEGGSLGLLRGGGDEVFGEKGVAY
>Alen_Al4_ctg01_-_Alen_Al4_ctg01g88t1	MSYTSSAETLNMETLNVLRSRKAIKATNVSQGTAGTTSPEIKIIKAQLKVAQLGEAKLQTRVKELEDQVEEFKALPAQLAALKAQVENSNPAVDTDLASIREDIKSMKEQQQQQAMKCDTVEVAIKTAIQPEIKRIDALRTEHIKTQEGMSKKLEASQSLCEDLNKRNLPGQLLALQNNVKDLSNTIHTTGQKVTDHDSGLKYLRTDIDNLYDDVREYIGPIKRSYTDANKTTVIERIESQEEKLRAFRKEQEYLSGEQKKLSTKVDSLPADPTDSMSKRLGDMENIVSSLGEDTQQLANRVDILEAVPATSVLAASSTDNEQLNKAVDSLKTRVSDSENILKRVQDNQLEQQSKNGLIQALQSEQARLSNEHVEIVGQIEKVCSEQESLANEQNALHT…
>Alen_Al4_ctg01_-_Alen_Al4_ctg01g89t1	MAVPITTIAESKELRGLNLIAAHSHIRGLGVEPDTLEPKLSSQGLVGQEKARKAAAVILRMAQEGKIAGRAVLIAGPPSTGKTAIAMGMAQSLGADVPFTMLASSEIFSLEMSKTEALTQAFRKSIGVRITEESEVIEGEVVEIQIDRSVTGSNKQGKLTIKTTDMETIYDMGTKMIDAMTKEKIMAGDIISIDKASGKISKLGRSYTRSRDYDAMGIDTKFVQCPEGELQQRREVVHTVSLHEIDVINSRSQGFLALFSGDTGEIRSEVRDQINTKVAEWKEEGKAVIVPGVLFIDEVHMLDIECFSFINRALEDELAPIVIMASNRGNTQIRGTDYRSPHGLPLDFLDRVVIVSTHAYNSEEMQQIISIRAQEEEVDISPDALALLTKIGLETGLRY…
>Alen_Al4_ctg01_-_Alen_Al4_ctg01g90t1	MKLSICTITATLFASTLSAPTAQSESSTSVAEAPNSDIERRDDGDGKYFHEPGGDNTLGHYDKRYFHGIVSDEERRDTQKHMVRAYLDFFRTNDLDTWIAHGTLLGWWWNGQRLPWDFDLDTQVSGATLHHLGEAYNQTNYSYTSDDEQVNRTYLLDVNPWIWQRERGDGKNIIDARWIDVRNGLFIDITGLSETHPDNQPGIWSCKNYHRYRTDELYPMRETMFEGVVAKVPYSYDKILTDEYKESALVNTQFNGHEWNPNAKVWEKTEETLTQEEEERKKQEEEEKKKVIKQAQMA
>Alen_Al4_ctg01_-_Alen_Al4_ctg01g91t1	MGTHVNMAHPDLLGLIYLPNELLDAIVALLDQPSHYALALTCKATNPSASGALYSTYTNRDAPSKAPFHLFLRTLCERSELAAMVKRLDIRGWRSEFEVATGAPWQGLTEPRKQDKTRSQRTGPLFVSTSRPVTTVPKSYKLFEETAVEIGLISPHEFPSISTLKKTVIVGSTLKKREDFARLLRHGVEDAQIVLMLALLPNVAALYIDGMSVYSTLDWHYFLKQSDTALRALRTVRICGQLPLYNGQVHTATFRFLELTPELEHLSLSHVIIEAPHQGKSLMSNRKLLFFSAMDAQINGHMLRNMLSGQRLEVFQYRPGGHEFLRTHLKKFSEEHIVDCLMDSRQSLRELKLYSKQWSTSPLLSQFDNLEYMEMPFAANLFNVTEENDPSDIANVLCK…
>Alen_Al4_ctg01_-_Alen_Al4_ctg01g92t1	MRATTAILALAGTALAAPNWNKPEYKEVKNVHVVYETVVHTVLYTEGPEPPKPTPSSTSVYQAPVVTTVVYEENTPTPAPTSSKAVVYETEAPAPAPTSSKAAATSTAPAPSATASGYQAVVDTWRAKLGLKPLANDAKLESNAMDTVVSSNGKMVHKLNPGSFGQVLAPGNKDDFFNVFLGGWLCELPTLPGLDGICSTASDGWAYEGQTGHAEILTSDNYSKIGCALYAGIWCCDLA
>Alen_Al4_ctg01_-_Alen_Al4_ctg01g93t1	MLSKFILLSTALQAGLATAIGNAIVSNRCPYDIWLWSVDQGHSSAPMHVPARTKHSEPLRNACNGCGSSLKISKTDQLINGQHTQFEYSIVDGSVWYDISFVDCAKGESASDCPGHDKGLAMDSPEQACGKVHCAAGSYCPTQSYYVDTPKQKLGLEEPVYGCLGKGTDMDLYMKVCSDEAPLKRSITGRMILDDYA
>Alen_Al4_ctg01_-_Alen_Al4_ctg01g94t1	MSEFIGSRISLISKSDIRYVGTLVEINSEASTVSLDNVRSFGTEGRKGGKDEYPPSEVIYEQIVFRGSDVKDLRIEEQIKEKAPPAMPQDPAIIGVQQGQSRQDAPQDQQRQQQGPPNFPQQGQFPPGGYPPFGPGGPGPYGRGFPPQGGFPGGPGPFPGGPGGFGMPPYGPPPPGWFPPGQGFNGPPGPFPPNMPMGPPGFQNQNQPPAGPRGAAPVGTPAKDEQSPAQPKVAEADGSAKPAEPKVDAQQVGKAPAPTAAAKQPPPPPVESKPDVSAALAPPHTQPTQQGGAQKAQGGAKGGRIIPAVPIASPNVNKTAPRAQQQQAPAPAAQPQQPAGSAAQQNNATQLATAAVAEAMAKLNMQNRGQAQAPVSDPLNNLAQKVEGMREREQHARQP…
>Alen_Al4_ctg01_-_Alen_Al4_ctg01g95t1	MSAAGAETGASEAPHDTYEALERYNWDDDVEFQAGLSAILGSNSSPEQAAELALRARCFYYARKYNTAVDFEAYKAYRDAHGRPPPQTNGVQPLDFTETTYDAPSGVMPASTDPNEPPAPYPTSFAHIVELITSGQPIPGIKEIPNTVLEGQGTQPEKPKRRKPWEKDPPAVAGQEGA
>Alen_Al4_ctg01_-_Alen_Al4_ctg01g96t1	MQVDYGDGSDSNHSLHLTANYEHAGFRHPPAGVPAIDPGLEQSTGANHNGHAPMSIISHAAPSHLLQPDNASLSSAHLTHGFYGDMARSSQPSTASNASPRYSAAVTPASQSKHPAPSYTPDDRALPPQDVADDTIDNAFAGFVLYCNPSFALSTDTSELVKLFRTPPKSDGNAFSTWTLFELIGKFSTGEIKTWTQLALDLGVSPPDTDKGQSTQKVQQYSVRLKRWMRAMHIDAFFEYLLDKQHPYYLQIPPPHDPFPEDGRDGVPLEEDLAIRALDPKFKPKRGRRKADDADEELEAEADTPARKRPQLDTSIPFGNALQSQSAYPTSAHPDHMGGFLTPHDPWTAASAITPASALNASHRLKQHDNLTPYSASPLSGGQQIRWRLNSQEPATPHP…
>Alen_Al4_ctg01_-_Alen_Al4_ctg01g97t1	MASEQRLRSRQAHAPGATYLTYTPNGKKLITAGVDNYCRVFTTGSDDEPITVDDCQENNAAVVAGNGFFITGSEDGTVSRYSLDGNKFEEILVRTTLPVRDVALSPDGNWIAVASDELSVNIVNTKDMTKVRILRDQPRAVKHVSFDKKGEHLAVSCTDGNIYVYSLDEDEPEMIKKVDGMIKSLETESESSSKVLWHPDGRAFATPTALRDVQVMSTNDWARQRVFKTGHTADITAAAWSPNGALLATTSNDLDLKLWDTKTQKLLKTFDDVKATILAMVWHPTENILSYTNNEGELFIHTDFVPEEHLSLLNKSTVSAPFFHDPAEGRAGVAPAPPANSTTRELPGRPRQRDGTPDSLDDLLGPDFRDDEARDDGDEDMEDFVVDDDGAGYAQAVNG…
>Alen_Al4_ctg01_-_Alen_Al4_ctg01g98t1	MLDEGHGRSRLRYRELSLAPSAINTLNLLRRQLPTTLDTPSPLLPTRSPRPAPSASAQKASSYTNSYSLHPSPSTMREVISLNVGQAGCQIANSCWELYCLEHGIQPDGYLTEERKAKNDDHGFSTFFSETGQGKYVPRTIYADLEPNVVDEVRTGTYRSLFHPEYMVTGKEDASNNYARGHYTVGKELIDQVLDKVRRVADNCSGLQGFLVFHSFGGGTGSGFGALLMERLSVDYGKKCKLEFCVYPAPQVATSVVEPYNSILTTHTTLEHSDCSFMVDNEAIYDICRRNLGIERPNYENLNRLIAQVVSSITASLRFDGSLNVDLNEFQTNLVPYPRIHFPLVAYAPVVSAAKAAHEANSVMEITNACFEPNNQMVKCDPRNGKYMATCLLYRGDVV…
>Alen_Al4_ctg01_-_Alen_Al4_ctg01g99t1	MRIAAALLCIVSQHAWTVNANVEKAIFLGPSPATLPDARPSIDDLRLHSLSNREPVLPTQLSVQFPSSTKPHGLESWYLLSDLETGRRYEVRICWPATSPTDFWLDTYSIAQVFDTPDLISSLASYSEQLAELELKSSLDTQRTLAGAQSILFLRVQAAASYYSTNRSLMEHPPPVDVDIILDPFLLNVLPRSLVPIAIYITAVAVAAWFVSGYAYRWLLSAAEEPRKKPHAD
>Alen_Al4_ctg01_-_Alen_Al4_ctg01g100t1	MASTAGGPPPPPSLPPPPGASSFDHLPAELLLEIWEYLDVNSSMQFALALFPTLRRHSLIPQLTLPTYMRIIRDNTQCGLSGGITELLARLPMELWLQIAELGNSRDNISLMFALAGQFFRFQGRASKATKTRLYIWSRRKQ
>Alen_Al4_ctg01_-_Alen_Al4_ctg01g101t1	MAKLDLTIPNLKLNDGASIPMLGYGTGTAWYKTGDESKIDQSIIDAVKMAIKLGYTHLDGAEMYKTEQELGTGIKESGVERGKLFVTGKVDKPNVHDIEGALQTSLKKLQLDYVDLYLIHQPWFAQTDEDIQKAWAQMEAIQAKGLAKSIGVSNYAPAHLKALLKTSKVIPACNQIEFHPYLQRTELLALHKQHGIATTAYGPLTAATKAAPGPLDDYFAALSKKYAVSAGEISLRWCIDQDVVPITTSSKEQRLSDYLRVATFKLTPKEIQEINKIGQQKHFRGFWQVKFEDSDRT
>Alen_Al4_ctg01_-_Alen_Al4_ctg01g102t1	MSGATAAKGKKQANKNAYRRAKKKAQRSETPSEAGDSARESESAEPESDTNNDVQAVKSADLVNVDDIANQYDLDNPLFEQYKDIFEKFRERTEEEVATKDEEKPEIYYSDNDDVSEEEDGTPKISKKQRKAMSKLSVAQLKSLVSKPELVEWTDVSSSDPQLLVAIKGAKNVIPVPTHWSLKREYLSSKRGIEKPPFALPKFIQETGIAEMRDAVLEKQAEMTMRQKQRERVQGKLGKLDIDYSKLYDAFFRRQTKPELTRYGEVYYEGKEFETNLVNLKPGELSEELREALGMAPGHPPPWLINMQRFGPSPSYPNMRIPGVNAPIPPGASWGFQPGQWGKPPTDDAGRPLFGGDLYGTSVLEEQQQPTHEGEPVERTTWGVLRAEGESEDEESDEE…
>Alen_Al4_ctg01_-_Alen_Al4_ctg01g103t1	MDRERERERDRRFVKPTAPDDRYSNTYRPRSPRPRSRSPGPRVDSYRVGRSPPRRSSPPLRRGSPPLRRGSPPPRRGSPPPRRGSPPPRRGSPPRRGLASADTYTPGGNSRPPRPRSRSPVFRRRSRSPRRDDNWRARPRSPPRRNFSPRRDDFRNDRARSPPRRDGYDSYTRSPRPRERSPPLRTREVSPARSRGIRSPVRASRYDEPRSRINSPRRTSPPPRDTRDFRRRSPSPRRDRADPYTADTWRSRRSPSARPAFTPNEPSGVQSAATSRRSSPRPTVHPSRAALVDDRPTREPMSAPRSPFRERETSRAPRDTFRERERERSPPRRRDASPVRDRSPPRRRDASPPRGPRGDRDREFAPPTGPSSARRNGDSDFSRAPPTGPSSRSYPSPAI…
>Alen_Al4_ctg01_-_Alen_Al4_ctg01g104t1	MVGKKEAPKVTPKAPPRGAARAKAAAAAAAAAAAADGSVQDAIASNGGPVGADGIAAEGQPPADLNPNASLSAEASRKRKAPLNTQAKDEFAALLEPFYYGKRLDEPINTARDKWNLLPAFLKVKGLVKQHVDSYNHFVDVELKKIIKANRFVRSDFDPKFLLEYTDIRVLSPNRQEEDDLDHHRSTITPNECRLRDMTYAAPIVVDIVYTRGNAKVKRTGIKIGRMPIMLKSNKCVLAAKNDREMAVMEECPLDPGGYFITRGQEKVILVQEQLNKNRVIVESAKGIMQASVTSSTHERRTKTYVIQKKGLMFLRHNTLSEEVPIVFALKALGVHSDKEILLMVAGDDSAYQDSFAINFEACAREGIHTQEKALEYIGHRVRLTKKPLGASRMRNYHL…
>Alen_Al4_ctg01_-_Alen_Al4_ctg01g105t1	MGLNALPNELLLEVCRYLSGDPASLSALARVSRKIQPCAFEVLMNNCTIDLSSGDTQIIHNVMAHLFSLAHNVTVPPPNVAIESTGSLLVDDLVKHASKFKTLKLCVADRHGITSTVSGPVLTKYMSAVQVLERATMYGAKSWKSKFTRGKMEDLLRFLLRVTRHIYTLEMESSLYWMGQTEMKGMCPALHTLKLVGITNKSLSRNCCYFVRLPTLRQLEFARMSLTHSTLLFLGTQLYVTTLRFVDCWVATMTLGKAIRACRTLETFEYSLSAEHCPQLNLTVHQYSLYDLISVLATNHKDTLKHLTILDLDAQVGDLCHEPDALSQFTVLKTLAINHDHLHPRRVDNAHATCSCYRLAYITPATVLLSLPPSLQKLELQVCNKTFITGTLLDVLQNM…
>Alen_Al4_ctg01_-_Alen_Al4_ctg01g106t1	MQTSKLLRPALSLRSTITQTPHLRAFATHLSSRPYSTDNTDRLKAPVSQKSQIPGMEAIKNTISENLGKIIPGNEMASQENQFSLDAVPDLTGKVAVVTGGSEGIGYGCTHTLLSKNIKKLFILSKADDISADAINAIKEEMGEDKASRVVWMKCDLSDWEETGRTAFKIAEQTDRLDILINNAARGIMTYQLAKNGVDLHMATNHFGHVVLTSHLLPILKDTAKKGDKVRIVCTSSNLHEQTPSDTQFASVDELNTDLGAQPQYGRSKLAALLYAKYLNRHLTSQHPNILANAIHPGIVETRQSTEHIHEAFPLGGYAMSVGLAPFKKTQFEGAVSTMYAATTTEKSGQYICPPATVEKGSDKANDVELGERLMDLTWKVVKEKTKSQSADKGCPFKES
>Alen_Al4_ctg01_-_Alen_Al4_ctg01g107t1	MTTGSLPLDVQATHKARIDNDIINLCGKPKPLYTIPTAHGVGLYTHVAGPKIAQRNPQSSYADRADGEVALLPLGGPHKIVPSKLREPPNKEIAAIYKQLRDAVQAEEKIWSDMRAAAETKGEAAKDAYKMNLDTLKKKYGDIDTSVSESAKLQLDRAKRDIRSLSEVTGEECVDVPKRRRVSLAEHLKARRQSTDVPVSGTDTHKERQGSASKAGNIYEAYRDPRRQGR
>Alen_Al4_ctg01_-_Alen_Al4_ctg01g108t1	MPAIIPPLDEQEYADPQMPLAHLDSDNNIIFYHMNSPFFEPNSNNSAVYSTAQGHPNGMQLLNDRPTYEAELRKYNSGLQFIVAGEPKAEGQPWLIQRQHKVENRETGNPETVVEGNYYTQGTRLLMAPSLLDVVQARLLTVSTRMQQMAELSKNMSHWSPATGHTYMPPSYEPVKAAAAGSRVGSPTLAPTDPDASASQSQTKDVTTAIDPAASTTQFSDDLFMHSLNLMHAYGDEYMDENPLLGEPGAFVFTNSKSHVDARNKAQEQASQASQASQPIIKTDTQPTSAAPSVVATPKGIATPMALDAPSRKGSVVGLPKEERRKRRKSKGLTSPTTPAGPAL
>Alen_Al4_ctg01_-_Alen_Al4_ctg01g109t1	MSPQLSSLDHSLTCTTQPPPWIYYRHGGRNEFKWEDVKNDAQRENYLGHSLMAPVGRWQQNRDLSWYAKGDTESKDTEAARIKEEKRKLKEAEEDAMLVAMGLPVPERNNANLTPLGERVHEADVKDAIGDKAKEGEDEEKARRRDKKERSRRHRDDGDRERRRRHRSRSRSQDRDRRHRNRDRSGSRDRRRDGDREREKRRHRSRSREHRRRDDRTELRRERKPDEERARSWSRSRERRRRRDSRSRSPYKAEKRRD
>Alen_Al4_ctg01_-_Alen_Al4_ctg01g110t1	MSNPEPAVEVADWKQLALSKRISVFKKIPQEWLLPIEQASKYTETNPISVLDVPRTCGILTPKELDITENYDATELVQQMASRKLTSVDVVTAFCKRAAIAHQTTNCLTEIMFSEALARAHECDSYLEKTGKPLGPLHGLPISLKDSFNVKGVQSTIGYVSFIAHPPATTNSAVVQILFDLGAVFYVKTNLPQTMMTADSHNNVFGRTLNPHNLSRTAGGSTGGEAALIAMKGSVLGVATDIAGSNRIPALCCGISSIKPTASRVPFAGGVPPGRLGSPGQILPVIGPCGRSIRDFELFLRTVVQTRPWLLDPMALNVPWQTADTGIKEKKLRFGLIRSTPSRPLHPPIARALHSAATSLKAAGHTIVLLDDKIGDMYADVELAWKYFMLDPSGAAFQH…
>Alen_Al4_ctg01_-_Alen_Al4_ctg01g111t1	MIKHTIISRLDGLILTASVDDGQEDAEFSEVKNKVKLVQRRLNRNSEPQASIESGSYTYHYLISGDLCFLCICDRSYPRKLAFTYLSDLSQEFTTIYQPQQYLSPSCRPYAFVEFDTFIQRTKKTYQDSRATQNLDKLNDELKDVTKVMTKNIEDLLYRGDSLERMGDISSRLREDSRKYKKAAVRINWELLLKQYGPIGGLAFIVIVFIWWRFF
>Alen_Al4_ctg01_-_Alen_Al4_ctg01g112t1	MEASNSDIVMAQLSSMSNGTNAAAGDSQAHDTVITHTDNQIALQQLTPSLSGDKTNMDWTAPETSSPPTAPGVLHALARSVATSPSVRQASSDPRQPHSDMDGDSLPELSKTTELDVPTAPATSDTKERTARQAAKRTRTESALDGVSPAPKKAVKRPRVEVVISVTKSPAKTKAPTKLDTNSKDHNAEEGGGSSVEHEIQTAAVSAESEVSFSRPKELSKIAPKKSTSISGRRRACDTCKRRKVKCKHKFAEDEVDDSSELKKETSSRKPTVKTPKVTKQSPIGERDEPVSFEASAPNAEVQREQMVDADDHSQDAEEELPKKTKAQKKAPPKKAAAPPGRISKRNRNPPERFGDPEERLPAKATPVKKSTSKVFDPVYITTNSTSRLGKADMYRMLL…
>Alen_Al4_ctg01_-_Alen_Al4_ctg01g113t1	MIGAVLKGTETIKSLRRRFTSTDTPDIDPTSPPPTYTNLSLKVCTTAQKVLINLFLFNAAASDLVRTCAKPQLLQRPAHFTDNDQLAVIAAFFPNPTTRQIGTIRTRRGGCVNMESAHSNAPAPSSADAPFMKLPEHVDGFVDVQTLIDIQKYLSESGQSDDVTLADWVKEQYLYEPVIEEGRQIRDTEGFVKLDAAYRRVRLLTGKAQDKWPFFHRNWKKMSSVVVKNAILGNAAMCTSRQITNGGVYNSPMSNGFDGQLDSRLHDSESQTPFGAKNPSRHQKPSQPAAPIPASQPKPEQQAQRQDLLFRDFSLSPTPETPSESRSGTKSGTTTHGNVWGVPTLDNVVDSAAAPANSSRDIRADKARGSQGRSLNNDKPSSTARKGPNIKYVKKPRSK…
>Alen_Al4_ctg01_-_Alen_Al4_ctg01g114t1	MRLYRSVIALLVATGAAEPIPRAVKAPTVDLGYAVYEGSFDGNNSINAFKGIRYAAPPVGKLRFAAPQTPAKNRTSILAATSDPPFCPQTGASSKTPAAYGFTSALGNEDCLFLNVYAPANAKNLPVFFWIHGGGYGLFSATGLDPTEFMKQNDNGFISVIIQYRLGAFGFLSSEDVKKSGALNAGLLDMNLALQWVQQYAKKFGGDPSRVTIAGESAGGAAVLYQSMAYGGKQKENLFQNVITASPWIPFQHKYNDDQPTKAYKDFVAAAGCSSSTDKLQCLRGADTVVVQNASAKVSEAGPFGTFAFLPVTDGSFVQQRPSQQLAARAVKGVRVLSGNMANEGVPLSPPTTRTLQDFRNYIETTFPDFSQSEKTAVEKQYSYAGDTKDVNAEAPLFA…
>Alen_Al4_ctg01_-_Alen_Al4_ctg01g115t1	MASPFTPAELANMHEGDSRVTEIRWVYSVPIASGIISTGLRLYSKHLGRNGIHLDDYLITIATVCLIGQCASGLGYGPPHGMGRHVIYVSEYDKIMVRKGDYVFSHFYDLALVTVKLGILAFYWRVFVHSIFRKIVLATAAFVIAWGIGITITLFLVCRPLNTYWDPDVKGTCLTIVTFTYFTNISNLISDIWIFLMPVPMIWHLQLQTKKKLLLSLIFFVGLATCVVSSLRLTVVLGHGNPNFTWYYVPLGAYSVFEPLGGILCTNLPIIWHMMRKRKSNLTRHTSASKISSSEGRMPTIGSTSRRNRLALALGFTSHDRTQNDSTIQTNSGNPTSAHGDWEQLQSIEHIVKPDPKIWTTVERIEDGNEGPSEPLPSGMKKTTWNVRR
>Alen_Al4_ctg01_-_Alen_Al4_ctg01g116t1	MPHALSPERGIPSFSGERLYVNDGLLRPEQVGALRQSTPDMSMEELRCRYNEDGYVYLKGLLPKEDVLKAREEYFNMLSPSGVLKPGTQPVEGIFDPEKNPANYPGIGAGAAGGNGRPGEDTAKNFVDLALQAHYADWYKEKFCKHPALKDFIARMTGWGEENTLPVRRSLLRNNTPGNKAIGVHYDQIFLRYGEPTSVTAWVPMGDVSLTGGGLIYLENGHTLGQEVEADFTAKAKASGLTDEEAKYAFNQNMLSTGLLADGAREYSDTFDRKWLVTSYEAGDVVLHTPFAIHASTMNYDPNNVIRVGTDLRFVDSSKPWDKRWDKDYSFNDGV
>Alen_Al4_ctg01_-_Alen_Al4_ctg01g117t1	MPPRIQFLDESNDIRSQYSDEVYYPFYSPPAAQSFSPQAHSSVSGGNNTGTPSTSVVTPTEGLTVLSLLNSESPAQSHSNAISPPFDHHAPSNTSHPDEARMFVYQQPPGEPVLWPLEHEQEAMLLRHYIENVALFFDMIDNECHFAVHVVQRAKKDSTLMNAILALSARQLSRTTDFDPYIADAYYQRCFDTLIPALNNNNIAIKDESLLAATIILRLLEEMNISIIGNDPQGHLFGTQAIIRAAEQSYAATNGPSFRQAIYWAAFRQELWISLMTQRAFQLHIFPADRSLEPASDPTWATRTIAHLGDVCNFAFGEDRHSVSRYGQLMDENRSWRTRRPDSFDPFYYRQDRDGSGRNFPDIRLHEKSHVMGTQYNTLAHMLLVVHDPTIPQLGPAHK…
>Alen_Al4_ctg01_-_Alen_Al4_ctg01g118t1	MPRILKFLRRRKEFRTKSTTIKKAALVAQATIAQDTYDKKAPESRIDDAIFSLEHYTPRPSPKTFVVGEVREMPNDNRPLRFSRSNHRETDHKVAITAKSGANTEARHDQHVNLPILFAESPSKIPDTDSSFTSINTKDSKTLANNVSAASRTRPAFKLLLGRQDPASPYFTRRYFHFSDLAAPHSPLDASNDTLHHISEFDPQAFEMYKIYLHTGRIPHAHTNNVDKFHLWMAYWPLMNAHSLGYIVEEPGFADRVMDVLAERLRPGTCPDVETIIHLFGENREGVSDALRQFIVDRFIDALETDRQFLNKFNMPASFSQTALRTTLQRLDGKLPVVQSGCEYHTHGTEEACYKTKITPAEALKEKKLAEARELSAKDAESAVANIIQNGVKSIDWER…
>Alen_Al4_ctg01_-_Alen_Al4_ctg01g119t1	MADPKNTANSRLTQITDFLTMNKTATTIPWDPNSTKFPTRNELPDIPGAPKEAAWVWGNDDYIGRLNLLTPTRVAAAAKEIRSGEIVPVNLPLNVPGQPAFGREPFKHEIKTLLEGVAYDDLYHLNTQSGTQWDGFRHFAHVPTGSFYNGTKGSDIAGPAANHKCSIHHWAEHGVAGRGILLDYRGYAHKKGINYDPYDYYPISWEELYQCGKDQGIDIRPAAQGGDIKIGDMLFVRSGWKEAYDSKSDDDRTKAATRHGPNGEDGSRYAGLSQEQKILDWLHDCYFATVGGDAPAFEAWPTHEDYHLHEYILALWGMPLGEMLDLEKLAQTCREKNRWTFFFTSAPANCPGGVSSHVNGTAIF
>Alen_Al4_ctg01_-_Alen_Al4_ctg01g120t1	MENNAAEIILTERRNEKRKSAPELREYRGIYWIRLVLRILSLFTCALISFSLVEAIKNFRKTEHVRNPFHEGSGSFPVWPEQEGLKLYPTYVLLGAALVAGVFSLVLVVASFTKIVRRMTKVGNISTIVVSLICLMLWVGVTGYYGTWDKSETNWDLLSWTCTHRDYEYKDVDFAETCDEMRFAFWAGVGLAGLEAVNLGIFVIWWLGREDTARPTNGITEPTKPTPHIPPDQVKITF
>Alen_Al4_ctg01_-_Alen_Al4_ctg01g121t1	MPLSPSPQEVASTLLAEKGLDLLSISLLQSLWAGYGQICHVTAADGLAPEFLASLPEGPRKSLLEGHKAEIEKLRESSKLKLSDSRPENTHSFVLKLITPPPTRAGDEGHTRKILSYQVEQYFYSHLAPQLPASVPVAKCLASINEHHSDGTSTTAMILRDLKQDFPVAGEKRGSLSRTQVKAALDWLSGFHGFWWPRVEDFDRTKLVLPPLEEVLRDGQDAAEKTVWLNGGYTYLATRRKEYGSLVNDDDSEWKEALTELSEGQSRSISEMVAAFLAPSVSDQSPIEHYQTLIHGDVKSENLFTSESGEEVAFYDFQYTGLGLGVCDLAKLFTCSVPLSMLVIDDDIPHVLEMQNGEKKLLERYWNNLKDTSKKEYAWETFVQHWEVALVDWLRFQAS…
>Alen_Al4_ctg01_-_Alen_Al4_ctg01g122t1	MKAFVVRSLLASFAAGLAAASSGAVSYAGYQVLRVNTLGHLAEVQKKLSTISYQQWEDTDTHIDIVVSADQFEKLQSLGLKYRTLHKDLGDSIEKEGQQKAYRKRDIDDLSWYDSYSPYADHLQYIADLHAAFPNNSKLVSSGRSYENRTIQGIHLYGDEGPGKPAVLYHGNVHAREWITSKTVEYLTLQLINAHKNATDTTQSVLNQYDFHIFPIVNPDGFVYSQEKDRLWRKTRTPPPPGQNQTCYGTDINRNWEYGWDANALGASKNACELTYRGQKPSDTIENQGLDAYVRKLRDTVGIKLYIDWHSYGQYILSPFGAKEERYAPELGKWTKTASILSETIRDSSDRRTTFTFGPSGATLYTNTGAAPDHLYAIGGAGFSYTIELPDTGDYGFVL…
>Alen_Al4_ctg01_-_Alen_Al4_ctg01g123t1	MKLTLLTPLALAALASTSPTTPLEKRAVTCLKTGATATATWKNSAGQTCRWTGTVGSNFGTNSVTGGDYSCNGRCGAGCSGTALGSAYTQDCFSHDVCSWFNNASGGARYVLKIRSNTLLRLTASRDANCGAAYDAAVDDTLLGAATGCGQTNPSNAASRPSTNPTCS
>Alen_Al4_ctg01_-_Alen_Al4_ctg01g124t1	MKRFAQRFACQRSVTHLLRTSGLSPRVKDTHATKNPLTPYPLPAASHWQRHCRHSSSRADPIYEARFHDVLAKEEERRHDKDMGDAKSVTSNTSSGKRKRSAGPTFYAVKVGHTPGVYYSWRDCEAQSKGIKSEYRKFDTLTEAEAFVKSGHKSAAKPGKAKFYGVAIGHVPGVYADWPSTQAQIKGCSGGLQQSFATREEAQAFVNEHRRDHSVPISLRGDLSEASSAVGQGCRASESVLKKQKKNNGLAAAAVPNGNVTYEPGMGPLPDGAEDGFDRTLKMDLESGAIRHKTESELGAMKMQPTGDFTGQVVVYTDGSSLGNGRTGAVAGVGVYFGPNDKRNVSEPLRGSKQTNQRAELTAIARALDHVPIDRDILICTDSYYSIRCITEWSPRWLR…
>Alen_Al4_ctg01_-_Alen_Al4_ctg01g125t1	MFEGRHIADQYHLRLHRARSVVLTPAEMVEIRAAQRTFEGAYIRTAIGQFSFALIVLKIFTAEFYSIGALFAVYGAGILFISLFRRQQGNKQFFSEVGEDGLHRKKFRTSGNVTKCRNRNAATSSSAPTLLSLQQPSYLDSPHQPALHLRPKRSHEQPQPQPGTRAVHHPDQQQRRPSPRSTPAPPAIPSAGPPKSVQAIKDLAAQRGELRPPPASATAAHHLTHNHATLKDGVGVALSDTPAPSQPGSPKGALTRNSSAASTPRIRPTTLDIPGLTKSKVSPDGKIAQRDVGSKLVIVMVGLPARGKSYITKKMTRYLNWLQHDTKIFNVGEKRRVAASGHSFRLSQQSLERVPSGVRNALEQHQDSLPQIAANILINGDSAAADNREMAPLNLKDPP…
>Alen_Al4_ctg01_-_Alen_Al4_ctg01g126t1	MDQLTPEELAALATEDRGPLCKQIVIAFTVISFVSVCLRLFARIKYHKTGWEDWTIVLSTIFSIGTGVLQVLQVEAGNGKHAVFVPYPEGVSTVLEYLYFSIVTYNISLTITKISILLQYYRIFTLREMRIPIYVALAVVVDAYWKVTEQGSATCVNRMALWYTNASVNIVTDILVAVIPVPGIWGLHIPRRQKIALLGILTIGWFVCIVSVLRLWVLSVFARHQDDATYYSAPTAYWSSIESNLAIVCASLPALKPLIVRIVPVFGTRSSSTRGRGSTAMSGNNHKLHKLKSRETWKFAGDQEKLTSESSASRGQSFVSGPSESEQRGKSIYVTKHFEQHIEDCKGPGYNDSQQEVTAAEFLAHRNA
>Alen_Al4_ctg01_-_Alen_Al4_ctg01g127t1	MALMRQFFSTAALCLLAGQTALAAPLLNAQDLAVDLGYGVYQGAHNSTTQLNVWKGIRYAAPPTGDLRWQAPAAPAVSRNGTVNATVFAPSCPQALPAPFPSVPSPSGSEDCLFLNVYAPNYEEGKKLPVLVWIHGGGYGAGNGQQDMSEIINANSNSFVAVSIQYRLGAFGFLSSAEVEQNGVLNAGILDMAFALRWVQDHVGQFGGDVSRITISGESAGAGGVMLLGIAQNGTLGTSLFSGIVAASPYLPPQYDFDASIPTQKYQSFASRAGCANSTETLACLRSKDSTTLQSANSAENTASFYGNWAFLPVTEPETGFITTLPSDSLAAKRVNGQHVLVGNNANEGALFVPPTINSTSALQTWLQGAYPSLTPSDLEQILAAYPTSNSTSTEKFAT…
>Alen_Al4_ctg01_-_Alen_Al4_ctg01g128t1	MAEELSKNFETLQLHAGQVPDPTTNSRAVPIYATTSFTFNDSAHAARLFGLKEFGNIYSRIGNPTVSTFEQRIAALEGGVAALATSSGQAAQFIAISALAHAGDNIISTTNLYGGTYNQFKVFFPRLGIQTKFVNGDKPEDFKAAIDDKTKAIYLESIGNPRYNVPDFEAIVAVAHEAGIPVVVDNTFGAGGFFVRPIDHGADIVVHSATKWIGGHGTTIGGVIVDSGKFPWDKHSTRFPQFNDPSEGYHGLKFWDTFGALSFIIRARVEIQRDLGAALNPFAAQQLLLGVETLSLRCERHASNALALAKWLERNENVTWVSYPGLASHASHATAKKYLVRGFGGVLSFGVKGGKDAGSQVVDGFRLISNVANVGDSKTLAIHPWTTTHEQLSDEEKEA…
>Alen_Al4_ctg01_-_Alen_Al4_ctg01g129t1	MDIGAEQQQQQQQLEARQLPSFSDGACMSQALQRWRSVFSVQRSAPSTQHPALGTLHSLLSEPAFCFLVLVLVTSAASLAHDTATSTGERPQRHPRTLQRVRCTQLSSRTLPSSLHCLCCCTTPTRHHFHHFHHFHHFHHFHHFHHFHHFHHFHHVNHFHHFHHFHHVNHVNHVNHVNHVNHVNHVNHVNHVNHVNHVNHVNHSVLSSPTPALPAHCFQLVCFFPHPSHPPTMSLSVIPVSNETKNTSHRQTKDGRRIRYDLQVIQQPERARACGSGAKSSADRRPVDPPPIVELRIFENDQDVTFAYNANFFLHASLENARPLAAGRAAPSISSSPVLTGTPVAGMAYLDRPTPAGYFIFPDLSVRHEGKYRLSFALLENLSEVKDLDPDDPNVIHDG…
>Alen_Al4_ctg01_-_Alen_Al4_ctg01g130t1	MSSTPNLLLHCLLYLPLLLLLLPPIYFTLYFTLYFTLYFTLYFTLYFTLYFTLYFTLYFTLYFTLYFTLYFTLYFTLYFTLYFTLYFTLYFTLYFYFTLFFLLYLPLLFTLYFPLLYFHLPPTNPSIHAPLLLLATSYLFAEVFCAVFASL
>Alen_Al4_ctg01_-_Alen_Al4_ctg01g131t1	MDGNKHDQLEQRDAALQQSDQLRTQQQPHDSYQPQQLSNLQPQYPQYACLEPAAQRSFRTVQTPQRYMEALPYVNAYGNESDQQTGYRIPQPATSSLPPWPAPNYYYPPFVMGQWQMSFTSWPHGYPLNESQGGGAHGYWQAQQAQPQYTWQGYQIGWPGQQMNSNLTQDNSAVHNSYLSSAGVPFDLNSNNSQVQVAHKPTESHNNYQPTYTGPRSGLHKAFYGAYEPLTKEYDISDRPPYAKQKAAADPASKNRPSYSNVIDVDERSKTALVRYSPEPSIPRARPYRGRREDEYLQWDEQYGFGFAVSPPKDHPLRATRSRPAVDRGKYVSNHSGERRSEHISPTSSLFSARGHGEHSQQQDKSPREGRGRASERSWEPAILTVYDGSPSRQSVLPK…
>Alen_Al4_ctg01_-_Alen_Al4_ctg01g132t1	MSRSDDPGHYFQTTSALNETARKAAKSKNDRGAPFRLPSKILAVVPDPQDEQQIYVAEAAGNVKRIHLETKKVSATFTGPVAPLTSLAVSPRSNTVYAGCWDKSVWSWTLSTQKLAKRFQGHSDFVKAVLPFRLQDKELLVSASADATIIVWDAATGNKLHTLKGHTRGILALALDFTDYELNKDSATVFSAGSDRELRRWTIGFASASEMESSPIIAHETSIDAVHFDSDGDLWTASADKTAKCLSRGRSWEQDSAFEHPDFVRDVAVDEEGGWVATACRDEEVRVWDKSSGKLHHTFSGHFEEVTGLVLLPGQRLVSVSIDATVRQWSLKAQELAKAVKEAEDEQLGKTKEKELEKKEGMMTAEEEAELAELMGDSD
>Alen_Al4_ctg01_-_Alen_Al4_ctg01g133t1	MAGQGPEFAALSASAFAAAAFCCSLTHPAATTNGSPAHPPTSSARSQPALLHHNRPRPRPRPRRHLPTHSAMAAPNRSFAGRIASMNSMVSGIENWDDADFEDGDGLLFKNSTVHSLSSRLSVRSESNTGDDDWQVLLTPDDDLSTHKAIFSAKQAGIPIPTSVPASALLGGSIKRLGKPRTSKKMDLDDDWGNDLELPDTTAGGQLKLKAPVPRAPADDHDDFDDWGEGSLGIRFAGTKRDPRGGRSSSASAMSPSLGSCMTLESEDDDLTGLILPTEPLDFNARLTKLKAAEQPSLGAEHPSLGAEHPPLAPSPFPNQQQHHQHQHQHQHHHHQHQHHHHLQLQLQLQPQRDLPPTSVPAVAPGLPADEDVPPPAEHPVHHEPAEDDFEADFDLPAT…
>Alen_Al4_ctg01_-_Alen_Al4_ctg01g134t1	MHRHIVPVEPASGRGEIVVIEVQQHGAHQLDVRLVACEGESPYVVNIKQSELPTWQHKFKGTNAEWEAVLAHFLLQKQLAPDQANVWNGVRMVYTLNKHDLQVSIRQDVQGIKVTLGEIVLPKDDEFEFNPFEWAQASAQAHSQTLQELAQVKTRIDSEKDTIAELHAQLDDFIKTKNEAETAMLQQFMELLNEKKRKIRDQSRLLAGAKVDKSTALAIQSARTETPRKAGPSRSSKRKAPARAAKVVHEQDSDSDQMEIEEAKTEEQHDDEDVSRPATPDRGSDVETESEDDASDSGLRVTAESTSTVAQPTGEAAPLRDGPPPPRALPFGRAGTRSQGLAKRAPAPLPTSDDDDDDDDETEEEEL
>Alen_Al4_ctg01_-_Alen_Al4_ctg01g135t1	MSGPEPPDAPTTRSLKRSHFSKDDQDELEELDNIFKRTKTVVPPNPYILSTPSMDPYRYHSQQEANAWMLGRLWRHDEEHMQYRTYLYREPCQDCFELQAGEDDEPEPEPQPERPRSQASQTSNTVSQAPKKKISLSAYKNKQANGVLTPTPGSKLASPSSLPSKPPPAHTNGVKKTEKPPHAAQKTAEAKSQKPSTTEVHTERKPQKDSQRSNHSQLPPRPPAPPTKHMDAEDSRSIDKSSPSNSTPHGLPPMLSPVHEPLSNPYGLPSILSPTLPSAIQAELDRLEQQRSRAVSSASASSTEPKSQTLSVPKDKERPQLAGKTVKTEQRIRSVSVSGKSPYMAPPATAEDKAPSLIVKLKFSKAKAATVKQVLRLPPKRALPEKKERQEPPKESPIK…
>Alen_Al4_ctg01_-_Alen_Al4_ctg01g136t1	MAYLLRTAGRARSSVVAAKVAPTVLRRRYASAAAAAAVSSDHSEQAFFPGEPSQPILKTQIPGPKSKAAIERLSNVTDTRSLNMMADYTRSNGNYIADLDGNVLLDVYAQIASIPVGYNNPNLHRAATSPEMISAIINRPALGNFPQHDWADILETGILSVAPKGLNQVFTAQAGSDANELAYKAAFMWKRQQERGGADADFSAEDMHSSMNNQAPGAPDMSIMSFKKGFHGRLFGSLSTTRSKPIHKLDIPAFDWPQAPFPALKYPLDQFVSENAAEEKRCLDETERLIKEFPKPVAAVVVEPVQSEGGDNHASPAFFQGLRDITARNNVMFIVDEVQTGVGATGKFWAHDHWNLSTPPDMVTFSKKAQTAGYYFGNNALRPNKPYRQFNTWMGDPAR…
>Alen_Al4_ctg01_-_Alen_Al4_ctg01g137t1	MTAAQTLTRAAALRRVLGQSGRRYLVDRILQDKPGNQGRVYLATSGDHKYVLKSVAPRDFSYFKYMFDDLRSSPYLRVSDDACPDESVFVYKYLQDHLLSFVQNEVPLPLTKRILRDSLRGIAALHSKGIVHTDIKANNILIEWKDQGGEMTVEQVQVADIEDAAYVPKDCVIKGRQVGNWMWRSPEAHASAEVHMPSDIFSFGLVCIYAITKRVVLAVDEEEIPEGIELLDLVLERQLSYFSDLEGIDGLIRYLGDSPWAQLIAMVAADFNADNPRRPFALWQDIDPNFKDLIIRMMNVDPTRRLTANEALAHEWFSDVP
>Alen_Al4_ctg01_-_Alen_Al4_ctg01g138t1	MMYWRLLDCLSAKSQSLSLATIKDNALVAAVGANKDVEVRKLLEDNANAASNTPFFGEPLATAASSGSLPMVDLLLTYWDWETFEHLAGLRLMNAIEVAASTGHNCVLVKLLNYKDRIARSTYDDAVIRMTRSSHAASVELLLDCRRADLTLAAKKEFWFRLLRTAAECNQQALLQAILPNAQSDIGEASLVTAMDDACLENHGQTFKIIMSHLSITDPTPYADSLFWAARYNDIDVMKRILSFLQHDKRALLLALAGAASARASEAVLFLLGVAGISLIIEDVPKRFTDIARLLLPNAFNYVATQPAEPPSLSTYVEKLRAATKAGSLSDVITVSQSMKAHHPTDSLVRISSAFSDAAKAKRLDVLVFLCENWTPHLVTSCVKSPAVAQIFMNFGWDI…
>Alen_Al4_ctg01_-_Alen_Al4_ctg01g139t1	MSYAALPPSPRLEQNHDDQNIADRETRYSSGLSPLDRPSRHSFLGSSTERASIDSEGHSVSTQRDTDPIVPAIHPGSHLLQDADDHRPHYDPSNATAAVFPTSTSAGSGLHATGTQASLEMQDLDQSNELKLTRPRTSLGQLMQTWRWEIFTWVLGTVGYLSNLILVCISDGMLQKNWHSRIQITAFVAALAQVSQSALLVPTASSIAQLKWKWVLTASRPAQDIDRFDLASRGPDGSMRLLWYFALKQNLASLGALATILLLAFPTFVQQAVQIGTTNFQNTGAEFASLPRATQYLSDGDLGGSNNAFFDQARLDTWFRSDYMDVYLKSAVEAGLLAADVTPDDVASHCGTEACSWEPYHTLAICSGVEDADHMLSFEDGAVPRVPLGGDDIPQGRKK…
>Alen_Al4_ctg01_-_Alen_Al4_ctg01g140t1	MEIGNPKQVLSFLPCAAHFDTYVYGTNITCDIPRIDSSAACMTSHGGYYNQSLSSSASRGDPLKHVSEDIAKRWAKDHVTLGDNTSLQTFDFSLPDAQLHGLQPQAEIGVGANSTFIAALKDAGTVSSRSYSLFWGDEFTEQHRDGSVVFGGYDKAIIGDSRVTKAFNRSDPDCPQGMMVRLTAIHLSSESGTVANIFDGLEPLDACLEFTMRNIMALPFNYGDRIIKGMGAERADEHNNGRYGGVLANTAVVTPNSATFKGNLSITVEGAVTINFTTEQLLFNDHFIDSSGLVQTNTNLTNVPLLIEYPARKSRLGGMFFSSAYLMVNHDKDEFTIAEARAAQGQPDIVGIDTANDCVAWLNGTTLSEEPSTPAAPTPTPDSDAKKLSTGTIAGIAIG…
>Alen_Al4_ctg01_-_Alen_Al4_ctg01g141t1	MDKDPAFITTTVPGYHDRLHEKRNNPECDNGQPAPSNEGVFQRYINQLAINNFGFTLQVAWEAVGLSFQLAWLNGGPAALVYGSFIAGIGSVLVATALGEMASMDPTVGAQYRWSARFAPFAPEFWGFIQGWITVIAWICSCAGAFSFMSNTLSGLIIFNSPNYEPKAWHPTVFLIAFLIVPLILNLYLRKIINYLETIGGILHVVFFVGIITTLCTLAERSTPEFVFKTLHTDAGWNNPGVAFSIGMLATAYPISSFDGVLHMIEETKEPRKRVPKAMILATSLNAIMMIAFCVCLMFTIGDEEAVAKSILPITEVFYSATKSKTAATAMTVMMGFVLMIGNFNIVASVARLVWRFASDKGLPFHQHFTYIHPTLQVPIPALFLVGFICCLLSLINLG…
>Alen_Al4_ctg01_-_Alen_Al4_ctg01g142t1	MAVDKINTSLSANDARILNALFDPETLPSSVAKSKDASAIDDLLPPHPTISSSQLSILETQQNEIIQQTSSDSSIEAIDSAIRSLNDITTSNPTYPSAFVNRAMLQRLKIEASLPPDHHIFSVPEPDIEAIFTDLARAIHLSLPTYAQAAPVSSYQARMLRTAYSHRAFLYLKASETGTELGGLGKSDLEELSSKDFAAAARYGDEAAREMSVRTNPYAKMCGAIVKNALREERKGEMA
>Alen_Al4_ctg01_-_Alen_Al4_ctg01g143t1	MAPAAISPPGSPVPSATSSSDFASYRGYHHVHWYVGNAKQAASFYVSRMGFERVAYRGLETGSRAIASHVVRNGNVTFILTSPLRCLEQSHRFSEEDARQLKEMHEHQERHGDAVKDVAFEVDNVDAIYNAAVSAGGVSIAEPHDISDSHGTIRLATIRTYGDTTHTLIQKSTYNGIFLPGYRAETKSIDSLNRFLPSVQLEAIDHCVGNQDWDEMENACDYYEKVLGFHRFWSVDDKDICTEYSALKSIVMSSPNEVVKMPINEPAKGKKQSQIEEYVDFYGGPGVQHIALRTDNIIGVITNLKARGVEFIKVPETYYDSMKMRLKKAGLKLNEDFETLKGLDILIDFDEGGYLLQLFTKHLMDRPTVFIEIIQRNNFSGFGAGNFKSLFEAIEREQE…
>Alen_Al4_ctg01_-_Alen_Al4_ctg01g144t1	MKAIALIAAVCASVVLAEPEQIKPRALYTIETAPGQTVQITEEERWELSSSGGCGSHFFDITEFNAEVKAVKVPAPYPSKFKYEENIRRLFPKLKWDNIKRNLEKYATYHTRFSETVTGTQASEWLLSQVQDVVLKSKKQGVTAKAFPHALWPQKSIVVTVPGRSNRTVIVGAHLDSVNGANRLEARAPGVDDNASGSFLLLESLRVLLSDKDFGPSKLQNTIEFHWYAAEEGGLRGSQDIFTQYANAGRDVWAMLNQDMVGYTKATIDAGKPESFGLITDFTDATLNEYIGRIIDEYTDIERVNSVCGYACSDHGSATRNGYPASFIFEAAFEYRNPYIHTANDTIEHIDSKHVLQHGQLVLGFLYELGFSKSQ
>Alen_Al4_ctg01_-_Alen_Al4_ctg01g145t1	MPKFSRFYSATEAEALASISRLFPQSVERAPQSINSDAEQLSNMINGNVDFSPRPRNDINQPIFECTPPVQPVEQLLKLSGFSISYDTIHRDKMVRYASSSEGSREWKTRSRTPSSDEPFPSPSSSVKAETSGTSNGSPEDDLAQVIAPSPKKRENNWNLYPDYYATYPQDVLQGMDTQFSKFTYDLHEGSTAIPFVMAQAPAKTHAKLVAVDRKLWTSDDGHVVEDSVDNDAAAVFVLERFQKTDRQRATSNRRALQAKNDGSDHRHESHNDKPTSKRAALIARSQATKDSSLVIIRRQEQKTTPEPPIEQTKPTILILNQKEDDQRRDVDSALQNNGIDLDDTQQLQELMRKLGKAMTEQDKASEGQVVEKIEEVDLDGAADRASKVHRLKGKARKD…
>Alen_Al4_ctg01_-_Alen_Al4_ctg01g146t1	MATTQDPNAALGAQDANSTTKKRTHPEDFKRAYKACINCRQRKAKCILGTGPDGGELKPPCQRCKREMRECVFRSERSWVKRRKPGEARDEEDEETPSSRPQTQPPAPASAHVPTQPSPAQRSSFSGHGFTPVQSPYLNGHAHRSDILSPPAHFRRVSSSQPDLAHSVMRTVVSSGSDALNLLFEAANHRDAIDNQEANGSQAYETPRSGPSGGYDAGSPFHTFRAQPVQMSTPSPETLKIWTSCRFVQMGWFSAHEAVTYVDLFFKNCSPLSPILGDFYSHHENHYSLIALDPFLCVTILMISSRYNILPGVGGASRGYFVHDRLWEQCQRFIMKIMLGQVKPSKAQSRTIGSIEALLLLSEWHPRALHFPTAADGWDCELMIGANNTTAEGAKLLEG…
>Alen_Al4_ctg01_-_Alen_Al4_ctg01g147t1	MPAQQIFSAKALVGVWRNLRNPRDKNDFYLTLQYHQDDARASKGKKYGKTNVVETTSELEDGKAVDVGGKSISFVVPWRSMQAQRRELKEKEKELAEALVMLAGEVSFTDLSPTLQASLTQNPLVQIRHLAAGISRQMSKVELQMADNAPFSHGKNLYTGGEIARKFLPAIQTLFDQRPIPQRMIFELLMELKDLIYMGMADCNKEVLEWEIDGPAIGALEEMDDAFARAITPVPSAVEDGHLPARELEPGQKRVLRRKASSLSSITLSKPQQPFLTASTTELLYTLESLETTALALTHLPVPIPDFCAHSIITLRRFSPRQTLTEFSANKKRRSGRCAEYARCMKWASTSWRQGGGCRRGCKNEDEDPENLPSWHRSSRWFDGNGDGTHMVGGGRPEE…
>Alen_Al4_ctg01_-_Alen_Al4_ctg01g148t1	MGNKEEAIALKNKGNDAFKAHDWPTALEFYTKAIETYDKEPSFYTNRAQANLKVEAYGFAVADADKAIELDPNNVKAYYRRASANTLILKHRDALRDWKLVVKKAPNDATAKLRMVECEKIIKRDAFLKAIEVEDAPSVVEGLEIENMIVESGYDGAKLGDKMTPEFVEDMIERFKNGKKLAKKYAYQIIIAVMEISKKEPTMIEYDVDEGHEVTVCGDTHGQFFDLMNIFKLAGKPSEKHSFLFNGDFVDRGSWSTEIALLLYAYKWLYPDRFFLNRGNHETDDMNRMYGFEGECRAKYTERIFKLFSESFSLLPLATLIGKKYFVLHGGLFSDDKITLDDVRKLDRFKQRQPGQSGLMMEMLWTDPQTAPGRGPSKRGVGLQFGPDITKRFCENNGL…
>Alen_Al4_ctg01_-_Alen_Al4_ctg01g149t1	MANMIPGGAFVPPNQQRNLRACMVCSIVRTQAQFMSGGCPNCEDILELIGNPENVTDCTSAVFEGLITVADTSKSWVARYQRLEGYVPGVYATQVEGILPEEMVSAVEAAGINYVPRDGSEDQMIPKD
>Alen_Al4_ctg01_-_Alen_Al4_ctg01g150t1	MSLAHETAGMEKNHHDIPPTAQYPLTDHAKARPLSADGEDVGIVISEQNELRRDLKGRHMQMIAIGGAIGSGLFIGSAGSFTTGGPAAVIIGFTLIGIMMYLMMQALAELAVMYPINGAFTMYICRFIDPSWGFACGWQYAINWLTVLPFEISAACNIIHYWPGSDGISNAAWITPLLAALIAIQFFGVKGYGEVEYVLSIIKILACLGFMILGIIIDTGGVPTDNRGYIGNKYYNIPGVTSAGFRNGFHGFCGVFVNAAFAYTGTELTGLAAAETENPRKEIPKAAKQVIYRIILFYVVNLALVGLVVPVDNEALNSSAGSSSLHSPFVIAIQLAGIKVLPSIFNAVILIAVMSVANACTFGSTRTMQALAANGMGPKVTAYVDKQGRPVVVVVIQLL…
>Alen_Al4_ctg01_-_Alen_Al4_ctg01g151t1	MGMGDYSSGSVWYYAPSKAAPAIFIILFLISGVLHTYQTMFISPSVPQSIPTDRTSKHKSWRTTLLLPWAAILMVCGFATRLAGACDTSDLGILVASTVLIMSGPPVYALINYFILSRILYYMPYFAPMHPGRVATTFIGLDGVCEVLIGNGAWRMANSSLTDAQRQIGSNMVMASLCLQAALFVAFGILAALFHCKALRAGVLKKEFKIVLYVMYASATILTIRCIYRLVEYVLGWESSIYQDEVYFWIFEAVIMFVNTALLNTLHPGKRLPRSNGTFLARDGITERRGPGWDDDRPWPVTIFDPLDIWGLLRGKDNETKFWDMNDEELERCRLEKKANKRSAIAALLDPFRLWGERGYIGKHLTKKNGQ
>Alen_Al4_ctg01_-_Alen_Al4_ctg01g152t1	MSVVENAAPALGAPEDAPRQKQHEPTVMDGLSSSKVTVEYYDPSGVFPLVQEDLAARLPLRNLHWKAPTRPLRSIDSLHVDLVPSKETAQDVGTDSTSLAPPAQGVPNRTTEEMIRPQAKEKERRHQIPGLRRTPYLKVYLLRCDDSESYKGTARKQLREWMKDHTPPAQSSSVSTQENHDAYEWMIIHVVLPDTPAASQPRGSGSAATGEKEKSGATSVFKRASTTILEKIRADFNIASKSAPDRIAQVRLRKERVPPQMLPAAGSVATPSAAETQQEHDSAWSDVITKFKTLILSSFDLRVSQYEEDIRKNDAQRSFPGWNFNTFFVLKEGLARGFESAGLVDDALLGYDELSIGLDTVIRDQTDDGSALQMLGHSEDLYEQVVKVLEQSHENTSNS…
>Alen_Al4_ctg01_-_Alen_Al4_ctg01g153t1	MSKGESSKAAASKGVRENPNAAGGANYELPWVEKYRPVYLDDVVGNTETIERLKIIAKDGNMPHMIISGMPGIGKTTSILCLARQLLGDAYKEAVLELNASDERGIDVVRNRIKGFAQKKVTLPAGRQKLVILDEADSMTSGAQQALRRTMEIYSATTRFAFACNQSNKIIEPLQSRCAILRYARLTDAQVVRRIMQVCEAENVQYSDDGIAALVFSAEGDMRQAINNLQSTHAGFGFLNGDNVFKVVDSPHPIKVQAMIKACHEQRIDDAMTTLKELWDLGYSCHDIISTMFRVTKTIDTLSEHAKLEFIKEIGFTHMRILEGVQTLLQLSGCIAKLCKINMQPQLFVMPSK
>Alen_Al4_ctg01_-_Alen_Al4_ctg01g154t1	MKYSIFVAAQLVSSAAALKLAPRENPRVVGLDIQRRNVDNPIAHDQLRRRQKTVQQTLDNLETLYFANATLGTPEQTFRLHIDTGSSDLWVNAVNSKLCTERGNQCGDSGTYSANESSTYQFVNNAFNISYVDGSGASGDYATDTFRFGGQTITDMQFGIGYTSSSAEGILGIGYTINEVQVNRFGLDAYPNLPQKLKDDGTIRSVAYSLWLNDLDASTGSILFGGVDTDKFSGQLSTLPILQESGVYAEFIIALTDMGIGNNKTALFANSDVPVLLDSGSSLMYLPNNVATALYTQFNARYDSNQGAAFVDCSLANEEGSLEFGFSGVTISVPYNELVITAAVSRGQAVCFLGIAPAGNSMSVLGDTFLRSAYVVYDLSNNEISLAQTNFNATSSNVQ…
>Alen_Al4_ctg01_-_Alen_Al4_ctg01g155t1	MFGTTDPQLQRAQELHAPPPKGHPYSLPLAGTETDGKSAIYRHWRFTDKPLLDSLVPEINTPHEAFEASVARYPKNNCLGHRPYDPVTKKFGAYVWQNYEQISERRKNFGAGLVHLHRQAGVTAPKQFGVGLWCQNRPEWQITDLACMSQALYTVSIYDTLGPDTTEYIINHAELACVVTGMNHVTQLLKLKPRLPTLKIIVVLDPLSAGELPGESKGDLLNSLASELGVTIHYIRDVEALGEKQPLPINPPTPDDTVTINYTSGTTGNPKGVVLSHRNAHAATCTTMVLLGSGNDQVICSFLPLAHIYQRLGEHGALAAGSAIGYFHGNIVELVEDLQMLRPTIFSGVPRLYNRFGSKIKEATIEQSGIKGALSRHVVSTKLAAVNDKHNPTNTHMLY…
>Alen_Al4_ctg01_-_Alen_Al4_ctg01g156t1	MHVDANDALGSSILAIVGTLVSVALLSFSLRLYTRGRILRSLGTDDWLLLVAALCTIGVLVIAILLRANLEKQAWPFSADDDHTTSLLVWVFTLFHIVGVGFVKLSVALTILKFAPRNWHRHVSLGFICLTTVLTVLWLGSALLFGGPITVDWSSTSKPEAIWRLVSFINSVLDVATGVFVALLPVPVLGALLPDLPVILALLAVYAFAIVVVAAAIGRMYLLHTLLQNEDIAHPVRMDMLWSSIELTSAMLAASIFTLHPLASSVKLYLSKRRSKHLSPSPDLPPHRYPSQTYASTDTVIHRPNGPRLLSLRFHDAESNLDFDIETPNTRTRTQTLRSRGTHSRNVSDWSQFSGFTYYTTTANSLHEASPRRSRVVSMNEMELRTKTIGVGRAGEGNA…
>Alen_Al4_ctg01_-_Alen_Al4_ctg01g157t1	MSETAIMRVNDFRTKRRIPLKHSLLFNKAKHSEDWHREIDATAGVLHPSDPKFPHALLRQATDVYLKKKGKIAQADTDIRLAILIGAHEARDIAIAAAARAMTASSLRATLQVDLNVAHGSYWGLNTWLQCLIAANHGNPASVTDLEASWARHLLPFATYGSSAAGKILVGVSRALRECATPNMNTVPDFLTLTSRALTDYAAHLESLRLKNDWLAAHKASYWMAELGRTSPPTTPPGFLLPEHVLDAQFPIWRVWARWRPDVKRITLLSNMDSNSAATLPDLLALEGPDFISGTEFTMRNGLVEQYRSGRSCVKLGRLLIEVPSRTKDSLRSLLESASSTLGTTWTAALAGRPQILSLFIGLVVNRPMTQEALNLIQAVLHIQESIEPDVLVTICHTH…
>Alen_Al4_ctg01_-_Alen_Al4_ctg01g158t1	MRASLPVLASLASVTTAARFLLQVPTTHVVNPSALSSTTHATLQSSGPPLDAYLTRSNTFNFNNVSAGSYLATVHCRDYAFEPLRIDVSVEEPVEGSGEKKEVIRAWQTFLGNEWDNKGESRGEGGNGLVVEARPVGQKEFYQERAGFSPLSFLKNPMILMAVFSGLLMFGMPKLMENMDPEMKAEMEEMQKNGVLGSGTTNTAQQIQNFDLASWMAGKTTDSGANSRGQSPAPEKQTLKKR
>Alen_Al4_ctg01_-_Alen_Al4_ctg01g159t1	MAELVASIIGIVSAGTKVALVLSQLAADIGSAGHEARMMGGEIRSFCAVLKTLGETMEKIDKSPYYAHCSEMIKDMTAASLEMFTEILNATESLKSLTAGRDGKDGNFGIVTRVQWTVFKKPKLLILRAAIEAYKSNLSLMLGTISTAEKVARRNSSRDAPKNFAEDAQDRSLLASLELDRKASLLDLAQAERQYEETIAQIPSLLSDEASAVVGSTDELLDDAVSPDVESNNDSLVESVRKEIESIRSSLAGNATFNDSVIQSQVTRHSQRVSKMLEHDQTRLSQRWSQNFPTGTAVAMISTSIAESRTGSSSNHAELASSVLVSPSPSSLHDVSTMAPTAQDTHSIKTPLPALDPRAINHYASFLSSLLLLDLSERQTVLRALEQDVLAESHATTTL…
>Alen_Al4_ctg01_-_Alen_Al4_ctg01g160t1	MAATRAFTPRLPTEVERMIFSCLPNTDLKNVRLSNKQWSASAAMILWKELTIDLIDSNTRNVVTILDSNSNGILDNLKNLSISTCKGFLSQPLQQQVNISLLVLLGTLKRDCLNAFISSEYALSKYELGILLRNQTQIKKLAVSLTTDKGGPPGENYIKGALLVLEELFIKTSGTEHHAYQGYFHWFAHTPNLRKLCIEGKVRSATACFDAWALPDQTPLLKLHTLELSHVQLYDLPRNIVDCLHVPSLQFLEISECENVSSLLGSFTAAFNKTSDIFLEYLSISSSESAEDLSGSLEGFLEAIAGVSTIRLAFTSGNLPGPRSLIRCGPTLKSLRISHRDPECLYTPQELQQLVESCPNLVWIALDLVNLSDTIDAMPPFAHLHVSTSANSGAILHAL…
>Alen_Al4_ctg01_-_Alen_Al4_ctg01g161t1	MPTTTTRHRPRRLDLSNHNIVHSSGALTARPSGPGSANVMDMGLACLSPGFHTQDPTMRSQLQRSLDVRERQRQIIEARQKTGGKGPAVDEEPPRSTEVGAFGRPIKTPQTSRRKGPPPGLSIAPPAHQTFANDRIIQSAPINQTFTGLRSNAPLSRQLVNGPSGLSQTSHIHHVPAQQTNNRLPPISDVFPEPLHTTRNHYSPGHSSHSNQQPPLPSPGFAAPHSVPPPLTSRPREYKSAEEAVQSLSGGREDLLPRLVHYGGHQPPTPPSPMPKNGQSAYPAHSDLHRSGSSRRRGRDEYERDAGTPPLGRQAPRIGPFGEGRDSPETQQKKKEEFIGLCARAWDLFHS
>Alen_Al4_ctg01_-_Alen_Al4_ctg01g162t1	MTTVVANSPIPVQYAAPAPADGVGSSRTYDAIAPSTLSPHNLTPTSKHSKLPDHNASPTSSSSDAAMQQQRAEGKRSPLSYVVQSFLSFSFDASPSPFFLFSHLDLPVAAATRCTQSNV
>Alen_Al4_ctg01_-_Alen_Al4_ctg01g163t1	MSGAHEKPLNELLSRSMVDIYVGEENTHWILHEKLLCHHSPFFRKIFYAKGSNTQTFGLPEDDDNAFKTFVGWLYSSSLPVPREESDLGVLFELYLMAEKFQIPNLIADVLQVVREWYKFSDSYPGLRRVQYIYANTENGSPMRHMLVHSIARMMVLEKGLPAHWDKALRKNGQLAVDIICAIQDWRLDEDVVPDARDDPAEGEDLIDVDEEIKQNDAELEQNADIEDNASESVDGPEGEEAEGEEQEQEADDKDNDDAEETDDTVVGSPTQSKHDISKDQKATNGTQNKVDDLKKDFSKFSLNVVPNGLTNGDFGTLKA
>Alen_Al4_ctg01_-_Alen_Al4_ctg01g164t1	MPPLSSKLDRKLRAADESSDESENYEVTDRSSSESVLEFGAGEVVGSDSGDENANGSEDEEMSDASEDDQVQAQMSKVSFGALAKAQDALSKSTDRKRKRGDDSSKSQEDKLEALRERLRQIKAAKLANGEAKPSKKSKFDEKSRTKHQEPDENEVGEGDSDSDAAPHARSSKHAPAVQSSKRMVSRKRNVVDVKKPVFRDPRFENIGGPRPDENTVSRRYAFLSDYKASEIADLKKAIKKSRNGDEKEQMRKQLESMESQQKTQQRKDEQQAVVREHKKKEKELVKDGKQPFYLKKSEQKKLALIDRFQNMKSKQRDRTIERRRKKVTSKERRNMPAERRAA
>Alen_Al4_ctg01_-_Alen_Al4_ctg01g165t1	MSVETERYIPHDAAVAEPNTNPHKAAVGCHDSASPLHTHSQPPVAAMNNNFNPWAQPFTPNYGYPGQLQNQNRNRNRNQWQTPPQGYMPPAPVASAPWNANHAQSHQYYPNGQQTYNNSATQQAQAQAYYYQWAQYYGYTQGFTPVNAPSQTFGQQAPGPYPFFAPSFAAVQPYPGLHGVSNNDLQYAFDKLYKGIKARSRRTNVNRRASTPTSDDEPIQAVTDNPARVKEYDSLRRVDLSSRINKSYREPVAYPTTKPTGRSKDPKIMLPAPAPTEAYMAQAAGEPSTVALSGRILVILDLNGTLLYRPNRNKKTMIARPFLIPFLRYLFSNFAVMVWSSARPENVASLVEQSLEEDLRKTLVAQWSRGEFNLKPEHYNQNVQVYKNLDLVWNREEIQ…
>Alen_Al4_ctg01_-_Alen_Al4_ctg01g166t1	MATVEEQQSLLVPVVEDAEADGKHDEVILDFEAGDPENPREWDSKFKGLIVFLLAFMAFTVTFTCIGVVPIAANIVDELEGKHASTSTSALLVTIWELGEAAGPLLIAPLSEVFGRYPVMNGCNIVFIIATLFTAVSKSTKLLISARWLTGFAVASNVLNPSIIGDIFESDQRGSAMSLISLAPLIGGAIGPAIAGAIAQTLGWRQVLFMAAGLAVVAEILFLTCFRETYKMAILHQRIARIKRESGEFKEEVAKTKSKHEDLLKIWHALTRPFAVLFGSGVLMALSLQASISFSFFYVMSISLPLILQETYNFNPAETGAAFIIFSIGSLMSVVLCNFSLDRIYISLRNRSSTPDVGKPEYRLPLAVLGAVLLPFSVTAYGWIAQYRLPVPLLLASVA…
>Alen_Al4_ctg01_-_Alen_Al4_ctg01g167t1	MGGQKTAILSVYDKTGLLDLAKGLHEANVRLLASGGTAKMIRQANFPVEDVSAITKAPEMLGGRVKTLHPAVHGGILARNLDSDDSDLSANSIDKIDFVVCNLYPFSETVARINVTIPEAVEEIDIGGVTLLRAAAKNHARVTIISDPNDYHDLLTELKTNNGEVSEKNRQRYALKAFEQTSAYDSAISEFFRKKYAGDGDQFLPLRYGANPHQKPATVSMPDKPLPFKVLCGSPGYINLLDALNAWPLVQELSKALNYPAAASFKHVSPAGAAIGVPLSAEERQVYMVDDIAGIESSGLAQAYARARGADRMSSFGDMIALSHEVDLPTAKIISREVSDGVIAPGYTAEALEILKKKKGGKYLVLQMDDDYVPSTEETRTVYGITLKQHRNDAKIVPA…
>Alen_Al4_ctg01_-_Alen_Al4_ctg01g168t1	MSAQTNAEDLIAHLKSVLLELNAHPYPEIACPPEVPKRASVALILRVQPNYNHWPAYADKPLHSASQHPPKSRRRSSAASASSHKLSFEDILHAFFEQDWVKHGDPEVLFIKRATRIGDKWNGHVALPGGKRDPEDDDDAVTAMREALEEVGIDLGYHNAIAVGNLPQRIVTTSWGKVPLMVLCPYIYLLTSPSYPAQRLQPTEVASSHWVPIRALLSPVLRTHEYADVSARLAKSELGIKRWFLQAMLSKMMFAAIRLVPSNSTHCATIPDFVPAFSAPPKGTVGKARDLVFGEDRSDGKPPLLLWGLTLGVVSDFLEHIPPHNALELWTYPTFTSWDVRFVMWAMSYRFRRQKSLEMSSVPTHSSTTAGEQDLPGFGSEAVGPIFSKGEEGASRPGE…
>Alen_Al4_ctg01_-_Alen_Al4_ctg01g169t1	MAATTTARPSGALRRNVTADSAPSTIANSPSDSPAGSASNTSLSSLGSEADVVAKPAGKLLDTYGNEFEIPDYTIGQLRSAIPKHCFERSAVRSLGYVARDLAQLATTFYLFHNYVTPETIPSMPVRAVLWTLYTFMQGLSGTGLWVMAHECGHQAFSPSKILNDTVGWVCHSALLVPYFSWKISHGKHHKATGHMERDMVFVPKTREVYASRVGKLVHELHELTEETPIATLIHMVTQQLGGWPMYLISNVTGHNFHERQSEGKGVGKKNGFLKGVNHFNPSSPLYEKKDEKLILLSDVGIAITLAALTWVGKNYGFANLLVWYIIPYLWVNHWLVAITFLQHTDPTLPHYDAKTWTYVRGAAATIDREFGFIGRTLLHGIIETHVLHHYISTIPFYN…
>Alen_Al4_ctg01_-_Alen_Al4_ctg01g170t1	MLRQQLIRSLKRPAHRAAFNGSRAFTASAPRPAEVELTIDGKKVSIEAGSALIQACEKAGSTVPRYCYHEKLMIAGNCRMCLVEVERAPKPVASCAWPVQPGMVVKTDSPLVHKAREGVMEFLLANHPLDCPICDQGGECDLQDQSMRYGADRGRFHEIGGKRAVEDKNIGPLIKTSMNRCIHCTRCIRFSNDVAGAPEMGSTGRGNDLQIGTYLETSLDSELSGNVIDLCPVGALVSKPYAFKARPWELYKTETVDVLDGLGSNIRVDSRGIQVMRILPRLNDDVNEEWINDKTRFACDALSTQRLVNPLIRVDDQFQPASWEQALVEIGNAFKKIAPKENEIKFVAGHLVEAETLVAAKDLANKLGSDNLALDQPGGSQPIAHGIDSRANYSFNSRI…
>Alen_Al4_ctg01_-_Alen_Al4_ctg01g171t1	MPTLALTNFNIVCASLGGFITLFGLVSYLMKERFYLSEALISLIAGLIFSPHATNWIRPHDYALHSVENLDAITLYFTRVVLGVQLVLAGVQLPSKYLKTEWKSLALLLGPVMTTMWVVTSLLVFALVPHISFLQALAVGACVTPTDPVLSNSIVKGKFADKNIPKELQKIIVAESGANDGLGYPFLFLPLYLIQYIGSSGHEDGKASTAVALWFGETLGYTIILSVIYGAAVGWVAKELLHWAEEKKYVDRESFLVFAITLALFIVGTVGMIGSDDVLACFIAGNTFTWDDWFRLETMDDSFQPTIDMLLNVSIFIWFGAICPWAEFYHNNVIPIWRLVILGILVLLLRRPPIVFGMHKHIHQIEEKRQALFVGFFGPIGVSAAFYLYVSIEFLNKLT…
>Alen_Al4_ctg01_-_Alen_Al4_ctg01g172t1	MASNDDQGASYEAEHVHEVYEEIASHFSSTRYKPWPIVERFLKEQPNGAVGADVGCGNGKYLAVNKEVFIVGSDRSTNLVKIATQHEPHDVIVADNLSLPHPANSFDFAISIAVVHHLSTPARRVEAVRCILDLLRPSQQGVAGSGGKALIYVWALEQKSSRRGWDEGGEQDVMVPWVMTAKKEKVPKKKKQQKKKGEDANARDGGEAEKNTEQPPVEKSGETVEAKSEGDKTYLRYYHLYRKGELEEDVEQAGGVVVESGYEKDNWWAIASLK
>Alen_Al4_ctg01_-_Alen_Al4_ctg01g173t1	MPPPATGWRERLSDMYDRVKGVPKAPTVSPTAAALLSTAFVVIYVLPFYLSAATRPSPSLTRDAPSSIRARTRAVTFSTVACTVITTLYLHQHDVSAYQLLHLFGLWPVSVLDIARGILLVCILFAGPLYENGIVDGDWKDWIKLKGVHETLSSWIGYRNFVVGPVSEEIVWRSLMVPLHLLAQFSEKQIVFLTPLYFGIAHVHHLYEFHITHPEVPMFMATLRSLFQFTYTSLFGFFATFLYLRTGNVYTCILAHTFCNWMGLPRIYGRVGVEAGVPIGPPDVDKKDDGSKSVLSYRGKGVSWTVAYYVLLVAGAVGFYSQLFPLTESGHALLVRSTSKT
>Alen_Al4_ctg01_-_Alen_Al4_ctg01g174t1	MSSNSDPRHRATNSQNSITSPLAQAPKFTPPSHPRPAPAFRRPLSEASDQSNRHSGPTIRIVDDPGNDVYDKFPLPSEPSQILPPPRNAPGYAFETPGSRVSSGSRVANALAKFEAIGASNTLAPQPPSQRPKNTFRHSVSTNTSEDDTLVGTFNSRSSLRFSQGSTPPSSPGQHELKDFETELEVLEEETTPPARRSTIRAVPPSSSGGESVASRTRALSPQESVASFASTTPAASPASPSNADRNSTGVSGPLPKEHTPSAGSEDGRQQALDSDFSHRQLVLKPSAESFAYSDISSTSIEPKQPTFSPSPTIHEASTATWASGIKVNYPVVRPPTNNSQRAESQTTPNIASRMLDRGLAHNWSSQLSTIASVSERDSRSLARGSRSFSPRSLSSDSY…
>Alen_Al4_ctg01_-_Alen_Al4_ctg01g175t1	MAVRAQFENSNEVGVFATLTNAYAIVAVGASENFYSVFEAELQDVIPICHATIAGTRIVGRLTAGNKKGLLVPTTTTDQELQHLRNSIPDSVKIQRIEERLSALGNVICCNDHVALVHPDIERETEEIIADVLGVEVFRQTIADNVLTGSYMALSNQGGIVHPKTSIQDQDELSSLLQVPLVAGSVNRGSAVVGAGMVVNDWIAVTGLDTTATELSVVESVFRLGEGGPERINTTHKDAMVESFY
>Alen_Al4_ctg01_-_Alen_Al4_ctg01g176t1	MASSNSTALTKRSAAGALMLPPPAPKRIKRPSVVLDEDTYVSAVSHIIRRDFFPGLAESDAQREYLNALESKDKSWIRESGRKLTQVMTPVPHGRRRAADRTRFDRPGLGSTDKTPSVWGADTPATVAGTEEGSDNEDGLGKLDKVDLDMPLNAFQAKYTSEDQESFSAIIDKQNLKKFEKNTWLHDGNRYASKQRIAQQKVIEARAPDSQALVVRPSQNLDDRPAAPTMHKHTAFNTLMFAPDSVESWAPTNHARAETASLAPPKQTRYANTRLPADTEVPQRPTSPTLSAIRDAVSGNPRLGASEGGYTGSETPRVNGYAFVDARPPEPDSEVEDAPEDLLERFGVSSKSSATSFTISDASKREKMAHKMVDAIGAKRASGSNSKPGPVGKGLGIFT…
>Alen_Al4_ctg01_-_Alen_Al4_ctg01g177t1	MPPKRKSKSMPLAKKFNNKSSARAGTSAVSTKRKQPGEDWKQSRLAPDIPLHMTTRRAAKTSSNHTSPAAPSSAASGSRRSSLNDIAQQSDFDDEPAKRSRMSTDSGSPNGSFGNNTPMNGTQTPNQDESVAEATLQLTKAAGKRRRVSDDSTQSSRTRPNGVLTRTQSDVSEQQPRRKKRKTTDAPADSADQPPELTDASTAPNSPEQVPDVAINLNLRNVLPANGDAPAKIPKRLPGRRRQPHPDTNVEVDLRRQLTLKTSYRSVAKVLKGVLDELAQRTNKNLQDDPDYHKQCPEYEPLMAGLDQKRDTQLDYLAAWRSERIDQLDRVRIAEERIQKQQYFNRFEDLRDDCLQRCYFRMKQIEREWQAAQNDATDDEDNVLPPTYTDGATQGVDER…
>Alen_Al4_ctg01_-_Alen_Al4_ctg01g178t1	MIGVSVLLSATALAISLVLIISIRSKWDELIGTSSSGPISNWEGVFVGHIVVWAISCFSQVVLYSSVFWKRHTPKLQPITVSGPRDSVMSEMRSTAPSRNLFAMEPTHPSSPLAALPSPTFSTRSSQSLRSFRESIRHAIRPVTSRTTLISRPSFNRDTRSIYSDAHSIDNVSHSDGFDSWDTSSVGVQARDAVMQTAPSKGTPLDPIPGSRSVTPARALDGPFLPEIDEELTEEDLVAPRMIPDVSRPPSPAVSEAHIHPLFRTESPVPPPEATPGTSIIASPLADQVITCPSRPYQRMRSNSNLRNNTTSPSPLAPVQSLRGRTTSPYAGSRTPSPPSREMTPPIPDFVLNSSPRSSMSGSRKVSLRNSPDR
>Alen_Al4_ctg01_-_Alen_Al4_ctg01g179t1	MKITFKDLKQNKFVIEAEPSETIGELKAKIQSDKGWEVPQQKLIYSGKILQDANTIESYSIEEKGFIVCMVSKPKQPAASASKAPSTPAKPAAPAQTPAAPAAPAAPAPSSSTTQNVPATPSPAPAQQSERFNDPSALTMGGERDAAIANMESMGFARADIDRAMRAAFFNPDRAVEYLLTGIPESALQEQAQQQSQARAPTSPPPATGGNTGATPAASGGDEPINLFEAAAQAGQGRGGAGGARSGAAAGGGAGAGALNANSLDFLRNNPQFQQLRQVVQQQPQMLEPILQQVGQGNPQLAQMIASNPEQFLQLLAEDADDDAPLPPGAQSISVTEEEREAIERLCRLGFERDLVIQAYFACDKNEELAANFLFDQPEDLDDQ
>Alen_Al4_ctg01_-_Alen_Al4_ctg01g180t1	MAASDEQPAREDASNPELDVKKLHALPTEQQDLYLLTFTSDLARHVDSLDADGASAHQIYIKKELFQVINLASPAPTRVIRNNLGRAFAGILGKGDRKLLFESINECVSILNGAGKSEKDVRAKHAAAHCLGCIFEAAGDSAINLAPVAAMSLLRLIKFAQNYTGLRAAIFKAVGRVFKGITPSADENVARDAWKQARNACAADKSLLVQSSACFCLEQLIKYTALFDNATDFDKLQTAVWKAIDSSSATLRHAAASALSASLVKNYSETAAAEEPIMGITRVGTGATKKKNKRMSTIDGGDDDIMERPESPAPKKSAAKIMFTISTTLKLLSTQYCRPSTSHRARAGIAVCYMKVLRGLGEQIVESKYSEIARSLFTDILSSQVITQNRYRTLSARKY…
>Alen_Al4_ctg01_-_Alen_Al4_ctg01g181t1	MTAPFARAVRASLSFEGAAQCACPVLRSRKARALEQVRCLSATSSLQSGHSKWATIKHDKAKNDAGKSKQRSLMTRDITNAVKIGGPNPDMNARLHLAISTAKKSAVPKASIEAAIARGQGLSATGAALENLTLEAILPPSIATIIECQTDNKLRALAELRLIVKEAGGQVSTVGFMFEKKGRIIFSKKENMGVDELLEPALDAGALDVLEDEEGRVVLYTEPAQTNKIAESLAKELEMEVEESEIIYDPNEDTKVPLEDEGAAKELSERFLDKLQDVQGIQGVYTNWSKGSIPDDLWEELKSKVTV
>Alen_Al4_ctg01_-_Alen_Al4_ctg01g182t1	MGGPNLEVAKFGMYILFPISIMYYFGTNLDGKFSVPDFWPKPEQTHRIPYEREEIAKELERLKARNLENKRRREEEERRMAAMGISKDE
>Alen_Al4_ctg01_-_Alen_Al4_ctg01g183t1	MSEPGILVEYKGKVAIITLNVPKKLNALNGDLYYQLARAMNEVAAHDEVFITVLTGKGRFFSAGADVTFGAAQKSSTDIDERQMWLKNFVSNNLHITHAFYTHPKILVTALNGPAVGLSAALIAFSDFIYAAPHAYILTPFSSLGLVAEGNASFAFVKRLGISKANEALIMSKRISCEELVQTGFVNRVFDVGSKDSPKFLEEVLKEVDDRLGDHLNGESLIKIKALIRKPDMDTLDRQGVEEVFGGLNRFLKGVPQEEFRKIASGEKKHKL
>Alen_Al4_ctg01_-_Alen_Al4_ctg01g184t1	MATPRLPFLWPMLWKPSNAPRIRARARAPPSKCTLATTSYRRIEAPIQRYGKAHEPAPHLREELSKTEPTPPKIPHDPAKDVEEEDDEHEAHLPTSPPSTPSQTSSIEDTPPTYTPPAPPKTGEAKPLDSVLHMPGPSEEDHKPPHLKTPPYVHHFDTYGLVRQLSKSTYTDAQSVTLMKAVRGILIENMLLARQGLVSKSNVENETYLFRAACAELKTEMGNARRGEVERMRTERAQLQHEVDILGQKLGQETGSVKDELKGLFDDRKMAVRQEQRSMETKIQELNYQITIKLNSDARSEVEGLRWVLTRRIAMGIAAMATMVVILLQFNSSRKHEAKEEAAKKKKVDDAGGGNNNSGGAEEQRGGSSAGSGVAGSAQGDKLGGELLATEGVSLG
>Alen_Al4_ctg01_-_Alen_Al4_ctg01g185t1	MPPPADDDRRASSYDILNAFRRLTGSRPRGEPLPPPPPVNPVRALSVGSLPPSSIASGPSADDSLQRITHVASNTVRPDVTGGPPELPHLVEQLDKSHPFLERADAVEKICRVLEEYPLQNILGLWSVASDLVLLEQPDDVAEAGYKLLKSISLDPKLTPVERTIIFDAAAYRRTTRCFQWRLDIVSTLTNGGKNIAACESAIVPFILNALDACFRASRDAFNSNRKASGKRSLDNPLPETENLGRIFQYATDVCKFNARILTDNNLEQILERAMHICQNTTQQVDMENCIKLFDTIITYVHVPTNALKPSLEVLCAIHRQILGLQDQTWNTLSNLFKSHIGQAAIMSLLHTLRDGPSIKNRQSSLYRGTMQVLQLLVLKDGQGELPKVPMSLIFSALK…
>Alen_Al4_ctg01_-_Alen_Al4_ctg01g186t1	MAADMSTLSKLLEASLDPRQNKQAEQAIAHEQTKPNFSLSLLHIVATDSAPPTIRLASALYFKNFIKRNWVDEDGNYKLPLDEVTAIKRELIGLMVSVPPSLQAQLGEAISAIADSDFWERWDTLVDDLISRLTPDNSTVNNGVLRVAHSIFKRWRPLFRSDDLFTEINHVLSKFSTPFLTLLQNTDNLIAQSHANPAALKSAFTTLDLIMKLFYDLSCQDLPPVFEDNIAAISSVLHKYLTYDNPSLHSAEDDESGPQEYVRAGIFEALMLYIQKYEDAFGAQLGQFIETTWSFLMTVGLETKYDILVSKALQFLTAVASTQHAENFNNQTVLVQVIEKVILPNLTLRDSDIELFEDEPIEFIRRDLEGSDNDTRRRAATNFLRQLMSKFEGLVTSTS…
>Alen_Al4_ctg01_-_Alen_Al4_ctg01g187t1	MATSTLPTTKTEALYQKDGHLFTHSAPISSVQPLPADAQGLFKLPAEGEPYVLTTPRTIFHAQGGGQPSDTGIIAWKAKKEKEKKKEKKRKTKKKKKKVTKTSTSTPASTPPAFPAPPPPNEKNPTSSPQPSHGTASHYPNASFVEFSGLIPNRKPPLAIPNRRPRTRTCVSVFTSGMKRGRGGSVRGVG
>Alen_Al4_ctg01_-_Alen_Al4_ctg01g188t1	MAQPWDYIAKIVSLGDSGCGKSSLTVRLCEGRFSPHHDVTIGVEFGSRIVPVGPPASHSLSINNPSNVEPPPSPSKKDPAQKHMKLSLWDTAGQETYKSITRSYFRGASGALLVFDISRKNTFLSATSWLHDLRQIAEEGIVVVLVGNKSDLAASSTVTESEADNKRQVTREEAEEWCKANGVMQYVETSAKSGEGVERAFLEVAERIYQNIEAGRYDLNDRRSGVKGPGAGGGNRAGISLGMNDAAKKGKQQGWGGCC
>Alen_Al4_ctg01_-_Alen_Al4_ctg01g189t1	MFSEYASKFLSQSQSRLSLGQPESTFARNPSDRQRPSSRAAHAYLHRRNMPNPYSSQAMSRFAFASRTSNAPAPLFYSATDDFREEDDHVEHDREMADHYALQRSRRQFGASNLSDSSEVDDDGVHRSDHTIEADGDENDAPDYGLGRGIKSSWRGDKPARGRSNTATRLDDEERGSSVPLSESTEPSSRGNGRLVDVELASTERGSIEELDRREAFDHKDEPPPSYQQFRNMPRNKRPRSPLRTTLPIPQETDEDVLLERPRSMSPDRHTVPDLVPENPTAPPRHNFFWAELFVIVQCAMIGIWFISFLQESPPGKKNPLGDTVYTVLQSSFHLIGVYSLVSVIVGLLWLSLLRSFARPLVYLMLVAVPVISFSFWLYPFISSLKGSWHGNSAQDKAM…
>Alen_Al4_ctg01_-_Alen_Al4_ctg01g190t1	MAAEPLSPMDFIAPARIKAQLLPVGRIKRSRFLAFVDLLRQQSLVRLGDVSPDPRPDRNMFSPLAFPNGTLLFDLSTSLPSASQLSLSPFEQFREPLLVIGIADATEYSWLDGSRADGDGSPFQPAADDEDSQELSSAAEDLQDQFPKAYHHSIMLFESTSQSRHPRLPQETLLVPPMARLKTTTLKTIMCDLTSTLLAELTTLARSMQALPTIASPASHSGSADNAPSWASPDSGTSQFSRRNSQAPTGSRPESPISGAQSKDLHRMSMPVLSSSSGGPLSTDDLRAGSPSTQGTHTPPTTFDEIPGVNAPNSPPSNTTSAKSARDASSDRVSIQGFGSGGVGERARNKGRGRVSIVIGSLYMCAGHWHEAMRELTDGATRARAYSDHLWQAKALENI…
>Alen_Al4_ctg01_-_Alen_Al4_ctg01g191t1	MASIDFARLRNQTMADGLDSEVTVNTRALIDKVLARYSSEHTTLRELIQNAADAKANTVTIRLETDPSLSIPTPQGAEDPVLLRHVIQNHTLKRLVVTNNGQAFTTADWSRLKSIADGNPDETKIGAFGVGFYSVFADCDEPFVVSGDKTMAFYWKGNTLSTKIASVPAGHDTTLTIFSLDYRQANPASPSYSPSKLPNLPDLCQFLATSLTFVGLESIELHVDDYVVASFSKKISPPEDIRVPQGLKTETEGGLMRVTHVTRQHSQIDAEWLNVMASAQLPPKRAADLVQQEVRNAGTTLRSFFSKFSAPAPQPVVKAAKPLPTEKLSSDQAVAGESKGTIFLQVYTVEASTKVSQKFAAEIERATKKSPPKATKIALLTSPYQDPSAMLSTGSGSTA…
>Alen_Al4_ctg01_-_Alen_Al4_ctg01g192t1	MKINNLTISAIGFASLAAAQNGNDPLILNNRTGLAPIVYDTFSTSYTKLPVNGSALSQAVPATVPVLTSSLVRSNTHLPKPTTSVECWRNGYPCANGGQRSQRQVANFVRATPAPVDDESIVETDVNAVPVPSQGIPRLVGMAVAPRVPPPEFFSSRPDVHVPGETDEPTVNILPIPTEFLDGPHYDVPGETGEVTFTILPISTTPPEDNRVVVPTEWWRGPVPAYTIDCNRHYCPTNAPSPSPAPTSLPTTSYPLLPPTESFTTKRPAVPPEVTAPALPARNAAVPIDWWRGPNQPVGPVESIESIESIESTHTSDCKLHYCPSWKASLVDPVRSSSTKKTTTTTLSTVVLPTGTERTSFPAVPPVVPTGV
>Alen_Al4_ctg01_-_Alen_Al4_ctg01g193t1	MTSEPFTLRWGILATGGIAKTFTKDLLVDPSTRDANDIRHVIAAAASSSSTSRAADFLREVGAPDSAKAYGSYRDLVNDANVDIIYIATPHSHHYQHTRLALEAAKHVLVEKPITVNAEQARILFALAEEKKLFLMEAVWTRFFPLTREIQGIISSGRLGEIKRVYADLSFWNDVEQEFGKEHRMVNLDLAGGALLDLGIYSLTWVFIVLYHLQATQKRKTPIVKSAMSLYRETGCDEMTSIILNFPDARIGTTTEGDAGNGDAHAIALTGIRVGHNPNPSHPSPPPVRIQGTHADVEIAAPSYRPLSYTLTPAQTATRGKLADFSYGCKTFEIPGQGHGMFWEADECARCVRDGRLESEVLGWEESGAVMQVMDEVRRQGGLRYPDVVESVGYPLEGF…
>Alen_Al4_ctg01_-_Alen_Al4_ctg01g194t1	MSEIKQEAQGKLAESTQSLPQSTAAQQSDNVAHALAGAGGGLLSMALTYPLITLSTRAQVESKRAQSSTLGAARRIIKREGIMGLYAGMESALFGITVTNFVYYYWYEWTRAFFEKAALKAGRPSKKLTTIESMIAGAIAGSATVLLTNPIWVVNTRMTTRKSESDEQLLPGSTPAKAPSTLGTLLALIRDEGPLRLFAGVAPALVLVINPILQYTVFEQMKNALEKKRRVTPKDAFYLGALGKLLATSITYPYITVKSRMHVAGKDGPRESMLTTFKRIINEEGYSGLYGGIGPKVTQSVITAAFLFAFKDVLYAYTVQARKKLASK
>Alen_Al4_ctg01_-_Alen_Al4_ctg01g195t1	MVVPMIAASEEELGKIQVGKSGSPDTSPHRGQASRVRGLDGILNLLAKRGDVELQGAIPVPYDERTETNYFNIFTLWFCMSCNPLPVTFGMVGTASFGLNLRDAALVILFFTLISTVPVAYMCTWGPRTGMRQLVQARFAFGKYFVSLLVLLNLATLTGFCVVDATIGGQALSAVMEGRTINATVGIVIISLLAMLVAFCGFRILHHYERWAWIPAVIALAIATGCGSEGLKQQVSAPAATAQQVLSFGGLVASFMLPWAALASDFSTYMHPKAPPSRIALYTYAGLALPTILLMTLGAAMGGAVSNVASWEAGYDLNAASGVLAAMLHPAGGFGRFVTVVLAFSMLGNLSATMYAITLNFQMALPWFFRIPRVLYAVLITGIVIGVAIPAAKSFFLNL…
>Alen_Al4_ctg01_-_Alen_Al4_ctg01g196t1	MAAAEPKEIEKEVGEEPELAVGTDEAYSIYTNKEKWLIVAMVALAGFYSPLPANIYFPAIPTIAKAFQKSVDDINQTVTVYLVFQGISPMLWGPISDRYGRRLVFLGCLSILVAASIGLALCPTDQFWLLLFLRCFQSGGSASTIALGAGVIGDISTSRERGGYFGMFNLGPMLAPCIAPAMGGALSQGLGWRSIFWSIVIMVAACLVLIALFLPETLRSIAGNGSIPVPRHSRAIITIVGRKATLRAADTESRAKPKHSVNPFVLFTYPDVIVLLTFTGIVYAVNYTITATISSSFAKIYPHLSETVLGLCYLPTGAGMIIGSTVTGKALDWEYDRIKKRSGEAFTIEYARLRLMPYYLTLFVMCVIGWGWTIQAKAHMAAPLCLAVLLGWTSMGILN…
>Alen_Al4_ctg01_-_Alen_Al4_ctg01g197t1	MSAQSNDQQMEGVQDTKGKGKAPQQNTMEESEDSSDESAAEDQTAEPEEADEDNMEEIETSNIIQGSRTRGKTIDFAKANQELEGEDDEDEDDDFVDPDDEMKD
>Alen_Al4_ctg01_-_Alen_Al4_ctg01g198t1	MGRVSFAEDTKLPDETYIEEEPTKVFEYQDGPENKSWAGALPLKQGLYDPSLEKDACGVGFAAHIKGKASHKIVTDARSLLCNMTHRGAVGSDARDGDGAGVMTSIPHRFFLKEFEREQGYKLPALGQYATGNLFFKPDPTILDETKTMFEDVADQLDLRVLGWRVVPRDSTLLGPAALSREPIILQPFVVLKTAYGDARQPKEDFEKTYDAGYFERQLYVLRKRSTHVIGLHNWFYICSLSNKNIVYKGQLSPVQVYEYYHDLLNVDYEGHFALVHSRFSTNTFPSWDRAQPLRWAAHNGEINTLRGNKNWMRAREGGMKSSLFGEELDLLYPIIEDGGSDSAAFDNVLELLTINGVLSLPEAVMLMVPEAWQGNHTMDPAKQAFYEWAACMMEPWDG…
>Alen_Al4_ctg01_-_Alen_Al4_ctg01g199t1	MLPRPGWQHAGPRPLQGLTRTSGLTPFPVTPSLYRLRQLPWKSSTRYASLQAGEDKTGHISAGPNEGILFFNNVFPISIRRFLGLPAPRLLDRLVAPAMSGTGPQQVIERAKAKKGLQITATEVLPRMREGGAFVKFTHDGTASTSEIEKVLQQYLRDEPVKPWWAPFRRMRTKIVKGRPWVEDMMRMPAPRLRVEFISGEPGGNPADAVELSQEELFQFFRPYGKLSDIVMQPPDSKILPKFAHIDFSTMGKAIMAKNCMHGYLVSQAEGGGAKGTILRLKYEQKIKPRWVRDWLFSHPRIVIPILAAIIAGITVAIFDPIRTFFVKAHITRVLHLEDNRLYKWLKGYAEDLIRGKKDDDEAGMDAIWDDRKGNIEQVQTWLMETADTFIIVQGPRGS…
>Alen_Al4_ctg01_-_Alen_Al4_ctg01g200t1	MAPLTDSAVSDLQSTVSRLEKRIAELETRLQGQVGIADQSQESVRMILMGPPGAGKGTQAPRIKDKFCACHLATGDMLRAQVAAKTALGREAKKIMDAGGLVSDEIMINMIKTELETNQECKNGFILDGFPRTVTQAEKLDGMLTATQKPLQHAVELQIDDSLLVSRITGRLVHPASGRSYHKIFNPPKSEMTDDITGEPLIQRSDDNAETLKKRLATYHAQTAPVVNYYQKTGIWKPIDASQEPGQVWKSLLKVFDGKARVAGQTGSLLNKIGLKN
>Alen_Al4_ctg01_-_Alen_Al4_ctg01g201t1	MSSRFGRDAARDDLFSSYNRSASPSKSKNKSRASPYNSTGGYGLPSSSDGPGFSAYPSANANTSLYGGSGYGAGGGYGVGGSGRDGGARDGGLGGYRSTTPNSKGQYASATLDELESQNEEHTGVLIGKVKMLKDLTHLIGDEIRDSTTLAEKMNDQFENSRNKIKGTMNRMLSMAKKTGVGWKAWVAFFAALILLFWWVWLG
>Alen_Al4_ctg01_-_Alen_Al4_ctg01g202t1	MAFGWLMPTYRKPLWIETVVHDGLCQSQAHVDWLIGNSDMLTQWQHHLHRQPASIFFIVISMSVLWIFVSYLSSWKHQRVVQTPAPQGPSALTSPPPSSSPPQASNKNVTPPNESPVRPVMIATAPRLAGTSSNVPSLQSDHHLAKRTGLVSTPGYQTPLVTNPGKLNFSGLSKAAPVSYDTLQRNGILNQDGTPTKKYSHGLGKGQKISLDDEEAVYPYDSPTRTWGRPKQSPQIMKEVQRQAEGVKALWVDDPDDGRVQHFSPVKGESKTS
>Alen_Al4_ctg01_-_Alen_Al4_ctg01g203t1	MMDATNSPTTPSAEVAAVEKTASGHSSSAMDTQITTGLSTATAVEGETATPPPRLLDSDPSKFRSLKQVIVIGRPGSGTDGISAALKKLGFKVYDFQAASSRYERDFPLWAEAALLRKEGRPYNQSDYDKLIGDYNALVGAPTSFFESEFVKLYPNVKVIMMTHQPDPAIVAGIFGKVTSRFWRRVDPAYHGNMFRFLTLSDDAELNHCVGVDQRFVREVVREKDLLEIHSLVAWIPLCKFLGVSVPDGPAPELHDNETKTELAARPQRALSETGNRVCRSIVKVLSYISTMALVTTIAVLTVVIGAFVLLKLSFIVMRLFNFLVIRSQVRDVMRFLAVGVALLTLACGFVAGYTLGSSRHSKVVEISSPTPENQRKFRNGRRKSKQDRSRQSDNDENT…
>Alen_Al4_ctg01_-_Alen_Al4_ctg01g204t1	MAMSLRAARLLGRRVAVLPSSLRLSRVARQSSRLNFAPRAFSTTAARHDTPDVFHSLREGPAANFLGTIQETPKTPQTLTEKIVQRHAVGVAQGKVIRSGDYVTLQPAKCMTHDNSWPVALKFMSIGATKINDPKQIVMTLDHDVQNKTEKNLKKYSQIEEFAGNNDVVFYGAGRGIGHQIMVEEGYAWPGTLAVASDSHSNMYGGIGCLGTPVVRTDAASIWATGKTWWQVPPVAKVTLSGTMPKGVTGKDVIVALAGLFNKDEVLNHAIEFTGTDDTLRTIPVDDRLTIANMTTEWGALTGLFPIDSVLHGWLRARATLAAMGEGEAKDHHQEQFVHERIDELFTATGIVGQQLGHIWKPALAADKGAVYAKELFLDLSTLSPYVAGPNSVKVATPL…
>Alen_Al4_ctg01_-_Alen_Al4_ctg01g205t1	MVQRSDVNYFGAGPAPLPTAVLEKASQALLNYQDKGLGLCEISHRSPEANAILAETKQALSDLLEIPDDYDILFLQSGGSGEFSATVYNLVSIWVEKKRAQIAEEVGDNKDEVLNRLRKVVDEELKLDYLVTGSWSLKASQEAARLVGAKHVNVAVDARKANDGKFGKIPSEDQWNLTPRSSGGPAFVYFCDNETVDGVEFPSFPKSLEGEDAPIVVADMSSNFISRKVDVNKYGVIFGGAQKNIGNTGIAIAILRKSLLPPQSPYASPDLLRELNLAVGPIVLDYPTIAKNNSLYNTLPIFDVWVAGQVMKGLVDSYGTKRISGQEEISDEKANLIYGVLDKYSDIYRVVPDKSARSRMNICFRVSGGDADKEKAFLAGAEKKGLLGLKGHRSVGGIR…
>Alen_Al4_ctg01_-_Alen_Al4_ctg01g206t1	MEGWIARLPLLEARSHFNVSLNTSAVSETSWTSTNSTRAVIASLQLAQVQTLRTMHLALGVFSLACALSTVYRIVSDARRAAALQVTLRKQRFNCLQNVHPAETFPLALASGVVLSQIIFVSVQGTTLHSVLSNSCRMLAMITYPAIFAMGYITLVFGIETAFRSFKKERFAPRGKWNTILCICVVAFFLLLTWIPTIAWPMLNRCFGSLIFFPMRYDLLTLVLLVILVSLLLLLAAIISVQLMRNAEVDPNERIAASRMFYYLLLTSVIYILVIPVEVQSLQENFDSALGGSRFAEASLFSSGMVVSFFHLFLRTNANRLVIRPIEETRAQPKERRPRIRFFGPSDLEMNISGPLSLQGGHRPDSRQGLIDVGPEKNRIDFEPEYFERPERAMTPGSK…
>Alen_Al4_ctg01_-_Alen_Al4_ctg01g207t1	MAGRYATLPPPTRDSLELASLASSSHPSRRTSQDSSASGAPSSRRLSLDDEDPLFESTEHHGTADRPRHTRSYSVSSAFDFAPSLFPLSSTAQGYTALGAPSNPALDPTSALNGGALEKNKSLTYLNGLSLVIGLIIGSGIFSSPSQVNKNAGSPGASLLIWVVAGVLAWTGAASYAELGGAIPLNGGAQVYLSKIFGEWAGFLFTWCAVTVLKPGSAAIIAIIFGEYLVRAVIGADAVDASAWLNKGIALAGLVVVTALNCVSTKLGTRSADVFMFLKFVALIGVFVIGIVVAITGLSYKGDANQDWKNQGWFDNTSHNISNWAVALYAGLWAFDGWDNVNYVTAEFKNPARDLPRVIHTSLPLVILCYILANISYFLVLPTSVIESSNTVAVAFGAQ…
>Alen_Al4_ctg01_-_Alen_Al4_ctg01g208t1	MQRLSPCRLAWRPLPRHVVLLCARRASSWPVPLTARRRAAADVRMETLTPKWQPHWDALAATQQEPAPTKGKAYVLPMFPYPSGTLHLGHLRVYTISDVLARFKRMQGYRVLHPIGWDAFGLPAENAAIERGVHPEKWTLQNIDAMKAQMKLMGGRWDWDSELRTCDPAFYKHTQRLFLMLHHRGLAYQAKSLVNYDPVDKTVLANEQVDANGCSWRSGAKVEKRMLKQWFLKIKQFQDPLLHDLDTLAEKGTWPDKVLAMQKNWIGKSEGTQLWFDIKPKHGDTHFDPVDVFTTRADTLFGVQYIALSLSHPIVQRLAADDESLRAFISRAKDLPLDTKEGYRLPNVVARNPLAQVTGASDASIPVYVAPYVLDDYGSGAVMGVPGHDTRDHSFWRTN…
>Alen_Al4_ctg01_-_Alen_Al4_ctg01g209t1	MSLALPRLSRARIPHLRLLRPFSSTPTRYSPSPVPSIPYTESCPAPTCACAPTPADLDIDRTTPLLNTMAPYAEQVLLCTGKEDWASNLEDEGGATAEFVKGMKGVIGRGGEAFDPFTNILLTASSLPASEQKDSTTAYLFPSFLRIPNIPHSHAAYRALASAYLSAETLHPTHAALSASQKEKITRDTAQARLLPRAERVTQPVILICGHGGRDRRCGVLGPLLQDQFRAELARRGVRAQVALVSHIGGHKYAGNVVVYLPPGWRADESKTSELKMSQSNTTIHQHPSHVSAPSKAAESGTGG
>Alen_Al4_ctg01_-_Alen_Al4_ctg01g210t1	MPRIPTALLRKARAIDPFLPDLLAPCRDLHTAQKELRWLREHVEKVAKARRARGDTLAKGALLRQLVSQRARGKPLQYLLGTEFFGDLELTCRPGVLIPRQDTAASVTHLAKLVRAAQNLPSELRVLDLCTGTGCIPLLFRHEFTSARRDIPLRMIGIDISDESMDLANHNLRKVEKSTQSRGGMTDFAKADVLANPFADLAAGAPLPLKTVLNYKRWAPFWDILISNPPYISPSAYWKTTQRSVRMFEPKLALVPPKSNLDDTQQGDIFYPRLLKIANEVEAKVVLLEVADLEQALRVAHLAQKTETFDGVEIWRDEPDASTQPTTEGEFRIYGEGNARSVVCWRGAGASWLGKAGRPKALDANQHASEDSLIKDLSPSFHYSVINGNNVKALPKFKR…
>Alen_Al4_ctg01_-_Alen_Al4_ctg01g211t1	MFNRLREKSHGSDEKRQSFDGHQQQQPTSAPAYASTSSDQPPPPFQTRFASMSMHSNDDLRFMHFPTEVVDQCRSTVLGVWKGGIQKERMYGNSQEFKLSGYPWSAMGSDAMEACRLIGALLGTLRSLGWVLSLNTNVSQNLANKDSLIFRYQSPAPAPCDWCSISFSRTDRIRLIDVSPEVCQALPARLGQEWVSKTSQYAPGIQEVKLHGYPWAAGGKDTMRVRELLLTMLETLEEEGWTVYASIDQSMSSQNTSETDTVSILKSFIE
>Alen_Al4_ctg01_-_Alen_Al4_ctg01g212t1	MSWVKQRAGPLIILGTSAAGGAAYRFFGFSKASDESLNPHTFTPYTLVDKQPVSSTSAIFTLRNANGVPDSQSVKEVEKRSVWSVQIKQPQLQIARAYTPLPHTADGKKDENAPQDMRLLIRQETRGEVSTYLHRLPEQATIELRGPNAEFELPRNVKEVIFLAGGTGIAPAMQVAQALSRRTGSQMQILWANRKREECVGGISDDKGTSKPSQNRLGWWKSVLIGSSETATLVGLSQDDTTESETPQRKGLIVKELDALKERNTVATQGLRVQYYVDEENTFIQPDDVIKRMASTSQEKGSKLIIVSGPDGFIEHWAGRKLWMDGREVQGPLGGVLKGIDLGDWKVFKL
>Alen_Al4_ctg01_-_Alen_Al4_ctg01g213t1	MATDLELGSRPSTPTSERNEKDPNARPACFKSTLQECLFVLSVTMAVAMTSILTGAITVMSSFAARDLGMTNAEITWMNAAASLSAGALLLFFGSIADLFGRKSMFIGSMFFFSILCLGTGFAKDGITLDVLCGILGIFSASAVPPAQGILGTIYDKPSPRKNKAFGCFSAGNPLGFVFGTILSGLFTQLFNWRASFFLIAITYFLTSIVAALTVPVDTMPKQKFDQETLKKLDLPGTGMTIAGIGMFCAALSLAGDAPNGWKTPYVLVLLILGLLLIVAFVVWELKYPYAIVDMNVFKDRDFSLLLLILSFGYLGFPVLSFWLALYFQTELGYSALMTGVHLLPMVGVGLLANAVAALIQHKVSNKLLMGIGAWAYVVSFILAAVQRYGDSYWAFSFP…
>Alen_Al4_ctg01_-_Alen_Al4_ctg01g214t1	MGKKFYGLTGTKLNIAIAVVAGTDFALFGYDQGVMGGLLTLGSFLRYFPEIDTVNPPGGNASHTATIQAITVGAYTLGCFFGAVATIWLGNMLGRKKTIFIGSCIMIVGAALQTSSFGLAQLIVGRWITGFGNGMNTSTVPTWQSETSKPHRRGQMVMIEGSLIVFGVMLSYWLDLGFSFLEPSSIAWRFPIAFQIILAIVILILIPWLPESPRWLVLKGRDDEAWEVLAALSDLPKEDKKIVAELQAVKDVVFEMSRGGFRECFKTNRNRNFHRTALAYVNQMFQQISGINLVTYYAATIFENSIGLSPFMSRLLSALNGTEYWVASWIAIFTIERFGRRALMLFGAVGMSITMAILAGATSNIDNKACGLVATVMLFVFNSFFAIGWLGMTWLYPAE…
>Alen_Al4_ctg01_-_Alen_Al4_ctg01g215t1	MATHDSAKGPSVEDVSLPVSNSPSVDEAPRKWYRSTLFNAFVIGGVGFLAPGLWNAMNDLGAGGALDPYLVNAANALVFGIMGFFCLFGGPLANRIGFANTLFLGAVGYPIYSAGLYTNNRYGNVWLVLVGAVCCGVSAGLFWVSEGAVALGYPEPGKRGKYMNIWLWFRTGGPLVGGAIVLALNNNAAAKKKGKVGYQVYLVFIALQCIACPLALALSPPEKVQRSDGSKVLISKEKTFRAEFKALWRISKRKDVLLLLPIFYAAYFNQYSSNFKSYYFGVRARALMGFVSNFGTLLSSQLISAFLDYKRLTVKKRITYGFYYVVVLHVIAWVYGWVIQEKYTKSNPVFDWEDGGFVEAFFVIILWDFARQALQNWLYYLLATKTDNISELSRFAGVL…
>Alen_Al4_ctg01_-_Alen_Al4_ctg01g216t1	MSGIVKVAVTQHEPVWFDLQATVDKTCRLIEEASSNGAQLVAFPEVWITGYPAWIWARPLDPPLATKYIKNSLSYDSQEMDQICAAARQSRIAVVLGFSENDHNSLYISQCTISSSGEIVMKRRKFKPTHMERTVYGDAGGSSLNNVNEIEGVGRVGALSCWEHIQPLLKYHTISLKEEIHVSAWPPLHPHAEESEGLFSMSADGCAALSQTYAMESSTFVLHCTSVMSSAGVTAHSTEGNPVFGAIGGGHSAVYGPDGRRMTKAIPSDQEGFVYADLPMDMLISLRHFADPCGHYSRPELLWLGADTREKRHVRGEGDSGVSDVKKVNGSGTGGGEDGKANGVAAIQETY
>Alen_Al4_ctg01_-_Alen_Al4_ctg01g217t1	MADLQELLQRLNGGGASGGNHQQLPSSQQQHPHYQQPSVSSPIFSPAPRGPIPHHPSAIMSPNVLSSANTPAPDQGAGSVSQQTPQQQSANLLNLLRFNAQPGLGQRSVSQQPQPQQQQAPVAPAHGRTVSASDFVAGFMGNRSGSQGSVPAANVQSPPAASASEKPQDLLLRLLNHPKPSQSPARSSHASVAAFSPPVLSHMPETAVDDLAQDLADAVLESAAGNPAASAAASPLEVFGNDGMGNAPRHQSEAASQPPKFTYVNPFDQLAAASPRNRTPVSEAPRSAAPKVEILKPKHALNAATAAAEEAPAHSHETVAEAVSDLGEQVNQQVEEALAEAEGKSTSQIAEELNNVTADDINEIEETMVDIATEITRELEEESNKKELERSMPKPLAAA…
>Alen_Al4_ctg01_-_Alen_Al4_ctg01g218t1	MSAAVQRVSNLISLSTSHLALNPAVTASLLYILTSGPASLRTRLTSRIAPLRDPRRHATIIRALKWLLALGVVRSLNRSLNRLALNNYRLRPESARWNWEQEVAVVTGGSSGIGALIVQKLVNHGVKVAVLDIQELPTSLQGYANIHFHACDITSTAAVTSAATAIKQSLGRSPSILINNAGILDAHSILATTDAYLRKLFDVNVLSNWSTVRAFLPDMIALNKGHVVTVASAASYVGVAGMADYTASKAAVLAFHEGLNQELRLAYKAPGVLTTSVHPGWVRTPLLAPVEAELKKRGAVMSEPGDVADAVVKQVLSASGAQVFVPSSGGRISLLRALPNWVQESVRGRVSQTITESVNVGGM
>Alen_Al4_ctg01_-_Alen_Al4_ctg01g219t1	MLLNAKSRAAMAHEGEGKANVDALSGCSSKARQDARARPASCLLEMRGFTAGVHRGGQLQALLITCAGGTEEEEEEEGAPLRAPAELCHAARRDSPQTRRVLGSFAPTLPRPPAAISKLAPSPQSRAHAHSRRQPMTDLLQVLPDLDTRPFSHLLPSLDRALVTTNDLLTLDPHHVAKRAQLPAGELRKLIDALVPALHHHLGFTAADAPVTALSAPWDNPSQSWRCISTLDDQLDAALGGGIPPGYLVEVTGERYFALCTAPLPAPPALPAATRLTCISGAGKTQLLLTLLLAVQLPPPLGLSKTAVYISTEAALSTTRLAQLLSSHPALDRVSPDERPSLANVLAIQTPDLESQDHILRYQLPVAIKKHNVGLVILDSVAANYRAEFEKGASNGAAS…
>Alen_Al4_ctg01_-_Alen_Al4_ctg01g220t1	MAVRTFTQPSSLNESLATATMSTSQENGTARSMEAAKESQQAFSAEAKAPLANSTNPNSKPGITFASQETLPKLPIPELDASCKKYLAALKPLQSAKEHNESQHAVEGFLKADGAVLQEKLKKYASGKANYIEQFWYDSYLNFDNPVVLNLNPFFLLEDDPTPARNNQVTRAASLVVSALSFVRAVRLEELPPDTIRGQPLCMYQYSRLFGTARIPTENGCQIGQDPTSKHVVVMCHGQFYWFDVLDDNNDLIMTEKDIALNLQVIVEDAQEVPIQEAAKGALGVLSTENRKVWSGLRDVLHREEGSNNSDSLNIVDSALFILCLDYTEPQNGADLCMNMLCGTSKVERGVQVGTCTNRWYDKMQIIVCKNGSAGINFEHTGVDGHTVLRFASDVYTDT…
>Alen_Al4_ctg01_-_Alen_Al4_ctg01g221t1	MPSFFTSSPPKKNTPVFAGLDDPFNFPSSKMRYNVRSPSRTSSPDSTTDSGYGSSASLEDLDYPLSPKSQIPVKHKRRLQKKDGQWGMQSYEYQSIANDYFAERKPILDHDSTSAAPRRSADNNHEWKPNLKHTFTLICQDAPAKPKWYTSRIYGRALERKEKSEGLTDLQRSMAPVLRRPSPGPRKKSTLLHPSPPPPTITEPATTSTTTAVIKTTTAMNITGLSQLPIDAYIYISIYISIYIYISIYIYIYRYTTTNPPLPPPPLPNPARHPYHQLPPTDPNTAAHPHAASQAVGAAFVFFRFRRRG
>Alen_Al4_ctg01_-_Alen_Al4_ctg01g222t1	MADTLEDVQMETQDIEQETPPSNVFIAPSIHKTDVLAGKSYSHFSPIPQQIADDMSTECVLGVDEAGRGPVLGPMVYALFYLPLPLHHSLLAETHHFDDSKVLTPQVRSNLMRTLCTPGTDLHNAGGWATCSLSAQDISAHMLSPNQYNLNAQAMDATIDLIKGVLARGVNVKEIYIDTIGKPEVYQKKLERIWPTISITVATKADSLYPAVSAASVCAKVTRDAALDVCYESHHTPAEATAHAQDGGVKVAWGSGYPSDSKTSTWLKANMDPVFGWGNECRFSWATTKELLEGKKAGLSVDWPVEEDGDDMHMTDFLTGGERKGDELVEWFGKRVTVEMEAF
>Alen_Al4_ctg01_-_Alen_Al4_ctg01g223t1	MATARTTGADAQTEELRRRNVAGQTAPPVVNDAQIREKSKEKPFELIAFLDEYEFIWAPLIFTALAFFTRMYKIGLSPIVTWDEAHFGKFGSHYLKREFYFDVHPPLGKMLVGLSGYLAGYNGSFEFKSGEKYPEELNYTFMRLFNAAFGAVCVPLAYFTAKELNFRRPTVWFVTLAVLCENSYTTISRFILLDSMLLCFTFTTVFCWSKFHRQQHDPFSPEWGLWLMLTGVSIGCVCSVKWVGFFVTALVGIYTIEDLWNKFGDLKMPKMELVTHVAFRVFGLILIPFAVYTFSFYLHFLILENSGPGDAQMSSLFQANLRGTEVGKNSPLEVAYGSRTTLKNMGYGGGLLHSHVQTYPEGSTQQQITCYHHKDANNDWFFYPNRHEVPYEAGEELRF…
>Alen_Al4_ctg01_-_Alen_Al4_ctg01g224t1	MSPARHSRPPFDPSPDPLHWSWLLPQPATFTIPFNSGSSRRPANIPLHNLSSFSRPRDGDSAYLLDNDKDSARSSFDTPSSHSDDLSLWSDTGDLVDQLADQEDPLAIRLEGHPPPHRRHQKRARFAPQDSLHEKGHRTLRLDDIEIPDPGIRTISKAEKILARIMAPNDGPSRIHGLHGKKLIYFTSVFVSLGVFLFGYDQGVMSGIITGIYFKDYFNQPTAVELGSMVAILEVGAFISSLVVGRIGDVLGRRKTILYGSAIFVVGGALQTFANGMPMMLLGRIIAGLGVGTLSTIVPVYQSEISPPHNRGKMGCIEFTGNITGYACSVWVDYFCSYIKSDYAWRIPLFMQCVMGTLLALGSLLICESPRWLLDNDHDEEGIVVIANLYGKGDIHNPK…
>Alen_Al4_ctg01_-_Alen_Al4_ctg01g225t1	MSRYGKFDDFCRDTGNSWSTLPVCYLFSQAPTRNGGGWNGGCTLQGFPVGGDSRLHNLGSIILCGIAIAITSFLLWRSERKKAAVGRREMQLFLLGYIIVSICEIFTIGGFPLNDSVRLAFVAVHIAAIVATSWILMLNGLVGYQLLDDGTPISLGLLLISAVIVFVGTGYIALDTGFSWTGYWDDTLTGENQAYALYTLYQLVPLVFLVIFFCLEAFLVLRVLGERKPMLYLLGAALLFAIGQIFQYVISVHICTGTSGKINGGLFETLFTLLFVVMIWVFWSSITEDDWPMPTVAGSGSYN
>Alen_Al4_ctg01_-_Alen_Al4_ctg01g226t1	MADSDYSYDGDEVSGDEYVGSRASSSRPAQLVGDRRQIAKEAAPKPARKAWETEYSRTVEKTIRPVDDDDMGQSVQEREEERKRKRLRKDTKPFQRGIIRHVVLVLDLSEAMMEKDMRPNRFYTMINYAQDYVREFFEQNPISQMSVLGMHDGICIRVSELSGNPAEHAAAILALRSKETGKEPKGAPSLQNALELARATLYHTPNHGTREVIVVFGSLLSLDPGDIHQTVRACVRDRIRVSIIGMGARLKICQEIVTRTNAGDEGEYTIATDQEMLKELLIATTTPPVIRSDTASTPQQPEKGAALMMMGFPSRVVEDLPTICACHGNLTLGGYTCSRCSAKVCSLPVTCPSCQLTLLLSTHLARSYHHLFPLRNWTTVSWQRAREKNSRDCVGCLTT…
>Alen_Al4_ctg01_-_Alen_Al4_ctg01g227t1	MILFPGYRETINRVSREWKGVAFFGHVQCVTERCQQMSALLARLRPYVHESDKALIADMMISAEEELSESSQTTSLVSLGSNSGERSAIQQFQELEEHDYFRMYLLDVPNGSLCDDNRDAMTSFFGSSSELQWLRAATMASPDMRSKGAGETSQMKIPHASTGEHISSYNFWDDTENTESNCNTCDDPYEPPHIETAKRLLSCYITVVHDKFPILHRETFINQSRGYLVSLQNGHLLKSSLKWQAILNIVLAISASYLGSAKDNSFTVVGDHATYQARAEALIFDKTTSADHPDIPHIQALGLLSFYWLSVGQASRALAVVGTAISFAYALGLHLRNEDPSAPASKRDLLGRIWWSLYSLENTLSVATGRPSIIADSCCSVPLPLAKVEDQGLQGKDRR…
>Alen_Al4_ctg01_-_Alen_Al4_ctg01g228t1	MAYKLIVIIGITGNQGGSVAHTFLKDPEWRIRGLTRDPGSRASRALSAQGVEMIQANLHDPDSLKGVFGGANLVFSVTDFWKPFFDPSNRAQAMTQGKSIGQYAYELQLEQGENIVDAVTREVYGLDDVGLIASTLCSARKSSNGRYQELWHFESKADVFPTYVQEKYPELAEKTSYLHTGYFFTSWQFLPERWFAKLSDGSIQMQFPTSPDMLVPHLDPRKDTGPWAQALLQLPPKSTLMATSEWLTWPDWIEIWGKVTGIKTSYKQTTVEDLDEHIPGGAGKEIGEMFQFSSDFAYNAFQADTLKKWDLEKMGLHVPTTCLQEYVESEDWVAAGMVTS
>Alen_Al4_ctg01_-_Alen_Al4_ctg01g229t1	MATPKDATNTIIMQQEEIKNKLPLDDTQDFDNASRGYIKRLESNIIYEGKDPIWNNDQYAFLHEGDSPNTVNPSLWRQSQLTSTDGLFMVTDCIYQRQTGEAALKLYRSERGEKAVKAIIYTHSHVDHFGGVKGMCTEEDVTSGRVKIIAPEGFLEHAVSETIYAGTAMSRRAAYMYGAVLERGPKGQVGAGLGQTNSTGEITLIAPNVIIKETGETYSVDGVDMEFQMAPDTEAPSEMLIYFPKSKALCTAEDATHTFHNLLTLRGAVVRDPHGWSKYLTETMDLFGDRTDVVFASHHWPTWGADEIANFLTLQRDLYAYVHDQTLRMLNQGYNGPEIAEKIVLPPALDQAWNARSYYGSVSHNVKAVYQRYMGWFDGNPAHLWEHVPVERAKRYVEV…
>Alen_Al4_ctg01_-_Alen_Al4_ctg01g230t1	MAAFSHLIRFEADDGKTYYGDLTKETPTREIEGKEVEVLEGDVKSGFSKKGSKAKVSKLLCPLPTTNIILCVGLNYRQHAEECNLPVPSNPAIFMKPSDALAGPLEDIPIHSDCQSNLDYEGELTIVVGKDCKNATKDNWQDYVLGYTVGNDVSARNFQIPASVSGGQFGYAKSFDKFAPIGPCIAHKEVVGDPQKLRYWTKVNGEKRQETGTDDMIFTVGDIIQHLSRGTTLRAGTAILTGTPSGIGLYMEPKGFVKDGDEVEIYVEGIGSIINKMKFE
>Alen_Al4_ctg01_-_Alen_Al4_ctg01g231t1	MGFKRRANAIASVEKKKQHKQPSPLQQEISALDDQNEGCIDATSSDAMSNVEMDDDDDAKVRWRELKAAKTEEEEIERYRRQQAGTHTKAEAEHNEDLHQVRLRRMRARKAGREAERKAAQTHEAAHELTLGADWNAYNQAQGNGDSETTKIEGSPASTSRASSAGMLITNARQRKHELRLIPGDRAAFFTSKHPSLKRTDSEIFPEADQPIPWRNTKRQRVLLNTDQSRIESDFILSDEFIDDVNTMLDFVAGWRKELFKEIRYSFKKEPENKNRRIKFARMRDDAWAVRLLKPDKLESERHPGLADAYTFDDLPDDCREYGCLEGCPRKIPMKEKIANLKRFREDQAENKPLHIMAKACNTASPAPGALLDACTMPPPPIPPRSDKRRVPYGVQDIN…
>Alen_Al4_ctg01_-_Alen_Al4_ctg01g232t1	MLAHLPKLVNWIMQHNDPVQGSDWPCRASDPNGRLPDMQENDQAILGMDQDLITGCVPCRLKAFMKQYWGKVHIRLNGEPSSFPYRQVSILPLHKLAERWMCRLPDAPQGDRFRPGETPSELAARRLASETADERAVRVARACNQQCADEYFEYLRAGLLSSIDPSNQRRLDEFNALFMLQRHEETRCFHCNEHLKTTEYEFTEETGFSNIKPVFEGSDDLLAALERSTWLEPDTNESLKCTSCKENGAITTRQIEAAPVYLRIHLDVSMKRGNDQYSVAKNRTPIKIPDVLDLTRHAFVPNAGREPWPLRYKLASVLYHAGPFVTGGHWTAGVSRPIPKPQRGRRDPNAPSAAYYFCNDETIQAWPANVGMNPLTVNPEKRASSEFNAVVLMYERLPR…
>Alen_Al4_ctg01_-_Alen_Al4_ctg01g233t1	MSSYLNNLLTNTTSRYTNLRRQLLSDENDGDTEEDSHISRVLRAYYTEKGRPFPQWLPPDPRAPQAQPAQQFVSSAGRQQGQAQAMGRGGGGLSDLWDNPAPQQQAQEPLSLRRGVGARAGGARPLQGRMGSSLTPEPQIQGRPLPSQRAGSYQSAVAADPSPPPSAGSGSGITAQERLKQRLWGSGRSTSPAQSTSPVGSGPPARGSYERPAPGGRPPYPDERSYSAGSSGGGRQQAPSGDYDPYAAGSYGGGAPQRAPPGGGRVGLPSGPRMR
>Alen_Al4_ctg01_-_Alen_Al4_ctg01g234t1	MASPAPPSPPSPSASFYDMSDDEEGEYNTIRHAESGRGVKLLYTKSKVYVHPSPSAKDNIPGFVALVQQKSPKNTNDARPASSSSAKSVSASSLLLAWMPESGLGDAYDTYVKVDLSDSASPPKTSYLVPPPPTTSSHTVTPGYAFAIPVSEIYSLLVRPPSLGWWFGSVVVNTRAGDSFPALFFHDSECQSTILQRKRLARETFDPFGDGGGMFWGGDEVLRWLKRYVTIERSGADPSIYLIEPTEDDKQSFGKDAPGSAKKNKDGEASSAQTPGKRDGGMDPVTKALKEARWNFLEKLSQVTTFTRRTAQAVADNPKIPPQVRRLIQNPEVQTLQDEFDSARIYLARWAMGIAEQSERERNQRIWTAKDVLAMEQGDLGDFEILDMDKMTMADRRKP…
>Alen_Al4_ctg01_-_Alen_Al4_ctg01g235t1	MSPFSGPWSRDLAVLKKSISSIPSDNKASFTSASNDTVDVFCDPEALYVWEADSDIDSLLQLISVLAKLCDLGVREPKDVVKGMKGAMVIIADDSRGRESFQRLCELVEYITGETGSKRLEGTVCAYANTCIVVVRGWNYRPSSDGAGDHHVERVVKRVGTALERALSASKTRKIVWHHGAVIETLLSFINTTTPSLRNAIVGISVTNSLHLTTGIKPSPAGRSNTVPDLERLRSYAKKLGIPVLFLDSSTQNITSPNLGTYMYFFAYYIHTFLPSSLTRPHLHAAQDELVTFAFRLRGASERRYGSDVVSVVKKHLDPRSKAWARRCVDARSYGKRECEAAGKESEVHHSVQLADAPFSLFRDIVSRDGGGVAAFARLAVGPASPAAAVKEVFIAAPV…
>Alen_Al4_ctg01_-_Alen_Al4_ctg01g236t1	MRFKAQIQNISTFTKLTASLNSLGPLAWVKLSEEQVCFTIIPEQGTQVWAVLSIDAIFETISVQSAANNVINLEVPLTSLNRALKSALNATSAQIRLTKKDNMPVLALTIVTTTSSNSYGAFPTAGPNNDDGFDAPFDNAFGGNRETVVTQEIPVRVLAPDTVASLHEPQTREPDVHIILPPLMQLKSISDRFTKLALADTKSGSGTATSRTRLEVAANMHGCLKMSIKTDAMNISSVWTDLSNPELDPAQIAGGENGLAVHPSTRMKQLGSADGRSEEGWATVRIDGRDWGKVMSVGRLGGRVIACFCHEHALILYVYLPNDNGDDESVLTYYVSSYST
>Alen_Al4_ctg01_-_Alen_Al4_ctg01g237t1	MAPGEDVERGRASSAAERQKSIVSMTEFEGMDEYTALQKYILFYRDPRAAGHQQEEAPKKKRWWQSNAGQGPTTDMAAEVPDDFVNTELRTGLSSHEADSRRKRYGFNEISSEKTNLLKQFMGYFTGPILYVMELAALLAAGLQDWIDFGVICGILLLNAIVGWYQEKQAADVVASLKGDIAMKATVVRDNQQQTILARELVPGDIVVVEEGSTVPGDVRLICDYDKPEDFELYLKLKAEDKFHDGDPEDEKDEVDEEKFDEENPITQGVSLVACDQSAITGESLAVDKYMGEVAYYTTGCKRGKAYGIVIATAKHSFVGRTASLVQGAQDQGHFKAIMNSIGTALLVLVMFFILLAWIGGFFRHIPISKAREGTDKSVTLLHYALIMFIVGVPVGLPV…
>Alen_Al4_ctg01_-_Alen_Al4_ctg01g238t1	MGRSTIPSALAELSNPTSPEAQVAALRNLKNEIVGHEQRKELAVTNGVVRPLAALLKEGATRGGKRRHSNGAAQELQNGSAPSSQTRRGKDDWTAEDELRFQATLVVGSLANGGPAFTTPLLAGQILSPLLEALRLGETPTRLLTTTLMTLNQIADAVAQEKPGSDANGQTLAAVVREQLYTRPVVDNIAEILAQTAGPSKANQQVLLATQLVTKTCVEGNQKKMLVDAGILDLLAGKLASIAAADELVPRTESSHSQREQVPPRFLSAIMEAIAAIIKNSHFYTARFLYSQPTQQLFGWPKERTSTAYDAQSSSTQSLWDKLIPRVQTITSKTDPYTKSWPALGSYTAVGGESYARLPSMESLQQNSSRSIITDESESPLFIWLMYVARRSEGAERLS…
>Alen_Al4_ctg01_-_Alen_Al4_ctg01g239t1	MNSNVARWELGQQSYDTRWGNQYPEAPHASLPYAFPEQPVPRLAEGFDQLSLKKVPKTRTSPVATRTKIIRHGSHNAPVRPSSSGGEANMPPNRPFASARRSGSYSQPTPLEEFRGSRQWPPRGYRQDDALDARQAEDFICAGASTFKGYGDAIQNAPVGYNRFYAVMDSEHQSRTDRAPFQKDAYRDISLNLMGASESEFPWLSLEQPCMAYAFGKSAGTSTLNYWASKSGSNPPPSKRTSEATPRKMKLLQILDRLQSLEGGLREDNPDEMQQYLYSTLIEDPARLNGRPFMSMEQQIQDLTDILLNPQWIDFSNPKHQVVAKWFDSPDQRKKQDFFHQLLLSVELYLRIQSEQHNNKYRRKLILELHPTIAWDLAVAQRWLENMSITKTRTSTTQS…
>Alen_Al4_ctg01_-_Alen_Al4_ctg01g240t1	MLTSSSPTISAPPSPSTSFHAAAHAHSHSHSHSHSHAHRSSYHASRRTSASSCAPSPRFAVTSQPPRRFDTPQTPKAVPLFAASPQGTKRAYTDAGTQYSPAGFPPTYHPPEQSTADQPAPASLTAPAIVDIQQPAGAAFAATPATEPPAPSEPALRVDPSPAIAQQSTRTPGEPLREEQEQQQQQQQQQQQQQQQQQQQRMIPTDAAPASNDEVPQSPAKRLRPPEANVKVMPLKYETCDVKDLGVLISDMLMELVHLNDGYPLRDGQLTRFHSRAPPGISVRDYLLRLIVHATLSPPILLAMVFYVDKLCATYPAFTISSLTVHRFLITAATVAAKGLSDSFWTNTLYARVGGVSVRELALLELEFLRKLDWRIVPKPEVLVDYYKGLVERGNGYTM…
>Alen_Al4_ctg01_-_Alen_Al4_ctg01g241t1	MSAFINGLSAIAIGNSIGLTHITEWSRLSDLSSHSDKLEERVSYKIRCFGDIKRIQFLPQELTNVSVGDTVTFEFYPPDHSVVQAEYGSACVPYSYADKNHEGKGFWTETQWVNTTADITHYNITINNTAPIFFYCAAPGSCIDKLMVGAINANSTQTLASQIKAAEDADFQLAVGDPVPNEATSTILNGPTVTATTTHSPSSGGSHISNGAIAGIVVGAVAFLVCCAALFFFVGRSKSLKEVIKRQDASVARSSTPGPDMGYMPHDQQVPRYGSPAPPYGQHNATDQYPSGWQGSPQMHQGHLSMMSQVSGMSQEQLDYYKHSQAHAQVAPVELHSPELGQQEFRAELEGGANKPART
>Alen_Al4_ctg01_-_Alen_Al4_ctg01g242t1	MNDVDVPMEDEIIDSTEFNSGPTDYASEFVIPTEVFPNPNMAHLPKNAQLPPYDSSKSALSMRPTSRDDRSDRMDVVRTTPRRRASPQVRIPPKPRSKALPYGTLKTGLVYDPRMRFHADLPSDTSPDEIHPEDPRRIHAIFEEIREAGLVRGPESSDNDENDEYCWRIGIRYAEEHEILTIHTKAHYDFVYSLQNMPEEEMHEWMRSLDSIYFNHSTYDCARLAAGGAIEACKAVVQGSVRNAIAIIRPPGHHAESSQPSGFCIFNNVPIAARVCQDAYPQTCRKVLILDWDVHHGNGVQHAFYDDPNVLYISLHVFRNQFFYPNLPDGNFDFCGEGAGIGKNVNIPWDDHGMGDAEYLYAFQEVVMPIASEFDPDLVIISAGFDAAEGDELGGCFVT…
>Alen_Al4_ctg01_-_Alen_Al4_ctg01g243t1	MVVKVGINGFGRIGRIVFRNAIEHNDVEIVAVNDPFIEPHYAAYMLKYDSTHGRFNGEIKVEGNNLSINGKTIRFYTEKDPANIPWSETGAFYVVESTGVFTTTEKAKAHLKGGAKKVVISAPSADAPMFVMGVNNETYKSDIEVLSNASCTTNCLAPLAKVIHDKFTIVEGLMTTVHSYTATQKVVDGPSAKDWRGGRTAAQNIIPSSTGAAKAVGKVIPDLNGKLTGMSMRVPTSNVSVVDLTVRIEKGATYDEIKEAVKEASEGKLKGILGYTEDEIVSSDLNGDDRSSIFDAKAGISLNKNFVKLVSWYDNEWGYSRRVLDLLVYIAKVDGNA
>Alen_Al4_ctg01_-_Alen_Al4_ctg01g244t1	MLRTSIVRATRTAAVPRAAPVTSQLQQFRQAHAISNPTLANIESRWEDLPPQEQADLWMSLRDRMKTDWHDLSASEKKAAYFIAFGPHGPRRPPPPDEGRKVLFLSVAVCFGAFAVFAFTRMFASPIRPRTMTKEWQEATEEYMKAQGTEPITGYKGMMVQSVSEKNLPPGQKLNDE
>Alen_Al4_ctg01_-_Alen_Al4_ctg01g245t1	MLPRPSFRASRALELSTSYAPRQSIRATGLQKKCLQGQRRYMGEFPRNYKTKRPDPLEEWRNPPPSKWPNRIRLLMLPFVGAIVYSMWTDSDSLKAETPSIAQKDALLKRENGVSEQSPMRLRMEQFIKQNQKQIVSELEKVDGTKFKIDTWQRPEGGGGITCVLQDGKVFEKGGVNTSVVYGRLPRAAIQKMRVNHKALDPDVDSLEFFAAGLSMVLHPHNPNAPTVHLNYRYFETADELGNTNAWWYGGGCDLTPSYLYDEDAIQFHSEIKQACDKHDKAYYPRFKKWCDEYFNNKHRGETRGVGGIFFDDLDETEKDQEQLFSFVQDCLSAFLPSYLPIINRRKDMPFTEAQKHWQQIRRGRYVEFNLVHDRGTAFGLNTPGARVESILMSLPLTS…
>Alen_Al4_ctg01_-_Alen_Al4_ctg01g246t1	MRSKFKDEHPFEKRKAEAERIRQKYNDRIPVICEKVEKSDIATIDKKKYLVPADLTVGQFVYVIRKRIKLSPEKAIFIFVDEVLPPTAALMSSIYEEHKDEDGFLYITYSGENTFGEAI
>Alen_Al4_ctg01_-_Alen_Al4_ctg01g247t1	MNYSQFQRSFRSLKPTQAARAFAPITKSFAPNAVRFASTDAARDGKIHQVIGAVVDVKFDTEQLPSILNALTTDNGGNKLVLEVAQHLGENIVRCIAMDGTEGLVRGAKATDTGAPITIPVGHGTLGRIMNVTGEPIDERGPIKATKFAPIHADPPEFTEQSTSAEVLITGIKVVDLLAPYARGGKIGLFGGAGVGKTVFIQELINNIAKAHGGFSVFTGVGERTREGNDLYHEMQETSVIQLDGESKVALVFGQMNEPPGARARVALTGLTVAEYFRDAEGQDVLLFIDNIFRFTQAGSEVSALLGRIPSAVGYQPTLAVDMGVMQERITTTSKGSITSVQAVYVPADDLTDPAPATTFAHLDATTVLSRGISELGIYPAVDPLDSKSRILDPRIIGD…
>Alen_Al4_ctg01_-_Alen_Al4_ctg01g248t1	MELVNASANSVNDAPAKGSNDGTGIVQLDPYLEPFTGALKSRYAKAQQWIKTIEETEGGLEKFSRASLQGPIAFIDRQNGDVLYREWAPNALRAYLIGDFNDWNRDATPMTKNNYGVFEVTVPGKNGQPSIPHDSKIKISLVVPNDHARQERLPAWITRVTQDLNVSPVYDARFWNPPQKYQFKNKRPAKPESARIYEAHVGISSPERKVATYKEFTHNILPRIKHLGYNVIQLMAVMEHAYYASFGYQINSFFAASSRYGFPDELKELIDTAHGMGITVLLDVVHSHASKNVLDGLNMFDGSDHQYFHEGAKGRHELWDSRLFNYGHHEVLRFLLSNLRFWMEEYQFDGFRFDGVTSMIYTHHGIGTGFSGGYHEYFGPGVDEEGVVYLMLANELLHQ…
>Alen_Al4_ctg01_-_Alen_Al4_ctg01g249t1	MIIRKLPVVVSPPARASYLALCTIGRRAFHTRGPAQSAYRRSDFSGQGFSSFYETDQPTRGPLGGTSSVGASHVTPKALRQHLDQFVVDQERAKVVLSVAIHEHHLRIQELRRQRDEQARLEAQAQRRASAFRHPVEDEFPGQQATVHAYDPTDPPSYSDSSYAPPTLASAEAEPSLETDADPLQIDKSNVLILGPTGVGKTLMCKTLAKTLGIPISMSDCTTFTQAGYIGDDVEQCVSRLFSAAGHDIEATEHGIIVLDEIDKIASAKMSYGKDVGGEGVQQALLKIIEGTTVQVRAKPEKSAGKGSGSTSGYPSNGSVDNTRSPLSGGSPGGGKDEVFNIRTDNILFICTGAFANLHKTILDRKSMGGIGFGASIRSSSSEASAEGVMLRGEEAARF…
>Alen_Al4_ctg01_-_Alen_Al4_ctg01g250t1	MDFSTFVNPADLTFDGSAQQPFTTANSTKFEAFDFSAPAEEELVHKHKDSAVDLTKLHQFQQEQDYASTRTKRVKVEPTVFDAFLDNYSSESNTPSPAADFDFVYSTANSPGEFAREESRTSSPEVSSNDMSAYTPGTAPSAYGYQSPEAIHIPQAEDSLSLKVTMDRTKTRAETQTKVTMILDPLPETYEWARFARQTISKPKQLATAEEIRDNQKKGGAVSIDFTLVCAVAVEERKDMELAFARARGEGEFPARAPRVDVSELEKDDPAHPQNGGAVIICNGCQEREKKRFGRKKKRNEEEEEEWSTYDDKRIIIVNEKEFKRLADADAAESKWGSGAKKVDFSMRIACYCRHQESKTPVGYRVIFTIRGANGELLTQCASEILQVTDDHKNKETSQ…
>Alen_Al4_ctg01_-_Alen_Al4_ctg01g251t1	MFNMNVFLTIALLVVLAIAIPQPCAHERAIDNANDEFWAKKPMHTTDLMASKSRSTLDTAIARTHIPTEAPTSQMPKVEVDEL
>Alen_Al4_ctg01_-_Alen_Al4_ctg01g252t1	MLSLPLVAPRADSSLWPSHRVTNPFPSEDLSTSPPNNTPHPHPQQRRTTHRTSTLLATLTQDENTLEQRKANVQRFGAGWIRPPGVTKTLQATTDEELEKQEQEIMARREQVMMDLAAAQQEATNAEERQDREDMEENGEVEERDLDDDVPEAEASASELSASDVSSDEEGSVSDTEDGAREQESIPFNEDSFIEGSMVEAEVSAMLEMEEAEMAGVLQDERDLDDDIPEAGSYEHTDSELEDSSDDDAASRPPGMSSVRTTRSMRRSSGFQSAQRSSGRRSSGRRSSGLPSTGGAQQNIGMGRSIGRGIDLGASLGNGRSSFGIDGSSSIMEGSSFLRSSPAVQRSSLRDQFLRAARGGRRG
>Alen_Al4_ctg01_-_Alen_Al4_ctg01g253t1	MSSRQPRFNQQALIDTTPLPDDIPKVKELGASSAPLLSASFFIGARCKAFNDDYMMCKTESNGRGELECMKEGRKVTRCAASVISDINKECLDQFRNHWQCLENHNQQLWNCRSEERRLNKCVFDKLSLEKTILDAPKGETPVHLRTRNIFATH
>Alen_Al4_ctg01_-_Alen_Al4_ctg01g254t1	MSFSFGNAGGEKKTGTLFGSTTAPAGGLFGGSLQQQQQSNTATPSLFGNSTVAAPQTGGLFGSTQQQPQQNAGSSLFGGQLGQPQQQQQQQPQQQTSSLWGQTQNQQQQQQQQQSQQQQQQQQQQQQQFSNSLFGNSLQPAPGLNQVQAQSLQQTREGLPQLRQSTAQPYAGASINGHREKSVQQQIAVLNGKWDPENPDCVFTHYFYNSVKPEEAPFYGPQPGEDERKWEEALSKKPAPGAIPVLARGFEQVAERIRQQQMAVTALRTRLHEINNSLSVLKDNHELNVASRITEAKRKHIVFTQRTLALATKVQILRNRGYVMDTQEEDLKKKLVELEKKTFDPVLGGRQEEIWARMSGVRERARILQEETEKLGKNIESQQNGELLSEEDQKALEKL…
>Alen_Al4_ctg01_-_Alen_Al4_ctg01g255t1	MLLKTVVLGLSTCASALHARSYHAVNTQPATNQPTVAPYPVASNGTSTSSAPSPIGTSGSCAPYWLESIKHQGLASFNPNPDNYTVFRNVKEFGARGDGVTDDTAAIQRAVTQGNRCGPSACESSTNTPALVYFPEGTYLISSSIIDYYYTQLIGNPNCLPTLLATSNFTGLGLIDGSPYLGTGTRPGRTGFGPTNTFFRQIRNFVLDMTKIPANVSATGVHWPTAQTTSLQNVVFKMSAAKGTQHQGLFIEEGSGGFMTDLVFEGGNYGFNVGNQQFTTRNLTFNNVVTAINQLWDWGWTYSGVTINNCQVGLNVSAGGPSAVNVGSITLFDSEINNTPIGIITARTNNSKPAAAGSLYLENVKLNNVGVAVAGPNSTYLQGTAGSTVIAAWADGHRY…
>Alen_Al4_ctg01_-_Alen_Al4_ctg01g256t1	MEDVEFNKSHSNSPLPEAGNDPSDALRPEIDEENSVPNPTNATTYQDMEVTEDKEEMPDQDDIEAGLSDNESALSDALDDDQLDEQFGDFDASNIAIEERAIDEDTVKQIGVHKRKRAAGEGDEPKKKKKRAEKPRRKKNKDGDEEGADLGDGGRKSKRSKKEGRVRGASPDEEPEANLTPEERRKRALERQMDAIVKSSSTRRRKKDGIDLEQMADQEIEDMRRRMAQAAEMDNEGRKRGEPARHKLKLLPEVVALLNKSNLKESIVDPESNILEAVRFFLEPLSDGSLPAYDIQKELFAALAKLPINKDTLVASGIGKVIMFYIKSKRPELTIKRQAERLFTDWTRPILRRTDDYRKKEFAQADFDPTRKVASGNSAANSQAAAQAAQRKKALEVPR…
>Alen_Al4_ctg01_-_Alen_Al4_ctg01g257t1	MSLPAAEVAADFRDALQDLRMNSRPEISNLTLIAKENTEYAQAISTELENHIRTTRPEWKLPSLYVLDSIVKNVGTPYTVYLGRNLYRTFMDAYLVVDQATRKAMEGLLRTWKQSVPESMDPRPVFPANVTGDIENAVNKIRTVAAQTQVPRPMHALPARPPSNVAWRDTSTPPQNVNRYPAPNDPRRPAGLPLTPQYGAPMPTATPPMPFQQHFQSPQPMSSIDLADLKAEVAQLVTTTQTSFAHNPADGDIRTKLQALLSLKQILDTQTLPPQQLEAVRKQVRSLAPAPAPMPTFAPPTPVQGYPQHSMPSGFPPIGAPPASAPPNIAQLLAGFRPPVQTTPQPTPTPQPPAFNLADLLKRVSSPAQSSSVPAPAPFQPPSFTGFPPSISTPVPALA…
>Alen_Al4_ctg01_-_Alen_Al4_ctg01g258t1	MSTMVKPKCGSEADAAVYDFPLHVAAVFIVFAASIGGAGFPVVAKKVRWMKIPPKVFFFCKHFGTGVLIATAFVHLLPTAFQSLNDPCLPDLFTEKYPALPGVIMMGSLFILFVVEMWLNAKTGGHSHGSATGNEFAGGAPPPGIQAAMNNAMQKRNSYDSQRTMLTIRDDKKGWVENTYPVGNFSFPKDHDEMEPRSEMPPWFIVFYEQYVRQREEMVNLVNRTMPALPSYPQEKAPEAQVSYFDEDVEQAVDPLVLKKQSLQITLIEGGILFHSVFVGMTVSITAEGFVILLTAIVFHQMFEGLGLGSRIAAVPYPKGSWKPWALVVAFGTTAPIGQAIGLFTRSSYDPNSAFGLIIVGVFNAISSGLLIYAALVDLLAEDFLSEEASHNLTGKDKT…
>Alen_Al4_ctg01_-_Alen_Al4_ctg01g259t1	MSSEPQTSANELSQSQVTDRTTAPITTSSAPVDAIQQLSRTTTASTQVAKDNATVTVDSADPLDLGKHRRSNMTQAQMKADYPQANKKRMKKFYTRQNQLIDQFLQSGDEERLAALDTVENGPKVKFAVNASFVVNFCLFIIQMYAAVSTGSLSLFATAADAFMDLVSSCVMLVTSRMAARPSVYKYPVGRTRIETIGIIMFCCLMTTVAIQLIIESGRALGAGAKEAEELHIIPIAFVAVAIFAKGSLCAYCFVFRRYPSVHVFFIDHRNDIVVNAFGLAMSIVGSRVVWYVDPIGAILIGLLILVSWAANAFDHVWLLVGKSAPKEFLSKLAYLVVTHDSRIEKVDTCRAYHAGQKYYVEVDIVMDETLPLKITHDVSQTLQRKLEGLADVERAYVH…
>Alen_Al4_ctg01_-_Alen_Al4_ctg01g260t1	MSHLLAFPPSPLPPNLTSPPYAIIGLNGTDLTRHLPRHIPLNLLLHFAPTLRPWILPPPHLAALPHSATHRALLSPSVGLDIHLPIQPAGLQCIIMSMLHASGVRVRGRQFDSLAPDVPTSLAIRDAWCALRLPGLGLQGLRVHVAAQMLMCEVEVGEGRERQALGCWDSSELVEGWGVVKECVAEEKVKDGRGRSEGVGGGGGAAFPYTGNLGVPRKEEVIAKRGDVKAGSLSSENKKMKEPPVHTGYQTIRRKAGKLFNPTVTAQTGKQACIMEQQATRHVSPQERQAREERDFAAMKRRLRRTRSDDSLRSVDTAVWDPQMSGEDDDEGTGGEIITIDLHNSDCDTDTNESISDALSKSLETIRLRREARLAKNASSVRTAREQRSLASLEQHGAE…
>Alen_Al4_ctg01_-_Alen_Al4_ctg01g261t1	MMPILSWPEAARERDLQRYYRPWLDAQSLVDSTVGIGEKGLTRAGYQPEASRDKSLTAFAQLAAFRLNVRRCMVSLIDSNRQYILAEATKTVSLFSPQAEQPEDDVWLGNAVLNKTDAVCYHTFSSTYTAKEENGEAMTAECMVIPDCRLDPRFADKDYVKSEPGVRFYAGVPIITRAGHRIGVYAVSDEKPRHGISAADMRFMQDVAAAVMEHLELAKDSDDRVKGERMVRGLQQFIERSSVADMRDEAGPRMSTMERQTENARLQTIEDDDASGTTTPSTATKHAQRKAHAESDTARIFHRAARIMRQSTMADGVVFFDTSAAGIKGGLYDDGDSAASSDDSVTNNTTDFDTADSTATARRRRRQKVAFAIDTAEQKAAAAEADSKPCPVVGLSLRQ…
>Alen_Al4_ctg01_-_Alen_Al4_ctg01g262t1	MSSLFDMPSAKRVRRDDLRSPDESPPSTPDRDIQDLLRQRMTTEFTYTTTEHDTAHGHDAVQSDEDEAELRLFAAPANAAPATLKVRLTSPGLDRGDGSGFLLKKPKSYYFADEPTSDEELALQASAIDGRTVLELSRQPWPACAVPWKVRTLTPAGMKKAVLVGHPPMLATVEEKDPKRTRKGKKARIALRKKKQANKDKQDERAKLAAEKEEAEREKRTRRNREKKVKKKAKAQSKKMEGEGTAEAPTEQTAGDADTNMQD
>Alen_Al4_ctg01_-_Alen_Al4_ctg01g263t1	MDPHALPRDVGSNDALDMRAGDSLFGPYDSEPERATDTPDPTSSMSTEVAATTHTTPATDPHTTIETPHEVEREEHASLPTNDPIQTLYDAYHDSYAHPISETSTHMQHAKALALALLQRHYPKSKDYLIEPAGLGPFSDYGINFRLKESKEPDSDPDTPPRKKPKRPAKAAHIHCSYQAPWHSTDRRNMTAFAVKQRVADVDNGLETSKYRMHTSLVIILDDLATFPRWSRDNDIVRGDVLSDLLGVIGHVDQGHGMLFFGPRLELYQYNASDDKTPVKPYAHPSWKLDMRTTDLTVVEEVLSSFTAQAVVYQEGV
>Alen_Al4_ctg01_-_Alen_Al4_ctg01g264t1	MVIRPVRVLQAARMISTLVGQSGREYNLQKVLQRHPKKPELSVCLAFCDKTPYVVKPVSESILEHLQEFRAEFESHPRLRIHVDKIEKESILVYEYFKTDLLALVENYPPLPLTARKKILKEIGSTLAEMHERNWIHLDVKPDNIFLNWYVDSSDEFHLGKIVLGDIDCALKLKGEKLLNYKMGNVMWRSPEGQLGRGVGKPSEVFSFALLCLYVITGVQSLHFDFAELDTEPELVVLFKLLSTFSPLPDALIKHVDDAKASELLTDLWQAVKENNVNGDFADWTEDVFPNLTDEAKRLILRMSNLDPAKRATMLEILKDSYWVEDEKT
>Alen_Al4_ctg01_-_Alen_Al4_ctg01g265t1	MDSKGRQSSTSKFFGRRHKDKPTPTDTRPPAPESPPGSAHGSQSSRHSHRHSSSQASVDRPVSLSAEGIFAKAGPISNFDYNQTVEPHHLNKGGGDFHQYPVFDPAAMPPTTYDRGATSSRDGPPRPPPHAGTTMTSQGQTVSGDRGVSIQQWGARDSSRNPNGSNSYYAATDSSAYTRASSDQASVYSNDSRTRGNSIYYPKTNSQTTFSSIGLDAGSLLPMATATPRDSHRHNLLHAGQSSPFGSNANLGQKGFDIERPPDHVVEKEFMNLMVKRGWKSLPEQARRQMEAYKIDKKWTLVYQDKLAEFKHDEKKRQTQRNTYGGANPDILIRAEEEGSPEWYVKKVMDKSITNKQMSSLEISLRTQPIAWVRGFIEAQGQIALTNVLTKINRRKGTG…
>Alen_Al4_ctg01_-_Alen_Al4_ctg01g266t1	MAGFTHFLRAILTPLFIALALYLAATLLLLPFIRRHRTRYSQYLPMPNTLSTHATTWRTTLSDALYALFMPSTWTRQPAIHVHDDDDDSSDFDDDEGEGMVGFDPVDERRREALEQRRSMVDEERRLGRELEQGFKDDSEDEEGVDETRRSLSRSRS
>Alen_Al4_ctg01_-_Alen_Al4_ctg01g267t1	MVFLRSASRLARPASSLLTARAGPRLTSGAAFLRQPNQFRTLTATASQQGKVLLVLYDGGVHAEQEPRLLGTTENELGLRKWIEEQGHELVTTSNKEGENSEFDKHLVDAEVIITTPFHPGYLTAERLAKAKNLKLAVTAGIGSDHVDLDAANKTNGGITVAEVTGSNVVSVAEHVVMTILTLVRNFVPAHEQIARGDWNVAEVAKNEYDLENKVVGTVAVGRIGERVLRRLKPFDCKELLYFDYQPLRPEVEKEIGCRRVENLEEMLAQCDVVTINCPLHEKTRGLFNKDLISKMKKGSWLINTARGAIVVKEDVADALKNGHLRGYGGDVWFPQPAPKDHPLRYAQNPWGGGNAMVPHMSGTSIDAQERYAAGTKAILDSYWSGREDYRPEDLIVHK…
>Alen_Al4_ctg01_-_Alen_Al4_ctg01g268t1	MPGDTHKRTHEGSAKMATTSTAAEVIAKQGDVIFHVGKAPQTEKKLLVSSVLLSYMSPVFAVMFDGRFVEGQALSPTSPRVVPLPEDDADLMAIVCKIIHAQSADLSVTMTPTQLADIAMLCHKYDCVEAVRAWTLIWVANILKGPMTADFEKSLTAAYLFDMAPEFQQLSRNLIRDRSGLLSISAMSNGGDFPPLLLLESVVKEQYETQNRALVALDPIVGAAPDMCEAAQLGIGIFFKELRKAGIWPLARHSVSELLHGFARIPNKQILKKKCSTHGCSCRKTDLSVASIFADVAEVYHTVTGI
>Alen_Al4_ctg01_-_Alen_Al4_ctg01g269t1	MHAITIILAFLLLALTADAGITQKDFSGIGNIYVLQSEDWNSVSPTKDRIGCLDERGKLVAATNKAACGTFTRSAEFPYTLSTKKGNCTFNDESQERNTDSKYGAGDHAWNCNATYSSDIYDELYTIDGFPYVFLCFGDVACYYDGKKVPARNEKLSLWQFHWGSQQMGITPGHIQLLLMWNKIGELPKRVEAADIPSPRVRLTDALQIPLLGQQRRLE
>Alen_Al4_ctg01_-_Alen_Al4_ctg01g270t1	MYAISIILRIVFLLASLALALPHDRMVNNEFIRDVGVLFSESNFMGDPMFLVTSKEERKCETVDPSILGGGLGSVQICIPAMCIFYKTNDCTMSEDSEDYYFQGPIDVDDFQALPGVACGSYECGSIAEMAGVIGVAAAASTNSEGGHYGRVSRN
>Alen_Al4_ctg01_-_Alen_Al4_ctg01g271t1	MMSNAPASTAKPPRPRSPHFPPHNAPRVWFITRGVSPIAIALAKQVLEHGDYVVAGVVPVEFEKGEGQSDDFKAFLEVVKNTERWRERLRVVGLDARVVGQCQAAVAEAVEAFGRIDVLLCAASEAVIGTVEELAQSSRTISLVDEIFEINFFANVNIIKAILPVMRERKNGHMIVITGITGHLGTPGLGMYCSSQWAIEGYCDSLAYEIAPFNIKMSIVQANMEVNVLTNRITSVPPMQEYLQEENPAPLAREIFSGLLDRLDSIENPHAAADVTSPTYSDSTMSPDATMAESTMGDLLSADTVTSLYAPLPSALKSSLIAETVHALTAIGGHDNPPARHIVGSEGVTAVKEKLMTISEELEDFIEVSNAVDIAKDYQSVEPSAFD
>Alen_Al4_ctg01_-_Alen_Al4_ctg01g272t1	MLHHRSVGFANIDWDAALKAPDLFQHLIPAGGTLPNWLIQLREDRLSGNPKESYQHKKKASVRATDCSRWIKKGNFHTSLIRKRKPEARPPKVGMARPANVAQYQRHSLQLISRVLNIRTNASPFTLILDDLNQRAMPLVSELVRRGLSRNVNVVVVSFEATRFHPAVRSVPAYGDETGEQILQHIRKALSEAKESLVVIDSLYELLSVKNVDMGALFNLVAGEFASTLVGVYHQDTIPDQDAHKAYAPQPLDLFKYMATTVITCKSFAHVLAAKAAKERSLPEPTHGLLQGAEGIVQCLDANDHRGIIIEAEFRRKSGRPESETYFLRAARRSDYNAPVSGMAFGTLRQEFVTLLDQVPAYSSNEVTGLVNAAANEMESTFNLGLTDKQKQAREGVVL…
>Alen_Al4_ctg01_-_Alen_Al4_ctg01g273t1	MSDTERPRDQAHNRDSRREPRGGRDHDNERGNTGSERRNRSRSPRQERGGRRDGGRYRSRSPFRRDEGGRGGRGRGDRNDRGRNDDRGPPKGPRGGPGPRQPPSNTSRPLPKAIKPDPFEDDEPKDVVMKEERIKPEGMDDETWEMAQVMGFAGFKSTKNTKVPGNDKNFGIRRDKQMEARQYMNRQGGFNRPLSPGRG
>Alen_Al4_ctg01_-_Alen_Al4_ctg01g274t1	MPRNSRHGSLWTGLTCLLSLQSQLPVASAQVAEIEKASNDSLLWGPYRPNLYFGVRPRIPKSLMGGLLWTRVEDYQTVQNTFRHTCEQHELDGYGWDEYDVRSGGRQTIHDPANRIDITTEFIKFPGGEHGGSWGARIKGTPREDASPDLTTTVIWYNTLEGLGSLEVEDPNRAETGIPGDVVFKGQTTELGDFELRVTEGKGAHPHFDHPSYDDKPLDRTLVHSGQVPDEALWQIKAVLFAHMKSQIDELVPKYGQENPPPPAQIYTIQHQPGAGNIHMVQKVFDGAFEFDIIFSSGSAPAKITADDMTEQIKSVTSGFATRFTDIFKPQAPFLKERYDEFSKSLFSNLIGGIGYFYGDSRVDRSYDEAYEEVNEGFWEEAAEARARNEAQSVGPNEL…
>Alen_Al4_ctg01_-_Alen_Al4_ctg01g275t1	MSSNNLPRHHILSRDEFLRNGINVNDKCNICLEGFDSTHLPANFSKGGSCHHVFGESCLRNWLLSSSGNANKCPVCRCILFRHESDMKGNEQEAEEEDEGDDDSYESEEENNNDPLLNEVTDIERAVDIMEFLGEQLEDHVNCGLPIDDSHLEGIILTVIVEYGFVLNHSFRLSNPLCIKMRGIMRQMLAAINANDGKLAGGGEVWVERMGDALGWQL
>Alen_Al4_ctg01_-_Alen_Al4_ctg01g276t1	MKVTVALAALAAAASATTELRGRQDGHNDKPCKKRPDVTSRKLEADITSKKLLRGAQQLQDFAYSYPDRNRIMGGKAHNDTVNWLKKELESTAYYDVTLQPFSNYVMLNGTINTFTIGGQAVNATLFEYSNSTTGLVTAPLVVVNNLGCEAADFPASVAGNIALISRGTCNFGLKSALAGSAGAVGAIIYNNVPGTVSATLGPPPRPEGPYVATVGISQEQGQAYVSQIQGGSNVTATLDVLTDVQIITTNNVLATSKCGDKNNQLALGAHTDSVGAGPGINDDGSGTVGILNVAKALAKYNVKNAVTFGFWSGEESGLLGSTYFVESLSPEESLKIRAYLNFDMIASPNYVHQIYDGDGSAYGLTGPSGSGDIEAFFEKYFTRVGVPYNATEFNGRSD…
>Alen_Al4_ctg01_-_Alen_Al4_ctg01g277t1	MAFSTGIGDRGGLRSPREEQSSFAALGLTSPLRSTFGSQAASSSAGDVRGQLHRRFTTNNIPTLNTPLSPIGQQRRQAAEPAEFTTATYHKLQVLEKKKLEYEYLKEQRRRFEAEMELIDLQSRRGEEEIHRLSSEVRYGKPAHSQPTTPPEHSDNGFPNAFSRPNRFSMSSIQPSKITPRGSRANSQVTSPPSSFFNNNGLPSQSVPGTRRNSDEDHDDFDNDDFTPLSPVSRKNNRMSMPVTNLDLRGRDNLPDLASVLGHIDTTGYLFGEEDKEHNPAASPDHKAYLQMSNTNDKFPILVRRGDAGNGTSLSASSAALDLALSQSPGPESQPTAWPGYRTHRQAQQSLPANSFRKGSQAEEYDNGHVNGQTTPKTNRQSVEFNFTSPLRSDNQRSS…
>Alen_Al4_ctg01_-_Alen_Al4_ctg01g278t1	MTIPGIKNPAIPYGSTIVVTGCSGFIGSHVADQVLAAGFKVRGTSRDSNKNKWLSDYFAQKHGEGNFELVSVPDLTKKNAFDEAVKGATGFIHVAHDMSGSGDPAIAIPQSVNMAVTALKASSAAGLKRFVYTSSSFAVTQPKPGVKFTVDESTFNEAAVQAVNEKGKAAGGATVYSASKVEVERAMKAWKDENKSSIVINCVNPNANLGPVLQPTHQGYPTTAGWTKNLWEGKYDQLKRVPEHYINVQDDAKLHVIALAHPDLQSRRLLAMAAPAPVSEIVKILRKAYPGRKFEDFEDEGTDECVNAEADNVERLLMDAYGHGYTSLEESIKANAEELK
>Alen_Al4_ctg01_-_Alen_Al4_ctg01g279t1	MKTSNSFTPELVDLFQDYLVKEALKNTHLMEALLALASFHIACETDDSAMSHDFTSTGMSYQTRAVAGLRAVLGSLSPEHCDPVFASSVLIMVCVMVSPFLPVGHSRTFNFVTEAILPLADILRGLGLVIETSQRKVQQGPLSGMFNVAWPSLPHSTVSPTIEDLRKLNASMSDSSTTSMFEHAIQALEQKILDNSAVFPWIALAGLEFIEHLKMQNGVALAIFMVWGALMNMADNMWWGRFSGKNLVNETSIILSFKGERYVCVTTWCRREVGLSEKA
>Alen_Al4_ctg01_-_Alen_Al4_ctg01g280t1	MRFATLSVLTALFAATTMAVAPQRSVIISFPNDTPDHVVEEAKEGIRKAKGVITHEYNIIKGFAAHAPASALEFVTTMGEQYKVEIEEDGIVTTQGEE
>Alen_Al4_ctg01_-_Alen_Al4_ctg01g281t1	MDDFKPDLLKALLDWVNTFDLPGRVTAWNQLEDGQIIWQILGDIDAEYFSESLPIFEESNDRRQSNNWIPRWQNLKHIERTVSTYIRDECGQLPVLTKRMIPDLQAGTWEGSTMLTAKLTLAVLLAAFFSPKSNQRMLQVMPQLGTKTAETIATAIQEMLALDKRMSELGVDPELTVGPNPSGYRTPTRAVSGTATAIGRDTELEQEAQLVEANKDRHALRTHVGKLQRELETSRNRISQLEEDLAEATVHIDNRAAQTGHSDDVKQLQDELAYDRQKIDELETDLATAREDLEKQARLLERFHADEGSKQDLRDELQLIKAERDDLSQRAKANENLKKKIENLTKETKNLEQLREDYQQARERLQQLEDVEERCEALDKVNKENSSTLVNCEQAIFEE…
>Alen_Al4_ctg01_-_Alen_Al4_ctg01g282t1	MAAFRSLTANRQPWQDFEYKALRGHSPESLDAKSRRSNVKLPLNLFEWSHGSQDGLEISDIKSVSELEARDPATVRVIFAPQDIPAPETVGGLLRLFDKFGIPSAFIHESMQNISQSFAAQKDIDGTTYVWFHFLCKTVSVTKGRIVHQQVATEDNGKAGQVLARAQKLSQADFNWLKPGFVLKIRKQQSPLMPPSRTRTSSSDATMAIASSEPKVELFCFGAPASLGDRLRKLKDVAICDDLMQDPYVLLEVVLEEMYKVLDQTGWAISQIFGDIETQTLEMATTPGKAKELPPDHFTGLHNLAKHTTYLRENCDSALATLQGLRHHHTAVTGDHPEPAQEFTRQALEYRKTLFQSTQRRLASLDKRMANIIQLSFHLVTQGDSRTMQSENQSMKTIA…
>Alen_Al4_ctg01_-_Alen_Al4_ctg01g283t1	MAYAAPPNPHGGGYNPNGSAFVPFNSQPPYQQAHGGGFVPGNTPYSTRPVLTQGSPAHGGGFNPTSNSPFVIQPVFAQPQLFAASTPAYKPQLHSSVQGTTNSYPHSAQYTPKPNPLAQLCSCLLEEISSHEKPQTLYFPLELKGYRHWFDPYTSWKWESPTAYRKPGLGYQKLAKHRHLDVFEREWVGDYDDRYISSWDGKVSKLVVQAVDDIYDNHFTSTYRRTFIRNIAPLYLRLANWPFNHVDPNKNDGKPTSEDMPMLCLKWFITSLAITFVISSPSPATLPPRNGGCYDPVPYHYYGYPKVARNTMELDNPRSRSDANPVAERILRPRYLCFLREQGEPALIMNVEEWITQYKAQRNLSYIFIAYTAEQFQSSDDYMALHQMADAAARNAGVM…
>Alen_Al4_ctg01_-_Alen_Al4_ctg01g284t1	MPNYSAQSIPDSSFDFKVNIGVALLQCTIAKHSKRIVRPVVNFLDAFSKVFDEEFSNISIDIFELYHLQLFVFLFILITVVRLSSIVMAKEDVTASRAFVGILVVGKKPLPETDLTEDVRAAVFVGEACRYVRRIEAVEADIASVEPAEPIGEEVISRSQIVSFHGSWGKARIGGG
>Alen_Al4_ctg01_-_Alen_Al4_ctg01g285t1	MEAPADVVPSVETPPAVQHDDALPKAALTPPTSEDNDPKREARMSSELSDIDSDDGEDIEPDHYWEGGKIPVFKPTMDQFRNFQRFIDKVDKYGMKSGIVKVIPPTEWRGSLPDLHEAVKAIRVKNPITQEFTGQHGVYTGANVEKQRSYNLPEWRAVTDEPHHQPPAKRGETRTGRKPAAEAPTRTRSTRAAPKTDDGTPAPRRRPGRPARGRRGIKKEQDDDDEDEAGTLDVPPTPTSPGAEDQKPARRGGRARREDAPSRPRGRQPKAQDEKKSVSSRRLNNRGAVNDYIDEAAFEDFDYHLEGLDEYTPERCKELEEHYWKTIWSGQPMYGADMPGSLFDDRTTSWNVAKLPNLLDVLGTKVPGVNTAYLYLGMWKASFAWHLEDVDLYSINYIH…
>Alen_Al4_ctg01_-_Alen_Al4_ctg01g286t1	MASEVVSKLQNLVTGESKSARKKKAKQDSSATAVPAATENTSSEAGATAGSDPTGNVNGDSENSYIKELQKNIRNINKKLNATQKVDSIIAENPGVSLDDLAASRKINADQKAQAQRKPKLQAELAQLEEQVAQYKKFDQEYQEKHAREKELLQKSHSSELEALREAVKAEAVIEQKKVFREKILTLSRFLRAAAARRQLEDDDSDLTKAFEGALLQVYGGDAVAVAAAEKLIEGTEDGVPSTEGVLLSVTYSQVKQAALEEAPFAAEEAWVDDVAQAQPTSPETEAPEAASDPTVTHAGLTELDAGSATAGGVEAEQSTAPAAASIEPEAANAAATAQWDKQASGQDEPLSEPFEIIPRDPAETNAVHETAPVTSTQSWADDTPEPVAAQTPANDGFS…
>Alen_Al4_ctg01_-_Alen_Al4_ctg01g287t1	MTASSHPHFDHDDALGLAEYGLTDLHPAHTNALGPSPSTSIMAQFPDFDRTFAHTPNRQYPPDPVHRGSVGGVSDDNMSGAGSVHLRGLSIGGSPGLLAQDGRTTSPESTHAMGIMAIGDMHNASTQALKVEGNDSATLGATPKRPKDSEQDAPQWSEMKTKAGKERKRLPLACIACRRKKIRCSGEKPACKHCVRSRIPCVYKVTTRKAAPRTDYMAMLDKRLKRMEDRVIKLIPKESLPSVANVGRSVVKPAIPGAPPKTPATKKRAAEEAFGNELDEWAKSKGRDTDATGMASRSKESDENKLLTEGADSLPSKEIQEHLAEVYFDYVYGQSYPLLHKPSFMRRLSAGKVPPVLILAMCAISARFSTHPQLRTEPCFLRGDDWAQKAREIALKRYD…
>Alen_Al4_ctg01_-_Alen_Al4_ctg01g288t1	MLCSIIVASLAALVAAAPMDMENLKQAVDTSYGAYGKYAKYNDYGTYPGSVEEAAHAMANSKRDMMKTDVKPAADTSYGAYGAYGKYSEYETYPDGVEEASVRMKKGMMQ
>Alen_Al4_ctg01_-_Alen_Al4_ctg01g289t1	MLNIFPRLFRSTPKHIRPRLSPSDTESPDNETLLPSSSTTSLALKQSPHRHNIEYQVALKTLVICSVVYLSVGFWIAHSVRNTQFVTNADEFCMAHVSQYSPVVKDVKPGWHTKRFNGSFLHENVYRQSAGPEVDAAWEALGVGFRSVVVPESEAEQSGIRRDQVKISREYGGGFPANVEGLHHLHCLDLLRKALHWNYDHYLAKGEGPFVNSEYVVRIHTTHCLDMLRQVLMCNPDVGVLGQVWWQPEGDPSPMAFVDFNTKHRCRDYEGVRRWAEEHQMPPERDVDMTRFYEQPKPGDIVYTAIP
>Alen_Al4_ctg01_-_Alen_Al4_ctg01g290t1	MTTLTSAKTAVAPAQVQKFVADSAKLSSSTHLPGLHSLALQIHHNLQYQHYWTDLKVHTHSPLTKEPLPRPLVSGLPPQRLYVHPDEQVELLKNADRQRKAAQAAGEKSGLEVKAQPEREWVLPTRLNEQWTLRRLAEVFDDISMVPPQPSATAQDVAANPWRTTKRVVLATVDTDSTVVYYIVHDGVVKPRQN
>Alen_Al4_ctg01_-_Alen_Al4_ctg01g291t1	MRSTTIGSTLLLLAGAVAAQQSESIVTEIPSSLIQTTEQVFTIQTSVPTGASSVCYAVCVKEPCYACSTTPSDGPTMSVPPVSLPVPISVSDGDVTMTLPVESLPPVGSEPTPSVTSVVTPPLPSTISQTTDPLMSIPQGETPESTGVISTSSASGNATASASRSAPAEQTTAAAPPSLKGDTTSFMLALGISGVSIFFGAAWTLL
>Alen_Al4_ctg01_-_Alen_Al4_ctg01g292t1	MASSNPHSSAAHANVSTPVPFPQPEGLHDSSSPAPIGTSAGKQRARTSTNTSSASSRIRSASIKLMDADPPPGMWAATGSVASKAPSLVDIRRGSFGSEGWDEQRQREHRRGSQESNERPANNRKGSSGRLGVEPFPALTEERSSFDTREHSSNYHSQDDAKDVGAGIIEPMTSHLTDKSEEIAVRQLLRNSCQYANGYIPPPKLPWTQSFMIGLKGFWKWFLTIPGFLITVYGLNVVAWGGMLFLLLCNAAPAMCTPTCDDINSPRRIWVEIDSQILNALFCVTGFGLAPWRFRDLYWWAQWRLGGTQRKLIGIRRLAGIHRGWFRLPGSEQLPEEADATKVNSEDPAVPIPASKIPDPPPTGFRASPTISWKMDFVLWMNASNTFFQILLCFYMWHY…
>Alen_Al4_ctg01_-_Alen_Al4_ctg01g293t1	MASAEYYLGSQGAQQYHSQHAPTPYPPLQSQYQQQQPPAQQWPRQQYNTPPYNSTPPPSYSPYSAQQGKQQLQAYPPPPPPQQQQQYPSKGYQGATAPYFPPPPQHPNGYLGAPLQHVRSHSQPATRVRFADQESTALGSETESDSDSSPRRRHRHRRSRDRTRDYDRSRDLDRDSDYSDRDHDRSRGHRTKTHQKKHENRDTFLGAGAGGIIGDAIFPGLGTAAGLLIGGLGGRKYAKDRRSHSEEGRTHRHRDAYREGRDEGREDREHGRHTHRDAYREGKEDRRRDRARDSGYGYDDWDVESGYGNGRDDGRGQYYDGYDEGHKQRGKHRKYGQQGWDEDTATFKSGAVVR
>Alen_Al4_ctg01_-_Alen_Al4_ctg01g294t1	MNNNSLRPLLPATQPRSPPPSGPSSKRKRVSVACNECRQKRIGCDGVRPACAACHRRDRRCVYMNEEDLEMRPTILKRENIALREKLAAFQDIFEQLQSRTQHVAHDIVQRLGAGTNPTDVLKTLRGESPHTLLSEQAAARAVLPAIHSDCELELLVRHPKAYCVLDLPVVAQDTVNTLFLDDRSSHASQLEVVTSTKDSFNHPRYCDSRLEKLNIDFWTSVPISNHHAASATSLYLETHHPIWCFFDASKFIGDLVQCRVDSSSTCSPLLVSSLLAFALQGYSSIHPETAKYSYQFEQQAEKLFSAEGTVDSLPTVAALALLYTTIAVHADVPRAMKYLIAAEDAAKRMNLFREPDPATFGSPKTIAATSQTAWGLFNFFVQMSQFQVVAPLEHPPTI…
>Alen_Al4_ctg01_-_Alen_Al4_ctg01g295t1	MQQERPLRPLLPTVTRREVTPPQPRRRNRVASACEACRTRKTKCNGARPVCWECQKRSTRCDYAAHLTETQGQAVKRRHDALQAQNDAYAELFGLIQTRPDGESLEILRRIKMGANVESVLRHVRDGDLLVQLRVQPETRLRYTLPYMDSMPAFLLVPDNPYLTTPLYEATFKPSSSSPSTVTSNKTGTGKYVSPYMIPSHAAEVVEPILDRTYARQWTNIISDDGLFRRLITIYLSHHHVAFFWFNKNLFLEDMAARRTQFCSTFLVNAVLAAACQAYKGIPNLAKFWMVNNLQNRFLLEAKRLWELEMGISRLTSIHAAQVLHAILNVNGLSTVGDFYISQAVVMAHNLRLFEPASVQSDSRLRRGREFTAWGLWLWQVAASYYYRRAPFIRDPPAF…
>Alen_Al4_ctg01_-_Alen_Al4_ctg01g296t1	MKLITLAFAALSAVTAAQGYYDVQSTGFRLIIKSSNSTLNGTALGACHQGAAIEGLCPTGETVQDPPSSYTTFYHNVSSANDQKPNAADVDGILSWILRAGGNLTVPSAMSMNPTPNSNVVNPTFYPGVSESTVIAFDTDGCTYISTWLDDTVSPPSYYDPPRKVKNWYVCLTRWSYLYQTLSWKVGVTGQPQNPSCQKVDVVRVFN
>Alen_Al4_ctg01_-_Alen_Al4_ctg01g297t1	MVTMAHAVSIVVAGASIAALATNPAYCKNMLLGLARAMGVGAPGGVWRMIAIVLALANLKNLPFVWHIRIFRALIYQIYFQPTPIPPHALFQPVITSTRTPLLETDYNLHKSNSTYFSDMDISRTHLFTAIIRNGIKKNSRLYGARKSQLDGAIGATDGTRGNHIIALGGIVCNFKREILPYKKYEMWTRLLCWDRKWFYLVTHLVKPGVGKPESWTLQPWKKTRKPSKDVTEEELLKAVYATGIAKYVIKRGRITVPPEQALIDADMIPIKPEGWVWQGAEANANGLLPKPIEGAEWNWDIIEAERQRGLKVAQKFAEMDGMHEYFDGGKNGALGEYPDLLF
>Alen_Al4_ctg01_-_Alen_Al4_ctg01g298t1	MFKKKPNIKPLSPLKSSDRRRTADQIISDFGIEIPVDPSADPEDKAASTAGLTAARKSILPENALSARFTTTAGPDLRQVSGTIYVGSHEGTGGEQRILWVKVGEQMYPTVYTLWHNPKIIPLLYTPLYVVEKLQGGADLMTPGLQRGPPFPKKATKGAIVAIASLEAPTVPMAVGTCVIDVSSLGSTQGMKGHAVETFHWARDELWSWSTGNKPGRDPPALIEAWDEQTDDDTSLAERTAAVDLDDNDGGVSLDADPTERSKAEQAQGVEGEDAPSNKDFVDLVEDKELTTKEIDDAFKNAFFYGVRHHMEHNRNQPNFGLDFPLSQSTVMALLVQPFLPTYTPARTASLQIKKSSWKNIRKFIKHLDKQQVVKSKDRDGNEVVIQDIDFKDRQIEAF…
>Alen_Al4_ctg01_-_Alen_Al4_ctg01g299t1	MSPISNPSKRWVQGEVVPKPTNPGELVLEAWAMGYLVGSLVIMGFITLANMRRGVLLHKLILLELVMGLWQGFYLFFNSPVHAWWLSVSAIFLNASWSLHNVIAWMKIKPFLSKPVSYVFIGSVVLVQPYWIAEIYANFAYFHGVNTIFLRTRPWEALCRDPWWIITTVYLFWIIKTQYEMGLKEILRISPRFAIMLLAMVMSMVFILLDILCVTGAIRFVGLATGINPFWKLAFVFKCLTDSVVLDDFKMALDRLRAFKISRLGSFSGDMSDSRNRNNGELVATWEEMEREANGLQQVRSPDGDYIHSSNFPFKPRKHRKPKDSIFSNDPIDPSAGVAPEDMVPSALEDTPMRTLERAHTDIRKPQHHFMDDLDSRTRGMTAESDYAAALREVQRSSR…
>Alen_Al4_ctg01_-_Alen_Al4_ctg01g300t1	MLSKSLLLSLLASTVAAAGVTGTPFGFAAATTGGGDAEPVYPTTTEELTKYLTDDEARVIILNKEFNYIGTEGEKTEDGCRPDSNKCPGDGGQDAINGADWCTKSSYPSVSVTYDSAALTPINLGSNKSIVGEGTKGVIRGKGIRVANGAQNIIIQNVHFTELNPQYIWGGDAITLVGTDLIWIDHVKTSLIGRQHIVTGYDPSKRVTISNTEIDGSTSWSASCDNHHYWALLFLGTDDTITFQNNYIHHTSGRSPKIGGTDKGTLLHAVNNYWYDNTGHAFSIAPEENGRVLAEGNVFEKVTKPIEDGVDLLYAVTDDGAACSSPLGRKCQVNQLTGSGDWSGSATDFLASFKDEGVKPVAATEVAASVKSNAGVGKL
>Alen_Al4_ctg01_-_Alen_Al4_ctg01g301t1	MAPIHMQDEFIDDAKDDIPVAGLQGELSLKGRFLFRLGRLLDAELVVPETKGSQTVHIYIKPLVGSASRNTGYDKRLRDFTEDLQCTLVDLARATTGPEREQASRDQWDVILLYVSQNTEKTVGMLQQIFESYRDRFGALVLQTLGLDDVDEKGSSLDTELADLVIRLHQLARGYEGSIKAQNDLIEFAWNLPHRCPDLAVQLRCLLGSTFSTQLYRLVGDLGQPLRTHHTLIRAATSFDIFQTLKFHLGSPPVPSCRAVNSPRKNPPTRQQQSQPLQHHRIASPTHILNPSRKNIMDIIRPYLPKEDRMLGITRLQPEQKQAAALLIGSVLSGLPVPVGSEAYYQFGFVTCRNESEESTLSRYYRQFLDTTLHPTIVFKSIVKALEFGTLTGLLRNKG…
>Alen_Al4_ctg01_-_Alen_Al4_ctg01g302t1	MENGEIFTSLEDIAAEAKARAEKQRVGDAQLGGPKPTVTDVKTAKKAGEVHFKAQHGIVVAFFTSSVLHVLGIYLFTTGFLLTRLVLPHKSECAVPPIELTRSYAAGDAGTGCWHPKTYDKAVVVIVDALRYDFTVPFEAQFEPVDLEKQAGRAQAASSEKNIAPRHFHNAIPVFYETAKQSPKNAFLLPFIADPPTTTLQRLKGLTTGTLPTFIDAGSNFAGTAIDEDNLVAQLKDAGKRIVHLGDDTWHALFPGHFESNLTHAYDSFNVWDLHTVDNGVTEHIFPLLKAENSSKWDVIFGHYLGVDHAGHRYGPDHPAMAAKLNEMDAVFRRMMEEIDDNTLLVVMGDHGMDAKGDHGGESDDEVQAALWMYSKRGDFGRIDPSSVLPPAHAKDRSV…
>Alen_Al4_ctg01_-_Alen_Al4_ctg01g303t1	MMNLKDLAARSEEGDGSNNLTVALLTTLAILVVLALVLMAALIYLRNIRRARKQAEQDPQLPLYEKRESGRRLTITAMPYGKGRESVVVYSEKQDLMSSAASSPTSPVPEIRITFPDEVDESGKPQSGRVVVVRVGEHSVGLEPVNDDLPPYQRDASDRFDSLDLDRIGGLKEKDDKYYA
>Alen_Al4_ctg01_-_Alen_Al4_ctg01g304t1	MATMTGSTRNRDFAGGISLNNTDTDRSTYTWGNSIWNSKPVGSGFGATPRDNSRPRDGNALLGATADIAEGKTGSGSLVSSSESEWRQSRPSQVWGDNSHIRSSGVSPARKRSVAQAQNAPQFGENPPSLFSVSRTASVNHGKGARALKPLLDPTSTNFTSRNVDSLSNGFSNFGFGQAELSPQRSDPAVSSWPDAAVHSPIDDRRSVTGSDHYGTTSGAPSRSGSLPPSRHGAEGGQYNPYADSFARFTQSGTRQTSSFSHANTRPFPERNGSLHSESLQLAQAQMKLEQEQEPRLGAHRSSFSINAFTPAFTPAGQVLNDPRDPYQDVQMPVQSEAQGIRSSGTYTPDSFTNGPVSDPNVQFRSVNYDTRSAPNGNTAVRQSPFYTHAHTPPVHDYL…
>Alen_Al4_ctg01_-_Alen_Al4_ctg01g305t1	MPAALPTSSLSAMAKAITSFLFGDIQLPTSLSHYATFFAGLVTGSIGASILHAYLHRNKCDRAKIQLAVYHIIRLFQQDPSYQAQLQHPQELLRRMEPEVLRMLNTHLTKNEADKVAKELKRAYEAPQAEEHGRKRMREDTGGALREQMELDTVPAHRQAQRGFLPELGPDQARGKNECTEDGVTSQPENEAASSLEAQGSRSDSLVEGDDLDDYNLPTPDEKQLQVEHGQYDEDMMDLDLPQPNVITTPGPHYRQSYAPSPESSSTFVGFASTPTPVPNDDGYLSDDESEVTEEWDDLETPVAEPPKMSNEAKSEEPMKLAQPFRRQGYGFTYDDPDLYSSSSSEEDASSPTPPPDDYTAPDWINNMFKKAEDLTSDDRHVEITSPREQQTTSHPPTV…
>Alen_Al4_ctg01_-_Alen_Al4_ctg01g306t1	MSLFLPFMLLLALFWLAIGIMLAKFLAQKYRGKPWSKRAVDAQYIYGSALDNDRSAGVHYGGGERVGFAGGYGRGVAGWGGLVRGGLRGCEDVGGQREEVVCGGCGLVGL
>Alen_Al4_ctg01_-_Alen_Al4_ctg01g307t1	MATESPPGTTSTDELQVTLTHHGKPITLAFAQDATISDLSDRISTELSIPPSNQKLLIGGKLGLQKPPFKNPAIPLTDFNTKKITLMGSTTAEVSSLNASISAASAPRRLGPVKAATPVRSRDYKRMQDDATYTFHTLRPLPYLPNPSRSLAFLERLRDDAGIKAAMRTHKFSVPLLTEMDPAMHTTQESRTLGLNRNQGEVIELRLRTDAYDGYRDYKTIRKTLCHELAHNVWGPHDRNFWELCKQIEREVERDDWRSGGKSVGNQEYYEPSEEEMNMCDHGGWTGGEFVLGSGGEGGTLVSSAGGSVATGSLNRREILAKAAEERAKKTKQADEESRGAGSAS
>Alen_Al4_ctg01_-_Alen_Al4_ctg01g308t1	MSSRNPANMKPLSTGERRSATANPTSTARPRVASGMGTAAELRERRSEKREVRERETEVRRTRSPLKPATDGRPSTRSRPGKQAREPERPSRSATSRQPSEQPAPPWDPQPSLVPHTSAPLASRISIPPLAATAPAALQPPPLAQLSLDAQEKAVIEDLLFVFMGFEGQYLRFGDAYNPHDEKDRLLGPQFKLLPGLDPSLKDLTKAMLRTATHYIAVETCVDVLSRDQYGAVNHALCAAIRRLLKDYLTLIAQLEHQSLTNHAFTLHVLNLHMKQTSHMLFQLYTTGIELLKANGILQDEKDDDTDDDTNDFENILESLREGGATVKKMCKGGSVLGLITKRLSSMSGDPAARTLLTTLLREASRPYMAMLNEWLHHGGIKDPHSEFLVKEQRSIKRE…
>Alen_Al4_ctg01_-_Alen_Al4_ctg01g309t1	MAEEKDIQPSAAVHQQPLYEDHEQDHKGAADKVINDARLATEKEHKMTLWQGIKLYPKAIGWSVLISTCIVMEGYDVCLLNNFFGFPQFKRKYGEQLPDGTWEIPAPWQAGLSNGVIVGEIIGLFLNGWISEAIGYRYTVIACLFLIICFTAIFFTAQTVVHLLVAEILCGIPWGVFQTLTVTYASEVCPVALRGYLTTYVNFCWGLGQVIGIGVIRAMVTREDEWSYRIPYALQWMWPVPLIIGVFLAPESPWWLVRKGRLEDAKKSLLRLTSLDRETDFDADETVAMMVHTTALEEKITKGASYMDCFKGVDLRRTEIVCMAWAIQNLSGNAFSGYSSYFLQQAGLDPSTSYDFAMGQYGINMAGVFGAWYLMKCGVGRRSLYLYGLCGLCAMLFVM…
>Alen_Al4_ctg01_-_Alen_Al4_ctg01g310t1	MAAAATVRAPLRNAVRVIIVVVEFQDVKCPPGTIERTQDLWFSTGGKIPTGSVTEFYSEVSNNAISMTGEVIGPFTLKENMSYYANNQSGMGWPEPNSQTMADEAFQAAKKDAKIDFKPYDNDGNGYVDAFVVVHAGRDAAETGLGSDIWSVKWVLPQEQEVNGVKVFGFLTVPADAKCGVCAHEIGHLVFGWPDLYDTDSSSAGIGSWCLMSAGSWGGGGDRPVHPSAWCKSNQGWVETVVETSNRQLPLQDVKVGFKVHRLWTNGDANSQEFFLIENRQITGSDEFLPGKGLLVWHIDTRVGSNTDENHPMIKLMQADGLDQLKNNNNQGDAGDVYPGATDNRKFDSVSKPDSKSYAGTETYVSVTNIPASTTTMTFDITVKKSDRPPTSQFDPNTW…
>Alen_Al4_ctg01_-_Alen_Al4_ctg01g311t1	MYFSTIVSTGLFAATVLAHGNITSPPARLPGPAMAKVCGQAAVAAINADGTGPLENIPSNGSPQCNIGLCKGAQFADNQKNVQQYAPGQQVNFAAVLPIPHEGPCNISIIDTASNTMVQTLLVFDSYADENLAQLPPNNTQFSVTMPADLPAGSCAQPGACTMQWFWFGTNAQQTYENCVDFVMTA
>Alen_Al4_ctg01_-_Alen_Al4_ctg01g312t1	MPSKIQIAAVLGAVAASVNAHGHIAAIKVDGTDYTAYDPSFQYQNPAPEVIEWSCPECQDNGFVEPSMYSDATKIACHKDATAGAKVAKVAAGGTLDIQWTTWPESHVGPVIDYMAKVEDATAAKAADLNFFKIDEAGYEGGEWAATKLIKNNNTWSVTVPTSIAPGQYVLRHEIIALHSAGQENGAQNYPKCFNLEVTGSGTETPAGTAADKLYTPTDPGIEVSIYSGDLSGYKIPGPALFSGASSGSGSGNSTAASPAASSAPAATPAAVQNNAASTPVASAAPTSTGSSDSSLPETFTLETFISWLEKAAGSSSAKARRHARAFRG
>Alen_Al4_ctg01_-_Alen_Al4_ctg01g313t1	MADQSATKQDGDITAVHHTEGRRSSVASVDLNKNVDAKVSNPLTGVPYETLMRDVEDFAHEHDLEDIIGHLKKGALVAQNPNGFDNIEMLVEEDKQHLRFEKQHKWKHPLQLYVTIIVCSIGAAVQGWDQTGSNGANLSFPVEFGIGEGDTEGSPNRWTHNLLVGLVNAGPYIGSALIGCWVSDPCNYYFGRRGTIFISAVFCVLTPIGGALAQTWEQLLITRILMGIGMGLKGSTVPIFAAENSPAQIRGALVMSWQMWTAFGIFLGYCANLAVYQVPVIAWRLQIGSAFIPAVPLTIGIFFCPESPRWLIKKNRYRKAWQSLVRLRFSPVQAARDLYYIHAQLQVEAQIIGKSNYLKRCIELFTIPRVRRATLASFVVMIAQQMCGINIIAFYSSTI…
>Alen_Al4_ctg01_-_Alen_Al4_ctg01g314t1	MATGIEIAGLVLGSLPLLLAGLEFYGKGIAVTKRYRKYSTEIEMLVGELKCEIAVYQNSIESLVLGIVEAKNVTKFLADPGGELWMEVSFERKLKKRLGASYDSYLDTVLRLRIAVENFKERLKLDSSGEPQFSDENAFKENYKRLKFSLSKSDYSDLMSRIRQANTNLNCLNTQRRNIEAQQRAERSSIPNFKIINERAQGFYSAINSGWTCPCQSDHAVSLRLEPRMEDVSSDSDDDEAPMHNPFHVLFQYGHSQSAAKSVKLSPWTWDEADVHVTCKRVTPIPDGTSCGVQTGKGVRFASQAKRAVEAALEPEPNLQPIKDLCSAIRTLQKPQRDVCLTLLENEIAKQRYGLKIYPTRTLPSDTEQWSVSTLRSVLQRKRRFPNRERVRLAIILAS…
>Alen_Al4_ctg01_-_Alen_Al4_ctg01g315t1	MASAIPISAAVDDCARAFLSLASSLEKPTRFAEQVDAEEILDEFDRFKLWAGNIAAHRKGRRSLENRLRDAARLKGETHGLLVLLTNALKKALAIADEACIPWDEETYSDSESEHSDDDTSNPDLQGYTELKQLYASIKTAITSLMRISMAIREPAPNSQSRSIDKSHFEQHDIQHVQNKFPSASPYLTERLGHAISSRRQYLTYRETHHEKLTKGIDKLGLEAARTEFTTNSTEATRLERTASFNIMDGNDDDDDTASQASYATSIDATVRAPKLPKEAREREHYDCPFCFALVAIHTTAAWKRHVYQDLHPYCCTFANCTTADKLYDSRHAWFAHELEAHHSSFQCVQGCSKVFRTESEFESHVRSKHEDLAAPAVYSALRRASARTPGLTEETVCK…
>Alen_Al4_ctg01_-_Alen_Al4_ctg01g316t1	MRAVISSFRSSCRHVRQLPCAATWTSLSRLLCTRTAPYAVCRPLHRPVSLTQRRQLHSPTEEPTIYALSTASGKAAIAVIRISGPACRQIYQALCPAAAFPKPRHATLRKLYSPHQPPSPATLLDSGALVLYFPSPNTVTGEDLLELHVHGGPAIVRAVLAAIPQCSPSRLGTVVHSAVHSIRYAEPGEFTRRAFANNRMDLPQIESLGETLSASTEQQRQISVRGTTSSLAVRYEQWRMLLLAARGELEALIDFSEDQHFDESPAQLCASVANQVQGLRAHMEAHVANAVRGELLRNGITMALLGAPNAGKSSLLNRIVGREAAIVSQEAGTTRDIVEVSVDLGGWLVKIGDMAGLRRAGLVGADAVGAVEQEGIKRAKQRALESDVLIVVQDATTEM…
>Alen_Al4_ctg01_-_Alen_Al4_ctg01g317t1	MASDEIVWSIIGTDFCSYKLKTTKDQTFCRNEHNVSGFCSKQSCPLANSRYATIRSDPKTGQLYLYIKAIERAHLPNKWWERIKLPNNYTKALEMVDSHLQYFPKFLVHKNKQRLTRLTQVNIRIRKLAKEEERLGERLVPRLAPKVRRREDARERKALAAAKVERSIERVLIDRLRSGAYGDRPLNVEPNVWKRVMKGLEKEGQLERDEDLDDGELEEDEEENEYEYENENGVGQVEYVSDIDGESDDDMEDFEDWVGGQSPDDGSGDDSDDSASPSGSEQEDESEGEDNDALKKALANLKRKRPAAPPSKPKKKPSRDPKGAKREIEYEIEREPAARETLRN
>Alen_Al4_ctg01_-_Alen_Al4_ctg01g318t1	MVLNMKTVGLLATATAISASVIELPVRIENSYASVEVSVGTPHKSYRLFFDTGSSTVWFTSTGCTTTSCPSLSSYNRTLYSANSSSTSTDLHSFASIPYVDGDAVTGAATLDVFSTPDGSFEWNQTFLAANESSWRWITADGFLGLGFSSIASNATSSLVETLLWDGELDEPRFALFYGTNLNDTGEQNGILTIGGSEEEKYVEGEVVYAPLRKESPYELWRAPLRSVSILVAGQQNATVSMKTGQMPETTDAEGVFPSANVTWDMWGFGGAVFDTGAGRVSIPDEIIDPVYFNLGWNLTKLLNGEERMECQHLNASWAITFTLGEGEDHTKDVSFSIRGDEFIRPGDQCMPPLDNSGGNQFALIGAAFLRRWYTVFDFGADKVEDYQPRIGFGQLKKE…
>Alen_Al4_ctg01_-_Alen_Al4_ctg01g319t1	MASDRDILPAWAKPSHYAISLYDIEFGGDFGYKGTVTINTKITKDDGFSDLVLNAHQLKVHAAELKAGDTTKSAKGISYDEKRQRVTLDFGEKINYSGAVTLEVKFEGTINNIMAGFYRSKYTPKGEVPASVAKDDDFHYMYSTQFEACDARRAFPCFDEPNLKATFDVEIEVPKDQVALSNMPEKETKESKRDGFHTVVFETTPVMSTYLLAWAIGDFEYVEAFTKRKYNGKSIPVRVYTTRGLKKQGEFALDNCHKIVDYFSEVFQVDYPLPKVDLLAVHEFSHGAMENWGLITYRTTAVLFDPETSADSYRNRVAYVVAHELAHQWFGNLVTMDWWNELWLNEGFATWVGWFAIDHLYPDWNVWGQFVTDSVQQAFALDALRTSHPIEVPVYDGLE…
>Alen_Al4_ctg01_-_Alen_Al4_ctg01g320t1	MFCLRSWIPVLFFLLRTNASPVYLVLFISATYFLNRPCVYCSLLLFILVVALFDFHTPWFDQPLSDTAGLALNETTSLLETVGVFAQAATNTAQELAKGAVDGARGKASAGAMNEWVKGLLGKKEWKIQCLDVLIRI
>Alen_Al4_ctg01_-_Alen_Al4_ctg01g321t1	MMNLFRLLGDLSHLFSILILLHKMKTSSSAAGISFKSQFLYLVVYLSRYIDLLWTFYDPNALYNTMFKIVFISTSAYTVYLMLNDFKPTHDPNLDTFKVQYLLAASTVLAVLFPYKYTLTEILWAFSIWLESVAILPQLFMLQRTGEAETITTHYLFALGAYRALYIPNWIYRYFFEVPRFYDPIAVIAGIVQTILYSDFFYIYYTKVVQGKKFNLPV
>Alen_Al4_ctg01_-_Alen_Al4_ctg01g322t1	MTFLLGWKDVLRPIRDGYRHLFPAPDTGPTPEERQRQRAVDQLKGFTYFDTFEQLQMWTEGESDPLQRSNTPLLVRSVSRRDGLGKANILFCHDYAGNYHDYEGVSNTGLDEEEYACGYMQFVETFIYFSHKLVCVPPPTWTNTLHRNGVKALGTILIEPQTLGSEKLLQHGDDGLSFPFARKLAVMAKHYGFDGWLVNIEKPFPTASWDADILKAFLTQLKSDLGTEKQLIWYDALTTSNKVSYQNSLSASNLPFAKACGSILTNYCWKENDAANSLHEALRENLSLQRIYFGIDVWAQNTTKVSHPRITYPEYGGGGTNTGVAVAKLAELGLSAGVFAPAWTFEHFPRHGRDVERTMWEGEELPEAISCSCGDCGKRHRANSAMPLVGFARQYSAGS…
>Alen_Al4_ctg01_-_Alen_Al4_ctg01g323t1	MHPVRGTQAVLAIIVLGLMAYVSSWWTSHWRQTSPAQVSFLIFVPVWSLLTLLPIFIIPLRFSHLLSSAGIRWGLVALDALTMLFWFAGFVALAVFLNGRICFGQVCDVARAGAVFGGLSWAVAAGAFGYGTYLAVTAEKRRVPAVQKPDVAMHQGV
>Alen_Al4_ctg01_-_Alen_Al4_ctg01g324t1	MPKTAVFTTVTPLPAGITRKSVLDMYRDHLAMIDLNPLVIERYKCKPPNYAPTSEYYATWYTIKDKVSYLPGGLATGSVSYHAVFHDLSDCLETHVYAPLGLDIRGKWSVGGSLPGEPKQHTETGHKAPRNGLYIREEVRMTCSKLLLGFVKKTFKDSHSRLVEKLVERAHILESNFANERLKALRNVEPRERMGHGDIFIAPPPDYQFAPPPYRAEASPRFSPHSRSQSASTLLTPGLSQSSSFTERSVSISSAPAQQYRPSSSRSEVRSNAIAASKQSVYLLPATTYDGGLSASFNRPISLYPGSTPHAPSSRLVSLYYETVVDETASDEETDQEPESVSTHIVSPPYIPKARPISFNFAFNQMSPGPKTPISNEDLLADIDAAIDDSYVYSSPDTR…
>Alen_Al4_ctg01_-_Alen_Al4_ctg01g325t1	MDYQAPAPAAGGRGCYNCGDNSHRAAECPTKGTPTCYNCGEKGHVSRECTSPQAEKTCYRCGGTGHISRECTQAGGAPGGGRAGGQECYKCGQQGHIARNCSQGGGASYGGGFGGRGGYGGGAGQGGFGGARQTTCYSCGGFGHMSRDCTQGQKCYNCGEVGHLSRDCPQETSSERVCYRCKQPGHVQSACPN
>Alen_Al4_ctg01_-_Alen_Al4_ctg01g326t1	MAPQRKRDNRENTFFNVGVQGRKTGITLEERARDDNGLEAISGIFSSPDKSPPKRGSTNNASESMDIQDSSIPNITTSAAILRNNRTHLPPPRSRSPMKTALGSSPRRQSSMAPRGSSVAPSSPIRATSHPAVARRLDFDEEEEDVSLQETPALSGSGQRRGKRNDIYTLEQSPSRQHSAVLEESELQEEITANNEEEELPVMTEFEESFVAQIGDDSVTGVNAIESLLEEEIQVEEEIVQEPVKEKVKRGRKRKSDLAAVADEESPKPSKTRKRGAAAAPASEPTKKGKKATAATVVPSRRSKRVSDVSEKEPSIPGEASAMDTSIVADVSEQFEEVPVAPKRRGRPPKVQKNAEDEPAAPAKTSKKAAAKEAAKEKAEPIFKKPLKPVAVPKEKPVP…
>Alen_Al4_ctg01_-_Alen_Al4_ctg01g327t1	MDINLLLEPRGSESPASKKSSASVASNSTVARTYTTAPSAYSTSPAHGASPAYISGSPSYATASPYGPNPVYPAQAPTSAPSVSGAMLGGPVLPAISELQRHPDPSSHPQFRPLYTGPPAPGSVHHGPSGSNRSPPHQVIKRQASQTPLPDESPAKKQSKWTPEEDNLTIELRGQGMKWDDIAKRLPGRSSISCRLRYQNYLEKRAIWDEEKKNKLARLYARFKDQMWQKVATEMGIPWRSAESMHWQLGEQEMSARANAPVFQLHPSATSNSSPSPNAAVPAPVPAPTSHGFTPANAAQLMPNPPSVPAQQYQAAPPLPPQGPVHSFHQRTDSGSSQGRRRNDSFSRRRANTFSRSSVPPQLSHPLPQIHPVSAEDLVSGARTAPAPMVQSDIKREGF…
>Alen_Al4_ctg01_-_Alen_Al4_ctg01g328t1	MISRLKSQSTYKRKCNEKADPVSVPCVGNGGDVPPLRGTTHLEIWFVFASLLAFALLLHTLEPDPQPVSSSGLNAPRIEAAAFAALAATGGVFAMTRACSNGLCREGSESDKRVGGEHFQGCWRSGQGSRPKAQKRDDLARRTRSASILRPPYGKQAPEASGENMLCVSLANADLIMAVEWCCALC
>Alen_Al4_ctg01_-_Alen_Al4_ctg01g329t1	MSLQSVPDVPLLISSPNSSSERRISPSWSIAHLKSRLEPITGVPASSQLLSLRVGSQDAVPLIGLDEEQTRLAQFPLQPYAEIIVVDTRPPAARTNFSDLSAVDKYIMPAEEYETRTDSVLAWKKAQKLGRFDPNTPSIEQQKILASEREIEERGLTVGGRVRLLPESDARRGTVSYTGLVPEIPGIGAWVGVTLDEPTGKNDGSVKGKRYFECATNYGAFVRPERCEAGDFPALDMDDEDLEEL
>Alen_Al4_ctg01_-_Alen_Al4_ctg01g330t1	MKRSREVDNEAEPAAKVRRVADVDRLSRLSDELLVRILSFLPVSSLLVSQRISKKLGHLAVDSELWKAAYYRTFVLPRASRIPGIKNPGAHDRLHYSSRLSQWLDDGALVKQGVKTKWKQQYRLRHNWSRGQCAVSEIVVSERPPEPPLLVMLSNSTIFAADSISGLRAWNLKDGRELLASTPFDVAATDALQLPVSMAVDSLDGQDKYERVVLGFEDGSFSVFALHRNQKRFDTLFTHPASSNGMLSALAMSSPYLLTMTEDHLVSLYAFAEAQVGSSRLEPPKLLYSLRSHTAWPPVSLSLRTTATSMTAAIAYSLPTYLSGWTVGVQELNLSHKGELLGSRLATAANEHCFTLSACRSTSSPNTRPSSPFAVASHDSSSTSGPNNSKPTSMSYSHP…
>Alen_Al4_ctg01_-_Alen_Al4_ctg01g331t1	MADFASWVDNNRGLWTRVYDEVIAPDLEKEWKKREEEQKSELKQKDENQQLLFNHINEQIVKNAHLVEENERLETELQQRAESTAPSTTFEDATTTSAGVSECEHRKLAEKYDELSKKYQHLSQKVKYLERKNNAVMQKNRDMKDSVRAWQQYADRQKPNQTLKGAPRLDEGPSKLLNIFHNDEAPPHMPSSPRSVSTVRTPLLRADRGHSSPAPGVLLTDPEAVYEATVYQDEEHLPSASVTPKGPIAANRSEPQSVARGDSLLNVKSDRGGRLRAENSGAPSSSQTTVDEGADQANRHIQAVDIEDEDDRPQIVSERSLKRKRGQQPRIDIYTGRSSDGTPAKPYRVKDEPLSSPPPAVHVLMRTETIDLDDPAPSDLEPTRPPQKSPLMYPNSTGT…
>Alen_Al4_ctg01_-_Alen_Al4_ctg01g332t1	MTAIAPPRPSPFASQAFDAAVAGTESLVEDWLKARKVLEIPESTMANSKKWYHGCIGGVPLPTLVKRLWTASGEGLRANRYRLPRWVYLTVFTMMWAAAVGQIAVAIPEALEASRDQWKNNQSKAYEGPVCGQLPVDRAYRILVRGAISGLPMLVTLTIFLFPALYKA
>Alen_Al4_ctg01_-_Alen_Al4_ctg01g333t1	MADIAGYHTDAKLGQDLHSNKRKRDTRDQGMNRPAPNMANADLTDQDAAFHLAAHNAGTNDDMQQFDMHPNGGGNTSSVGDTAAAALAYHQMTVPQATELQFQTQATGGDGSFNMGDHQQQTSMQDFSLEALKAATQTGRPGQAANSDSPPQSASHKPPVGSDEWHKVRRDNHKEVERRRRETINEGINELAKIVPGCEKNKGSILQRAVQFITQLKENEQQNIEKWTLEKLLTEQAITELSASCDKFKGECQRAWDEAQMYKRACENAGIIPEEMKEREKHGEATGPS
>Alen_Al4_ctg01_-_Alen_Al4_ctg01g334t1	MVNHHQLAEAPIVPPGVDEGDLLDIDNSEPVEPEPLEPEPEPEPEPLELIEPLEPTEPVIEAEPVIEAEPVIEAEPVIEAALSSLPALPLLPALPSLPSLPSLPTLPSLPSLPSLAHRPGLHLVHSGGLPRVEPTPYAFTYDDASTLHDELDEWFTYAVEEQAMLLNTHASFAQAWPAFLAHTESTYRDGRLDWLHAPPAQHHAFVAHLLHAIRHDEPPARLNSLEALLYLVLGCWHETAGLPCTPPAPAADRESAEHPEHPEHPEHPEHPEHPEHPEHPEHPEHPSEHPSTPSTPSTPSTPRSHPAPPPTHPPSSSTSSAATSTCWLPPMASKPWSTSCARQRREVWCAMTAVYVFLELARHQERKHNDLTLRAAVLHLHQPGLLMLLVELISKLRWD…
>Alen_Al4_ctg01_-_Alen_Al4_ctg01g335t1	MTVTRELEAELEARPDVDETTHLLPLLKPEDARAGSRGVSIQWRLMLCAFLVSLSFGITQVPMLYVFRLMTCDAYYEDERHVRDPTARDACARHEIEASTARSIALLGGSTTLFGLINLLITGWTIKRLGVKRALVIQIFWPAVRLAVQNIGVSKGSSAGIIILQASQIITVVGGPNGYVLALNSFVADVVEHEGRTSALGRLQGCMYFGAAVGFLIGGLIGEAFGIAAPFRITLVLFLLSCLYIASCLPSTPPHEEKDGHLSQPVTGIGRFLGPLRIFAPQKWTLIDGRQSTQFGALTLGLGVFLGILATGYIPTLLQMYATDVLEFGTRANGWLIFMYSSLRGFFLSFIFPRIISVGRNWLEPSKAKALANEPLSSDSRVPTSPNEIGPVDTMDADV…
>Alen_Al4_ctg01_-_Alen_Al4_ctg01g336t1	MRFYQVFAWATLSLLPAQATARTLRSKPSNLIVAERAPLQDIVTWDEHSLFVHGERIVFWGGEVHPFRLPVPSLWLDIFQKIKALGYNGVSIYMPWVLHEPKPGSFQAEGVFDYEPFFDAAKKAGVYIVARPGPYINAEVTGGALPGWLQRISGNLRTPDADYQQASKNYIEHITPIIAKAQITNGGPVILFQPENEYSAGLNNVTFPDAEYMNHLMKQFRDLGIVVPFINNQAWAGGLNAPGTDAPVDIYGHDAYPLGMNCTVPGYWIDDALPTNWRETHLEQSPNTPYMLVEYQGGAYQPWGGDGFEKCAEFTNHEFERVFYKNNIAAGATIFNVYMTFGGTNWGNLGHAGGYTSYDYGAAITEERQVHREKYSEAKLIANFVHASPALASAVPGYN…
>Alen_Al4_ctg01_-_Alen_Al4_ctg01g337t1	MPKVFNSIQDHIRHRPLAVYSVAISLIIFLSGITLYIADVFFSRYQQPGDRGATLFSLLGPLVKHLQTSVGTLPDHAARISLHIGEKTREIRPLFIALADRLATEVRHLLGHPWIARIPIYQLLTVIVLAASPLLIRRKSGSWVARQQAATANTLHFVAFASFVGQGLRSGDWLVAALVMVSFDVFQRALDGDATGNNESQRYSNAPSPAVETLLEQTHTLLTESQIVHLPKRSLFGSQKGVPTSIIGSRDLKDREIVRLQWSLTDLQTANKAKDLELHVARQELLNAKDALTKSFADISALRDEMKTIKQTLGKDHQAIVYRKDIELFALRKGNEQKERHMQEKDAQLNETFRQQHATLELKEAQLNVLKERLALMERQASPRFGHDAKFEESNNGDH…
>Alen_Al4_ctg01_-_Alen_Al4_ctg01g338t1	MARYNPFSFTPGPVVFFTTATYIALFAVLLVTHLRVPAYPSNTPQGTNLTQAWNDLQQITRHFHPYNSRANDHVRDYLLARVKHVVASQHLTSHDIEIIDDNVSNATFSTSNTTVYFEGTNIIVAIRGSEDDEPFYAPNQSALTTARRSNNGGVLVNAHYDSVSSGYGATDDGVGVVCVLQLLSYFTQEKNWPKRTVVLLLNNGEEDFLNGAKAFMRHPISQVPHTFLNLEGAGAGGRATLFRSTDTEVTKYYGASKHPFGTVVSGDGFKKRLIRSETDYKVFYGELGLRGLDVAFMEPRARYHTVEDSTRETSLKSVWHMLSASIATVSGLASDTSDKFTGSEEAREDGKVDAGTGTDAVWFDLLGQVFIVFRLHTFFALCVTLLVVAPLTLIGLTVG…
>Alen_Al4_ctg01_-_Alen_Al4_ctg01g339t1	MHSRSDSQRGVESLLPSRGVPALPPLTDRPTLYSGCCLALSRPLVAHVHSLLPPASALTLSIGSGFGLLEAYLAAAPYNANVVGVEVEPSPNTHLPATRHCVVHGTRFLEPLAAEASAWLFVYPRRVGLVDEYLAAHGRESESVHVIVWIGPQADWHDYQRCFTPDWKVHTQSADAVGGKPWELIATAKRASTCARGASSDAS
>Alen_Al4_ctg01_-_Alen_Al4_ctg01g340t1	MYISNIFVAALAATSTAQAFNIKEEAHNASQVSKRTIGNIFGALSGLLGINKASQSCPAVWSQISTQLTAQFLADGQCTDAARAAIRSSFHDCFNGACDGSLILADECSNIENRGLERLCGNLKTVQANTGVGMADLIQFAAAHGVKTCPGGPTIPVKVGRKDSSTANAMGVLPSGFANGGDLIKLFASKGFSPIDLAALLGAHTAAKQRFTAPDKPQELDSSVGTWDNKYFSETKSGKAPFTLPSDKSVAQNPLTTLPFTTFALSKGAWDAAFVSAMQKMSMLGVDSKGLIDCTSALPGGSRKRDVKNSNVFDRFKF
>Alen_Al4_ctg01_-_Alen_Al4_ctg01g341t1	MTDVWRGDILLPDGKSVRDVGFSSQHLASTPSIPGIPGASLRFLATVDTAKIPLYLAAGPSYDVWTLSDVSEAWFESLLLSQPAPSTVATSHASAHAWWTRARAQSPIGLLVQVESQGGAAQKPRVTELLLYGTIAATPAVQGLLTPPSLQEVFNAQLGLLPELRVHALPLSSDLLQPHTAASIPPPPSPTLSAADPPDDIEAHFLPALPNTQAAPTSPKRKRDLFEEATLARRKAKGKGGEGVAAAAARATESQRPHAHRKSISFEAKIPPLPDSRPPSAQSVLPRPLSRQLSRSPSITSDIRPLSRKGKEAADTQGRRSNLSRVDTISLHPEESTTESRNKEALTKVVMAAMRMHGLQQRRKTKSRRASMVPGLEETQSLADEITAEDVEKDEEFKL…
>Alen_Al4_ctg01_-_Alen_Al4_ctg01g342t1	MHSYYYYYYYYYYYYYYYYYYYYYYYYYYYYYYYYYYYYYYYYYYYYYYYYYYYYYYYYYYYYYYYYYYYCYYYYYLYFYFCLSTH
>Alen_Al4_ctg01_-_Alen_Al4_ctg01g343t1	MLLPLLCYYYYYYYYYYYYYYYYYYYYYYYYYYYYYYYYYYYYYYYYYYYYYYYYYYYYYYYYYYYYYYYYYYYYYYYYYYYYCCLYLCFLL
>Alen_Al4_ctg01_-_Alen_Al4_ctg01g344t1	MNHNMTGGDRVGEGKPKRARVRSGCTRCRTKRRKCDEVKPVCGRCKEKKEACQWTTRIVFREENNHGLSTPQPFSKHSKSKRSAPGRFEIQDVTAEIIREHQHHGPVEILVPTTDSALKEHDRSSQMADEAATHFHDMQAWEVAATMKLMDAGAPDFTKFDANYQESLVMGNTETANTLPTVDELSYVWPSPTALGLYDDSIFLPGSAYLDAHSTLRSHLINEVNTSSATRIGTPELPLDEGVETSEFDDESTDRHPSPQAPLTDEEEFSLLQNWIEELSPWLDKFDGQRHFQHTLPIMARSHAHLRYAILATSARQLERKERSSHTERSLALYQKAIQLVLPELHTRSTPVIASCVVLCGLEMQSSSPKAWRQHLDGCAYLIQASGIHGFSGGINQAL…
>Alen_Al4_ctg01_-_Alen_Al4_ctg01g345t1	MAPGAVETQNTAFAAPSSSTQIPALFSLRNKTIAITGGGRGLGLTLAFAVVEAGGHAALLDLLPEPSEPEYSALTKLAKASSLTVSYRTCDVTSEADVTSVLESIEEEGEKSGAPLGGMVACAGIQQRVPALDYEASDFERILRVNVVGAFISVKRTAKILREKGRGGSIVLIASMSGSIANRGLTCTAYNTSKSAVHQMCRSLAQEWGQYGIRVNTLSPGYIRTAMTDELLAADPGLEQTWMRGALLGKLGVPDDFKAPAVFLLAQGSGFMTGADLRVDGGHCASA
>Alen_Al4_ctg01_-_Alen_Al4_ctg01g346t1	MTHLVGRPLNWAITATAGSGFLLFGYDQGVMSGLLTGYAFTRTFPEIDTTTGAGGSSSLQGTVVAIYEIGCFFGAILCLIFGEKLGRRKCIMLGCVVLAIGAALQSAAFGIPQMIVGRIVAGLGNGMNTSTIPVWHSELMKANDRGRGLCIELAINIFGVMTAYWVDYGMSYVSHDAQFRFPLALQILFAIVTFVGICLLPESPRWLIAHDRVEEAKHILWAVEKNATELDPDDEVLRRDLAEIQHAIAEERAAAAGSSYRALLKNGNQRFFYRTMLGIGGQFMQQLSGINLITYYAPVIFQQSVGISRDLSLLLAGFNGIAYFLSSLIPIWLIERLGRRKLMLFAAGGQCACMAILAGTVANGSKSAGIVAIVMLFLFNFFFAVGLLAIPWLLPAEYA…
>Alen_Al4_ctg01_-_Alen_Al4_ctg01g347t1	MPRLPVHREPKEDRNSHTNAHTNSSGGRRQPQLSTLQKHFVAASGEFCGTFMFLYFSFACQIMLHTQRSDSSLENGGFSATMNIHTALVYGFSLLVNVWAFYRISGGLFNPAVTFGMVLAGTLPPVRGLILFPAQLLAGMCAAGLVQCMFPGDISLTNTTLSPGTSIAQGVFIEMFMTAELVFVVLMLAAEKSKDTFIAPVGIGLSLFVAMMGGVYFTGGSLNPTRSFGPAVAGTHFPGYHWIYWVGPLLGAALAAGYYRFVKYFNYEEANPGQDSDGED
>Alen_Al4_ctg01_-_Alen_Al4_ctg01g348t1	MENPPLASLSLTHVHYNPADRLSYLCAWLALVPQGLCVVYATLIWSNREIEIGLMFAGQLACEALNWVLKRHFKEERPRAPSTQHPAPSTQHPAPSTHYPEHITQHIAPITQHPAPSTHHTPHSSQLTQDGMLTNSEMHGKGYGMPSSHAQFVAFFSVTLTLFLLFRHVPHPTETHTPFSFAGRFVLSLLAMASAAAVAVSRIYLSYHTQKQVLVGCACGALFAMVWFVFTTYLRRAGWIEWALSTWLARAFRVRDLVIQEDLVDSGWARWEERRKRQDFRVQDKKIR
>Alen_Al4_ctg01_-_Alen_Al4_ctg01g349t1	MDSESDERTEELDTLQSIYPELVHDAANPYTAALDLLVAPTKPLPVTFAPGHDIQRLAYLPTLHVDIHLPAEYPNHGPPHIRITTTPPWLPEPSAQKLADEVKSIWDEYGGGMVLFAYITSLQEQAETCFGLDDLTLPASMRKELLAYSRRMKRELFDKETFDCQVCLEPKKGSACYRMERCSHVFCVACLQDYYNNCITEGAVNNVKCMSTECGKLAPGTRRKERLLSPKELLQIPLPREQVERYVNIKRKKKMESDPNIMFCPRTWCQGAMRSDKYPKIKDISTMDSSDSEAEDEDRQAQPVAPTGPEKRAVGIRGMDRLAVCEDCTLAFCVVCLSSWHGDFVRCEPRDANQLTEEDQASLNFIMKNTSPCAYCSVPCQKSFGCNHMTCAQCKTHFC…
>Alen_Al4_ctg01_-_Alen_Al4_ctg01g350t1	MSQPMNFSIPEDLKLYLADLDAFIETTILPLQHKDDNNRFFDHRREHSRTDWDAGGLPRKEWEDLLSESRRLADEAGFYRLSLPKKYGGQNSEDGRGSNLWMAVIREHLAAKGLGLFNDLQNEHSMVGNFPDVIMLMNFGGEQQKKELIPARLRGAFRMTFGLTEPGHGSDATHMATKGRPEKRNGVDGWLLNGHKKWQTGMHHATHCSIFARTAGKDGEVKGISCFIVPRDTPGLKAESYEWTLNMPTDHATVSITDVWIPESAALGPIHNGLGVAQAFVHENRIRQAASSLGAAVYCVQQSVKYANERAPFGKPLSQNQGIQFPLVELATQCEMLRQLIRKTALEMDSMPHNEIEKRIGDKVSMCNYWANRLCTQAADRAIQVHGGNGYSRHYPFEH…
>Alen_Al4_ctg01_-_Alen_Al4_ctg01g351t1	MQPRTPTHVQSKLFAYTAAVCLLLSTCPSAPAPFFANAVDIPAAPGQQHSVQAEVLLPAVADPAQLDHGITREEQSRGYVPDFAYFARSLLGRQGEEVGQLKNDEKMDIDIKPETTVYFVLEKSQLQARGRSGWLVNALDATSSEDSSMSKHIEDDDDNISAPLPPGIPGETLQARQTAGRKLWVSANTCKQPLPGNNASSTGAPQLTLYVSTSAQNQKPGPSSTEHLVTNKTGIPFDNGYVSLEVNATSDVYIGISAPKLNENWFGSWHFEIAASTDGSYHSYNKTNPFLFMVDTDSESTLFITYNLTDSNKPEDIAKWNKSNPFAMYAFPAGRSPVTGMENSYCALKQQFNSTNNITVDTQITTKFGAGYPKSQFNVHNLTNSQTYNGYLVVEGNQD…
>Alen_Al4_ctg01_-_Alen_Al4_ctg01g352t1	MMLSTIVHIAAFAAGLAQALPQPTTVPNVATPVRAETTAAPQPRQAAVNPFAGYNFYANPYYSSEVHSLAIPSLPASLRPAASAVAKVGSFVWLDTRAKVPTLDTYLADIKQRNAAGAKLMATFVVYNLPDRDCAALASNGELLIDQDGATKYKIEYIDKIAAIIQKYPDVKVNLAIEPDSLANMVTNMGVQKCSRAAPYYRDLTAYALRKLNLANVDMYLDGGHAGWLGWDANIGPAAKLFAEVYKAAGSPRAVRGIVTNVSNYNAFRIGTCPAITSPNANCDEERFIKAFAPLLQAQGFPARFIVDVGRSGKQPTGQQAWGDWCNVQGAGFGPRPTTNTGNSLVDAFVWVKPGGESDGTSSTSAVRYDAACGRASAFKPAPEAGQWFNTYFEMLLKN…
>Alen_Al4_ctg01_-_Alen_Al4_ctg01g353t1	MFTMSPLSSEITKSIEDAVAKNFNNEVAFIQKMVQYGGQRGEEHEALEELYRQYASRGYHTTKLDMDQQVLSQHAGSGKFSDTHSKAPVIVGVHEPKSSMPGGRSLILNGHIDIVPNGPKELWTHDPYSGTIEGDWLYGRGSGDMRAGAVANLYALDALRSIGKQPASKVIIESVPEEESTGNGTMATHLAGYTADAVLIPEPTNEELVRANVGVIWFKIAVAGRPVHVLKAKEGSNAIESIWKIVAGLKELEKEMNDQKKGRLYFEHMASPINLNVAIIQGGDWASSVPAWCTIDCRVALFPGVTAQEVADKIERKVAEVSTTDSFLRDSPAKISWNGFFAEGYVLEPGSEAEELLKTVHQKVVGAELTSMTMPAYLDTRIFALEQKIPALCYGPIGE…
>Alen_Al4_ctg01_-_Alen_Al4_ctg01g354t1	MRFSHFSIFALGSLSIASPILSKRADAVSLFNDLFATVQTYTGAINATLAPLSASSPLLEKTAATIQVGAQINLITAAVTATTNEIKALPQSNSTSTKRSVGVDLDIDTEVTSGESQPKEKRQLVAVGALLALIIVEIFATVTAAVAILGLSGLLVFLNPLTAALSLLILAVELVLDVVLVGVIALLDSLLTALALGVSGL
>Alen_Al4_ctg01_-_Alen_Al4_ctg01g355t1	MLRLARLSPPLTSGNPLFARSTLPAANAARHLHTSTRLSQIMAHLHHSQPKGELTLQSLPKSNVFTQNLPPDAAFPRPQDSHDAPRQTLGPRMVKEALYTYVRPDPQGESEVLAVSQRALQDLGLKEDEAQTEAFKQLVSGSQILTWDAEKPDEGIYPWAQCYGGYQFGQWAGQLGDGRAMSLFEATNPSTNTRYEIQLKGAGRTPYSRFADGRAVLRSSIREFVVSEYLNAIGIPSTRALALTLNNGTKIMRERVEPGAIVTRFAQSWIRFGTFDLQRMRGDRETLRTLADYTAEHVYNGWDKLPSKLPAGEAKTTHTEAKTGVAKDTTEGSGLEEENRYTRLYRAVIRNNAATVAKWQAYGFMNGVLNTDNTSILGLSIDFGPFAFLDTFDPTYTPN…
>Alen_Al4_ctg01_-_Alen_Al4_ctg01g356t1	MNGQHIPGFYYDQEKKKYFKIQSQSAARGLDLKYSTSNLIKERRKENVQKAATARTTRIQKERVVRRHASNLTQSDLEREIGYKRRSFYLQNLWPEACMSGVRATSKPVTSTANNEVIRFFDRDPVSKTIYAACGENKVKRRQHLGDDQAGNLHNSQSRDKLRALDTKSRYGYYPWDDISRTTSTVSSFQYMPSSGALAVTTIGSDRPPIIQLSDPERDGPHISQVFTPKACSAIWTSAARPPSFSLSLDLSSTIAANETEHLAVAAQQSLLLFTRSPSGSWDSQTVLPDLHADILALEWLNHTTLALGCRNGKIHLYDTRSGGTSHILTHPYPTSKIKRADDATRIVCSGLQDTLFLYDIRSPRLSTHRERSGKLNTKHHHYNETYFKTLYPGGHDYK…
>Alen_Al4_ctg01_-_Alen_Al4_ctg01g357t1	MLPDEIIAQLTGEFACRDQPIQHLTALYSAHLPSPPFVNVHGLTATGKSSILRTYFHLAHVPHAIINVRECITTRHLLERIVAASLDALQEAHDEEIDRRPYARTENLSALCVNLQKMLEGRGKFVLVLDAIDKLREGGGTLIAALGRLGEAIPNLALLLTTTLPLAPSVRHSSSIPYIAFPPYTRPQILTILGKSPPKVFVTPPSADKFPDYTPDLAAEDDAWLWNRFLGAVYDSLGKHTGRDLISFRATALRLWRDFVTPIVKGEFGTRDFSRLMVNRRHLFQGEEAVLDRIIAPQPQTTTGANKVILTRKAVPGIVQNLPFYTTHLLIAAYLASYNPARTDVTYFMKHTDKRKNKRRAPGPASLSTTSKGGVKHRRIPRHLLTPSPFSLDRLFAIF…
>Alen_Al4_ctg01_-_Alen_Al4_ctg01g358t1	MSALAPPPPTGRLVPLRTKDEVRASLETHVVYVVEVPAKHANVVKDVVQAAIPDFKTAEISHLRRVVQFKYLPAHLQKQFYPPARLPRGDEDDPAPALLSPSPASLPSASSPPSPPSMSTPKVDGGSAPAAEDVAKDMDLVRYFLLCPTRHIQHADLFALLRKCPPFDNGRTPPHILYVTVPSLAPISAEQSEQWSEQYWPIAYKNTNPYGPHPSLVSRNQAEIEDKVGDWLALARSAGQCISEQCLGESLGVVVVDQTKSTPEVIVVAGDCRWRSPTGTIEQHEGTGNVMAHAVHRAIAMVAKKRLRAAGTDPALLDRSLFCDTPLTQVEKEYYVKDNINQSGYLCVDLDIYLTNEPCVMCSMAILHSRFRRCIFAKRMPLTGGMTSDTAEGSAPLQG…
>Alen_Al4_ctg01_-_Alen_Al4_ctg01g359t1	MGSLAATLSLSSNLPIGWDYHGCWTDYGRRKLAGPSNYAYAGIEYGQECWCGHLLGAGSEVRNDTECDSRCPGAADEACGAGYRLNVFFCGLLSTQVINPGPPGTEYLGCLTDSVEARALSLFQTSEDDMTVFACTSSCKALGYTLAGLEYSRQCFCGDSIDNNATMTDEGCDMTCVGNSSEFCGGADRLNLYELEAGTTIPAPKASETSPLVPNCNPIAIPTTDAYALNGGFEQGLDNWSAVAYDPNLVPFDIGLTNDALEGCTALTAVPRSGITAQSAHFQTSTSFINMQPSRDYMVDLAIGHRAIVHQQTAMSDPKYTIRMSNRLLGRGTVCGFSSFPCPLTGLNNSTYMVLSMQFQADSPTEDLTVYLSWYNGNLDISLYLDSVSVGLAPDDAFV…
>Alen_Al4_ctg01_-_Alen_Al4_ctg01g360t1	MKLFTYEAWGFPSTGFFDPSKTFVTSHIVSPFVLACIRAVLCVYSFTTIIVSYSWFASNTATIALKDVNIGSYKIQQSEDAIGQSFSFFTFLTFWSLGFYFLVSSMHTFMFAHKDCTWLHRWPNVLQLMHSLYYSCVTSMPFLVTIVFWGTMNSGWPAGRFEQWMNLSVHGLNSVFAAVEIVLSATDAPPFSHLSVVLLVLSAYLGLAYLTRHTQGFYVYEWMNPAHGNVSIVLHVLGYAAGMVTIFLLVSGVIRLRNLLAARLGQGKDIVTQEKGMKLDDASDTWSSDISMIRPQSSRRKDESVV
>Alen_Al4_ctg01_-_Alen_Al4_ctg01g361t1	MPVPPQYVPAPVPDRTQQTASWQSFEPAFASSRSVSAPMSRTPHRDAFQPPHASLTPHMNAINAELEMLGLDEDHTPEDEELPDYAQSQAEMNARKREEAAARARDLEARWRGARGRRN
>Alen_Al4_ctg01_-_Alen_Al4_ctg01g362t1	MAEQDQSQRMKRTEIAPSASINSLIDAANSNDRFKLLEDDAVLPANLTNPVHPIFHQLEGEAQLHLALQLASHFLLHDRLLEFFVPLVFGSESFDLQCRKVYLCDPLLKASKAKQAQLLSDVRKALDCLAQRIEFGFVNHKKERLYARTIANDVKSMPTSSCCRAFQGEVSPKIELTNKFLQYYNSADGYVAASRCARYRHDFLFATTLVHEVVHAVGVMRRGNVDEPHYRPDFPETEWGYAWENFMFGSIINPQDKTRPGTHLLMRKVWADPKLADANGGKEYSDVPVSWIAQWFRNKTWDIVAKQGPTAITPPTAHFKIQISHELGAWVVSSECPDVRKSIADLYKRWQMYDRRVKCEELALDGSRASNKIYHSTVTAAELQGSNVPIPQRVRDRSG…
>Alen_Al4_ctg01_-_Alen_Al4_ctg01g363t1	MDWDDFEERASRVKPVQPLKPKRYWVGVFHHGNDPQQPFNELDFVWMIGHSKITLEKIAQTYETRQDLTDIHLVYRDGDVDKSKTLKDVMNVGSNLIIFRAVRAGESFPTFGTPAPALPATSRTPNVPFTAAEATASAHSLSNRIKNEPQDGPGLHTHMSYAVPGKATSRVPTTAPTHSPLGTPTQHPSDAEDQLATKKLSQSQHYGSSAMNHTQNTLRSPLDQAQPAAPLTAAQQTFKSPTHHTINTPQIKPDSGLDGSSVLGYPGQFVRFRPQHTSYASPYGVSPLAEPVSAAARPPSPMREPYVPPVFRNKVDEPSQPFDPNNFFNRELSPQGDFQEEITSTDRSIRDIITREDPVVLEAGVAEALNVLEEFKQVFVRHATSSPDAQVWAESIDKL…
>Alen_Al4_ctg01_-_Alen_Al4_ctg01g364t1	MKLTTILTTLLAAVGTATPTSSSAPELTSLFNADDAIKLYVQNTTLNALKQDMLKNKDTCAAVAATDSIDNSDKNSTVTTKADTTKADPPKTLEEILHYIWCQQCRDEFDKFMVMLDSTRGLFADLPVRCLAVEERLR
>Alen_Al4_ctg01_-_Alen_Al4_ctg01g365t1	MADSVDRVFSHALNTVNKIRTGSQKPPSATRLRLYGLYKQAMEGDVDGIMDRPEGNTEQEQRAREKWDAWKQQNNLSRTEAKRRYITTLIDTMHQYASPSPDSRELVAELEFVWDQVKSNVPSSSSSSPLQTLDQVGTGMSASYSALERQRASKEPDEYSNQEDEDQPLQIKSPMSQSEEDLEAQEADMEREEFVDAPDSQYALQLYRTGAMDHNLSEADAQPPSKRPAQSRTLSRREPQHLATPTPQPRMRSIIPQPIPLPTFTTPTAAPSKADTPSAADLKWRKRVESSLMKMTAEVAALREQLEARRLFQHRVHYRFFRAIWRFVWASVKHIAVDLLVLALVLGWMRRRGDRRMEGAVRVLLGDAVAQVQGLRGGALGNLPKVPALPIPKLPGLGK…
>Alen_Al4_ctg01_-_Alen_Al4_ctg01g366t1	MKSALASLLFLLESTLPLAAAASDKPLKPCTVVSPTTERFFDLNGLRRTLPEEGKKKKEGDEGSWHAKGYDYGANFTVNFCGPVVEELSDVQDLDKKLWRNVSAFYERGDRQYAIGLENSEPIFRGKKLILNYTGGSLCPSTSSKRSPVQLPREIIGGDDDDDKKHKGDGDGDGDKKKKPSSDKSERRKTTIISLLCESDPLGKSSISFVAAVDDCTYFFEGRSRFACGSVHAETQTLSPSGVFGVIALIAVLVYFVGGCVYQRTVMHQRGWRQLPNYAMWAGIWRFFSDMFIILTSSCARFMPSRRGYSRVSLGADSRGRGRRDESENRLIDNLDEEWDD
>Alen_Al4_ctg01_-_Alen_Al4_ctg01g367t1	MAPKSKVDQALAEKPHGYEFLGPPGAFVISFGLPVLVYVFTFLCNDISGCPAPILLSPSNFTFDQLKKEVGWTGVDSLLNTNAVLGTLAYYLLSLTFHTFLPATEVKGTELRSGGKLDYRFNAFSSAIVTMAGLAAGTVMYGADWAVWTFITDNYVGILTTNILISYFLATYVYVRSFGVKHPKDPGMRELAAGGHSGNVLYDWFIGRELNPRVVLPIFGEVDIKAWCELRPGMLGWIIMDLAFIMKQYRNHGRVTDSIILVTAAQAIYTFDALYMEPAILTTIDLIADGFGMMLSFGDLVWVPFTYSLQARYLSVYPVDLGLQGIIAVLAVQGIGYYIFRAVNNEKNRFRTNPDDPRVKHLKYIETAAGSRLLVSGWWGTARHINYLGDWFMSWSYVL…
>Alen_Al4_ctg01_-_Alen_Al4_ctg01g368t1	MASAKSVAPAPITEVPIPLTDKPSVDVKVDDIAQTQPLPFDPAALKEKYLAERDRRLARDEGVEQYTLLDGKLSRYLKDPWVEPGFTRAPIEEETDVVIVGGGYGAQVVAVRLIEVGVKNFRIIEKAGDFGGTWYWNRYPGAQCDIESYIYMPLLEEVRYMPTEKYAKAKELLKHSRMIGEKFDLYSKALFQTEVGEMRWNEEEAKWTTHTSRGDVIKSRFVIPAAGSLHRPKLPGLKGIDDFKGRAFHSSRWDFDYTGGNPSGNLHKLKDKRVGIIGTGTTAIQIVPHLGEWAKQVYVFQRTPSSIDIRGNRSTDEEWAKSLKPGWQKHRMDNFDSLINGNDKPEDLVGDRWTDIFRSLMTAKGDRSNPIEFAAKIQLADFEKMESIRARTDEVVKDK…
>Alen_Al4_ctg01_-_Alen_Al4_ctg01g369t1	MTCATTLLPTLTQAGASIALRAAELYASEIGVPMSISIVDAHAQLLGFTRMDGAKLSSIESCIAMAATSASNRLPTSALSEHTPTALTSLLNHPSHRLCALPGGVPILSPTGALLGAIGCSKGTSLQDEAAAVVGRDAVLALIRCEADDEERRIEEEREKVLRLWKEKEGEVESLRDELEMERLAGCGGAKRRKTSSVGLGGAPDTPPEEGEIGEFLKPSFVGEVRAGGF
>Alen_Al4_ctg01_-_Alen_Al4_ctg01g370t1	MSTYEDPTIAELEAQMNSIHAEIDTKLSNCSKIIAKLDTRHNDDNQHHKKADVLLAAHKVAIIAPHIVLAAEKLPEFELKLKVAEYELKRKTDECTRLTAKHLDACKSEIRTKKEKKQLTKTVESLTAQLEGKVTPEERNTKTENEELKQELAKLRAQLENKIEECEMKDQVIVDLTEDFAAYQSVTSNTWAHRHDSCNELNDALEEQCAMLTAERDTLQRNLQGDLNAVQGNYEILSVKHDVLAMKRDELIEERDNLQNKFNVRRVPFLRHVDISLHCQDALKAHQKELDRYSASQCEGSSSCTACPMHLKRALRISKAAEAQALQLVDQVNHDRMVAWNQLHEHQTRVVQEHYAAVESWVSARQAPSVSPTLVSPTFRSGEDGEQGWKITATCGSSE…
>Alen_Al4_ctg01_-_Alen_Al4_ctg01g371t1	MLAMLPSSTDVCAPAVVPDTLASRPKLPRLRTLKTFNLPPQRVDEVLLSASALLPTPTSETLGGHPLRILIAPSGFKESLGPEHVADAIEAGCRKVLDERSVIMHKLPLHDGGEGFARALAAAHGGTVASQTVTGPIGIPVQSHLGFIHDSKTAVLDMAAAAGLRLVPKESRDPTMTTTYGVGELVQKALDAGCTKIIIGCGDSGTSDGGAGMLQALGVRLLDADGQELPKADGGRALSRLDRICWCGIHPRLRKDAAERVEIEAVCNIKNVLCGPKGVARVYGPQKGATPEQVDLLEAALDRLAQVAQNTLKKDISNAPGSGASGGLGAGLMMLGARLRARSDAINEYFEFDRVFEKQWDFVITAEGSLDSQSTQGKMTTEIARRAKRRGAQVVALAG…
>Alen_Al4_ctg01_-_Alen_Al4_ctg01g372t1	MRLPERYYRRSSHDDDDCSQDSRELPRFSFERSNRPLVSTERLFHQWSEDVETAYNPGINAIERMLKMEQDIIVTWDGPNDPANPLNWSQSRKWVVTMLVSMFTFISPFSSTMVTPALPVIADDFDIPEGFMRQLVMTIFLLGYAQGPFVLAPLSEIYGRVTVLQYANLIYLAFNTACGFAQTKEQMLAFRFLSGIGGAAPQAMQLLTVLQLCNGVLADTWRKEERGKGQVIYGMLTWISPCVAPICGAYISQGVSWRWIFWATSIFTVLVQVTALFFLRETFAPAILAKKAKLMRKSLKGIHEDVVVRTEYETGDRFSKILRKRLILPFIMMFTHPATQAPSIYRAYLYGVMYLMLSTFPFVFEEVYDMDVGPASLNYLSMCLGFMIGLQISHPLTDG…
>Alen_Al4_ctg01_-_Alen_Al4_ctg01g373t1	MSYLSSQPKILIAGAGIGGLTAALSLHGAGFTDIQIFEASSTLTTLGVGINVQPSAVLILRNLGLLEALEKTGIQTAELNFYNRHGDSILSEKRGKHAGYAVPQFSIHRGEFQMLLLSAVKERLGEQAVHLNHALTGFEQTEKSITAQFSQRRDGAPAELSGITGHILIAADGINSTARRILYPNEGPPRFSGRMLWRGCLERAPYLTGASMVWAGHADQKFIAYPISQRSTDKGKSLVNWIAELRIRGKDDKDLTPPKTDWTKAVDKSVFERPFESWKCGGLEMKDLIDRTDKVF
>Alen_Al4_ctg01_-_Alen_Al4_ctg01g374t1	MPGLESVRRRLSSIAKPSSEPSSTPPSHTELDTRLLDPNFFHIEDDDRHWFARVNIAVRTAMTKLHTISHDYMHVQRVAVSAFSLYLDEKHQPWTREIDPRTIVVAAMVHEIGAIRYALDHAENEKDFGPRSPDSPDKVQTIQHDLVFEFLRRLDCPPDVAGPAALMASLVSFTREMQDKEKIFEHCEAYPALKFVLDADRLDGLGFVGIARLGAFGSVHAGRSSDTILSMVHLIDKRCVHYVGLMKTKGGKKEAEKRWAQMLEFRDGLVSQTNCSAGLRSD
>Alen_Al4_ctg01_-_Alen_Al4_ctg01g375t1	MMAMPFLPRINALLRPRSTHHTVHHALHSSAILCSKTLPPRRIIPESEIIENFLKGSGPGGQKINKTSSAVQLKHIPTGIVVKYQDTRSRALNRKTARRLLQDRLEELELGDDARTRVKAREKSKKKASSDKKKRRKYRALEAGKEGEDGAEGDELDGDVEVVKEDVCRSVDTKEQREDAGKAG
>Alen_Al4_ctg01_-_Alen_Al4_ctg01g376t1	MPDSATVATALLLTAASALLIAAMLYPSAMLRWFQRKRYQYEVTFSLYMLTSTEKFIFNSVLFLLLSLLIIAASLYLPEHLSIIASRIFYYYSGNENAHASLANKGLPEPAHAHGAGLAGNGRGFMEP
>Alen_Al4_ctg01_-_Alen_Al4_ctg01g377t1	MDEHYAKRSLRADSQQPPAGEAVLVRCPSRALSRLRTLNEAEVITLFTPVVPHSPSTSLVRDMDPFEPLGRALPRQVRHVPFRMDLGMTELHPYFLPASGVVMVVICATENVLSHNPEAFERQLHFAQNIASKVEKDTSMATVPLVLLMICGATKSPTYEQAVRNFPVLMTTDDYTPSTLERAARVIFG
>Alen_Al4_ctg01_-_Alen_Al4_ctg01g378t1	MPSIAEEQPSLSDALESLHKASQTPAKQRALKVSGVIDTICRHAFADGLDEDALETVVHIAARKTELDQTSVTTLIKNLYPAQRVSGHVIITIVAALGQGKGKPSPGTQDSLVKWLILVHEIIDDASVLSRLYGVLFGMLDTISIRMSLCHLLSLITRRKHVKPFRIQQLLELSRGLGNEPALQGLLRVYKDYYPDIILGSASTSRKSFAPQPDEEWRARISTIREAQSSVDISMSEQHNGFKVARHGPKRTKASVIPDVHTYHATEGSVTLEGIDDVQSFVERLDRIEPPGQLISFLTDPLLQKFVELRPSPVVSARTGLWLATCLEDRVSLTGRNAEDLAFSAGLFDGLLRHAQYTKTLLPIVPLFLKEYLSTWNGHDHADTVLALLAYIPGDSFED…
>Alen_Al4_ctg01_-_Alen_Al4_ctg01g379t1	MIFTRLLSLILRVAQFVFAAVVLGLTAYFMYERTRHGVGPFGRIIYAIIWASLSVLFSIVWMIPTKSTIASYGSDLIFTAGWAAAFALLVLWFNDANCGSAWSWTEISLSRGNYCGQWCAAQAFAFLSLVVWFATFVLGVITHHRLTRQPVMNEGPGKSFGGRRSRV
>Alen_Al4_ctg01_-_Alen_Al4_ctg01g380t1	MVGLLSMANHDLNSYLRQMDSFRAADQARETLVNELIEKFSGLLRDHDELKSDYLSERDNRRNYQSRAEEGQRVMGERERQLDASSFVLALIDGDGAIFQDALLQAAAGDGGSEAASRLHLAIHNHISCLYNNSGNWPIMVQIYLSLDKLAFKLQQVGLLRHPQELRTFAQRFSVNQSLFSIIDVGQGKERADHKIKEMLRTFSDNPTCRHIIFGGCHDAGYLLNLDQFKHNEAKASRITLLESTPAYRGFAELPNFKRANFEDVFRSDPLPESAPAINTAMSAAQSAPPSAQSPLVMRSLTNKTPPTASVAARVASPSPSTPAPSVSATESSEDSWASVGKVGTERTNSISILPTAKSKANTKKKYAYFNKSEERLDEPLPPRERAAVDALDARMKKN…
>Alen_Al4_ctg01_-_Alen_Al4_ctg01g381t1	MASNKKARTNPPYELLYWPGIPGRGEFIRLAFEAAGVSYKDTANESEDGIQAVTSLIDASSTGTDGNPPPFAPPALRIPGEGPDGKPLLIYQTPSILTYLGDKLELAGTNEAEKSWILSHTLTALDLNNEAHDTHHPVAVAKYYEDQKEESLKKATDFRETRIPKFLGFFERVLKGNEEKGQGKYLVGSKLSYADTTLWHVLSGLLFAFPKEMEARKGEFELLFGTFYESVKEASGVKEYLASDRRKPFSMGVFRHYPELDRQ
>Alen_Al4_ctg01_-_Alen_Al4_ctg01g382t1	MTMGMIQRTGCMSWEANRLCGAIQNGHRQRKFPVVNWHARAALTIAQALTDLENNVPDLKSSLRPLQFVSAREIEVGHGRKAIVIFVPVPLLQGWHKAQQRLTRELEKKFSDRHVLIVASRRILPRPKRSNRSRTSQTQKRPQSRTLTAVHDAILSDLVYPVEIVGKRLRTREDGSKVLKVVLDEKERGGVDYRLDTYSEVYKRLTGKGVNFEFPQSAAEY
>Alen_Al4_ctg01_-_Alen_Al4_ctg01g383t1	MRNSTGSPRVQPFFSSQPSFSRLVKSFYSLYQPSFCIDYTFASFLSYTFYHPTANMTASEVCSESPCPLLPSTLIKSEMKQVPNFPAETPSDPTAAGLRVSHEYKAMVATVDAARKPSSLSHRVENASESYDGDAEYVHYSYPTESPDEMKGALSVCSRDRGRYRSISDRTAAPPSVRNSHDIIHYRRSHSLPPVYDESWQILYITELRRNGELRLTQDELMEVFGLGDQRFSVADIFLEA
>Alen_Al4_ctg01_-_Alen_Al4_ctg01g384t1	MLTVAHTYELWSRAGTLLDVNKSINLVERRLSTYQSHSPILLIANTDADPIPIIHAVRVHCFQVKVHSSVASSTDIRRQDFEAWLQACLRIQEPTQTANDMLKVFLELSEWNPAIRQLVSLADRRQSPYTARQMVPHSANGACGDMKSAMIEFSRVLFPAFASTPLPQMPGTTTPWALPHGSGTSKNCPMLLPTVEHLDVSNPDEDDDKYSALRRGRAAYRHNASPYDASRPVAEHTHRRAQYGRSRSLPPRYGTMVMSYDHHTFHGTSPDKEEHNAALLEDFGKTSEHHLIYPGPMDLRQGHPSERRCLRRCQ
>Alen_Al4_ctg01_-_Alen_Al4_ctg01g385t1	MLRDFLKHSKHYDISTALVKEIVSPEQTVVSAGVIYFSEDALRAEQERLKAQRSLHEDVKVKTAKAGKQDEVTRICIKLHDDPDIKQYGRINIKQHYLDPTKSYQPIHDANININDRKARREKHVPDRNEPDAPFYQDLIAPFDVSHPALQSRLEHLYQHVFEDDKEYFFNLRAALRAGQ
>Alen_Al4_ctg01_-_Alen_Al4_ctg01g386t1	MADSVDKSFMGMPGFVVDFLMGGVSAAVSKTAAAPIERVKLLIQNQDEMLKSGRLDRKYDGIGECFKRTASNEGVLSLWRGNTANVIRYFPTQALNFAFRDTYKSMFAYKKERDGYAKWMAGNLASGGAAGATSLLFVYSLDYARTRLANDAKSAKKGGERQFNGLVDVYKKTLASDGIGGLYRGFMPSVAGIVVYRGLYFGMYDSIKPVLLTGSLEGNFLASFALGWAVTTGAGIASYPLDTIRRRMMMTSGEAVKYSGTMDAARQIVAAEGIKSLFKGAGANILRGVAGAGVLSIYDQAQLLMFGKKFKGGSG
>Alen_Al4_ctg01_-_Alen_Al4_ctg01g387t1	MPPIPTYKNAPIKADGVTPQTEDASNLAPTPTSRYVPATTTVDSSSPPAPQPGARPAPTAYVPANHSDPPAPQPGYSATHITTETRVQAPPPQFTQPPPTDSQLAGRSTVTSTTASKPGPTTLNMGPVASPFQSANAGGAVTTATATEGDARRSLEHPPGYQQAPDNAPYTQGGGIGGGESAGEGIGAQAWNMLSRAGEALKGAEEAAWEAVNKR
>Alen_Al4_ctg01_-_Alen_Al4_ctg01g388t1	MKFSTIVSLGLTAITALAAPTPSMIDVKRGIEKRAASLEDVATVGYATTNGGTTGGKGGKTVKVASLSELTAAVKGDEAAIVLITCPIKGSGDNIKVGSNKSIIGQNSKVVLENFTITVKGVKNVILRNFAMQKVVGGDAVAIQQSENIWVDHLDLSSDRDHDKDYYDGLLDITHAADFVTVTNTFLHDHWKASLIGHSDTNGAEDKGHLTVTYANNYLYNLNSRGPSFRFGTGHFYNNYYENVSDGINTRQGAQLLVQNNVFVNSKKSLYSTDAGFAVESGNDFGSGKNTASKGTLAKTPYTVTGLLEASEVKSAVVGTAGNTLCF
>Alen_Al4_ctg01_-_Alen_Al4_ctg01g389t1	MAAEQTKRDIVIIGGGIIGSTTAYYLSQHPSFNKERDSITLLEATKIAGGASGKAGGLLGLWAYPSCIVPLSYRLHKELADKHGGAERWGYRAVHCGQVDMYGVLKKNENGSDGVNGRSENSVSLEKRSKKAIGLLRAAGVPKDLDWIAAEGIQSYEAMGTPATTAQVHPYQFTTSMAQLAEESGAKIVYGSATEITQEAGAVKSVTYKPKDGSAETTLPANTIILTAGPWTRTIWPQAPISALRAHSVTIRPSRPVSAYALFTSIDLPRSPSSKRGETVTPEIYARPNNEVYACGEGDQLIPLPTSSDLVQVDDKRCQDIIDHVGTVSEELRDGEVTARQACYLPNVSRGQGPLIGETGVKGLLMGAGHTCWGIQNAPGTGKCLSELVWEGKIGSANL…
>Alen_Al4_ctg01_-_Alen_Al4_ctg01g390t1	MADFAPPPGPPPPKVPEGWKAVWNDQYHEWFFVNIYTKQSTWEKPTQPVYPPGEAPPPGAPPAYGGAASSHPTGMSEKSTFSSNNPYGSQQPGISEDEKLARRLQEEEQARAGRLSGDANRGASNDYYGAQQGGYGATGPSIAGQPGGYPQPGGYSQQQYQAPSTPHQQDDRSQSKGKGLLGKLLGKSSHGSSSHQPQSYGQPAYGGGYGGQGMYQQRPGYAMPAGRRPGGGGMGMGGVAMGAGAGLLGGAMLGSALGDAGDGGDTYVENNYGDDGGDMGGDGGGFDDGGGDFGGGDF
>Alen_Al4_ctg01_-_Alen_Al4_ctg01g391t1	MADLAASGELNQPVLNLTPEEKRVFQHLFQQADTEKLGVITGEIAVKFFERTKLAPAVLGEIWQIADTENRGLLTMAGFCQVLRLIGHYQAGRDPSPELAYRPAPLPKFEGLSVPAAPPAAPGFSPQTTGPIQPQISGQGPIRVPPLLPAKASEYAGLFEKSGAVNGVLSGENAKEIFEKARLPNEVLGRIWNLSDTEQRGALNVTEFIIAMHLLASYRTGNLKALPNTLPPGLYEAASRRGGLPPPPGRPDQASIPRQFSGQQNIPRTASPLGRQPPFGPPAPVQQIQTGSDWLISPQEKASYDNLFKGVDTMSRGFITGEQAVRFFSDSGLPEDILAGIWDLADINSEGQLSKDEFAVAMYLIRQQRKGGQLPTTLPSNLIPPSLRTRANQQAPAVA…
>Alen_Al4_ctg01_-_Alen_Al4_ctg01g392t1	MTTGLMRRFSSSARTQLPRSTSTSLTSLTSLTAPRLLGLKQYQRNLTDARPRQASVSRSWFTSTTPCAYPELDEREQKRLDERNLKLGNTIRVLHDRLPTLLISPLPSDILSPHISLHLFPSTHPHLPTVSGKLAYTAALWTAPVAWGRVPVVGNVKLKILSERMVKNGCGPSVPAHMRNEKLIVKWQTCGKSDKENSRHVSEAFESVTNIVAGSRPSDEEFTGLFVFEFDEQGRVVHHTIEHTEEGHNWDKTMRFISVTDWLLGRAWGRREETPSLAFVQCEKEKSGRHRSGRS
>Alen_Al4_ctg01_-_Alen_Al4_ctg01g393t1	MSSGKRIVFTGGSGKAGRHVIPYLLQQGHKVLNLDLIDFPDPSAGVFTLKTDLTKSGQVFNALTTHFNFEGYEEKNIPSPPDAVIHFAAYARNMLVPDDECFAANVASTYNVIEAACKLGVRKIIIASSETTYEVCFGQGDIDYQCFPLTEDMDLNPMDSYAISKLCGERAARGLARRFDADIYALRIGNVIEPHEYERDFPKFINEPKIRKRNAWSYIDARDLGQICHRCVDKDGLGFQVFNATNDTITATFPTRQFLEQWCPNTPITRELEEWEAPLSNKKIREVLGFKEEHNWRKYYNPGR
>Alen_Al4_ctg01_-_Alen_Al4_ctg01g394t1	MSPTPSEAVAKVAQVAAGTKSSAKEYKRESNTARVVGAGCAGLAELMVFHPVDTTAKRLMSNVGKIESASHLNKVVFRDAANASVGGRFLSLFPGLGYAAAYKILQRIYKYGGQPFARDYLARNHGDFFDQTFGKGNGKAIMHASAGSLIGIGEIVLLPLDVLKIKRQTNPEAFRGRGVMRIVADEGFGLYRGWGWTAARNAPGSFALFGGSAAAKEYLYKLEDYNKASWGQNFVASIAGATASLIVSAPLDVIKTRIQNRNFDNPESGMRIVSNMMKNEGITSFFKGLTPKLLMTGPKLVFSFWLAQTLIPAFGKVM
>Alen_Al4_ctg01_-_Alen_Al4_ctg01g395t1	MNPEVLHPDAPSTRAVRPPCPRSPADTSLPRYDYLFKLLLIGDSGVGKSCLLLRFADDTYTESYISTIGVDFKIRTIELDGKTVKLQIWDTAGQERFRTITSSYYRGAHGICVVYDVTDMDSFNNVKQWLQEIDRYATEGVNKLLVGNKSDMADKKVVEYTVAKVPPLEPEESAAETNANQEFADSLGIPFLETSAKSATNVEQAFLTMARQIKERMGTTTANTKPTVPIGQGQGVQSGSGGGCC
>Alen_Al4_ctg01_-_Alen_Al4_ctg01g396t1	MANSSTPSNGHPLSKAAKWLFHELGLHTLRHAGKDVYIIILTRYLRMYAYGSVALVLALYFQAQGLSDAEIGFFMTLTLLGDVVISLLLTLVADALGRRRTLMLGALGMAGSGAVFATSSSYAALLAAAVVGVVSPSGNEIGPFRAVEESTLAHLVGEEKRADVFTWYVAFAVLGTSTGLIVGGQAVDALAARTGWTELDAYRAVFWIYTIVGLIKAISTLFLSQNCEHKKLPRPQNEGETDPLLPAEDDDTHSTTTSNGAASIAASRKDEKRSWNPFTSISPKSRTILFKLCSLFFLDSLGSGMVPFSLINFYLDRKFGLPKGKLGGIMSATWFLSTTSTLFSASLSRRLGPIKAMITTHLPSSLFLGILPLAPSLPLTIAFLIGRSLLSSMDQAPRS…
>Alen_Al4_ctg01_-_Alen_Al4_ctg01g397t1	MASAFSNPPRRILFLDAYDSFSNNIVALIEQNTDAKVTKIYIDETRFSTSKSLDHNNLTFAQYVQDFDAVVAGPGPGWAKCGKDVGLMNELWKLQNEEVLPVLGICLGFQSLCLAFGADIERLVEPKHGIVTSVLHKGQSMFRDVEKLQATQYHSLQVKLNHPIQTTRAVRYPAQLWESTETCPQLEPLAWDFDSERNGAVLMGVKHIQKPFWGVQFHPESVCTNKEGSHIIRNWWQDAQSWKRKRMFSHDARKTTLSPSQLRPMTIHDFRRDLGFYAESDSKKNPMQKGVAEIDFLTKDRHGLLPAELASLIAYGDEQSLPCLPSTTVHCATTGSGRLTVEDVCELLEVPRHEAIVLQSGLQENLVPMAVGTGRYSIIGLVVPEETLRLHYYTGSKIM…
>Alen_Al4_ctg01_-_Alen_Al4_ctg01g398t1	MATQGTSGAGDGLKLTNRLNESCSPYVRGHMNNPVAWQQWGPEALELAKKSNRLIFISIGYAACHWCHVMERESFENHEVAQLLNDNFIPIKIDREERPDVDRIYMNYVQATTGSGGWPLNAFITPDLQPIFGGTYWPGPGSTMGGDHIGFVGILEKIRDVWQNQRQRCLESAEEITTKLREFTEDGNISRKDGADHDALDLDLLEEAYQYFQNKYDTDYAGFGGAPKFPTPSNLVFLLKLSQYPRAVADVVGVKECTQAKDMVLATLDAMNKGGIHDQIGNGFARYSVTKDWSLPHFEKMLYDQTQLLPVYLDAYLMTKSPGHLSAVHDIATYLTSPPLQSQSGGFFSSEDADSLYRSSDKEKREGAFYVWTLNEFQDILGERNAEILARYYNVNDEG…
>Alen_Al4_ctg01_-_Alen_Al4_ctg01g399t1	MPALTADSAWPLWDSEPFEGALELSTDNGVDNTVVHGVQRPWLFHYKPKANSNGRAILILGGGGYVELMVGREGVQIARWLAGLGFDAFVLVHRFPNAKSSPQAPLDDARRALNMIAADGRSAKGLGICGLSSGGHLGAALLADYPSTWTSPSQSSTLPKIDFAIIGYGPISTNAKGRTIIPNKAALQPPEKQELYDVVQPDVQLSTAPSTFIVYSGNDPVVPVINACRLAEGVTKAGAAVELHVFADAPHGFALDTADLPVSKWPSLCEAWLEQNGLLA
>Alen_Al4_ctg01_-_Alen_Al4_ctg01g400t1	MASPLKRKAEKPAASTPAKKQKVIVPEYHTAPQRRDETGEVVWPARKQQIERAREIIRECAGAHKPIVILPDKDADGLSSGAILLHTLTSLGLSADLISVYFPPKGSNVHDDTTKAALTELSPAYIFILDQGSRKGAALLDVPHTCLIVDHHFAEEGGFPEGAEYVTAHDCPPVATTSLLIYHICLPLHPDLGDKISWLAAMGTHGDLGTTLKWQPPFPDMTATFKRHPKKAINDAVGLVNAPRRSAAYNVKDSWDAVISASSPVMIKTTEKLHDAAFEVRRETERCTHTAPKFSADATICVLTISSAAQIHPVIATRLAGHLKSNKLEIVMCANEGYLPDKVNFSCRIAKVARGREGDDKVDIIKRLEAIVEGHPELRERLGESFARGHKEASGGIVG…
>Alen_Al4_ctg01_-_Alen_Al4_ctg01g401t1	MKSALVLLAAVASVSAHSTWQELWVGTTDQAGKCVRTVKDNSPIESLTSPDMFCGRGPAKSDGLCEVAAGSPLTVELHAQPGDRSCANPAIGGAHYGPVLVYMAKVADAKTATTGSFFKVAEDGYKGTTPTWGTEILNANCGKRAFTVPKNIAAGNYLVRAEVLALHAGAGNPQPYVSCFQVKVTGGGSANPAGVSFPGAYKITDPIFSKAIYDSSFKYVSPGPAVYSG
>Alen_Al4_ctg01_-_Alen_Al4_ctg01g402t1	MPKFVPRQRKHKVVARQKLAHNDEPSEANTEQILPAEQRERDERRRAMKDDLVRESQSKMSGKKKKRLDKYIDTKLKKEENLELLKKLASQSHKVDTSLFQSSKKLGSGSDTKREALRRALAERRAGIDVEKNEGLLFEEHTVREPEAESSGSDDDNKNQATPTTKSNLPKISTTLQRKRSRSPSKSPEQTHSTPSEPATASVGSFGLFGGGLKRPLEVDESGRPVIQVRKRRKAKGKPIAIEEDVAWEGFSSDEQDAKEEEGDADGAETVESTDESDIEEDEEGTDPESEDSEGSEEEDSEEDSDSDSESSIDDEESKIARKERTSAFKAWATSQRNEQIGFVPTNQLEYTIPAKPVNFTPRAPEQDPLPAELETNTATDATRKAYSVAVERSREIQE…
>Alen_Al4_ctg01_-_Alen_Al4_ctg01g403t1	MATTIEGYEVTPAPFPARSKSASSSIQGMETTATSMSFADKILITVTQQGRLAHWVHVPLDISATDASVTSQAYLDRDDEEPASDLLPMHHLTATTILGGTIPELEVLGQTLATQIASAIKTQNDRETRMVVLGMGLDKRMSGRTEFSELVGLVLEVL
>Alen_Al4_ctg01_-_Alen_Al4_ctg01g404t1	MNDPNLNTLLKWGVENSKVSDGAEAPKTTLNPEALAALFGGNQKSDAQMMKDNMEVIKREDCDMEDRLTAFDNFEQLIENLDNANNLESLGLWIPLIEQLENKEAELRRFAAWCIGTAVQNNIKTQEKLLVLGAIPILVRIATGDDETKVKKKAITALSSSVRNFQPALDDAVSHVPADFKPSEKLDANDMDSVDILINKLRESL
>Alen_Al4_ctg01_-_Alen_Al4_ctg01g405t1	MEEEVAALVIDNGSGMCKAGFAGDDAPRAVFPSIVGRPRHHGIMIGMGQKDSYVGDEAQSKRGILTLRYPIEHGVVTNWDDMEKIWHHTFYNELRVAPEEHPVLLTEAPINPKSNREKMTQIVFETFNAPAFYVSIQAVLSLYASGRTTGIVLDSGDGVTHVVPIYEGFALPHAISRVDMAGRDLTDYLMKILAERGYTFSTTAEREIVRDIKEKLCYVALDFEQEIQTASQSSSLEKSYELPDGQVITIGNERFRAPEALFQPSVLGLESGGIHVTTFNSIMKCDVDVRKDLYGNIVMSGGTTMYPGISDRMQKEITALAPSSMKVKIIAPPERKYSVWIGGSILASLSTFQQMWISKQEYDESGPSIVHRKCF
>Alen_Al4_ctg01_-_Alen_Al4_ctg01g406t1	MSSTSSNAVKASDEITPLLASVETGPNAEPNDLPTQEISNTDGAHADDENAPLPRAQIFLLCYTRVVEPIAFFSIFPYINSMIEHVGGVEKEDVGFYSGLIESLFSFTQMCVMIFWGRASDRYGRKPVLVLSLLGIAVATTLFGMGQSIAQMIAARCFAGLFAGTVVTVRAMLSENSTKETQARAFSYFAFAGNLGMFVGQPIGGALERPAEKYTRVFGYQFFRDYPYALPGLVTSIVAISAAITTMLFVKETLHTHKDKKKATEVPMTTRQLITSPGVARVIFIYNYVMLLAFTFTAVNPVFLYTPISLGGIGFPPELIAATIGLAGASQAAWLLLIFPVLHKRAGTGRILRLCAWTWPVFFAIHPCFNLLLRYGKSTVFWTLAPPMLVLGSGVAMAF…
>Alen_Al4_ctg01_-_Alen_Al4_ctg01g407t1	MATTTATTTTTDLPATMRAWQWRTCTTTLEDALTLNPSAPLPNRTLAPGESLIKIHAASLNPVDYKLAELPLVGRFAIPKPATPGLDFAGVVVSTSATSTLSVGQRVFGKLEPKQQFGTQGEYVIGSKAGTVPLPDAVGFEEGATLGVCGLVTYQCLARNLKAGDRVLVNGGSGGTGTFAVQIAKALGCWVTTTCSGQNVQLCKDLGADEVIDYRTRNVSAVLQENRTPFEMVLDNVGEPTELYWKAPTFTKPGAKYVQIGSQVSLGFIYDLAFRFIVPTWLGGGQRPFSFGLTSTNFDDYKALADLVVKGQVKPVIDEVFEFERVDEAYKKLRTGRAKGKVVVRVQIKS
>Alen_Al4_ctg01_-_Alen_Al4_ctg01g408t1	MVKISPWRAFKLLLTLFFCLLFVLPTLWLALPFHTVSVEERSTYIQNTLASGQTAVAAWDVKPFAKANEDDLDEGWCSECTSVLFHWRFARMYNKVHILLAPHHSHSEDKDFDLSGNFKSAEEWNQDGVIGSNKSWSPYFIDLWWTPTTVPGARQDERISQGWFYEVDRHLIQHAFVGWSTKIDVRAVIPEPGVVEFWRGTAIDRAFNHISDEWAETYNKSDVFQDRTRTPEIYKQMRRFERDIDLIASFEASENADVQDIVVKELKGDLPSRTWPVRKALLAWVPRFIVGPVMLFKAADDFIAPRFAGFLVALFTLPLIYIGVVGCCWISAGGPNIFRWISGFWMTKLLVPRRWRKAPETQHLWGPSGPVDPIFERRKLVR
>Alen_Al4_ctg01_-_Alen_Al4_ctg01g409t1	MNLLYRQISALVRKNWLLICVKRLIITCCRALILPLVVILVLAHSKNFFASSQHWGVSSAHDLRILQDSLLASQGHDIVGFVDNGMKNREVSLIITSLSQQVQAAGKVAKVYKTAWDLTLDCRTDDNDTSPCYDAVVFFSSPSEGKNFSPAGYWNYTIRGVCSGSVDIRVADSSPERDLLPLQRAVDAEIISKSANTTQLSADLQIIAFTDQDLDSLVDSRTATYLSMSINIFGPLFTLSMVEIVYHMTSFVSRERELGMSGLIDIMLPGGFNARGRMVRQMATYVSFAVIYFPGWLAAGTIISVVFYPDYSRFMSLGFVLLSGLAFTGFSLVGASFFRKAQLGGSIMITITLAFAMLPTVLFQRIPTACGTLSFLFPSANFTYFITGIATSEAAGKPV…
>Alen_Al4_ctg01_-_Alen_Al4_ctg01g410t1	MGDDTSKPTVMVNIRNPNKVNEMMNFFTVMAAGIGISTSYFEFARNQLPPRVDVKALVFIVYYGLIVACYPAFFALYLTNERISKVRSIQYLNGVWPVPLWLSYLFFDGISVVISAVSTALIAACSPVWHGMGRMFVVFLLYGIVCALISYIISMFAENALAAWFAMALGQVILYFAYFGAIVGVQSTTPYADLESLMNYLYFGLGLVSPVVSLERALFIGLQQVGLMCNGHASRSLYLYGGPILYLAAQAIFLFILLVWLDSGFKIPPTRSRRSISDTEAMGMLNADLMHERKRMASPGTELRIEDVSKAFGKNLAVDSVTFGVQTSEIFALLGPNGAGKSTIISMIRG
>Alen_Al4_ctg01_-_Alen_Al4_ctg01g411t1	MSAPHEYHQPNAPDEDSDLELDLEELDPLAGRPDPAASSPPPRQTKEQRRPYHELGARIPLRNLRVGRLRGNRRKEEAEEEDLRGLIDDDERENRNSAGSYGHSGDDDAPLLPTSTNPRRPTPRKPSALSKLSAGLRLPSFLSKPDASTIQLGDDAGDNDADEEHDPTTQRTISVGALQTSRFPANAVSNAKYTPWSFLPRTLYNEFSFFINMYFLLVAASQIIKPLRLGYLSTYIAPLAFVITITLGKEALDDIARRRRDAEANSEGYTVLKFEENSVGNGVAPGQGSSRKKKLRKSNKETDRLAEMNDEEQQLSAKGLATCTYFEVVKPSKNLKVGDVVKLGKDQRVPADMVVLKSLAADNAPAPAELTSNNKRPTLIDGEDELQPETAKVDSAIST…
>Alen_Al4_ctg01_-_Alen_Al4_ctg01g412t1	MDHEDGPNFSYAYGDRRPSTPAASWNPALRPHQTREDTSPAAAAAAAAAAAAAAIAPPSQPQPQPQPPTQHMPAQQIPTQPESSEDEDESEDKGEVAPPTPAKAPAPAPLPPPVPAPATPAAPVPPITPASAPVSSSDETSEEEDDEEDDSDDEEEAPATATQSSILPPQPATPKQEDTLVHATRALNIHEQTPTHVGRGPAEPSESEEESSEEEEEEEEEEEEEEEEEKEEEEEQEEDSEQEQQEIALPDRPGENYEHQGETTILEDAMIESASVPLVEDTEAASDDWGASAGDGFDLGAPQPMETPLAEAVGTTVGDDMIGNTTVGGNAGDDIDWGNTEEQEDFFGGGASHTIESAPTEAETPGAHVVQALEPAPAAGDEWDLDLDLDDEFLPDADD…
>Alen_Al4_ctg01_-_Alen_Al4_ctg01g413t1	MEDILGYIRRAQAEDRASLDELNSNGQRSNQAPNVTQQGPRMAFTISKELVLGCTAPGCSRIMTGGLSRCTGCRAALYCGREHQHVDRPAHKSACSKIRKANVAYQEAERQLRDEEGDAIFTEGPPHFWGIHETRPYMRARFTLVESLLLVNTETAVNAALDHLLAMLQLCRSDNMGVRDVVPALFLRLRKDQQAYDFCKWWVTTGQEGDYDWGDKTSPYLATKQADVFEDPREFVRNATISLSFAVSVTLVKIRLLMDLLALQRDRQIAAPKLPSEITDQGFVHCTSAIIQRQRQELEREEQTLNITMLRKHVEQLFTAVKESNKHFWPALVRPGSHLEARPMMHGFGDIGQMQVVLRANYNAWAETEGAIGVIEELLQS
>Alen_Al4_ctg01_-_Alen_Al4_ctg01g414t1	MKFGTTLRKSVYPPWKAQYIDYDKLKKLLKDNEDDDSWTAEDESAFVDELANVQLEKVHGFIIEVAQGLRDRTTKCEKRLEPLAVGAKEEKDAEGKDSKDKNGEGLLSDAVKNGEAANKEELSQAEREKLLKEVLAELDKVTKEVKELEGFSRINFTAIIKATKKHDKLRGKSYKLRPFIDARIARHPLHTEDASPLLYRLSALYSFVRQSLEGKSKETLSFSEGSTSGEGFTSHKFWVHMDNLFEVKTVILRRLPVLVYNPQSAKIAEGTQRDPTITSIYFDNPNFSLYTDKANGKEDAASLRLRWYGQLEEKPEIMFEKKVIKEGNASEEVRFPIKAKYVQPFLEDKYHMEKSIEKLEYRPNKDQAKLDSFKKAVEDIQGFVKEKDLQPVLRANYTR…
>Alen_Al4_ctg01_-_Alen_Al4_ctg01g415t1	MSSIIRDVLALSAVAAVAVAQDPAPKLDASCADAVIFMARGNTAPYHDFRTFPFADATCGKLRAEGKTCDYIEVVFPYGGDYCKQIGEGVRNGLSQITAFNKKCPCTHLILNGFSQGAWITGDILAGPGGCSQITTGLDPTSAPGNAIAAALLWGDVKHEANQPYNVLDGSNLQKNGRDATSLARLNRYAPVLRSYCSKGDPICANGDDVQKHLSYFEKYTDDASTWAVGKLNDAAPLCAAPTPTPSASSTVVPSSVRVAAVASSSAATSSGAAASSVAASSVVASSVAASSGAATSSGAAATSVAATSVAASSGAAASSGAASSSVAALPAYPTSPVYVAPFTAPQVYEAMCVPRITIKYVYA
>Alen_Al4_ctg01_-_Alen_Al4_ctg01g416t1	MEDILELLHQRKQQGADQTCAMDWTYVGDNPTFYDVWIARGMTGDSFFKIPEDGSWDFAWNLFWNDDKARSRLTATKPFQVFACWNGVTSFTAKPLLDGLIRFRAHGPGECFQGEPKLFAKDMWANGYGKIAVVPSVNVEYSDEATRKIKALKGYVARHVANEGDDGRIEWETKPPEKVKCMLDYHHQTFVDWDEGLRPRVSGEAAR
>Alen_Al4_ctg01_-_Alen_Al4_ctg01g417t1	MRTPLLSVLGAFLGLHILSTHANVICTGSQYLDDNGVPTPKPAKALHESLHRPNNGACDADFSDVGFSTYRTESTVFTITGTDQNENLESCEDSFNAIIRQCIEEKNVHGGTLLTNGPLLKPAKPVKPAKPQPKPAKPQPAKPPKKACPLKPQGKGKGKGGKLTSRDGSDCEEEVGLEKIWGDIPGTKKAIGDSALHFNVKEAQSDAWGITYLHDCTGILISDPKFVIVAHMQEDGPGSECIMLADAAQVKKYLQGPLQEAIDQADPTAKTQIHILYTQPKVGRPLLSEFEKFFKDEWFFEGKVNKIPYFGGSGTGEMKGLKGKAAIQVIGGKGKGKNKLKVFWNSDTPIRNESF
>Alen_Al4_ctg01_-_Alen_Al4_ctg01g418t1	MVPIDTQAEERSRAIDRALEEDAKVRKNQVNVLPLGALAMRDIVKQLKNNDEPGLTEKELIERRYNIHQCVVDCTKALVHLVKSSEAQLEEDTNNRYNYLCSYIAVPQNYATLNEEVGWAIGVLWKDPSVTDAFQSSADSDLKEPSTYFFREIDRIAAPNYVPTEADIMQSHKGIRGVSEHRFLVKGLSINLIDVGTQRCERRKWIHQFDNIAAILFVVNLPCYDQEVSGNNAMTEQIELFDSVVNTEWFTSTKFILFLNNTNYSGGTDAEQASEYLLQRFSQANRGKRRLYLHLVDPHVTSNIELVATAINDSNH
>Alen_Al4_ctg01_-_Alen_Al4_ctg01g419t1	MSIKQSTRSQATLNTRTSLTITSAPSAFAPDDETCIGSVWTLTPSGYDGVTIHTSIGRILTRGFDPSCYPPDFGPGVIYSPARCPNGHVPATTIVNTYNATRTVTTFTCCPDFRGDWTLTSVVTSASPSCFTSNTGKNIRLLGWTVTDNFGPNDGPNIITADAWMARYVAVAYESSDAPRLGLSPTTTSASTLVLNSTAPATSSPSSTAATPTSSLTTDKLSARPRLSTGTIVGIVIAAIVLAVALVVSTLLFYRRKSKRHKTRQSEPQEVYFKAELPGDGKPHTELDETNAMREADGYSKPPEADSSHAIVELESDWTGWEASALLEVELSRNMQGNADMRGRQPGQRSMMRNSILQTPIDMVRRNPEQ
>Alen_Al4_ctg01_-_Alen_Al4_ctg01g420t1	MQTFALLALTGFTSLVQSTPVAPAQPRSLPQARPHIQTRQANNSSSPACAQVSQAIYGDGTTVAKQIVPAGLAWDCINSVPFNATSGKLLIDSLKPYIEWQSTLTVLKNPPAEYVEKVQPAVDIMGGLDQIASDIDAGKFNNEYDFGWALYTLIQSAHDGHFTYVPDSVGGIFQWGRNVPLVSVSEDGEQLPAVFAFEDVLGLQYKNISYTPSAVVKIDNTETTEFLQALSQLGSLQDRDALYNNVFYELAQVGLGESGSGTGMFTGGGRGRYVYPGATTTFSFANGTERTIQNYARPRYDFRNVNTGEDLAKKWFSYGNAASAQAETVSTAASAATAPGYPDPVSLGPFNLINGYYIDGAEYTDVAVLSVPNFVGSSSAGVPFQKTSQEFLAKALADG…
>Alen_Al4_ctg01_-_Alen_Al4_ctg01g421t1	MKLFLSLSAGLLSASLATAAVSTDGSCGGTSKYTCQGSSYGDCCSQYNWCGASTAHCGAGCNSAFGTCTGNTPTTLKSSTQVATSTRTSAAPSSTPTKKISTDATCGSSNGGATCLGSSFGNCCSRSGWCGSTTDYCGSACQLGYGNCGSNNPAGTSSTKPSGTASASATPSASGGVLQCLNGKNVPYKMTSDGDYAELVEPYNLARAFKPSVVVLPQTQQNVQDAVVCAAQNGIKVQAKSGGHSYASFSSGGKDGSMMISLQPFQKVELDASTGITKVGGGVRLGNLADGIYTQGQKALSHGTCPGVGIGGHFTHGGYGHTSRHWGLAMDSIVAADVVLADGSLIKASATENSDVFWGIRGAADSLGIVTNFYLQTQAAPSSITYFAFSFSTMYDSKT…
>Alen_Al4_ctg01_-_Alen_Al4_ctg01g422t1	MPVFNLGLLGRFQVSRVKGESPTAAASKENVEPKGAPPAYSISFEPFYSQGLRGPPNAQPSPCKKQQLNRYVLEIIAITFNADFDKLNAALYKQKIAEQTSSILCDQERADLYRLSTIVRKVHKQLRDRQISTVDEEDESTIRNCIIMPAASVSGYRNTACTILDLVGWYGEHAHHRTQWSDTIPGFWESDDTHVGLFEGRMDELYFVKAMEALKGMIYLFCGSDSVEQVFIRAFENCRRRCGLLPVTHTTIFWLVRPGYDRLTRAVASNRDQQLRDLGMETFATGSLHFEGELECDFCKH
>Alen_Al4_ctg01_-_Alen_Al4_ctg01g423t1	MGQLSPPPNWPLPPIPLRSPLRPSGRSHGIVGTTSVGNYTVGKHSRFSASNSSSSSSSHYSQDDAAETGGYFERNTMLVQEQTDQKKIEFTLRRNSKQTPSLDDLSNILYLRGRLQEMGSTFTAEGEMLTYGNPPLNADLEQMLRLGAMYDDQWNVFFTNYEVKQDSSYDLWSDLKVLKRMLQNEGIFFDDQHRRLNYGSSHPKLIRLSDQYDVIREDWLNKTMQNLHPLQRRSPAREEIPETPTNLGWKFLFEDSDEEELARKKNRRSSRLTVVVEESQPGNGPGPMVEEDHLLEVETYPSPVTPEISKIVHDTAYKPLPQAPSMRSLTTGAPALLHGSSPLQATETASMLLRDVESESESANSLVEANEPSHGIENRRPEQVSVLALLVEDERRRAE…
>Alen_Al4_ctg01_-_Alen_Al4_ctg01g424t1	MEGYPSLTKKIVNSPLRGKAHSLPEPFICSDPDRGVVPKFHVCMRSQQDLVPDMEHSTKPCDSPPLSLANEGVFKNPEASTHEDSFGRTQTPNSGEKTITELRQRFEKSSPNQEHNQSRRGESSSRDHRPIMSAFVPVESSAVGQDFGAVASVDDYILPALTFNPTSDLPVEHTQSSRGTENSSSLIELESSNLQHGEENLAKSSMSNAGWACQKFATVQDGISIIDFAYLHAAPSPMLSPMFDTERVHFGSRTKFASSIHNKLKSNDSNTSTQGPVDFDKRESKSVTGNVGSRAEGVNNTQGSIDGTLLLLPATVYSPPGQIEKLDNTHSSDKEDLLLLPASVYTPPSAVDRDVAHVVDEAPMHLFLPATVYTPPDPEVDDISQDAAFHSLDRTSNQE…
>Alen_Al4_ctg01_-_Alen_Al4_ctg01g425t1	MGWFSSDEKSAAATHPVNPDVTTSRLSGAEQDRYGEHFSQIGQQAGDKIREGIHDITHARGSGAEQDRFGQHLGVGQSGYNAAKAEAQSGYNKAKAEAQSGYDKAKSAADRALHAKGNGAEQDRYAAHFGGLFDPVRAAAMSIVSSGGDVSKANYHWLGHDGWERAKFLAAQKGTTGSEQDRYGAHFTGFGQQAAQSIKDEWNKLRN
>Alen_Al4_ctg01_-_Alen_Al4_ctg01g426t1	MRTFDVLNKDGKPKAVRHYGEWSKTDEGDKRLLGKINQGFISASDALAHSLPQEARLIQDQGPLAGLTHLLRALYGSTSSIVSIPGSSGPS
>Alen_Al4_ctg01_-_Alen_Al4_ctg01g427t1	MHLSSFIVALGACGVLAAPVEQQPLPGNVRHHAGPHKVVDPYTPDNRNPYDKKVDAQADKLHPLPWRNGDGADMLGPRNRERERQNPDLVRPPSTDHGNMPNMRWSFADSHIRIEEGGWTRQTTIRELPTSKELAGVNMRLDEGVIRELHWHKEAEWAYVLEGSVRITALDTEGGSFVDDLEKGDLWYFPSGHPHSLQGLSPNGTEFLLIFDDGNFSEDSTFLLTDWVARTPKSVLAENFRVAPEVFRAIPEKEKYIFQGSNPDSIEKEIPSNSPGYKKSKLQFTHKMLAQEPLNTTGGQVRITDSTNFPLSKTVAAAHLTIQPGALREMHWHPNADEWSFFIKGRARVTIFAAEGTARTFDYQAGDVGIVPRNMGHFIENLSDDEEIEVLEIFRADKF…
>Alen_Al4_ctg01_-_Alen_Al4_ctg01g428t1	MAGPSPRGASARGVDEETPLLGRIAKNSDSSHLSRHFKQDVSRNWADAVLLFGYIITGLLDSSAVFIWGSFVSMQTGNTVYLGLGIIAPSEGIRWVKALTSIVSFCIGSFFFARFHRHFSPKKRWVLIASYSAQLLLIVVAAVIVTVGDDVKNQLHWQVLVPLASVAFQSSGQAVTSRALQFNGLTSVVLTSNYCDLFSDPKLFAWDNVERNRRIGAPLLLLFGACMGGLWAHSSVGLAGALWTAVGLKTLIVIAWMFWTGEKDEE
>Alen_Al4_ctg01_-_Alen_Al4_ctg01g429t1	MAVDGLSTVSGELYTTGRTLNAFHAFLQLPTNLRARILQLAAPEPRTRFVEIYNYEAPTYTPRLRYVPQLPPLFHASRETRTFSIVHEGGELIHFLTPATEKRRFYFNFARDIVFLSSRFTPSGCSTETFRLRELYTLLPPSFMKKLHRVVVTYSSLDDFKAIGRVLCSYVALETLYVGMSDWWSDRSVKTRLRRGRPQVEYVAGKVEGSLKLAEAEETDDESESDEEWEARLEIRKRRRVVECELRLDE
>Alen_Al4_ctg01_-_Alen_Al4_ctg01g430t1	MRVSAVILTIVAAVAAQSTYTATGVGCEPHDDHWHCPAGVAEPTTAPAAEASVDTVSATASGVCEPHDDHWHCPSGVAEPTFAPSAASAITSAASGSITTAPSASASHSHDDEDDHSHAVTAATCEPHNDHWHCPSGVAEPTTAPAQTRSTSRASTASGAAASESASASVSQFAGAGSVVGASQQGVMAVVLGAVGAFFL
>Alen_Al4_ctg01_-_Alen_Al4_ctg01g431t1	MRSFADAASAAVFAGFAIAQSITSSGTDRVIPTLAPQINALPSLTPTIYDNTAPDPQACPGYKASNVADNTHGFTADLTLAGAKCQAFGNDIAHLTLEVSYQAKERLNVRVYPKYIAPANSSQYILPAHLVDQPKWDGKTTANSSDLILEWSNDPSFQFKVSRVSTGEELFSTYGHVIVYEDQFIELVTNMVDDYNVYGLAENVHDFRLGTNYTQTFYAVDAGNTVDGNVYGVIPFYQETRYGMNGSATTAHGMYARNAHGQEWLLRENTITYRTLGGSFDLYFLSGQKEDRSSSALTTISQFQVGCIGTPAMQMYWTFGYHQARWGYENISVVQGVVDGYREANIPLECLWNDLDIYDLYRDFTNNEVTYPQAEFAEFIESLHANGQYYVPIIDSNIY…
>Alen_Al4_ctg01_-_Alen_Al4_ctg01g432t1	MSEVQQAEGQPEAGPNFLKTAAQSIGMFLLIQGGMKYFLKTPAPAAHTGQPHQVATAGGAGPAVSIPSWENRPQQLNDGAEYSHVPWNIAPMWPNGQELDIAMYISPSVAMPALKAMPKDALLIDEKKFVFGDYKQNREIHVEFTVPTEVQHNASLLAHFYVAQTGAVQDPTLPGYDPARAYHFIRPLTQYQPKKKVSKTRNLLSDMPEKDVVETEEEKKAGKIIGNYYHPNFTISLIPDAGVLSYPQMQPGPRKYVQLEATGQRDATGQHGWYYPILYTNTFWQLKKHMIELNDTVKTLPLNVNLNNLAHWKYNLMASVDENLRSQAAAAAAGQSTPGGGDGSEMEMFKEILIDSNSYLLAITAVVSVFHMIFEMLAFKNDVQHWRKKKDNVGTSVRT…
>Alen_Al4_ctg01_-_Alen_Al4_ctg01g433t1	MADTPTNTDSTSPKRPVVCVFCGASSGTSPSHMESARALAAALHASGTSLVYGGGTVGLMGEVARTLVSLSGPSSVHGIIPAPLVEFEQNSDPTNASGHAIDEAVYGRTTVVKDMHTRKQMMAREVIAGGPGGGFVALSGGYGTFEELMEVTTWNQLGIHSMPVLVFNVDGYWTGLIEWVQNAVASGFVSATNAGIIQEATSADEVVRLLREYQNAPGRFKLTWDDN
>Alen_Al4_ctg01_-_Alen_Al4_ctg01g434t1	MAAMNELESLLQSLQALKAPGVTPTKVKTITAICVENIQSDSTIIQKILQQFQNSPATHKLGVLYVVDSVTRQWVEKAKAAGQSVSRNAAPGTYAAGVQRMTEVLPAVMNDLVQHAPDNQKEKIIKLLDIWQRGQTFPLDMLAAFKQQVNGGQQSAQPAPTSPPKGNGSGPARHAQTNTQQTAAPFPSTTQKPQDPGALLAAFSGYGQQPGQTNASPPGLPFLQSMVPPPPPPGFVLPPPPAANVQPAMPPPPPAGMNDLANQILQAMSAGSIAPDQAIQVLNALAVAQNGGTSLPPAQALVAPQAQAQPQVAVQNGGPMRFEQNDMKMRDRSRSPDYTRRASPSRRSPPNRRESPVYGSYDPNAVGDGSSSSRNERGRGRGKARGGRNDRNEYRQRTP…
>Alen_Al4_ctg01_-_Alen_Al4_ctg01g435t1	MASALRLSQSALRAAAPMRSSAFTGLRCYSSKTQSLKETFAAKLPGEIEKIKKLRKEHGSTVIGEVTLDQVYGGARGIKSLVWEGSVLDSEEGIRFRGKTIPECQELLPKAPGGQEPLPEGLFWLLLTGEVPSEQQVRDLSAEWAARSDVPKFVEELIDRCPSDLHPMAQFSLAVTALEHESNFAKAYAKGMHKSQYWEHTFEDAMDLIAKLPTIAAKIFRNIYKDGKVAPVQKDKDYSYNLANQLGFADNADFVELMRLYLTIHTDHEGGNVSAHTTHLVGSALSSPYLSLAAGLNGLAGPLHGLANQEVLVWLQKMKKAIGNDLSDEAIKDYLWSTLKAGQVVPGYGHAVLRKTDPRYVSQREFAQKHLPDDPMFKLVSQVYKIAPGVLTEHGKTKN…
>Alen_Al4_ctg01_-_Alen_Al4_ctg01g436t1	MSSTPPTGVPTMADGPPRLEKKPVKFSNLLLGAGLNLFEVTTLGQPLEVVKTTMAANRSEGMSGAITRIWGRGGVTGFYQGLIPWAWIEASTKGAVLLFVASEAEYYAKSFGAPDFLAGISGGMTGGLAQAYATMGFCTCMKTVEITKHKVAAAGGKPPTTMETFMGIWRTEGLRGINRGVNAVAVRQVTNWGSRFGLSRVAETGIRRVTGKEGGEKLNVIEKITASAIGGGLSAWNQPIEVIRVELQSKTVDPNRPKNLNVASAARYIYSNNGIKGLYRGVTPRIGLGIWQTVCMVALGDVAKEAVEKLTGDKVTAKH
>Alen_Al4_ctg01_-_Alen_Al4_ctg01g437t1	MMPKHISCTATSVQPGVKRFPDRHERPQVKAWRCDLTALSRSHNFYFVACNDTIHVYQPKFPDQSIPGEPELILHPPVSSPYLQPGIDYEDSHSITRLHVDYLGQDEIILITCDDGDVIGYRTEEIQRVLDKRTESSDDEQEFQLEDPVRTFLHRNVGASAWGLAIHREARMIAISANTHKVTVLAYALATATGSPNDFSDSDSELEDCPEEEDPTDFPAPRRQDHVITLSARHNVPAVSFNNTDDDASGRWLSSSSIDGEATIWDLHQSTRSARTIQLGFCASVKDPTKAPKLSTGSCACIRPSNFPHAVWSTMFLDANTAHEEPPPQPFTLPSLRSEPYFWDVSECKTRFVLKKRKASASDVMLDGESSEMDVSDTESSVSSDNESSPLPSNDEQSQ…
>Alen_Al4_ctg01_-_Alen_Al4_ctg01g438t1	MSAVQTPSTPYARIRAVLPPPQKPKPPIQAKKKTSTPILLFSSAVAGGVEALATYPFEYAKTRVQLQTLPTCRHNPLAVLSSVVKHEGFAAIYTGCSTQVLGTAFKASVRFFSFNYFRTQLGDSNGALTPVRGVVAGSLAGLTESVVAVTPTERLKILLIDSARGPGKLYRGEIGAYQAIIRSQCIRGLYRGLVPTILKQSSTQGVKMGAYNVIREASRRHHVPQNGVTTFLTGALAGTITVYITQPCDTIKTWAQSTRGAGTIDAFRCVVRETGVRGLWSGSTSRVGRLAFSSSILYTVYEKVATALDSSFEDELFVFTPTDSAGG
>Alen_Al4_ctg01_-_Alen_Al4_ctg01g439t1	MTCNYEPIDDAVRARTSRPSKVPRREKSTEQTAAAPTPRAKSVSDDNSARSNVDAASRANSVSRIVVSSNGMPSYHGRTSTLFEENYHDRSTPEANTRMPEEWVEKGLIAEAACQRQLEDVNFRLGKLDFDGVEPELGQHLLSLHWNRQHHSFLITYRPAFMRDMACKGPNFSKLLLNAIFFSASKFSPRRELRRDADDVRTAGWQFRERVRGLLGGALDKSDITTIQALLIMTNSLFALGDERSAAWLYAGLAFRMIVDLGIHVDKAGLTTNRKFSDEDLEIRRRVFWAAFVVDKIQSLYQGRPVTIKESDTLVPIKFLDTYEELEHWTPLAYSTQSSVTYSGSPAYSISTFKNLCQLSVILSDILSTIYTERSSDKSPAELSTKLESIHSTLQAWYR…
>Alen_Al4_ctg01_-_Alen_Al4_ctg01g440t1	MPIPHPIHLHGRDFYILAQAAGATYSSSTLLNLTNPPRRDVATLPASGYLVIAFYTDNPGAWLMHCHIGWHVAEGLAVQFVERQSEISALLDTAEIKSTCAAWDKFNTSTLNIEQDDSGV
>Alen_Al4_ctg01_-_Alen_Al4_ctg01g441t1	MRPLPTLVCLVAGTAAIPALKSSHPGNTISNSKSKLSDDSITSLHLTSGSDKKAVLSPESSLYQAIEFYQASGLYQGVSIYKALKLYQANHFHQIHEAYKFLQIIDIYKVTNVHKTINIYKAIIHHPIIHPNQTIHLFQALDTHIHKLHQATHLPFPTTINNHQTFEHHAFPNLNSTNVSKVHAIDNSHGFDYIFTATTLVHASQPLTIARGIHNNTLFGQQRSRPHSVGDTVKIHVTNRLTDNGTTMHWHGVRQNGTVQADGVPSIIQCPDALEPQPGTTHTYTWRATQYGTSWYHSHYALQAWTGVFGAIVIHGPATANYDVDVGPVMVTDWSHSTVDALWTSAQTKGPPTLDTALINGMGTFNGTGERFEMVFEAGKKHRLRFVNSAIDTAFKLSL…
>Alen_Al4_ctg01_-_Alen_Al4_ctg01g442t1	MQLSRSLFFAFLACADTVISVSTSFSLYAYGSGITAGRKLFYADGYAYVGNSAPSFASQAVNVTFSLTDDSRLVASAVENATWTSQSLYIGSDNDDLKEVGFTSNYKNVSDGVIVTGFGLFGGYAYNDKAGSIAMYFVASPTNETGIYQIKWSASKTEISGSDVPISLRTAAPATPSG
>Alen_Al4_ctg01_-_Alen_Al4_ctg01g443t1	MITFVAFFAEDLLLYITRATPRTNAELIRILLPVLASATLLFTEYRLTVPNLATSIVAMLLAGVARGLRKLVIVHHPDVVLENVIPSSLHVIAGALVGTAWIAVFETGNQTFALDFGSIPLLVLNASASAVAVLLGNSILLPLHGEVADTYPQTIDVPVDRILDALTLTLLVGIVGCYSTLLTARSYTNIYQFGCFLLAITCIGSIAYVRASNRRAQNSWSTSSTYELMSSPSAISAEDGDNISLTEQAHRSAVTAMKSSSPNATFSKYLFGVSIGALWALYGILNFTERQEHRSPVLLDQKYVPQLPVEIVLSMYNEPLDEVRKLVNQLQSMPALSDAHVTIYIKDSKADNTYIKQQTGAHNVTTLANVGREGETFLNHIINRWDDLARQTIFLQAGI…
>Alen_Al4_ctg01_-_Alen_Al4_ctg01g444t1	MKFLAVAAVLAIPALAMPEALGARDNVKLNQYSSMSDCKNDKDILYHAAPVSGRCYNIDGKTGAFFINTAGFLASKLYTGTGCNGNTLGVTGGSCIERGQWNSFKLG
>Alen_Al4_ctg01_-_Alen_Al4_ctg01g445t1	MSGSPIYPQTLAERTIRLITVEPGGPESPVQCTLQEVHLDTAPIPYYALSYCWGAAHSLVKIICNSQPLWITPNLHSFLLEYRSRATNMPIWVDAICINQGNTSERTSQVRMMKQIYSEAKCVVVWLGEAAATDRVALELLKTINAPWATFYDKSVGKLPLFTGQDTSGHDATVAALVPDFCFDALAAFLLRPYFSRIWIVQELLSASDLIIWCGADTLNEEFPVLEASARLLQMWNCNIKTQIATTALEDKKAQGVGRLKLGCPGHLETLKFAREVGLSGILRLLFATRCFDATDPRDKIFALVGLASDVDEDFVDYSRSYEGVIKELSNMLLDGRIETESGCALDLWSSITREEEDDLMGPSWVVDWLKLKDSLYTPMMTQYPSEKPVIQRIPAIEF…
>Alen_Al4_ctg01_-_Alen_Al4_ctg01g446t1	MSSKRLFSWQKRQSNAEPYYKTGGLLSIDALAGESSNGPEAKVRTNGEMADGELAMRNNVVLHGGTIVTVGRGMRREAAGCFDVVAVYSLTCCKDTQNARRRPSRLTIIPLEPQEPTLSPLSSPHNARRVSSTSNLMAIFNDMLRSPSFGAAAFPRSASVHKPLPTRPRSSSMPSTPDLPVELPGSLLQQNQGFPYFETPDFVLSRPTSQNVRRGTHPPDRCAGDEGDVLDLLHLFPEPLNHSRSVPSLKSGYQESAMKSSRSGTAPNASAITKPNSHRVYHRKALSDIEWRTLAESTTTNDGNVVEPSAPRHDNASYDSNTSYVESGKLSQPSPMIPEAAVSADTWERRASRRDDSGVFFAPTPTGARSKQKEDLKATVATQDQTILTLQLQFGNLRL…
>Alen_Al4_ctg01_-_Alen_Al4_ctg01g447t1	MARELSPFSQRKLLTQQLARGEVPTPPRVVLEKATGKAPEPTKKNLSATSGRRSRSRSREKKPRDRSRDRRPKDASPAASASRRGRGGSPEPYRRRRGESQDKKHDSSRDYPRDRSTDRRRDRSRDRRRHRSVEKQHDPSKDRRRDRSRDKGADKDQKRDRSRDRHGRRYRSRSRDRRHADKPRESKRSRSRSPLAIRERKHHTPSPSASRSPPPKRRRRSRSKSRSRSPHQRNKKALPDQEVSFRGVDNSAQPPSKYGGAPVNKEKPNFKTTGALAKHANRVEGTKISLKYHEPPEARKPPPSQPWRIFVFKGDDVMDTIEIWQKSCWLLGRSHEVVDYVLEHPSSSGQHAVIQFRYIQKVVEDEFGVKSTKGRVKPYVIDLESSNGTELNGKDVEAS…
>Alen_Al4_ctg01_-_Alen_Al4_ctg01g448t1	MFRMRRYRVFLVFAVITVFALYKFGTSGATWREAASSAAGRLEGAAEDAVQYIHKPNIVAQETRKFEVDVPAATKKIPLQTPPPPAAPLDSPAGRKSSAAPASSPAVTPKLPQQQLPTVPNPALNQPHGNPANAFQPESMSVEPVYWSKLPENFPVPSQSMMKLPAGKSKPIKRIQFDFKPEAPEARAERTAKLDAIRNVFKKSWKGYRELAWEHDELKPVSGEFKDPFAGWRATLVDALDTLWIMGLKEEFADAVKAVSTIDFTTTSRADIPLFETTIRYLGGLLAAYDVSGKQYKVLLDKAVELAEVLYSAFDTPNRMPETYYYWRSQFAANAHRASSRVVLAEIGSLSMEFTRLAQLTGDDKYYDAVARITDHLEEFQNNTRLPGMWPTYLDASGC…
>Alen_Al4_ctg01_-_Alen_Al4_ctg01g449t1	MPKLPRVSVRKKHGFCLGRTMVVLRVGAQNKIYRAHEDLLCASSPLFREHIQPNRQDAEGDCSICHEELLPGICELEYCRASCGGNFHASCLDKWEEQAAPAVAKCPLCRHDLTIPPARTRLLRTVSERAFDIYIEWLYRSKILVGTVDDEDWLEDLVEAYTVGLHLEDQRFNKAILQSIVEVCVQESEYPSLYALQMAYEKTPGPCNLRDLLVGLYAESDLEHAMDGIDTCGEEMPTEFWRDLTSALIKRRADAEDYTVESLTTELLPDLFPSDE
>Alen_Al4_ctg01_-_Alen_Al4_ctg01g450t1	MRLNIVVSAFAASVAAHPQGGSLLGLPLDIGALVKSLGPAPANDPRFTNFKPAGSGDVRSPCPGLNALANHNFIPHNGKGNTIPVLIKGLAEGLNMGADFTVAIGGAGLLASPNPLGGSFDLDDLNMHNFPIEHDASMSRQDAALGNDQPFYDPNWQQYITFFNGKTVTDVPTASKAKFARYNDSLTKNPQFTYGIREAIFSYGENAIYLQAMSDPVSGMAKIEYVRSLFEKERLPYNLGWRPSKAPITLPSLGNMVVQLYGSSPQPIPEGVKILADSYKDALVAVAGGSNILANLTSGISSALGL
>Alen_Al4_ctg01_-_Alen_Al4_ctg01g451t1	MRLLKLLDDGALSLVEFTGSDIPPYAILSHTWGPDYEEVTFNDLDKGTGRNKIGYRKLTFCAKQAEQDGLQFFWVDTCCIDKSSSAELTEAINSMFQWYHKSAQCYVYMSDVALRGNVTWEQSFQRSKWFTRGWTLQELLAPKSLHFFAVEGDILGNRTSLLQAIHNVTGVSHGALQGEPLHHYSMETRFSWAERRETKREEDLAYSLLGIFGIYMPLIYGEGRRSAFARLRKEIDESLKDQTLSASSYFIPADQNEGALNRHYLSISNMEQYTLEKERLNAQQNILDSLRYSRMEERKLQINEAQTGTYGWILDPEFRTIPQSDSLLDWLSSCTESRRIYWIYGKPGSGKSTMMRFLGRNISTLDHMLPWTKNKPLLRIQHFFWNPGSELQKSIHGFL…
>Alen_Al4_ctg01_-_Alen_Al4_ctg01g452t1	MSAPSSSSRSGSHRGGSSSLSALVSTLVPCIVVAGVLVGAFLLLRVKLKRVYAPRTYHDALYEDEKTPSAGASFLGWLSKFKGLSDEYVLNHHSLDAYLYIRFLKMLTLMSFVGAIITWPVLFPVNATGGGGGTGLDILSFSNVSDSNTARYFAHAVMAWIFFGWVMFLVGREMLYLVKVRQAYLLSTWNISRISQRTVLFTDVPEKDLSLDRLHTIFPNVAQIWLVPDVSDLEDDVEDLEKSVPKLESSEIKLLSKVTKQHQKHGEKESTFDEALRPKHKLKFLTGEKVDSISHYRKHIEELLPKIRSAQLSHLSGKEKLASAVLIEFKTMAAAEKAFNDNHHRRPSDFSSRQLGVLPEEVIWKNLEMGAKNRMIRHILATVAIVALIIFWSIPVALV…
>Alen_Al4_ctg01_-_Alen_Al4_ctg01g453t1	MIFCTTLCLLAGFTIVDAVPTITAKGSKLFTSRGDQFYVRGIAYQLVPDDPLINTTQCRLDASLMQTIGTNSIRVYHVDPSADHTGCMEVFANAGIYLWLDLDTFNTQIDQRQPMWNVTQRNAFAKVMDAFHHFDNLAGFYVGNEVVWSGDGFAATPYIKAAARDMKAHRDASNYRKIPIGYSNADLESLRPTLQNYLACGNASDTLDFFSLNAYSWCGISNYQISGYEMLKQNSSEYSIPIFFSETGCNQSPPRTFQDQAAVFGEMADKWSGSIVYEWIQEANNYGLIKYGEKVDLGPSAPPDGFPRSGTPTPVQPDFDNLSNVWKTPLPTGIQQSDYTPTLSAPACPQYTAGVWEIEPASALPTLGQTHKAEKANFAQPTSAASANQRYKVHSIGTV…
>Alen_Al4_ctg01_-_Alen_Al4_ctg01g454t1	MSSDGSVRGAMPPPPGVVPNFDDPESIAHRVIIVSVLGAVMTLPICVVRLYTKQQILRNFGWDDYSIMLATIFALGFSVYVGYQTTNCLDIHIWDCPADRFYALMKIGDIAGPVLSNLATIFTKVSLGLFYLRVSPFKTSFRLAVYAVMFVSIVNGTLNALGFAWVCQPIEKYWDFSIATGKCINLNQYFLATAAINAATDLVLLVLPVFILHKLQLPLRRKIGAALLLMTGSFVCIVSLIRVEQVVQGMRVVPTDGTFGMVINFIWLLIEMWLGIVCACLPVTYTFVRTQMMSRRERSQQGAFVAVRDPNSGQILGNPPEDSGYYTGNTTVVSLEHLDVERPVQMANSEHSIREAASNKSLLETTVRCDD
>Alen_Al4_ctg01_-_Alen_Al4_ctg01g455t1	MSNLDMNDKADAIDAAPTQIYREVMRSEEFAGAAREPYGPGGFKGLFANHYVAMCATFATIGGLLFGYDQGVVSVTLVMDQFLETFPRVSETASGAGFWKGLMTAMLELGALIGALFAGYLADKLSRKYSIVVAVIVFTIGSILQTAAVEYSMLTVGRLVGGMGIGALACIAPLYISEIAPPEIRGTLLVLQEFSIVFGIVVAFWTTYGTRYMAGEWSWRLPFLIQMIPGFVLGVGIVFLPFSPRWLSSKGRDDEALQVLGKLRGLPTTDSRVYREWCEIRAEVAFTREVNREKHPNLQNGTRASNFKLELASWADCFRHGCWKRTVVGVGIMFFQQFVGINALIYYAPSLFGTLGQEYEMQLLLSGIINCTQLVGVITSLWTMDRFGRRPLLLTGAGL…
>Alen_Al4_ctg01_-_Alen_Al4_ctg01g456t1	MPPQHNLKQHLNWLLNAKPFIPPSVPLVAYSPDDSTDFNAPPEEASFYADAAINNVPAPAVQPALASTRPPPPPPPPRTLTRTKTVDIHKPPEAEGAEGDMARLRATPSNGRPRLMLAGVPPYDSTPSTSRRQQDDDNDNTYSRAPKDSRGGAAWVSAHESSSAAEPSTLRQPRVQVFDVEAIDLTGDDEVPSSPVPNHFNKGKKRKSDEYKEDLTRKRPPKPARKLPTQSPELMADEFPDIDDFVMRPDSPVPASPPPPYSTVALSKEQKQQEAIAAAEEDAGFVQWSEEEAPAAASRKRKSLSRVPSETLAPTRKLGRQTRSPSPMKFATVEPTRTPTTRRVGHAVLDSEDEDDDFGDLDVMELDLLPKSSPTKRTRKQTASRTPTKPSTQLQLPIR…
>Alen_Al4_ctg01_-_Alen_Al4_ctg01g457t1	MTPNTAPSVSILDAQTPDLIHKLSTAIASLHTSPSPADVLPSQETLSTARAALVDVLPEQGAGFEDTIRHLIQDLGPALNASSRSATYYGFVTGGSTPAASLADNLVTHYDQNVQVHLPNETLATDIEDRALTLLCSLLDFTPSQWPHRTFTTGATTSNILGLACGREYVIAEASAHRTDAEVSVGEHRIVEAMRLAGIDNIQILTTVPHSSLSKAASILGLGRSCVKCIGRTDAPHKFDMSQLQRHLSQPGAASIVAVSASEVNTGLFATSDLQEMQDIRRMCDMYGAWIHVDGAFGILARLLPSTPEYETIKHCTAGLELADSITGDGHKLLNVPYDCGFFLSRHRSLAERVFANPNAAYLAAGAAADGIMSPLNIGLENSRRFRALPVYASLVAYG…
>Alen_Al4_ctg01_-_Alen_Al4_ctg01g458t1	MRRKDSATDLRSISPAQKKSEEPMRVDLDLTVLGICTGTGLTHLSCALVRFSQKSPSALLRVQLEKFDQIPVPFSVRDPIINYLRLGPRAAKTASCIDDLFGHLFSSGVKTFCRRHTLDITCFDLVGTHTEALKLLHRQTNPDGAREHQINWNRIVTAETGISTVFDFSILEPTIVRSHIHPIAYVDRILLQHPHKFRVCLNIDELSTLSFIPAHSHDGARGTISRSCGPGSLLIDYAMRYCTSNDQSEDRDGNLASLGKVNQGIVDSFLSTRDYLRQSPPLSIATEMFGDHEAQQLIDTCLYSNMSDQDTLATITRVTAQNILNQYHRLLKIFFPAGQKVDELFICGPGARNSSIIDYLEAELPESVITKPLHDVGIPGDAHEPVCYAQLALEAVLSH…
>Alen_Al4_ctg01_-_Alen_Al4_ctg01g459t1	MSHVSSTSRKIDYQPSEASSNKSVAVDGEHDGMEIDGTEDGRSQASRSTSPSEQRRNERPVAPSDSASRSTSDPSPNDSVGIFSPGSSSSLSGPRTASSISVASLLRNPLQEGSQRYSREAVPLTQREARLVHHYSEHLGRWLDCTDATRQFTLGVPEKVKYCPVLCHAVLSFAARHQREDATADAAYQRCIALIIDRLNEPTASHDETLLCAIVILRFYEQLNVPSSTGSDAGQHLAGSSAILRASQGNHYVDPSAPTLREAAFWVYVRQCLYTATINQQPPDIDFSLQLHPTPGSMQDSHPLARLRLETAWANQMTWNTALIVNFCFEADPSMERNGRLGRWQELWDLVQKWAQERPEGFDAIWHGQASEDEHSCFPQIWFTADWHAVAFGLYHFSC…
>Alen_Al4_ctg01_-_Alen_Al4_ctg01g460t1	MASIDDTRPPPPPSPPPPPPPPPPPRAPAHMAAARAHSSTPVPTTEKADPGVDGAASTVTDAEHRAMADTLTNIYNYRKDDGYDPTKLFQRKVNKRAVPDYYDIIKEPMALSTIKARVAAKDYKSFSEFVRHLALIPHNAQVYNRQDSQAYVDALDVKKVIEAELKRLVADGTISDTVAALPYLGEIPEQDPLLPEEDEEDDDEDDEEELEMDDEDEEEDDGEGKRKRRRGPRSTAAIAKRDGGARAKEEAKNDDPESRKKRGRPPRVDTPMEARIKAIMKAIRKPRNQANKLMVSAFERVPDKAVMPEYHAEIRTPMAMDILKRKLKRKKYNSVDHFMVDVELMFENAKQYNEEDSQIYKDAVHLQRESRKVAKAEKEKPDTDFVMEEGRIPMPNGIL…
>Alen_Al4_ctg01_-_Alen_Al4_ctg01g461t1	MPVRIRLRAPNGQHTLALDDNAAVSDLLSAITTSTDLPLYDLKWGFPPQPLDPSLYGLSTLLKDTDLNLNGAQIIVIAQATGDPTEQKQDDASTSQSAAPLSLQRKEQPALKDTPEVFVPDRSGTVVLRVMPDDNSCMFRALGSAVLTDTLDSMTELRSLVAQSIQRDPEYYNDAILQRSPDDYCKWIQYADSWGGGIELSILSQEFDIEIASINVQDLRVDRFNEGRPRRCILVYSGIHYDTIAFVPYGSSTFSPENDVKLFDASDDVMLEAARQLCGELKKQKYYTDTQKFDIKCNICGWRGAGERGAVQHAEETGHVDFGEGS
>Alen_Al4_ctg01_-_Alen_Al4_ctg01g462t1	MAPTVPQSGIWVPAVTFYDAKTGRLDLVAQKKYFTYLKSTGLAGLVVLGTNAEALLLTRDERIAITVAARQAVGPDFPLMVGVSGFSVIQVQEYIDDAKKAGADYGLLLPAAYFGAATTKEVVHAFYSDVASTSPLPLVIYNFPGVSNGIDLDSPTITSLALAHPGKIVGVKLTCGSVAKITRLSASLPASDFATFAGQADFLIGGLAVGAAGCVTGFGNIFPKTVVRIYELYVAGNYEEALALHRKAALAESPVKAGVASVKFAVSRFSAVAAGIEDAEAKLAPRRPYGPVGEVAKKAILDTMEEVARIEAGL
>Alen_Al4_ctg01_-_Alen_Al4_ctg01g463t1	MQLFNIPTIALLSFSSLILEASANSGYIASCVGASLISPTGNRPYWSIVANCEKISTVFNVNTNINIDSCFGNAGGKLVAQLNGGFSGSCHSIKLSGSILSATCGNGAGGWIANSIDTNSFIGNNNGAMFCYNQNGLY
>Alen_Al4_ctg01_-_Alen_Al4_ctg01g464t1	MLPTASVSSPPSSGPPAAGFGTSTTPKPQPPVISSFSPKLFIGSEERKLTEIPLPITTREKSQPKSQHMHEDGLRASNKDSPDFFLSRFFLHVSVEHTEQKQNFYVHAELLKDRTKFFKTEPPMIHTAGFPTVELSNTRPETFAIYVSLLYTNKLRTKGPKEWHWLCRLYILAERLRDIKTKNLTIDGMILYLQETALLFSSTPVAKDGANVDATSLTWLYEHTPKNSPARRLAVDYYAQSGRAEWLLSNKSEYPPQFVFDVAVCMMQKRPCSLFATHKMSSAYYHEDAVTTDKSAATKQEVDAE
>Alen_Al4_ctg01_-_Alen_Al4_ctg01g465t1	MAQQKAPRGVEKKRKSKKRKSRTEVSSSESSSDSEVEQKKSRKSPSTEPESADSTPEPTPAPAKKEKNKSKSIPTPTSNGDVSMRDASLSPSLAPVLAPISKSKIASGKEEEEYDAIYIRKITTELADDLDKVREAQDFKANSIPMLIHALKQGESLFSVEEKRRVIATSKA
>Alen_Al4_ctg01_-_Alen_Al4_ctg01g466t1	MSTKAALKAAKSAIDTKNWEEAVEQANTVLDKDPNNYFAKLFLGRANDGLSKYDDAASAYNDATKIKPDDAQAWLGLRGMYEGLGGRNVDKNIEVGLKLAEIYANLDDAHRSQSAIDKLVDHARKHGTKTQYARALATQLPCSPIYSYLEGRLPQPSAVLMRIAEIHETQETATIKKLIDERRLRLGATLDNTTTTVKNEVYGQSPLEGIYEEIINWTNDDELRREYEEKLLERVHDTLLVLPAGQKEEKRQKVMKLAHDMVVIKHPYHLAWQIELEWRSGLDVEAY
>Alen_Al4_ctg01_-_Alen_Al4_ctg01g467t1	MASHADSAHDLLDLDIGTLRQYVELFPTEGLSKVITGYLSSGVSKYPLAQEKGDVPDLSEGGVSLSVDLPVSQDDCLALMTEGILEARKSPLAHVLLGDFYLSLEEYESAVECTRKGLKLAATEAKKTDLSFQRTRDALSSTLATALVYYQAPRNHLEAKQIFREILKRKPRFTAALIGLGLILEEDEDYKEAAEFLEQALKQDPENGRIGAEAAWCQALDGDYKAGLDKLQNYLDHPQMDASNARGRELRAQTLYRIGVCIWELDPSKAARKDRQGAYAKLLAAIKANPNYAPAYTLLGIFYEDYNKDRKRARQCFQKAFELSPSEIVAAERLARLFANQGEWDIVEAVSQRVVDSGKAKQTPGSKKKGVSWPFSALGVVQMNKQEYQQSIISFLSAL…
>Alen_Al4_ctg01_-_Alen_Al4_ctg01g468t1	MGKDHPDANLHPEATGLAAKTVQASRYENDLKLYSGWFCPFVQRVWIALEEKGIQYQYIEVNPYHKPQSLLDLNPRGLVPTLQYQGKPLYESTVLCEFLEEAYPDHTPKLLPDDPYLRARTRIWTDYVGSRIIPAYHRFLQHQGEDGLKEKQTEFLNHLKEFTSEMDPEGPFFLGKEFSLIEIVIAPWANRLWVFDHFKGGSGIPEEGQGGNFEEVWKRWRKWLSAVESRKSVKETLSDREHYLPIYGRYARDEAQSEAAKAIRAGRGIP
>Alen_Al4_ctg01_-_Alen_Al4_ctg01g469t1	MSTTVVLGAQWGDEGKGKLADILANESQLCCRAQGGNNAGHTIVANGVTYDFHILPSGLVNPNCINVIGSGCVVHVPSFFKELEALDKHGLDTKDRIYISDRAHVVFDVHQLVDGLEEVELGGGNLGTTRKGIGPAYSSKMTRSGLRMCDLFDEKVFEQKLRHVAAGYQKRFGDLLKYDVEEEIARYKDLREKVAPYVVDQVPLLASAKEKNAKILVEGANALMLDIDYGTYPFVTSSNTGLGGVITGLTLGWRSIKEVIGVVKAYTTRVGSGPFPTEQLNEFGDKLQKVGHEVGVTTGRKRRCGWLDLVVLKHSHACNDYTSLNLTKLDVLDDFEELKIATSYSHKGQKLEGFPSNPDVLAEVEVHYETLPGWKKPTTGAKSYYDLPSQAREYIEYIE…
>Alen_Al4_ctg01_-_Alen_Al4_ctg01g470t1	MFGKFILTVAAAMGVASAQTGPGFPVPATQALTVRFGNNTVSPAGELIPRPETANPPNISTPVWWASSDNEDPTPPPGVLLMVDLDVPLNNTRVQLLHWLATNVTLGPAVSTSNSTPLVIPNAPVPYLQPSPPVGDVPHSYNLVVFRQPANFSIPAQYSNLTNNRVFFNVSQFVRDAGLGQPFVGSYFQVQNLTGTPTTTYPPARSPTSTSGGNGSSPLPFSGSATSLMGDKALWVGLATALMAGFAAFAL
>Alen_Al4_ctg01_-_Alen_Al4_ctg01g471t1	MTVTRSRGAVHKVKKHKPILFGGTFVHLLIGPHNRKFSAHEDVLCSRSAYFKKRFQEVRKDIDGECAVCIDNLESVAAETVFCRTCGQNFHNKCMDQWLQTMNTCPTCRTVWKKWPNMRSSTLDQLDPEGFEVYVQWLYSHQIPSYGSDKDANARCIRMLKAHLLGNTIKDNDFLLAVRNEIVETAVEAGLEYSAIDFAYKNTLKPCSLRQFLVDLYALTGDAQSLKEGNVSHLFLIDMVQSFIGKSRNLSEGADVWSMLVAEGHIEGNSPVPKEGAEVEDGND
>Alen_Al4_ctg01_-_Alen_Al4_ctg01g472t1	MAEPAPRPSLFTPASKPAAPSAQKAKHIQYQNVTFRNWYKKINWLNTTLVVLIPLYGLYLARHTPLRLATFIWSVIYYACTGFGITGGYHRLWSHRCYSARLPLRLFLAFVGAGAIQGSIRWWSANHRAHHRWTDTMKDPYSVMRGLIFSHIGWMVLNNDPKVKGRTDVSDLDSDWVVVWQHKHYGKCLLFTAWIFPCLVAGLGWGDWWGGFVYAGIIRACFIQQATFCVNSLAHWIGEQPFDDRRSPRDHVLTALVTMGEGYHNFHHEFPSDYRNAIIWYQYDPTKWLIFAFSKLRIPLLMAPWAYDLKTFRENEIEKGRLQQQQKALDRKRANLDWGVPLAQLPVVDWDDFKARCAQGANLVAIAGVIHDVQSFIVDHPGGKALIASAIGKDATALF…
>Alen_Al4_ctg01_-_Alen_Al4_ctg01g473t1	MDAAAGSKAASLASAKVVKNAKGNIVPSSQMAHIVYGCEHMGEMFENARKQTLQHYRSILQLIHEKPSIIAQTYVDSNSQPVVSLRPLYLCLQCPNILTEEQRDQHFDTKSHCFSVESRDGNVYCGNCQDFIYDPELEMRRLLKGKKRKYEDALTADDDKLIVTNSTFLPCRATGLRGLYNMGQTCFMSVILQTIVHNPFIRNFFLSEGHKTNDCERESCVSCALDEMIVEFHSAEKTEGYGAVSMLMGSWLAGEALAGYQQQDAHEYMQFFLNTLHLTNGGTADSEDCKCVVHRTFYGKLSSTVTCDKCHNTTTALDPYMDLSLDIRNQGKKRKLMAKDSEDVALDLRDCLERFTAREKLESAQYTCRNCDSPQNAIKQLSIKRLPPVLSIHLKRFEH…
>Alen_Al4_ctg01_-_Alen_Al4_ctg01g474t1	MFRSQIARQARLFSTTPIARKSPVEAIKDAAKAVDRTISGAAVKGIEKGEQVADAVKEATPDNTSEAKGQANEALGQAKGKAAELQGEASKKAGEVQGEVNKKL
>Alen_Al4_ctg01_-_Alen_Al4_ctg01g475t1	MLKLFSAAALLGAAFAQNSSALPTVDLGYEIYRAATFNNTGGFYNFSNIRYAAPPVGDLRFAPPQAPAENRSSINTGSISRICPQAGPAWSAQATQFLTSVILGASYNTSTNYVPPGANSSSPVPAADPRESEDCLFLDVFVPEDVLAKAGKGYGAPVLVWIYGGGYTGGNKNNNPAGLIAASGNSTNGDVIYVSLNYRLGALGWQAGPSYQAEGGVSNLGLYDQRFALEWVQEYIHLFGGDKNRVTVFGESAGGGSIMHQITAYGGLKGKVPFQQAIPQSPGWQPVQSNVQLEDTYRKFLNLTNTTSLAELRALPSEVIMRANAQQVAYDTAWGQFAYGPSVDGNFVPLQPGQLLAQGRFDKDVNVMVGHNANEGPLFTAPSIQSDAALRRQLNTAYP…
>Alen_Al4_ctg01_-_Alen_Al4_ctg01g476t1	MAVAPSPSAEASALAPPPRFVVPGPATVAQIERENKARDVQDSEGRAHSPVAGSTPTPSRLTPNRLLRTSLSADSSTSTSASASASTPTPTPTSLKKSLDLFRPSPPPHSPSRSLSARSSPVLARTSSHDPSPKLFRRQTSRDLRPEYQRATMSFAFSQGASAPAANVGADVPAILAEELSFKALSQGAEGPKKLKILPSPWPTDDVPPASVTLLSLAAKPGLLAAAGPDTLVLTSTDKVRKAFQEKAGEWDVISDFAPDASMPVPKLRHVAFSAEGDFLVISAEDQGGLAVFDPTQLLKQNFKPGNEIPTDKVAVRSLLPNPTPEMEHIFAAVLDNGKLCLVDVVKGASHTIREEGVVCASWSTKGKALAVGLKDGTGVLYLNDGTQKGVIPRPPGIN…
>Alen_Al4_ctg01_-_Alen_Al4_ctg01g477t1	MAGFDFSNHNRNAALHAQGVPLPKATSTGTTIVGALFDGGVVIAADTRATSGPIVADKNCEKLHYIAPHIWCAGAGTAADTEFTTAIISSNLELHALSTGRKSRVVTCMTMLKQHLFRYQGHVGAYLVIAGVDPTGAHLFTVHAHGSTDKLPYVTMGSGSLAAMSVFETQWKPNLSRDDAVKLCANAIEAGIWNDLGSGSNVDVAVITAEKTTLMRNYITPNTRQPKQRNYRFQKGTTAVLNEKIITKEDISKYVTVSELNDDDVTATAETMDVDT
>Alen_Al4_ctg01_-_Alen_Al4_ctg01g478t1	MNMPNSSTAPAAGEYAGDEVSAIVLDPGYSTTRAGFAGEDVPKSVCPSFYGQSDSDSYLFGENAIHSPVGNLDIKNYWGADGIVEDWDAATKLWEYAITSRLTGAKAGDPAKNGLNDDPRANGEAMDVEMEGVENNEKPMEDSPLLVTEPGWNSAKAREKYIEIAMEDWGAPAFFLQKTGVLAAFASGKASGIIIDVGASHTSVTPVLDGMVLRKGVQKSTLAGNFISQQIRQTFKTATPEIPLTPHYLVKTKSPVDAGAPANATYKTFPVAPSPSFRLNEEERILTEFKESVVEVWPGPGRFTNGTNEELAKSLPGRTFEMPDGWNNVFGSSRFRVAESLFDASASLTSDTLPRPKDEATIPRLVQAAVSHVDADQRPLLLANIVVTGGSTLLHKFTD…
>Alen_Al4_ctg01_-_Alen_Al4_ctg01g479t1	MALSYLRQLYSLDTLDTRFVVPATAPPKEALQEAQIDPANPIPVPHGKDKRNDADYAQQPRWRTPEFYFYYVVISASVFFMFKLVIDCSKAESHPNFSKFSHLLSDGWIPGRKVDNTDAQYSGFRQNVPYLFLVVTLHPLLRKAYDAFWRADTYTQVRPSNGGLTMGLTPAAAADARLSQRLSFDRGFAIVFLAALHGFSMFKILAILYLNYQIAMKLPRAYVPAVTWVFNLAILFANELSGGYHYSTIFGFFLPSTLSEKGTPARNFGHTLDSYGGLIPRWDVLFNFTVLRLISFNLDYYWSLNTRSGSPLEKKQLDPSNLSERDRVSIPAKPQDFTFRNYFAYTMYSPLYLAGPILTFNDYIAQARYRPHSITRKRTTMYAIRFIIVLLTMEIIIHY…
>Alen_Al4_ctg01_-_Alen_Al4_ctg01g480t1	MGISGLLPLLKSIHKPCNLKRFAGQTIGVDAYGWLHRGTAACAIDLALDKPTTKYIDFCMHRVRMLIHFGITPYLIFDGDNLPSKAGTEKDRRERRKEGKRLGLELLKVGKTSQAQLELQKAVDVTPEMARAFIEELKASNVQYVVAPYEADSQMVYLERKGIIDGILSEDSDLLVFGAKCLITKLDKYGDCIEVNRNHFTACREISLVGWSDADFRRMAILSGCDYLPGIGGLGLKTAHRMLRKHKTVDRLIKAAQFDGKLKVPAGFMADFDQAEKTFLYQWVFCPIQKRLVNLTPLADDVNIADMPYLGEEVAAHLAAGVASGDLYPRTKLPMTVVSKATPRNRTFGASRTVATNIQTPDLKGVKSIDSFFKPKRTPLAELDPNIFTPSPSQQVLLE…
>Alen_Al4_ctg01_-_Alen_Al4_ctg01g481t1	MVSDRLSKVHKAIAKKKGKNPNLHEGSRDTQRLQRASARDDKLNRLSRLREKENRHFLMRVKSFQSYTAEHTSPLSIKELQAMIEDYLGRDDEELAKLKAERRTGRPPSTRQTLLEQARATEQDEYASGFWIPDLEDEGVLQKLKQWDGKWASLPTLKFARISKEGFKKVSSFPPKGMS
>Alen_Al4_ctg01_-_Alen_Al4_ctg01g482t1	MDTVIKLQSTPQKPSGLHVYSTTIYVSAMSLAEKLTKLLTDLSVMTWDFGLFLANLLLPAHPPNKVIATGVPGHAGKWPEYTPPREGDSRSACPMINAMANHGILPHDGKNITFRDLNTTVRQTFNFAPSFCFFVPNFSANFLGRSYWTGTFDLHELSKHNAIEHDASLTRRDVALEPNQGVPDLQLVEELLGAATGKGKDGEVLLTKKDLSRQLAKRRNEARAENPKYSESLFHNMFGSANSSTMLTIFGGRIDDLRTMLTEERFSENWEPRIRSRYGLTMAAFNATVLPVELGVLRKTKEQ
>Alen_Al4_ctg01_-_Alen_Al4_ctg01g483t1	MSSIQITPVAHPANSRRNLGAVATNLDVNNLTEEDWKIIHDGLYTHSVLVLKNQAHATPKAQFELTQRFDSSSSGYGHGKTLDAKRSILHPDLKTIPHQPQVQVIGNGFVKDFEGLKDITLKHPHHKTFHKTAISEAEDLDFTRFYRWHIDAALYDLQPPRVTSLMAVQVPKGRTQTLRYDDGTGDELQVPLGTTAFVSGYTMYDILSESDKEFARTTKVEYAAHPYIWMSSAKSRSTGLGLESDGMELPASELPPVDESKILKLPMCWKNPVTRQLALQVHPSAVRKLHLKDGSVIDDLKEVRDIVYRLQRPGIAPELVYCHDWEEGDLVLFNNQGTIHSVVGAFAPDEVRIFRQCNLASSAPPEGPEGGASEEAWTKPLRTYEPTGSAQAVEQAWMK…
>Alen_Al4_ctg01_-_Alen_Al4_ctg01g484t1	MANLKFAVSMQRIIPFLGFHHVLMILIAIAVILLSLLLAGCSSTSPLIPGIFLISLWYEKYTPAYSTEQVDPGVTQAIANIVGNAQLGVRVGYFGICINRDGGGYICSNNATALVDNLSVDQDPLNLVWVAATFKDAVIFPYLLIVAIILAFFTFVLLATFPGWHEERDERTGSDVDVKPFPSRPVSQVALALIFISSIFVLVSVLWQHTASVAAATIAQDLGNGSVKSGVGTSAMVLGWFGFVLLIIVTIGLLVMIISIVVLDRLTDD
>Alen_Al4_ctg01_-_Alen_Al4_ctg01g485t1	MSNYALPKSHQDLMEKSLVDTDNEVAQIMEREIQRQRESILLIASENVTSRAVFDALGSPMSNKYSEGYPGARYYGGNEHIDAIELLCQKRALEAFGLDNEKWGVNVQCLSGSPANLQVYQAIMRPHERLMGLDLPHGGHLSHGYQTPQRKISAVSTYFETFPYRVNLETGLIDYDQLEQNALMYRPKVLVAGTSAYCREIDYARMREIADKVGCYLMMDMAHISGLVAAGVNKSPFPYCDIVTTTTHKSLRGPRGAMIFFRKGVRKTDAKSGKDILYDLEGPINFSVFPGHQGGPHNHTITALAVALKQAQTEDFKLYQQQVIKNAKQLETTFKELDFKLVTDGTDNHMVLIDLKPWNLDGARVEAVLEQVNIACNKNTTPGDKSALTPMGIRIGAPA…
>Alen_Al4_ctg01_-_Alen_Al4_ctg01g486t1	MAWRSSGSSNQALIDNLEKNGLIETKRVKDAMLQVDRAHYAPKNPYDDRPQPIGHQATISAPHMHANACESLLDYLEPGAKVLDIGSGSGYLTAVLANLVGPSGKVVGIDHIQPLVDMANANMAKSEEGRKMLESGQVKFVTGDGRKGWKEDAPYDVIHVGAAAAEHHKELTDQLKAPGRLFVPVSDGWSQNIYVINKKEDGSIDQICCMGCSTCL
>Alen_Al4_ctg01_-_Alen_Al4_ctg01g487t1	MAPPATKRRKLEQSEDESEGSFAGFDSADSNIGDEANGGDSDISMEGPAGGEDVSDDEDAEESVAQKSKKSAPAASAIPAQKPQKRPAATLQDGAYTSESFKSNMFKLQVDELLEQVKPKYGKKEAPAENAMRTLKTIIEQIPSRDASPISEAEKALKSVGIAVPFPSPPPPKDAKYKLQYERPSSINATGSYPLKTATKSDEGMAIDLVVTMPKSLFQDKDYLNHRYFYKRAYYLACLAAGIKGAKKHKFELSFESWHGNQLQPIIVVRPSGNGDADDFSSSKARINIIPALPENTFAPNKLLPTSNAVRPKGSEEETASKALPPTPLYNSTLQSDANVTAYLKLLYATATKADAFKDACILGRIWLKQRGFGSQLRKGGFGNFEWAALVALLLQPNQ…
>Alen_Al4_ctg01_-_Alen_Al4_ctg01g488t1	MASLRSIGVHKPAALQYLVTESILSDDCTERDYVWDTYADENPEGPTDEVVTTEYHVVWSRGGIVRKVFNFAIEKEKVIQALLTWFPVEEPSGASTQGFGRVAEYSTHEQSRTFLTQGTQPATDPSALAEDASNILETRARALVVFLRSQAHVFFLSGTTHIVNLPFEVDRVFSAARGVVVQRRIAPIIHVPSSPQVPMAPPNSFLTNTQSFLSQGLSQSFTQAHRRNNSSLATTHGTKAHQNGSALFLDNLLKSSAAPNTEGLPRLFSFTDPLSELGLVVKRSSLLTKSGSDHQKPSQVVNKAEEVLYVSPHNEVLFDRSGNDKPLLLVVTANYETNVFTIWSAAYLEPKSISASRKHHTPMPLSKSRRRSSHGATSTGTGATTPAIRGGDRLRDSFG…
>Alen_Al4_ctg01_-_Alen_Al4_ctg01g489t1	MQPIATTKGKLTQLRYELPQRVHDATIYPVKAPNGSTILLYGHETGVSVIWRGGRPLKKAVPPPKQAPKPQKVNGVNNDAIMIIDSDDDEPAKDAQAPSAPQAEFEDEEEELDPDQPYPSVIQQLRLSFNAEVLHIAVPRVPAVSTLRPADSLPAIFSKKLVFTATCADSTIRVVTLPLSPPPHSTKEKPLSASSQYGEEIIKFHGHQSIARGVTMTWTSRAEPSAKYETDDEMDMDAEGDVGATPGRRRRKQQGRSRSRPSTAAGFDILIATHSAELGGLFKIWRFELTETSVNGAHPIAPYKAVTLRKPASRIAFNTAQYPKRRHSQLLITDLTGTARVYDPFAPASRKRSASGHTEPGAFITMFKSTFESMKTNSHTPPILATRKAILDAAWTSDG…
>Alen_Al4_ctg01_-_Alen_Al4_ctg01g490t1	MPHTTVTSSSPDARLKDKTGSDATGNSMQRATCTRSAAIQTSLSSPLEATKASATARALFNLSRGYTEQQEWVGSLSSTLGREGASAKGKKGCREGKERRSQGEKEEERKGPWDIVTS
>Alen_Al4_ctg01_-_Alen_Al4_ctg01g491t1	MSSTIAKQYSRLLRLWPTDALRPNLPFTRAIEARALPYGVHPVNRPEDSSKSPKSTSPVPSKADVPPTTAETHAQPANPQLETAQITALYSLLEDRYANKYALTDAVFKPTSAPEHYSKLMHEIERAPQKTWWQAKVDEWKMKIRWQ
>Alen_Al4_ctg01_-_Alen_Al4_ctg01g492t1	MEAPGRATALGHETTDTPTCLRRLTDLLASSHCHCHCTCTCTCTRTRTRTCTRTQRSLLRFTPSLLTTCYPRRSTAAAEIPPSCRAKATKGCAASARRNRHARIANGLLTALQVAANDDADSPVTSLSAQQWPPASPPPSFHSRASSPTSRRLLSDDPLTQPQDRTLADTFDSDSDDDEDEDGRDDRQRLMRGNPHSDDDAPPPPGLQRRVTELPTFNTQAPASGRVYGGGNGGVWANLSAKPTRGEDVEEKPPTYEQAAADATPPYWETTILAPGTFGDEVFVEGLPVGSLFSFIWNAMISMSFQLVGFLLTYLLHTTHAAKNGSRAGLGITLVQFGFGFRSATLNPGGSSNDNPNQGFDGGIPSDPNAHDFNPDDVSSSAGGADAAASASASVTGSD…
>Alen_Al4_ctg01_-_Alen_Al4_ctg01g493t1	MYRYTAGTPCPAPSNASYSSNRYYDYGHPSSVYAPSYVEDGTTANIEYTTELQAKPRNVKPRRPVRAARPTAFNPGLDIFEDVAHEEEQQQHHAAADTRRRSRATAMPDGARVKKSSLLAQPAQKIPRAAPSVQEPQVLRSQRKRVSQVLMDRQSPNVNATLKLREDVLERKELKKQGPKKDPRRRTIYVPSDDTTYLTIHPGQSTHQSRNARETSPDIGLDLVTVSDEDNTSLVSALKKEKKTSRKALAAPPKRGPLSTSLRSLQSVSFSSDVAGSGDGKENVPPGMATIEKNSTGTHIEINFPKALTKTTSVVDAPKARIKSSKTSDVTSSARSEVRSRAKSDIRTRPEGSQKRVREQVSFERIPAKSIKARADGTASTASSLAAHKATLKEHNAAI…
>Alen_Al4_ctg01_-_Alen_Al4_ctg01g494t1	MFPTFDVPPQHAETVGARKHRKAKEEETARRSSTATSQSSGSNRSVRAESSASSNKKGGGFGWFGKSKGVQEIPKVPSLKNKISEPSPPPPPPPPPAPAAIAAPDAAPSPLQETPSPVVSSLTSELAPQTSDRRPSQRSNPDLQYQHQQRFHVPPPLQSLPPPPTSALPQLPSPGLSSRGRIDTGRPLHDADRVKSTYSTLSHNSYSTTTTSSARTGFSNQSIFSNPPRRHDDVLSEDSCYGDDHSPLSKTPSPMTPPTFVDNRKPPPIRQHSDPAYANNVQMEPVEPRSGSRMSDGPTKAAQGPFARALGKMESAGARIVSARLSEEWEGLDDDDESLQEVVFEKRLWALTAYQRLTQNKQLQSPAHDVLANSRPANQRRVLHLHGNLADGWVLATRY…
>Alen_Al4_ctg01_-_Alen_Al4_ctg01g495t1	MAVDDRRRQPVRRAEDDSETGPAPARRTGGVAQTSSMCQDRREKRIFGGSTTFTHFFHRPPTQQHQRRRQLGTFALGPSFLARLAATFQKNIGQCL
>Alen_Al4_ctg01_-_Alen_Al4_ctg01g496t1	MGFAALKARTNDIVSGSVVGRYFHLEGSGHPNEIKGARFTTELRAGLTTFFTMAYIIAVNASVLTDSGATCVCNDTVDPTCLKDRDYNLCLVEVNRDLVTATAAIAALGSFLMGISSNLPVAVAPAMGLNAYLAYQIVGFHGTGPINYRVAMMAVFVEGFIFIALSLLGIRQWLARIIPASIKVACGAGIGLFLTLIGLSYSAGIGAITGSKATPLELGGCPTQYLDPDTGACLSHKATSPTMWLGFMVGGVLTALLMTYKVRGAMIVGIALVSIFSWPRDTSITYFPRTEIGDSRFEFFKNVVAFHPIQRILAVQDWTLSTIEGDVAGQFILAVFTMLYVDILDATGTLYSMARFSGVVDPDTGDFPKSTIAYCADAVAISIGSLFGSSPVTAFVESG…
>Alen_Al4_ctg01_-_Alen_Al4_ctg01g497t1	MHLSLLSLISVAASGAVAEKLLYRNTFNSSAAISSWVAEGPVTANVANNTLTLGGAGKIDDYFVYWLPEIFPDQIRISWDFQPVQEPGLAMFFFGATSVSGGSIFDPSLKPRNGSYPQYHSSDIRLLHASYFRRRWPEERAFHVANLRKSPGFNLVAQGADPIPDVADTQGAYYNITVVKDKREASFYINGLEIFKFDDTNTNTGPLVREGRIAFRGMQPLIARYRNLEVWSL
>Alen_Al4_ctg01_-_Alen_Al4_ctg01g498t1	MVKIPLDERSVYLAFKNVFKGPDVQPQSDKSIRKKIRKYQSANEEIQALIQGHTVLQIGKIVKTLLEGNVFASTLEAKIRFPEIFDVSSAQSAERAVSEAEAAKSEADAIREVTARQQEGSASAAIVGEATVKKDKEKLAGMFLTKTDFGNLTSEVVSAPPPNEKPLLPENFKARSLYPLYLPAKSQRQLLSKVQDDLEHACFRFGQRKMVRELQKQAWDSPECVELNIWMGLFRSKGNLFDAERMAGLGKPFPDLLSSIAQIRHTAVHRLRVTTGRTELFLADAEALAVLLADESCARQLSRLRRETHLIVEEFGRNKDFLESQYMDKRKEIAARRAELDRIEQAAWDTMLEEDKQYQSFAGANLEEIIDMPETTLHSAAASEAGDTSEEDTSVESES…
>Alen_Al4_ctg01_-_Alen_Al4_ctg01g499t1	MAANDPGLAPLSAPAEDPIKGAVDVPIDTETPVAPDQFDPKYETTRKEIWAYYSYYVGDNGLTLFNFGPTAFQNLMYQAAGDSEILHFMGRDRTINSIVLLCNGISFAIQIVVFLILGSFADFGTWRPNILIVLSIIAFGIGFGWLGVHTEQDWHIGVGLYIVGLIAYQTTITFWTAAFPGLARNTKTLRIKADEFADGRITRAEYDFADMMERNKLSNTAFYVQSVFEIAILAVIVGIMFGLHVNDSEANNNWGLSVLIAFATGVWILCAIPWFVLEKRRPGQDPGRTNIILAGFKQLGYAMSQIWQLRQSLAYLVGYFLLGDSLNTTVTVIGTLQNEIVAYNSLQLTYLLIVGIAAQAVGIGAFWQIQKRYGLSTKTMFMVVAVCIVLLDGWGMIGI…
>Alen_Al4_ctg01_-_Alen_Al4_ctg01g500t1	MWKEEMQPVSTKEYNGSVNTRTQFGEHHKGYSFDMAANSYYNGNIPMAHEQEQHLLAHSVPPSGHQSNQSPPLKPLHLVPQTNYQHGQASFEKFEDLQHAQQEDAHLKARIRRFRMLSRVLSFVISIGVLAPITMTLTKFLHTQNVYHNVSHSDGTTVSRTAWAKDSKVWPTYSYFGVAAISVILNFSTIFSYRFGISKANSFSYITSMFSWAVMLGNLVVWSVAAGVYRSEKDKHGKSNDLWGWTCSPGARAIQKEFAGEIDFNRFCNVQSASWYVGLVQVAASLLTVVVYVLVFRRRESKRRVQRLSVLAQ
>Alen_Al4_ctg01_-_Alen_Al4_ctg01g501t1	MGASQSTGGGAPEGQGGGDVKTSYYELLSVERTATQDELKKAYRRKALELHPDRNYGDVERTTALFADVQHAYQVLSDEQERAWYDAHEGDILRGGTGEGAGEDQYQGNMKVTTPEDITRMMGRFRSNIDYTDAPSGFFGFVRETFEQLAKEEEYAADYEDINIPNYPTFGHKDDDYEGVVRDFYAAWDGFASAKSFAWLDVYRLSDAPDRYTRRLAEKENKKHRDDGRREFNDAVRTLVAFVRKRDPRYTPDTRSAEDKAKAQRELRKTQAARARAELNAKLEREAQELPSWATERPASELEESEEEIVEEHFECVACNKTFKSERQYEAHEKSKKHQKALKDLKRKMQKDNAHLDLDNYGVSSGIITPAEYGGDDVADLDAVPVMDANVEDITAKTT…
>Alen_Al4_ctg01_-_Alen_Al4_ctg01g502t1	MKFGHVFKQCMRNEGFPPEWVDSAISYSQLKKVINRLTDELQQVGLDPATLSKLLKHVEDYNASADQNGDQHRPFEYILNGDTAASKSSREKKLFHPKLLFYVNEKNGDVDSASIDEETKRKLQMLAVETGMTSLRVFEDADSQKSSEANPAIHASRPGYRTVEVPLTSDTEFFTQLTSEVAGLEKLQEREEKRMHAQIESLGSQIAKLTDVNKRSNKKTITAWRQVFQMYIEEGIFFGTTEQDHKSHDADKATRRLAEFSNKIARAGLVEKFKKKENMAALNMFMHINREILQGLRFGEINHNAMIKILKKFDKRTALGVKRTFPRQVEYPEFSEHLAKAVCAEVNTRILSHVPQLDDYSCPMCCEIEWRPVKLSCGHVFCIRCLIVMQNNKQHNCPY…
>Alen_Al4_ctg01_-_Alen_Al4_ctg01g503t1	MANFSKPQNMTTMLFAFFAFLHFTVALQHGSHHHHARNSADALIKRQMDEIADSLVARQSSGFTAITGVCSTSTGSDGVCNSNGRVSAPRLEIRQLKQNADQWNLYLLGMERFMAKDKNDKLSYYQVVGVHGRPYTTWNNFPTPLLNKAGFCPHAQTLFGAWHRPYLAIFEQAWYQSVQEVIKTFPSGQQSRWNQAAATLRMPYWDWAQDPGSSGATVPTLIRDQTVTVTKPSGTVTIANPLYSYSWGNSLPTEIGGGPWNNWPSTLRRPIANPTRSNNNEMNARFNSMRVSLRDRLFALFSSKQPWGAASTSQIGVRTDLSGSGVDSFESVHDAVHNTAGGETGGHMYFLDISSFDPIFWLHHTNMDRLLAMYQLIVPNTYVANGNINHPMAQWQQGE…
>Alen_Al4_ctg01_-_Alen_Al4_ctg01g504t1	MTIVPRQRSSSSLAHLAHTAHTAHTGAPEPTARRPPPAPLPTLHSSLSVPEGHLLPDSTSPRARAHTLADPSSPSSPSSPSSPSSPSSPSSPSSPSTPSTPSSMYQLPPPPRQPASAPAHNMGLPPPPPRPSTSSQMAAMNIPPPPHPNYNVAAWGPPPHQRQHQYQQPGYNPSLYQGYQQNLPPPPGPPPPHQQLEAPLTSATYIPDGESFGPGVGIPALQPNHAPRQYADPAFYRGDDGFPPNADMSGTSFLNIHDSVQSVQYGSSAPVNYPLTPNNRSHLNIPQDRAPTYDQSGPPTTTIQSHNNAYHRPDGPVSPPIHSPQWPAEHVQRWLADNGFSKDWQETFRTLGLEGSRFLDIGRGHGSKGNVAMMHQVIFPQLAKQTTASGTGWDQNRER…
>Alen_Al4_ctg01_-_Alen_Al4_ctg01g505t1	MAQDLRSQDIKNPIDVAEYLFRRLKQVGVESIHGVPGDYNLVALDYIPKNGLKWVGNCNELNAGYAADGYARVKGVSALVTTFGVGELSAVNAIAGAYSEYVPIVHIVGYPSTLSQRDGALLHHTLGNGDFTVFSRMSKEISCAVSMLNHVHEAATLIDNAVRECILQSRPVYISLPTDMVQKKVDGDRLNTPLDLDYPSNEQEREDYVVDVILKYLHAAKNPVILVDACAIRHRALKETHEFVKKSGLPTFVAPMGKGAVDETLPNFGGVYAGDGSNKGVRERVESSDLVLSIGAIKSDFNTAGFTIRQSQLNTIDFHSYGVKVRYSEYPGVRMNGVLAKVTQKLGQLNIEKGPDPNNDIPNEELKSPEPTITHAWFWPRLGQFLQKSDIIITETGTS…
>Alen_Al4_ctg01_-_Alen_Al4_ctg01g506t1	MKSIIIAGAIAAILGTASSRPLNLKRDYVTEIVYVTETFAAAVVYVDQDGQPYSTSTVEQSIATSLEAVTTSDAAPTEVPNVSPPSNPVVVSSSAAPAPLASSTALPSFSLVPSQPEPSSVQIKDEPITTAAAQSSYTPPPAPPAPTTPTPGLESSSPPPAPPSSSAVAPASSQAPQQGGNSLPIGVTYDPFTGSEGNSRCKTDAEVADEFSRMSSYKSVRIYGMGCNIIPLAVQNALKNGQTLMGGAYLSNKGNGEDLSSVITTWKSAIDQYAKGSWDVLKLFSVENERLNDHDMTASEVVDAIRRGRDQLRGVGYEGPVGAVDTVPATIDNPSICQASDVVMVNCHPFFDPNTAAEDAGPFVKSQIERVKTACNTDRVVVTETGWPHQGDANGKAVP…
>Alen_Al4_ctg01_-_Alen_Al4_ctg01g507t1	MSAAQLLNPKAESRRRGEALQVNISAGEGLQKVLASNLGPRGTLKMLVDGAGGIKLTKDGSVLLKEMQIQNPTAVMIARAATAQDDITGDGTTSAVLLIGELLKQADRYIGEGLHPRVITDGYDIAKTESLRFLDEFKLEKEVDRELLLSVARTSLSTKLDSSLAEQLTPDIVDAVLAIYQAPAKPDLHMVEIMTMQHRTAADTQLIRGLALDHGARHPDMAKRVENAYILTLNVSLEYEKSEINSGFYYSSAEQREKLVESERRFVDDKLRKIVELKKEVCGDDPKKGFVIINQKGIDPLSLDVLVKNGIFALRRAKRRNMERLQLVCGGTSQNSVDDMTPDVLGWAGTVYEHQLGEEKYTFVEDVKEPKSVTLLIKGPNSHTISQIKDAVRDGLRSV…
>Alen_Al4_ctg01_-_Alen_Al4_ctg01g508t1	MSVDYLLHESPIGYAVFKVILQPDTIGNRLAEVQKAVQDLDKFGKTVELVGLAPFQGTQDALQEINDISEGILSDFLRATLETNLPKAGKKKTITLGISESNLAGSIKAAFPNLACETAQTSEVVSDLLRGLRQHSGKLIKKLQPGDIDRSILGLGHAYSRAKVKFSVNKQDNHIIQAIATLDQVDKDLNQFCMRLRENYGWHFPELSKIVQSNDQYAKVVLTIGDKSRLTDDDTHDLAAVVDDDEAVATAIIKAARTSMGRDLSEADMEIVMAFAKRTASLAAYRRQLSNYLGSRMNQVAPNLAALIGDVVGARLISKAGSLTNLSKYPASTVQILGAEKALFRALKTKGNTPKYGLIYHSSFIGKTGAKSKGRISRFLANKCSIASRIDNFSETPTS…
>Alen_Al4_ctg01_-_Alen_Al4_ctg01g509t1	MDVNDASSPGSLSSPPHSPEGTPTSTVRVSSTGVGVGPANVSTPTPANATSPAPRGLTASGQPRKKPGPKPKLKDPAVPEPEKKTRKPRKPAEPKESSAAGPVRKRRTKASIEAQAVQPVQVVDEKPIVHNSPTPQPRPAEAVSAPQQPEHSPALTQAPRVLSNQEPTLYSNPNLSHINVAPSTPRPSSSGQRYDPIRGGIMEDKPQVPASAPPPISPPLNRASASPSITSLIDPPSASNSFFTQPVKLQQQASITSAPQSPASFHARPGPVVPSQDFSAPPPQHQQQQQPTPQPLPYTAAPTGPAPMEVDSEASKPVVASAPKVAATSNGGTPANANAPTPPTKPARQKEAPPPLPTGSGLLSGTPFGPSTTNTTSTTEAPSAPNIYLTFDLKGRQNT…
>Alen_Al4_ctg01_-_Alen_Al4_ctg01g510t1	MSVPIRTQLYLPANLAITERSRAFYDGTYEWDSDGFTDEHGVYREFDCYVPEARAPTPLPPMFPDDDSDIAQEETPNEEQAQVLETDRAAIPSPKQNGIAASILRAPEGKQSFTKPSIETRDRNIKTPQNESLTVSSNDLIAEYHDGDTVASKTGNIVTASEQVETKLSLNEDYKLSEPTLPDKKESGDFKMPYTPPKSPTNSVVGAQTTSPASTTSTLSPVPSNLSDQDKDMSTEIGDSPLASQSTASLPNTPSKRTLLSRVKVTAKTTTRGIARKVIKGGKKTSGSKSSPLKRLEDSVEDFTLLQLHSGEFLRKSGRRKSVRQAMSQDK
>Alen_Al4_ctg01_-_Alen_Al4_ctg01g511t1	MPVMLDSELLDSFVAAGVQSAASSSAAETVSNAMPSLRTIGKLALGGAQLVLGQGAVNPFQSCSNPQLSCHNTTAVENLCCFNAPGGQLLQTQFWDTHPVTGPVDSWTLHGLWPDRCDGTYDANCDSSRSYSNISAILKSFGADDTLSFMQTYWKDYQGNDESFWYHEWSKHGTCISTLEPECYTEHRPTEEVVDYFNRAVSLYKTLPSYEWLAAAGITPSSSQTYTFQAIQDALAAKRPGVEVTLGCKSGQLNEIWYHYDVRGSLQTGEFVAANPDGTKSTCPKTGIKYLPKSASQPTATSTTVGGPAPTSTSVPGAPFSGKGYLNVQVGGANKGCIISKGTWYTTGTCATFTAADLDDGFTLTSSKGKCGIVGGALTCDASVSSGTGFTAVDGSLAA…
>Alen_Al4_ctg01_-_Alen_Al4_ctg01g512t1	MALLNIALSFLILTPTFVQGQDDLGLSNGYTAFDVGSLKGEIVKGSQTLASLNSTENEFDFLPSDRLAQLAFNGAHHLGDITFRYRTSSSGAWTSVDSASARKPVTSLDHTSQDVVTAADLAPTLPSGLPIKVTREWLQYENDLAVRFNITNNGNGSVELGSLGLPVSINNIFTGRSAEETQAKCALADPYLGLDAGYVRVSHLEGTGNALVITPIAGTKFEAWRFIHEPQGNFSYQSQTFEGNYEWQVHSLAYAQNEWNSSTPWNEPTSKTLQSGEVYSVGLRFSVAENIQTIEDAVVKTGSPLAVGIPGYVVPADSITRLYINHTSPVKSIDAGGAFTISELSSSKSYKLKPVASVWGRARVTISYEDGKTQTVHYKITKTAPSALADMGHFFSTAA…
>Alen_Al4_ctg01_-_Alen_Al4_ctg01g513t1	MAIYSLFSLTSGLVKLSILLFYRRLSSRAVSPAFRWTMRVTIFVIGCYSITFVFIPVFMCQPISAFWDQVDLIKVARGYKYRCINEGADVVAHGIISTVQDLVVAFLPTLLCWNLQMPIRQKIALYGIFALGYTSVAIGAMRTYTGYRIFFQTYDVTWVASDTWLWSLLELHIGSMCANAPALKIFFTQVLKVDRITTWKRSRSRSWSYGSKKQHSSKSSGTVSQFPTPSNRTRISMWVEKVLHTSASRSYRSHTQTDNSADQSGTTLQMDAHFHPNPSPRDSMTKPLASEYMDTILDGGGCQSYMHDIEMSRLQNSQPSIDEDVQALPPLQPPMPARQMRPKLPPLSRVQEKWNIGDREYMWRPWENSNRVREDGVHSQWV
>Alen_Al4_ctg01_-_Alen_Al4_ctg01g514t1	MHTALRSCAHNDILSPSKKLVLRRFSQIVFWRATTQTPKLFEQLEHLSGAVMEMAENDNKTKAKSAQSLHAHSRSGIVESKDDSTEDGYHVKHSTSSTTWSHLQDIDRFIVNEGLANTLDQFPESIAYTFAVSDNKSYFQDRKVLFLGETDNFQAWARLKLYPLKPDEVEYLRFSFLSDTSKAERNISGLPINMYPFGLVAQQDPDLAKEELTVLVRYVFREAAGINLPFSLEAKHTFRSALITIQKAIEIAGGVYRLMNIGPPTRLPKSLSYADLSLVEQANEGAKVVKDNVLLLGDQFMDGPEAMEPESDESVSYRSSERSQTRKAFEVPTQPKVKKPDKAKKQPKPKPKPKPKSMAAVEKVVPAKRRASEAGDGDEEQYLRLRDLEQERSRIEAEK…
>Alen_Al4_ctg01_-_Alen_Al4_ctg01g515t1	MSGEALTRDAVAKHNTPEDMWCIVDHKVYDLTDFVDAHPGGSVVLEQVAGTDATTAFYNLHRQEVLEKYSDLCIGTIEGEKSEVIVTQPGELSPVPYAEPLWLRPQFKSPYFKESHRKFQKEVRKFIDKEVRPVAQECEKSGKYIPQELIDKMAENHMLAMRLGPGKHLHGKNLLGVVKGEEFDYLHDLVQAQEGVRANARGFQDGNMAGMTISLTAVLQWMPETEHKARVVNEVLTGKKKMCLAITEAFAGSDVAGLRTTATLTPDGKHYIVRGTKKWITNGMFSDYFVTGCKTDKGFSVLLIERDENLETKLIKTSYSTTAGTAFVEYNDCKVPVENLLGKEHQGFAVIMANFNHERFMMACAVIRHSRTIVEECLKWCNQRIVFGKKLVEQPAIRQ…
>Alen_Al4_ctg01_-_Alen_Al4_ctg01g516t1	MMRRSDSVSSISSMGSDAEETMHIFVKNVSGDSTIPLSIPANTSISTLRSLLALRTNLPEPADLRLVHAGKHLSSATTTLADYAIAPNATLHMALPMRGGMPPKKIRCSHKDCKDAAQRIVGDCGFCNGHFCGKHRLLEDHKCEGLEDCKKESHERNANKLNSERTMAIKGI
>Alen_Al4_ctg01_-_Alen_Al4_ctg01g517t1	MENNAPTASQSFEKDNRKDSDASLPLSTSTSSEAQSMPRSRRPSSDDDEPDWPRTWRAYACLLGCFFLMFNSWGLVNAYGTWSSYYVGHSLRTVDQLELNLIGGSQCFLVLLLSNPVGRLLDAGHFRKVIGFGTVFVPLGLFILSAVHPSSVEAIASFGPIWATQGLVVGLGMAPFFVSSSQVAATWFPKRRGLAVGYVACGASIAGVIYPTMLRYLIEAVGFNDAVRYVATLTSVTCIYSFFFATPNPAHETHKPESWFKIRTWFDTDAFHNKAWCWFTAAVAFMFFGFYPVFFNLEEWAAVRGFGTRNSSAGAQAMPEDVSNQPLQTFWLLTIMNGASTIGRLTLAQFSDKTGPLNMHIGSQLVCSLLTLILWSLAGSETDAIAFCVVFGIFSGMVI…
>Alen_Al4_ctg01_-_Alen_Al4_ctg01g518t1	MAFEVSYNLENEQQFWDELDDIVSTRCREEESIDNSLRAFLNVTTSYKSEYLDTDYSVAKCIFRVLEGELFMTHKEYVRRQMIYCLLQEEDNPTIHIVAALLLYDGRNSGDDVIFEMMHTEGSFPRLVELVQLESVQEDTRLHQMLLELLYESSRVQRLTWEDFAAVNDNFILYLLGIIEGASDDAEDPYHYPVIRVLLVMNEQYLVASTSHHKDGRPPITNRLIKALSSHGMTYKTFGCNLILLLNRESETSLQLLILKVLYLLFGNPATAEYFYTNDLHVLIDVILRNLIDLPHDSPAANALRHTYLRVLYPILTNSQISKPPHYKRDDILRLLHLLVTSGNHFAPVDETTQRLVIRCTSVPWLQPSPSRNVPRSHSTDSTTSPIDHIANGQKELAR…
>Alen_Al4_ctg01_-_Alen_Al4_ctg01g519t1	MPLLQLPIELFEVVMRIYVQDDSLKNTARARLVCRAFNNCIPEEMLHKAASSDLNALQGSREYKFYLKQHIAGILRIKLLHQDAGKCQFLRFLKDLINDTVEQEWPMDTETHRVLRSQYTQYICVALASVEYKYMRRLIVGSIVPDTQSRQDLQAVAAAAVGNVQILLNNTTKTDDMLERPREYIPSALCAAVAADQTDVVNVILKWVLATVRGPWDTGNWKDMRAAASGLLEALQVAVHTRKDTVGNTILQVLIRNRALGESLRRSAGLSLMEDCAEHGNFQIFLVAAYYYQNSGSWPKGEIPDELLFREAEDLFRRARERWPQELIYASTYDPIFAQRTQVMLSTTCRAEFHAIAKTLLGTDVLNNR
>Alen_Al4_ctg01_-_Alen_Al4_ctg01g520t1	MALPLRCARSRAAMPAQLRTIRISPFSTSTSRPAGRINHDVRITRTGKPILTVSAGRSSLGGYTATVFGATGFLGRYVVNRLARSGCTVIVPFREEMAKRHLKVAGDLGRVVFMEMDLRNTASIEESVRHSDIVYNLIGRDYPTKNFDLSDVHVEGTERIAEAVAKYDIDRYVHVSSHSAQLDSPSEFYRTKAQGEQVARSIYPETTIVRPAPMFGYEDRLLHRLASPSNVITSNWLQERFSPVHAIDVGMALEAMLHDDTTAAETFELYGPTEYTMAELNDLVEREAMKKRRHINVPKRIMKPVARYANKLLWWPIHSEDEVEREFIDQYIDPQAKTFKDLDIEPVELSSLTFEYLKGYRSSSYYDLPPMSERERREEKKYLHVIDDQ
>Alen_Al4_ctg01_-_Alen_Al4_ctg01g521t1	MAMETDTIPNLLGDARDQAPEELQEYFIAFEDYWERKLWHELTDKLIEFFEHPESAKQRIPFFETFIKSFANKINQLKLVTLGLSAATQFKDDKERLKFVNNLAESVNKPASQDAYVYATVAAASIQLRLRDEEGAQKKLDECEQILDNFDSVETVVHASFYRASAEYYKSKHEFAAYYKNALLFLACVDLADLELRERQSRAYDLSIAALVSDSIYNFGELLLHPILDSLVNTPHAWLRDLLFAFNRGDLSAYDVLSGNISKVPLLKEHQTFLYQKISLAALTETIFRRPPHDRAMTFTEISQETKVQPKEIEHLIMKALSLGLVKGQIDQVAEIARINWVQPKVLDMKQIESMRGRLKEWDASVNQLGNWIEGVGKDVWAA
>Alen_Al4_ctg01_-_Alen_Al4_ctg01g522t1	MALISSILALRRDARILKIPPYLSALCIVIGIVWLLVLPLNDYSRNTYVSENALLPGQVHTYFTGSEHNVFRAYRQEVHGMIDQSVDERSQRLGDVFRSNNLKVATQKYSYQVSNRTIANENVYAILQGPRADATEAIVLIGAWKNMDDVVNNSGVALVLTLARYFKRWSLWSKDIIFLVSGDSTTGPQAWVDAYHDGHDERYVENLKIKSGALQGAVAVDYPAGPWGHRYDKLHIQYDGINGQLPNLDLFNTAVQIASSQMNIGCAIQRMFDHRDSYKERLQTMLRGMVSQGLGHATGPHSSFIPYHVDAITLSTVGDGWHDEMSLGKTIESLFRSLNNLLEHLHQSFFFYLLIQANRFISIGTYLPSAMLIAMNFSITSIALWVASGRSTEPIPNPA…
>Alen_Al4_ctg01_-_Alen_Al4_ctg01g523t1	MASYTQLNPARLRSYVLRLPLATRLLLLAIVGLWIATIPLPWLREFARLEPAKMDLTQMHRLNLFPLMHLNFFHMIFNLVAIAPLLERFESEFGTLVTLALFTGPFGTLPGGIYTLLEKFVFRANTIVMGASVWVFLLLSAEVMKQHKTNPNFSVGPYKIPTWTTPLILVLVTSILVPNVSFIGHLCGAGIGYLWASGYIKFLVPHEKILRWVETKANLLGRLPHYVSVDQKTYGRYGVLPTASVPMGGIPRSPESGARLGP
>Alen_Al4_ctg01_-_Alen_Al4_ctg01g524t1	MQRVPRTIPRIPRPSPRTPARAFSANVILRKKQDEANGKADQLKQGSRKTTGKTSSLRSVAVEAQRSRTFVKSRGRTRFIDPDAETKTVTAYCAAETYDIASAARLVKAQGYELDPFQTGLYPQVVHVQTSDRPSEVKDFQQGDIFIFPSGTVVTWNFREREALKLVQQILPAAAGGSHLELLETEDLEYLEDGSRESSEVVGDTIILGIKPEQTSDTSSSTPIEAGPASPEVDTVLAKIAFSSGLARSTKLAVLETLLSNYQHSTREIPNMLAAKHTRSPFTRSFILRKTGELLSIRAQLNLYSELTDSMPDLFWDSRHELGLGGYYDDVGRALDVGVRIKVLNEKIGFAQEIASVLREQLSEKHGLRLEWAIIALIAVEVVLEFWRHYEERKERDDP…
>Alen_Al4_ctg01_-_Alen_Al4_ctg01g525t1	MAADPTEDEQHAVTRGEASNGTGTAQHVDDRAAEDDDGEDDDDADEEPKLKYSRLTSSLGPVYRNGDATSSFLVAGDKMIVGTHNGNIHTLTIPSFQILRTYNAHPSASVTSLSVSPLPRTQSFVNQVGSPTRAPETEAPPRKAASHAGRDPRRPQQTPVPPTPSNQIYIGSASIDGHVCVSSLVDPKDVTLRNFARPVQAVALSPDYKNDRSYLSGGLAGELILTSGGPIGTRANANTISASQAAAGWLGAIGLGGNSGRDTILHSGEGSISTIKWSLSGKYVVWVNEEGIRFMRTNLFLDSADSELAWKRIGFVGKPNRRVWQDMAALWKARVEWVDDESLESDDDAIMSMNDHRDHSKVESTLPHRRTHKQGKGSKKEKVEKLVVGWGDAAWIIHV…
>Alen_Al4_ctg01_-_Alen_Al4_ctg01g526t1	MIIRLSSLALGLLPLASALSPADIPADTPVSQLIKDASVKLASGNTQDALIYFDVAISRDPKNYLTFFRRGAAYLSLGRTQQAEHDFDKVLDLKPGFEGALLQRAKIKARKADWVAARKDYEAANKSDEIAQLEEAQGAAILAQEAAAKGDWDACIQQAGTAIVVAGGAYDIRKTRAKCRFEKGEVVEGIADLQHLLQMNKGDIEPHLQSSAMAFYSLGEPDKGLKHIAQCLQSDPDSKPCMKLRRREKNLEKNMKKLRNNFERRQFATASKLLIDRGEEDPGLLKEVKQDFQDYVEAGYIYKNSPQGLYTQLVEMTCEAYNEMNNMKKGTPYCTEALTLNPDSLHGLLNRAQRELEADNFEDAIRTLDHVQEHHQHQRIQELHQKAHTLLKRSKTKDY…
>Alen_Al4_ctg01_-_Alen_Al4_ctg01g527t1	MSQMRLRIDGRTFRDPQNREVTLHGINCAADAKLPATPDLPSHVSEKFFDGDNVSFVNRPFSLEDAGTHFARLRSWGYNTLRYIFTWEAIEHAGPGKYDEEWIDHTISVLRKAKEYGFYIFMDPHQDVWSRFSGGSGAPMWTLYACGLDPQHFAVTEASLVQNTYPEPDKFPKMIWATNYTRLACQVIFTLFFAGRDFAPKAIIDGKNIQDYLLDHYLGAIEHLAKRIHDAGDLEYDPIIGWESLNEPNKGLISYQDITVVPKEQQLKKGTTPTAWQAILTGSGRACEVETWDFGGMGPYKSGTALIDPEGRSTWLSKDYDDTHYGWKRDPGWKLGECIWAQHGVWDPTNDTVLKKDYFGIDPKNGAKIDTEYFTNHYWMAHYRSYSKMIKSIFPDSLM…
>Alen_Al4_ctg01_-_Alen_Al4_ctg01g528t1	MNAAADGAPQALQNGGGGAPQSNGHSSDFSQVLEAIQAVYAPTSSNDTRRQATEYLEQAKRDPNAPSHGYTLAADQSQLAHVRYYGLGLLEYSIKYSWDDFTAEQGAVLKDYVLELARNVTEGDQVYFRNKVAQLWTEVAKRSWGAEWLNMDEQLASLWTTSLHHQAIVLYVLETLSEEVFNREDATAGLRGSDLGRACVEIFTPLQVLQEQLPTRDKSLGVRCGDEGWLKRLCDNLSWCLGQDYQNQEAVRSSGAKTMNALRAAMPWIIPKAIAATGVIETVCKALSVPVVELQLAAVEVLQSIYSRSHLHDDDFQELVCPMFTPGSVSLLREVYNWTLSDMDINDLDDQKYTLCKKLSELANSLGLFIEQKPQNIPEGSDLAGIFGFLYDILRNPSL…
>Alen_Al4_ctg01_-_Alen_Al4_ctg01g529t1	MTCVPIVDFSAYSSKQHDSDKTKTAREIDEAFRNVGFVYLKNHGVQQEKIAECFKWSKAFFSLPTERKMQAPHPPGGSHHRGYSAPGVEKVSQHTYDANELSKAREVPDYKESFESGNMDDASQPNIWLSESALPGFRSGMEGFFKECEALVHSVLDALSTALDVPDAGLSATHAQSLFQLRILHYPPLAASELQERKRSRINAHSDFGTLTLLFQDSVGGLEIEDPHTPGQFHAVPPVEQAVLVNVGDLMSRWSNERWKSTVHRVVSPPGDEGRMLPDRYSIPFFATADPDTVIEALPGCWDAENPKKYPSVTAWEYVQMRMAALYEEAKE
>Alen_Al4_ctg01_-_Alen_Al4_ctg01g530t1	MGASFDFAPERPEHIQTILDGLDRYNPETTGTFQDYVMQQCESQTYDCYANLALLKLYQFNPHLARDETITNILVKALTVFPSPDFALGLSLLPVHALAPLSSSAHNPAAGDAPLSEAVQKLNELKNLLEGADYATFWSTLDSDDLYADLIADVSGFEELMRVRIAATVSQAVREVDQSILESWLNLSGNEFEHFVGSVCGWVVEDGKVKVPINKDNEAKGTVVRENVKFDQFARVIKRAYEQPA
>Alen_Al4_ctg01_-_Alen_Al4_ctg01g531t1	MPVSHIGLTVSHLPTSSSFFLSALQPLGYRYIGQQGHQVGFGIREADFFLCQETPGIKAGAAHIAFTATSRTAVRDFYSAALNAGGKPNGSPACRTGDDSHFNAAVLDFDGNSIEVVFTGGPDYRDDGTVISHSRVITWERTVSQSFRDDASVISSRTARSVAKAPTEVPKAPSVVSQAPSVARSISEPVAVPQAAPPAASGSDGAAKTLMGTLLGAAAGAAVAYAFVRSEQDSAKKEADFSAFMEAKNTVKAAVGHLAQASPPPQPPMQDPPPTYEPAPSVARSVKSVHRNDDAESIHSSSPSRASQAPTVRGQKQIEAAPASYYAPAPSQVSLSRSQTAEPLQIEYTPARSVAGSEARSRFSAHRSMTSPELRTIEAARSVASVSTAKPQSTAPSRA…
>Alen_Al4_ctg01_-_Alen_Al4_ctg01g532t1	MAGLLKAESSQERASSRDSPERGKKRARTQSMPPPELPKLVAEQHAPIPTNDKDSQRLIVVLCNATLETYKASHGSGRGPGGREDKYNLLNSDDHIGVMRKMGRDISEARPDITHQCLLTLLDSPINKSGKLQIYIQTARNVLIRVSPTVRIPRTFKRFAGLMVQLLHRHQIRSTSSQEKLIEVIKNPITDHLPPNCRKVTLSFDAEVVRLSDYIGSLNKNESIAVFVGAMAKGNDDFADAIKDDSIGISNFNLSASVACSKFCHAAEDVWGIF
>Alen_Al4_ctg01_-_Alen_Al4_ctg01g533t1	MAWEFLAPILTPTALRSVQADARPLLTLLLVIIGLSTFVSVCFYISFVTGKAYPKKKVEKKGGFLGFGKK
>Alen_Al4_ctg01_-_Alen_Al4_ctg01g534t1	MSAASNAALPLQGKVAIVTGASRGIGAGLAIELARRGANVTLVYTSPKSEEKAKKIASDISSLNNGSKAHVVQADLKQVEAPEKIVASTRDAFGDKIDILVNNAGVLWANPIEETTAEDYPGIFDVNVRGPLLLIKAVVPHLRKPGRIINMSSVGAHIGPSKLSLYAASKAAIEGMTKSLAHELGDAGHTVNAVAPGPVESEMLDDVPKDLVDMQLKLTAVEHRVGTTDDIARIVCWLASEDSKWVSGQTISASGGFMML
>Alen_Al4_ctg01_-_Alen_Al4_ctg01g535t1	MSYTTSLTGRERSRWPPLTRMLMSGEMSEEKGRQLTRKERFDVWMVNEGYRRLFVFTFAILHVMVFVFGMMNYGLKDNSIGTRAKFGVTFPIARSAALTLHVDVAFILFPVCRNLISMARRTPLNDIIPFDKNITFHKLVAWAIVFFSWVHTIAHWNNLAKFAAFNELGFMGFILANLATGPGWSGYVMLFALMSIAITAAEKPRRANFERFWYTHHMFIVFFVFWSIHGAFCMIQPDFAPFCDGIGVFWEYWMYGGFAYLAERIAREVRGRHKTYVSKVIHHPSNVCEIQIKKEHTTTRAGQYIFLCCPEVSIWQYHPFTLTSAPEEDYISVHVRMVGDFTRKLGKALGCNLDKKAGGEKDQNSEEVAMRQILPRVYIDGPFGSASEDVFKFEVAVLV…
>Alen_Al4_ctg01_-_Alen_Al4_ctg01g536t1	MEPHDDDAQSERESIVRSAPDVALTAADCDEATARKRGTARTTGRHHRRQAGTASSSHNMDPADDNDARVHDFLDDKLQTPADLDSLDELLANITAQHGLLRQQLDDAQRDLDDAKHRQRDHHAQLQHKATAFHRDQHDIDRRLQVITASDTSDDAVPRFEAVLSTLQRLDVAAGYLELLADVDNLSKHAQSQLQTSNDAALAPYKQLRSLHTRLTAMHHDAEGAAPQLLHHVARITHALRTKILDAFAADLDSILRKVHWPTPKAAIPPQLREAWDAAIVKLLDLHMPELEGNHYATGPADKVKLPPVLLPFEVLVQPLEMRFRYHFEGDKPTNRLDRPEYFLSHVTTLLDDYSSFVNDYMQPVLFKHFRGTDLALNPVYIDAMSAFITALLPVLRNK…
>Alen_Al4_ctg01_-_Alen_Al4_ctg01g537t1	MPTENRKRGRREEKKRKREQHDADQDAKRHKHEDHVEHILQQYDDTHQQHQHQHQQHDPQEKDPYQDEAIDGVTRPGAMPFYGMLDDDEQEYFKRADEMLELNQFADPDERAMFLASVWKEADGKELKIANSQSCSRLMERLILLSTPDQLKRLFQKFSSHFLHLVQHRFASHCCEALFIQAAPVVTQELANPDLALAPSSDPDAVIVSMENLFLLTLAELDEHLGYLMTDRFASHVLRVLVVILSGSPLEKQGKSAMQSKRKEKVGVAGADKTELALEHRAIPTSFEEALEKVIDKSVSGLDSNYLRTLSTHPLGNPTLQMLLKLELKHFGKSRAKDEKSIIHKLLPDDPIAEGTESAAFINGLVYDPIGSRLLETIIENAPGKLFKAIYSEFFKERM…
>Alen_Al4_ctg01_-_Alen_Al4_ctg01g538t1	MTESHANGSGSPAEAPLNRSEEVKDLLDAVQELIIPFIAAADRDADTKHTGHGLAIKGGAPRTALVEHHPPKKLEALLQDQLKIGDDVEKGKDRLVGLVDSILKYSVNTWDQGFMDKLYASTNAVGVVSELLLAVLNTNVHVYQVSPVLTLVEKATTKYLATLFGYSSHFCGGISQPGGSASNSSAIVIARNTLYPETKTEGNGSHKFTLFTSAHGHYSVEKAANLFGLGSKNVIGVPVDEAGRMRADELERLVKESKDRGETPFFVNATAGTTVHGSYDPYPALSKICKSHNLWLHIDGSWGGSVIFNTSLASTRLAGCELADSIAINPHKMLGAPMTCSFLLGRDMRTFHSALTLPAGYLFHNDGADVNDIYDLADLTPQCGRRADSLKMFLMLQYY…
>Alen_Al4_ctg01_-_Alen_Al4_ctg01g539t1	MLWSASQQVADTGRRLQDPEPPRDGAAGASDAFALAQPLSAFQPDLIQLTSYRLSSNDPESVQLNSLQLRPSHHHGTTNRPRLTHQAPHQAPPPPPPLLLLLPHTLALVTPKACPNKLTNPSFETGHLTPWLTILTSAWPIHNTTTTHPSSAPPHNGTYTYHAHSTSTISSSLSLSQSNIPLPVGVTVQCWAWIASSRAEGETRVDVFLDGVVCGSRVVSAGKGEEEGWVRVGGEVTVTGGVEGEGSTFVVVASSQGAGKDGWEVWVDDAGVGGC
>Alen_Al4_ctg01_-_Alen_Al4_ctg01g540t1	MEKSRSGFGVPERDRSGYRSAAAVVEKGIKRKRPSYRKAAVKLIASLRGVRTEVWDKQLSSSLSSPFFEALLRLPNELHILILSQLCISDLLALRRTCRILNVLVAGSAPSLSRYWVKHRMGNLHLRLYPITRPTEADFQYILAMRRRHIASIRLSRELANFLLGDVQEQVDPRRQQLWTSVYEKLMPLAFGVGYFLEEHRRAVLDRDLGQIRPRSHIGYDICTTGCMASQDMNTMKKMDAPLRLQCFYMYCFVLQVVRRKLRPACRTRTVGSFLRAWSNHPACSEDVAFFLILGGTGQIAKLLACPTYSDRRRYLHAYITHLSPHASKCWRCHWKDVGVVSPALLDDIPCTSIGITQLDQIWAPVMAEMMKPESRAFTTQEKTRYEELCISKKYINEV…
>Alen_Al4_ctg01_-_Alen_Al4_ctg01g541t1	MDLSVPVPVPVRMRVAAPGLANARHLTGEAHAEPDQVPYAVCRMYRGCCAALRCAALRTCDDMARRLQRRAFQRAPACRQASALVACSSSLVSPLRPGNLEGTEPNPGSQQPGALTALQPRPTCIPSNRPLANNDAPGICSLNFIDASTPSWNAPLLLFPIRVLATAILVPPSALSTLPDCHPSAPRSSPLAPRPSPLAPRPSPTIARFP
>Alen_Al4_ctg01_-_Alen_Al4_ctg01g542t1	MDFTISLAHFCEVHGPTSIICTQASTAPCASCNPCVTPPTDEPHSAYSNYGLYDQPSSLKLGRLPKLSPFETPPTSPREPSHNPYFPSFSSSDSSFGGRRPSSSFDSDSDSCENCQMVVPKKFCDKLPTGAPGSPSKDGRGRNGSPVLRSSQNYPVRGPFLGDDASSTHSSELSDTEQSKSFESNASSYPNSIPPSPLVTSRNMHTHTLTYISTNQPQSPTTYSSLKRTCMRTLSTEVLPRGNSSGAIMFGDPVAGYTIAYIFRIQDSRARGSIKHYALIAMVGRDCRKATKAMVKVTEVFQGIANRITALADKVERESRPSSAIADTPPLGTSASSMPPMFTSPRKERHFSTASSPTTRSITPVSSFLSAKRIDPDGFPRVSRDATRPKSLAEIVGQE…
>Alen_Al4_ctg01_-_Alen_Al4_ctg01g543t1	MNSNTNNAAAGQKEDYLDKGLDAAEKKYGGSMGQDTQKNRGVNEKITDGARNMLEKATGKDVPDKFSN
>Alen_Al4_ctg01_-_Alen_Al4_ctg01g544t1	MPPYDSESSDEGEDYTETNVLLGYATQDATGDAISHIGGTPNWIDDKTAPSGALAKCKVCNGLLSLLLELNGDLPDHFPGHERRLYIWSCRRKACRRKEGSVRSIRGVRVAKGASAKSNVKAEKKETKQEEAKPHPKIGESLFGVKNSANSTTPANPFSNPFSSNSNGTAPANPFASSASANPFATPTTPTAPTPTIEVTSDQKEDEASTSLPATFAQKARISTSTTTTPQPARPHEPWPAESAFPAPFPSYSLDAEYETLGTSAPEVPQNVRMMDIEGEGSGSGGGKEDKEIYESAHDATFQKFADRVGENPEQILRYEFKGKPLLYSDADAIGKALASHSENGPSSNAKVQTAGRGGAGMPRCQNCGAERVFEVQLTPHAITELEAEEMSIDGMEWG…
>Alen_Al4_ctg01_-_Alen_Al4_ctg01g545t1	MVLTVHHLGISQSERILFLCEELAIEYKIVHHTRDPIAAPQSLKSIPGNSTGKAPFIEDPEAGISLSESGAICDYILAKNAAGELGSQNLDKKLSKTYGEAGYVDFIYWYHFSNGTLQALMNRFTFFEIGQLPLDNAALLFSMHGLHETLRIVDERLKSSKWLAGEDFTVADIMSVYSLTSKRYFGPLVSFNEYPNIVRYLKDVGDRPAYQRAMEKGDPDMKLLLGAEPPEKTLIRAGGVKAEFWRKKSHI
>Alen_Al4_ctg01_-_Alen_Al4_ctg01g546t1	MKFTTAAIAASAAALVSASPCGRATNDTEIQTGDVFRIMTIRSGSDIQYGSVQAANSGFLVNAPKQNASCSEDVNYASFRLTEAGELYLNTENPPQQAYVDRSGMGQGIFQYTTGVQGASRNSERTGFTLDENSNLIFKDQTNQEIGFQACPSAATGGYSVWLSSVPNPAGYKDCLGFVARAIKEDKPVSCMYTSS
>Alen_Al4_ctg01_-_Alen_Al4_ctg01g547t1	MDFSPQQNGMYDPSSFIDPSATIANPQMNGARGFPMNSLPQKRDSNSNVLSRSQTPSQQPQFGFQQQQGFTHTPSPTMQNQNFVPGQMGQQRMQTSSPAQNPHAPQMSPMGFQGNAMNQGFNPNAGGQFPVQSVQLSQNLQERQLQAQRQYAMRLQQQAQQQQQQQQQQQQQQQQQQQQQQQQQQQQQQQMGGAMGNLAAANMAAQQRHQSGQMPRAMQHPGMQPNPMQAQQTQQAQQAQAAQQNPQVALQQFTKNVGALMAQHQRPFNPSPTAAGRVINLQNLYRIVMQFKGYRYVTQSQGWPRVAQMMQIPPQQFPSAPEELRIAYEQNLGLYEQAYVQRQNQLKGVMPGQSQMGGAMGSQMSPTRPAMPGTPQNAAQQEYLQQLQRTKEAMQQQQQ…
>Alen_Al4_ctg01_-_Alen_Al4_ctg01g548t1	MADAAVESPLNTVPPHKKQLPSSIPNFDALEGFTTEGDDDYSNFKKLQRQLEYIHLQEEYIKDEQRSLKRELVRAQEEIKRIQSVPLVIGQFMEAIDQNTGIVQSSTGSNYVVRILSTLDRELLKPSSSVALHRHSNALVDILPPEADSSIAMLGQDEKPDVTYADVGGLDMQKQEIREAVELPLTHFDLYKQIGIDPPRGVLLYGPPGTGKTMLVKAVANSTTASFIRVVGSEFVQKYLGEGPRMVRDVFRMARENSPSIIFIDEIDAIATKRFDAQTGADREVQRILLELLNQMDGFDQTSNVKVIMATNRADTLDPALLRPGRLDRKIEFPSLRDRRERRLIFSTIASKMSLSPEVDMDSLIVRNDPLSGAVIAAIMQEAGLRAVRKNRYNIIQAD…
>Alen_Al4_ctg01_-_Alen_Al4_ctg01g549t1	MPCRRVAVSQPPHAHVAHVAPTPLAAVLCPRTAPASVAAAPPAPPARFHACTHAAPTPAPTPAPTSPSTSTSPSTTATTTTTTTTTTTASPSPSPAAAPSPPSPTLAAHAPSSSPPPYAGVKAASLMSVTTVHESQMMPPYAPEPTSDAPNFSHPHPHTPKGLPHRTPSEKSLPLRERAPNGTATLPAGVQAHAHAHARPHALPNGRPAKPPSIGRRTSHDDARRSRPDMDRDTQRPSMDSRANSGELLARDDGYFASVHGSESKDMLGTTHVKLGQLSALDGTREAQRDLLPHLSSPSADPNPNAHANFNPNAHANPNHNAHANPNHNAHANPNHNAHANPNPGLRVPASSHRVSAPAAFNNDGGSTTATPSPSQHPYRLQQRHTLEVPKPSTSRPRD…
>Alen_Al4_ctg01_-_Alen_Al4_ctg01g550t1	MSLTVKSLNGDTSFLLTFSPPVAPLSSPGLFPGSFTILVDPWLVGPSIILNSIFSISHQKSQPCISHLKELEYEPDVILISQDKPDHCHEETLRQLRPDCESTILATPPAAKKIRSWKHFRPELVHALPRYVQGDDRTIHRIVLPPPTARGSCGEVTIAWMPEKRDVSKLHHAIGITYRPPCTVLSATSSSYYLDLPMSPPASPGSPMTIASSPRTIVPSPSHDREKTLSVIYSPHGVSYEIVRSYASSYLVSESALPLTALLHSFDCVDNPWYLGGNISAGSPGGVRIARDLYAKAWISAHDADKDNSGWSVRQTRVAKSTIDHITKMLEDSHAAKRRTAVRTDVVSLASGEERRIER
>Alen_Al4_ctg01_-_Alen_Al4_ctg01g551t1	MLAMPPRASLTGSFSVSDENNVVVCPLRNHDSSACRKRCTGEKRYRSMQEHIRRAHPEHYISKLPATEESFTLMVNTPPQERPPPPPLPASSAGPQGFGQGDLSAFYNDDYSSSDPRTSDEVLRRGSLLPAATAAAALASLHNHRPDFEWDSDPDAISESDSKGYRPRARFAPTALEQHITAEEPYYTSTSIHRELLPSSLARSPPARSSTLPPAPRSIKPNRPRKSSVGQNARKGKHERQKSKDHARRMSYDRKAYSAEPQTAAAILGKRWEDLIDAAASATEEDSRDLTPVPQSPFMSPHMMDNRKSLPPFMASQLQSYTASPLNNALTPPPADMSELQPFPSVELSIESAMSGQNFHIASQGLSDSSPTFPYPVQIYCAACRKLSNLRESYACSEC…
>Alen_Al4_ctg01_-_Alen_Al4_ctg01g552t1	MAILRTLTTKIKTKMSPSSSPTTSPTSPQVSSFERVSGRKDFSMERPVTQMRTDSFIEDGDVYEAPKETEKKNRRVSRFREELFE
>Alen_Al4_ctg01_-_Alen_Al4_ctg01g553t1	MSTMFGALNRFISRLDAAPQEEQQSGVGGAYGFQVLRNANQEVPLEPWFDFVIGINGRTIDNPDPALFATEVRNCAGNTISMGVFSAKGQVIREVYISIPAETPTLGLSLQWSPLAIAEDVWHILDVAPNSPADTAGLLPYGDYVIGSPEGLVRGESGLGELVDDFLNRPLRLLVYNHEYNVTRLVTITPTRSWGGEGALGCVLGFGALHRIPASLEEPPQAPGETLFSANSAPTSFDEKRPLISGVSSGEVGAGNGSELFVPANIAMPAKSPPPQGTAPPKRKQRANIATPGGGGLDDYFKEGEQKSKEDDYTPKGKGGVPPPPKAGGPPRAPPKSGTPVQGEPEVPTTEAGAEDA
>Alen_Al4_ctg01_-_Alen_Al4_ctg01g554t1	MEDAPEEDGIHQWLSVDQFPGHLQKYWFQRFKIWDKYDKGIWMTEDAWFGVTPEPIANKIAAHIAESAPKEKTVIVDAFAGVGGNAIALARSGRWERVFAIEKDPKTLKCAKHNAEIYGVANKIFWLAGDCFEAITRFAGQKNTVIFASPPWGGNYGEDDVFDLTKMEPYNLDKLYKSFTKYSKEVVLYLPRNSDLNQVARYVPEGQKLEVAHYAIMAASKALCVYFGDFNFDVAEEEEE
>Alen_Al4_ctg01_-_Alen_Al4_ctg01g555t1	MSVDQNPPAPAQGNDAEDDDLGKLLQSAQVGAATGGEDFFASLNDRELDRGEKADDAIDYEDISDDDLPEEEFTAGNSGISNTQNFSGTTLQDLGESFEDGGDDMDDLFGDGLSSPVQERAHHHEDKPLDSIEDMINGVGPHAVKLGDGKQSGSQGVTFGATQQGDDDDDDPEWLEQKALFAQAARQGKESDGPAVTKTSKEDFEKIWPNFEPDIPPRFFSLVPRNRAFYIPKVPQKQPKLMPFTKASLEIAVDQEKSFRLPSATPTTGSKRQLEEEQSGLIYITTIVEEDQDSDDQMELDDLDTFDDREKIGSVSWGDLKIACEDWDVLDEESTSDVDQLLSPPDTILGDDDVDWIRSLVPSKKRKLGSRENPVTFSVYDHMDLPSWDDPEAETAKIA…
>Alen_Al4_ctg01_-_Alen_Al4_ctg01g556t1	MGDSFTTEAFTLLGVGVAVIVLRTAARATAVGVKGFQFDDYLMCVAAIIYSLETATAYVVGAWWLGLANNGMKEEQRRTLDPESHEYSLRVGGSKTQLVGWSLYTLLLWTLKLCMCHFYSRLTSGLHHLEMRVKIGYALIGATYIATELSILLGCQPFRKNWQIYPDPGNYCQPAISKIDLYVTVILNVLTDLYLMSIPMPMLWKANIETKRKLSLIVVFGGGVFVMMAGILRCALIIKDPINGAQAAGSWACRETFVAVVIGNVPMIYPLTRRGVEKMYSMAGASKYSRNSRGNGYQHDADSLPLKSSLSKPARQGKNRSVHALPTTWNDDLGTDGWDSEVSGSIRHTKSHSRNPSAIETHEALGGIHVTRETILHSEMRKS
>Alen_Al4_ctg01_-_Alen_Al4_ctg01g557t1	MEEVDLVVVGTGWYGLAAAKAYIELHPNEEVVVLEGGPSIGGVWSHERLYPGLKSNNMLGTYEFSDFPMDTATFGVKPGEHIPGTVLHKYLTAYAKEFGIYTRTRLNTRVDYAEENIKTTNWTLKTRNTLTGEEAALQAKKLIVATGLTSEPHVPSFKGEDDFNAPIFHSKDFRERAGTLTTARNVAVLGGGKSMWDAAYAYASAGASVDMVVRKSGRGPVWMAPPYVTPLKRWLEKLVHTRFLTWLSPCIWGDEDGYGGIRRFLHGTWLGRKIVDTFWGILGSDAIDLMEFNKHPETKKLIPWQSAFWIGSGLSIRNFPTDFFEYIRNGQVRVHIADVTHLSEKTIHLSTGDSIKADALFCATGWKSRPPINFLPSGRLAELGVPYYSAKPDALMTEA…
>Alen_Al4_ctg01_-_Alen_Al4_ctg01g558t1	MILSNFHTRQQSTSADVDSSACRSLHQRRESAQYSLPSPRQPTTPIILVTEPNGPTYDVESPSEKAPKKEEPTWLNMPNKRALAILALSRLVDFWQMASLQSYMVEQLHSFDIGIPTASLSYQTGVLQGSFTFAQIVTSILWGRAADSPLVGRRTVLLIGLLGTSVSCIGVAFSRSFIEMVTWRVLGGAINGTVGAARTMVAESVDKKWHSRAFLLLPVAFNVANILGPVVGGALVHPVSTYPQIFDGAYASSLLQSFPYALPSLLCTGLLILEAGLVVAFLEETLATKRQDRSFTDQMANMYRGIVTVLLGQTTQCSGTLRTLSEKQRTNSYQTARLPFAKIWTPNVLWTLLSVAIFDLHMGAFSGLWIIFLSTPRTTPDQKSSTDALHFSGGLAFSP…
>Alen_Al4_ctg01_-_Alen_Al4_ctg01g559t1	MLSFQHLSSLCAVLSVLLGPVEAGLDNNTAPTSIFRSRPDLHAPIISFDILRPDLVAPGYIFLAPYRNTDPGPYIYDNNGQLVWSSAGTQGGSTSHNPHVCEYQGEDHICFFQGNQHHGWARGHGIIMNKSYRVVRTVEAVGAATQMDMHEFRLIDGGKRALVTIYQPRQYDLGAFGLGPGLGWIHDSLFQEIDVESGELLFEWRALDHIAPSFSYTCIDCTDTSGNGMTRDTPWDFFHINSIDKNADGDYLISARHVGAVYKISGVTGHVMWQLNGANPTFKNVNLHFSSQHHALFFKENATHTLISLFDNASNTFNITNQESRGMLIGINHVERTASKLHEWRAPEEKGLLSGSQGNMQILPSKNVFIGWGEHAYFSEHLPSGEAVMYGKLAQRESD…
>Alen_Al4_ctg01_-_Alen_Al4_ctg01g560t1	MANQPYTPKPITDIFTADTDIDRRQCKRVVPMRVLALGLGRTGTASLRSALQELGYTDTYHMMSASVENPPDCLMWQDAFAAKFDEEGEFGREQWDQLLGHCQAVCDWPAVAFAKELIEAYPEAKVLITTRDVDSWHASTLKTVDWRANDLELKFVAQWDWGAGLYQPMLHKFWSTFFKGDFKKYGKQVFTDYYAELRALVPPENLLEYKMGQGWEPLCEFLEVPVPAGKKFPHVNDTDGFVDRCKARNRAQMCNVLFRGFVMGGGLLAAVLSASATMHKLGLGSKLPSLTGFLRA
>Alen_Al4_ctg01_-_Alen_Al4_ctg01g561t1	MAKKKGKNKAKGSVKNTPKSTPKHTPRRTPSKFQPWPKDEPEKPRFSLADEARFVSGHRKSAFEAGKKLRNMPVQFVSAGLLEGTLKQRDQVSAPDSASASGDESVAPSTPSSAPPPDNTRAMAQMAIRSPSPAASEASSESSDEVLFRGRGNASAPLSTTTSRVESPLPQKQAVAVAEAVNNAVDEANAKAQSVAAQVAESASLPVDDVHVQPKINVSIRVKEPQPATAAAAAPELEVDAESDTDIIANEQFAKRRGGKPAWEGTTTPWEHKSKPGIGWLPVEDRPGTDALLSDDVNPRDAAMDDYMQNIEDFGLTGDMMAASGFARREMDLDAGSHNDWESASGSQAGDEEAGPTDSWDSDMLQDLEGMSTSSDVMDTVARILSKRNRKSGVQYLCV…
>Alen_Al4_ctg01_-_Alen_Al4_ctg01g562t1	MNDFERVGRNLVRTFYDPLPTNDSNDPIWLLGERYDPKPPPLRSTPSDAASTPRFTETPQNERGEDESWIRTSVDDTDRKEAPNGQDPAQYGGWPSSFLDDFESRTWMTYRSGFAAIQKSQDPKATATMSFRVRMQNLASPGFTSDTGFGCMIRSGQCILANALQMLTLGRDWRWQHDTTDAEHCAVLSLFADDARAPFSIHRFVQHGAAVCGKYPGEWFGPSAAARCIQDLANKHKEAGLRVYVSGDGADVYEDKLKHIAVDDDGRWQPTLILVGTRLGIDKITPVYWEALKAALQMKQSIGIAGGRPSASHYFVGTQGNTFFYLDPHSTRPLLPYHASALSSSPSPTSQDELKSDVPLTASTESQSTITDSQTTIVPSPSEGAYTPAEIATCHTRRI…
>Alen_Al4_ctg01_-_Alen_Al4_ctg01g563t1	MPPKAQKTPTTGGKAPAGKAPAEKKEAGKKTAAPSGDKKKRTKTRKETYSSYIYKVLKQVHPDTGISNRAMSILNSFVNDIFERVATEASKLAAYNKKSTISSREIQTSVRLILPGELAKHAVSEGTKAVTKYSSSAK
>Alen_Al4_ctg01_-_Alen_Al4_ctg01g564t1	MTGGKSGGKASGSKSNAQSRSSKAGLAFPVGRVHRLLRKGNYAQRVGAGAPVYLAAVLEYLAAEILELAGNAARDNKKTRIIPRHLQLAIRNDEELNKLLGHVTIAQGGVLPNIHQNLLPKKTAKPGKGPSQEL
>Alen_Al4_ctg01_-_Alen_Al4_ctg01g565t1	MSSKKQVLSLYRQSLKLALDWSVHRYLWRGQAVYLRGLFEANRNVTEPRQQRALITETENLLEKWKHPDPYRPPTAPGGSKYERNLPVHILDPPPKWMNP
>Alen_Al4_ctg01_-_Alen_Al4_ctg01g566t1	MSSQQCLRRLPSAMRASALRAGARAVARTPAARSYSAISRATSSGLLSQVSRRPAQLATQRLWTLDQTRGYADVTTVKVPEMAESITEGTLKQWSKQVGDYVEQDEEIATIETDKIDVSLNAPQAGTIKEFLVNEEDTVTVGQDVVKLEVGGEAPSGGKQEAKDEPKEPAPKEQETSSQPSGEQEQSKQQEQKQPEPAKQESKPEPPKQESKPQPPKQPEPKKESKPAPKEESKQAQPGSRGENRVKMNRMRLRIAERLKQSQNTAASLTTFNEVDMSSIMEFRKLYKDEILKNKGVKLGFMSAFSRACILAMRDVPAVNASIEGPKGGDTIVYRDYVDISVAVATEKGLVTPVVRNAESLDMVGIEKAIAELGKKARDNKLTIEDMAGGTFTISNGGV…
>Alen_Al4_ctg01_-_Alen_Al4_ctg01g567t1	MGAWGNGLFQSDNDFDTLSELGHEMGLTKLEEDMQTAAKASGKSDEEVNDIYLSIYGGGSHPDVVRKYLDSGVLVDLLKTKEAKMLSMPDGTQNQQLEYLFRDPCYGYVLLGACAMTLGCHLPESCIAMLKIVYTEGGLMPDALKQMRKALFGPDGFKDGESYDFESKSLLDTANSMNDDFDSNPSGRGFRLMNFMSPGGIFNTGMGNSTDSVIMKELRNKLHNPGCARCKDRMYCSSVCQKKHWKVHKKLCNPVKA
>Alen_Al4_ctg01_-_Alen_Al4_ctg01g568t1	MLGSASRSNAKAVYAKEPAPGPSPLQYPPSYPLFISARLGQNNSIAHSLLSAFSVVPRFQSARLSLTILVLPNCLVALPRLILTIAPPRSPTASRSPHKKALGKQACSAAPLDPAPPTTRSTKRARLTAEDVELEDKEIEEAFDDVPADDQSRVLGPAQDIEDSKQPNACSPATGYKTKWSEYEAEVDEIKAYPSAAVVLAERTAVAAKKAVVQIKTLLTVNLTLLARFTYFKANLCTRLEIPPAAGHEDFV
>Alen_Al4_ctg01_-_Alen_Al4_ctg01g569t1	MMFGKNKEAKQTSIPHDSKVVSSTHTDETHDATQPAYAASSYMRSLREGDPNDKVEVPMIHSTHKLSFGDYLPFGSAMKTGKRSVIPRSMTRDCYVKHYAKDDEGNYIGTEKPYPDCQLVFVPNKSTIEDILEQLNQFVDVRHDIRRLHSRKELKQIPN
>Alen_Al4_ctg01_-_Alen_Al4_ctg01g570t1	MAPHESIVVDASPPAYGAIAVHHHHHHHHTPARDARSSAFCRALLVAILVLFVVASFGIVTFVAWNYHEIAECEKQRLPWDKPCKDWLGNGRRDWLGRSSVA
>Alen_Al4_ctg01_-_Alen_Al4_ctg01g571t1	MPGGGAIPVTGTSDVNRVEAPVTVRAYLIVAFAAFGGIFFGYDTGWMGGVLNTSYVIKQYTGFDYPEDALGLDASAADIKTYRNEKFSIPSWQQSLTTSILSAGTFFGAIIAGDLADFIGRRMTIILGCGIFTIGGILETASTGLNVMVAGRLIAGFGVGFISAIVILYMSEIAPRKVRGAVVAGYQFCITIGILLANCVVYATQNRRDTGSYRIPIAVQFLWAIILAVGLALLPESPRYWVKKGKLDKAAHALGRVRGQPLDSEYIQDELAEIIANHEYEMAVVPQTGYLGSWMSCFEGKISNPASNKRRTILGICMQMMQQLTGINFIFYFGPVFFQQLGSISDPFLISLVTTLVNVLSTPASFVMVEKIGRRRILIWGAAGMVIMQFIVGAIGASA…
>Alen_Al4_ctg01_-_Alen_Al4_ctg01g572t1	MGMHGRGSQACVHNKAVRIVFLTASFGPDRPRSRISRAVKPTSVRSRTLADITAVTRRRVLVAKHDDAKYDLHLTAFPLKCFSTFLSPPSSLAIPNHGGPQQSRVYAVPCGASGASFRQENQQVQLQAFEKLAQDQGYYTPATETTDASHDDETMLRFLRARRFIPQEAFKQFKDTEDWRKEQNIISLFETIEVEEYEQTRQLYPQWLGRRDKRGIPLYLFEVAPLNSKNISAYEKALGKAKTTSPKVATKNLRLFALYESLTRFITPLCSMVTRPYPETPISQSNNIVDISGVGLKQFWNLKSHMQDASVLATAHYPETLDRIFIVGAPGFFPTVWGWVKRWFDPITVSKIFILSPNNVYATLAEYIDHENIPKKYGGGLDFEWTQMPNFEPEIEAAI…
>Alen_Al4_ctg01_-_Alen_Al4_ctg01g573t1	MAGPAFTQLPTEMLEAIFLHLDPRSLIALSQTNRLVQQLTAASPTLWRHLCRTSFTTWAPHHRIAAKLAGPLSDVDWRALYIRKTHIERETRRLLDHVVATQHERIRCINAMAEFGYDAKETLLRECACPDDAPDVLARRYYANAVLERIHREMAIAVWKELQDGQPVPLDRALGAYDMFARAGHDVDFDLMARDLDCLADGLFSEHPHFRRLTTRQQASTLASYLRDHGFQGVSDTAYRALRNSFIGLVLRSPSHQSLPLISVAIFCALAQRVGLDARPCGFLFHVYCLIYAPSQHTLDGDYKPSSAAPLDQMYLDPFRSSDEVHQADLLRVLWDMGVPTADHHTYLSDTTTREMVLRTARNIMNSVQTIRQTHVGVHGISSAWLDAYPDMDNAFYAT…
>Alen_Al4_ctg01_-_Alen_Al4_ctg01g574t1	MNGATPARRGPGGFPATPQQQWNRSPGARSPNASTPSRPNVRSPIQDVPRAAPPASGPVIPSDILDPAQQRFYLFAVYIALWAYRSYDFYTLAVEEDESLWLCLKWCFFDMIFMFGVPLLEIPWLEWSNSAAFLLFVLHAALDVMLMFRIGIPVQAWAVGLVGFLWDSELAISERSVKPGAILHNASLILGKQIVNILPEGSAILNPNKEPFCLNSTVTHLDIPIMINQTEPIEMELLRIDFDTNANETITIKKGELSKMLKKARKLTRSADPDDPLTLRYTVKKPGVYLLKKVLDHSKLQVRPRAASLIVATCPQARVKPTGDNRCRNDLSNVALEVEGTPPLNIKYRLSVNSKPRGGSEFHNLQPDDVISPLSRHTSQALVKHGREDVSWARAQKVT…
>Alen_Al4_ctg01_-_Alen_Al4_ctg01g575t1	MQHSKWAQADQLCLEPHLNDLDYGTDMTVCKFYSQGNCRFGDNCKFEHPGSQRDGSRGSAGGFGGRPNNSSNNNNRFGAFGGGDNYRPNQNSGGAFGSNRDSKSLPYHLDIADIRADLSGQRPIYPLSCYGPGRDAPRQLIEGLVEISPEELRVRYYAQRAAGNENVAQQEESELHAKMQQQIKAIADDIEGAVRYIEEGANVHPNRLDMIRGNSTPAGQPGASSSPFAQASGNAFSSAPSAQGSAFGQASTPGFGRPAFGQPSNPAQTTSAFGQASNPGQTNSAFAAPSALGQKPSPFGQPSAVGGGGAFGKPAFGGSGFGQASMPGSGSAFGQPSGLGQQPAFGQASAPSHTPAFGQASAPSNTPAFGQASNPAQGSAFGQANALGQTQQSTAFGKP…
>Alen_Al4_ctg01_-_Alen_Al4_ctg01g576t1	MRRRRSDELPRFADEDEARPLFAFRFRRRHVYYLCGLVLVCWWLLYPSADGASRHGVTNWTNYAYSLYATDSATLCHALLLFDALARLGSRADRVLFYPQHWDTEVTGAKDRDSQLLVLARDHYQVKLHPVKLLTVEGRTKGTIRNTQAVARAPVDPQDLIGNEAGANAAADEWTGTWDKSVTKFMAFSLAYYDRVIAMDSDVTLLKSLDELFLLPPTPMAMPRAYWADSKPWPLTSMLMVITPDLDEFERFKKTMGGGGNKELVNAHRFDMELVNERFEESALVLPHRPYALLTGEFRRHDHSAYLGNALETWDAEKVYSEAKLVHFSDWPLPKPWIMWPTEGLEEMQPDCGGSHVGSCAERKIWKHLYDDFRMRRRDICKLLSVPAPDWWTIKHGKR…
>Alen_Al4_ctg01_-_Alen_Al4_ctg01g577t1	MRDLLLASVATASLLFARHAEAVAANPLPKPSNITWGHSGCFSVASLALSAPDHQVLQQAFDRATNTITELKWIPAAVEAPIREFEPFPSSTASKKSRKKRQYGVPPTGNCTGRLSTVTVDIADTHASLQHGVDESYTLNISAGSDCVAISAETVYGALHAFTTLQQIVINDGQGNLIVEQPVSIRDQPLYPVRGIMIDSGRNFVSKKKILEQIDGMALSKLNVLHWHIVDSQSWPLEISAYPEMTEDAYSPNEVFSHATLKEIISYAAARAIRILPEIDMPGHASSGWKQIDENMVTCQDSWWSNDDWALHTAVQPNPGQLDILNNKTYEVTGKVYKEMADIFPDNWFHIGGDELFLNCNNFSSLAADFFASGKSMGDLYQYWVDRAIPNFRKQANKT…
>Alen_Al4_ctg01_-_Alen_Al4_ctg01g578t1	MPAMLDDPSAPVIVRTSGEVCYPVPGGPLPVGIAPIQVTLRDRVTLATIIPFSAPNQVPLTLLAYLCDQLGREIEKGDTYPMVEPLPLDNFGPYWFGVFGAIMLLGEIQHGRELHDMARSGCDWERECLGSFYIKPNYPGRSSHVCNGGFLVTDASRNRGVGRLMGETYLDWAPKLGYTYSVFNLVYETNLASCRIWDALGFKRIGRVKGCGNLKSYPGELVDAIIYGRDLGQDDDFVSEERFDKIRFYLKNGKYPNGADRAEKSRLRSAATHYKLTPATDDEPEKLWLKGKEVISDAQRQYEIARDVHHKSHGGINKTTAAIAELYHWVRIKETVSQVIRNCPECSEMNKGLSAMRVNQSRSSQTTNGQRQYSPPANDQHISSSAASHFSQHQATNRA…
>Alen_Al4_ctg01_-_Alen_Al4_ctg01g579t1	MPHTSTTAEPTRSSSQATSPSLLQRLGNIDLFNDLLFHREKVYQSIKRFSPVRTSASVKEENPTQFHKVEEENSRPAIWHREPKTEERDPSEDISVLSYLQNTDMAVGRPKGRQPRKAPAKAKPKGKPSLVTTRKRSGPAASKTERASKVRKTVPKANSGRRVNGRGASITDAFVISDDDDGDDVAQLRRDRRTDSLTPPDQKLKVDSPGSEDDLNPIRINDSNDSNNSNSNNSNSNNSIDLEKELLHEKAKHARELAQLHQQLDASTAATKQAQEAASSDITKLHLDHSITSSKQSADTNEMLEAERSRSSALAWECEYVRRELEAVSTRVVGEAKLIRERDAYERRCADEREVAAGLRLEVVGMEAEAAGKATAAAEERRQLVVRMEVLQQEVTRLK…
>Alen_Al4_ctg01_-_Alen_Al4_ctg01g580t1	MASTNAPASAAEAPQTNNSEPTPAAATRAETTHDPMERSISDFEDVQAFDVADADLPPLPPPEDDSFLRHDFNDDNVPSDGSDFLDRKMKRQLMDVESSFIPDLSAHPAASQTRLGADDTYLFGGSPGTVRPATQVTEDSQDAPKLDDSEGDTQHTESSILSEEPPTPAGAYKTPAARRLDVDATDDSPDNGNSFSEAAPSSPSAEAAQRRSRGQGDKDEPQTAAGTEQKELDPSQRPVSSASTVKAPDFSRFEEASSLNSASEPSLDSIAMPPPLITTTSPRAGKRPSFLQNRQSSQRSSISSITNRSDVSGDGASTASLGADYALQTGGAVPRPALPHRSSMGLSRLPSLGSIASSMSGYSDSNPWDKHRSISTNSLSGLLQPEGGLERLDEEVGSA…
>Alen_Al4_ctg01_-_Alen_Al4_ctg01g581t1	MSAKRTPVPLPGSKPRNKSKVTPPKSALSQELVGSDDDSSAESAPKAKKAEKPKATIGVHRPNEAAKPSTKDKPTPKTAPKSKSAPKKPAPKTISTQEQVEELSSSEVSDDSDAPARDIQTKLPGEVEMKDASSGSDSDSDSDSSSEDEAAKPTQKSAQPTMSKPVEVELRAAKPYTPPKGYNLVSEKDRTSSKAAKIFDNLKGKQVWHITAPAGLSLKELETIAMDKAMKGESILNHKGTDYGFSTTEKSEDGPREVLVPQKNGYSAVPARISQTLHLQQVVRLPKLSSKQADPNTGSEAAASITRSTIRAPRPQVKGLKMRYLPLGFVGGDSGGVLGDTDSEEDDVPQERAGLAAPNGLNLPTKASKRKHTETNGEEAPSKKIKKHKTPEEMKKKEE…
>Alen_Al4_ctg01_-_Alen_Al4_ctg01g582t1	MPGKRRKLEEIPPVASTQKPAARAEKPLSAIAAARLRAEATKNVTVQETTLEPLAAPSSPPAEELVSEYEASEAGPEPAVTQRNVKLCNWQHHPTDIFTENESELSINLNKNTTIALVGHFDFKVSRGAININGANVGAVTRDGQKARSYRAHVPATQPIFKIRGLDGKNHVHFTSCKEPTPFAKLNPLYESIWNTGSQGERRRTFGIITDSEDDPLQRSLQPHSSPEDWLRAIEDCASEPSMTLITGSPESGKSTFSRRLLNRYLTGMGKTKPAVPTVCYLDLDPSKAEYSPQGLISLVVVRQLNLGPSFTHPVTALPQPGSEQNEIVRSHAIPMDLANYQDYYHECIEDLYLAYKNLYSRDSSLPLLINTPAFLYTTHFQLLQQLLARFKPHNVVHL…
>Alen_Al4_ctg01_-_Alen_Al4_ctg01g583t1	MALIAARPGPGVVLDLTDAPSSPEAPPAAYKGPLYSSRPLPEYVSADDYHEGLKQIRAHLGRDCGFGIAISRTKSYTPTKTGEKRITRVMLQCARSKEYKSKGIGHKVYATRMTGCPWRAKMQPHPGGGWKITGVCMDHNHELNDVLDDKGMPPRARTTPAAQRRKPAALNEPTFTPPAPANYVPPPAHSPATTTWPTMTASGIRRAIVPMQQRLLSISRTQFPMDQPMFLVYSDHFQSILGAHADLKVALEEEFPFAYQGGVYTPAHDVLYVTSNQYSLPTGQDKVAIVSKVTRNLYGQWSRHQVPNQVRNPAGGAAYSDGVLDGVLFCAQGDMESPTGLVHMEADYPFRVRTLVNNFYGRRFNSLKDVAIHSDGSIYFTDPVYGHDQGTRPPPELPN…
>Alen_Al4_ctg01_-_Alen_Al4_ctg01g584t1	MPDQLKSSEVNSKTDPSVAKQYDNETDKVKQIQDFFSLADDKKIGILNTYRNGVGPVGRSMATARRDGPDFLFLANNHSRKFSDLESNKEVQITFQDSKTQDWISVSGTATTTSNSDPRIKEVWSRGAAAWFGDLGDGKHDGSADDPRMTLIEVKSKYVTYYKTEVGLLGYAKEVAGAAITGGVANTGVLRELSESDLEKARQMK
>Alen_Al4_ctg01_-_Alen_Al4_ctg01g585t1	MIYGGELFVVDSGKPEECYVTNGNERERILGTLAQIDRALTTSPTSDPSIPNIEFSLSLDDLPRRSKKKGVFFGYTRKEGREYDDVWMMPNYAYWSWNYTHAPSWNSIRREIELKEKEVPWNKKDPRVVWRGKIKMAKLRKELVRVSDGKPWSDIKPVVINNATDVHTKDVMNLRQFCGYKFTVQTEGTSYSGRLKYLQLCRSALVTHPLEWQEFHTHLMRLAGPDVNYIEASENFGNLEAAMDYYREHDNEAEDIARNSYETFARRYLTPAAVTCYWRRLFWTWSSVQGFEPQLYAPDKEGNQIMRATPWTAFAANWPHDPSIIP
>Alen_Al4_ctg01_-_Alen_Al4_ctg01g586t1	MSFKTYTGPSVADMIGNKTLAENVIKYHNHPTSDSILDDDNLNLLQRFVEDPSNRRRILEDEGIDPDEPMKGQQRLAAYAIWSHGREDANGGFLKESDIELLREWFEGRKAGRE
>Alen_Al4_ctg01_-_Alen_Al4_ctg01g587t1	MATNAPTLINLPPPPSDPATPSEIPGTPNSATTTMSELSTVAIKDGHRGHFPHHQQPADAERADRISRLAGLERIGVSGRTPQGLGPGSAANPPPGYFDSNNQPQMFRERSTVGSASATGSVGGRTTWASGSDGNEPDRMSEDQTEETSSVGGFSDEASLVGFGEGARTPARQLSQLGSPAVSKASAVPGYLREQAPASPLTGVSIASNAGTAQTASSTEQQRQQARTNDSMAYDENDSTNRTPGPGQSSTAQDVIRERMRQQQAGQGAMDYEQSREN
>Alen_Al4_ctg01_-_Alen_Al4_ctg01g588t1	MAKSKNSSQHNQSKKNHRNGYALTLYAERTRTHIDRASSIYYIPKRTIKKPKTHRYPSLKGTDPKFRRNHRHALHGTMRALKEVKEGKRDAA
>Alen_Al4_ctg01_-_Alen_Al4_ctg01g589t1	MATEAHCAYCFESLASSLEKRPALTLRQVETLWKKYNAGPTPTEAAAESEHDDDSPAKPAAISRLLSPASGTSSSAASTPSGVSSASSAGTSVTSLGTALQEEESAQGDHPLFVTWNTLSRSGDKRLRGCIGTFEPLELEEGLGSYALTSAFDDTRFSPITARELPTLQCAVTLLTNFEPTPNNDPLAWEIGTHGLRLSFTHHGRRYGATYLPDVAREQGWTKEEALVSLMRKAGWNGKKDDWQKVGLKVVRYQGKKVALNYKEWKEWREWVEEEMADK
>Alen_Al4_ctg01_-_Alen_Al4_ctg01g590t1	MTSRNAPMSVADLVAQAGNYTYNAHIPLANWLRTANTMQKEAQVYEAEGNDAQTYLLLYRHADLVLQHLQTHPDKTKPENRKALSAATAAVYSDLKKLEQIAPRIKRRHEEYQERRRRQLEALKALEGKGAKTLPQELDGLSVHDRASRRTSYGERPALDARNLDNHSLAARLAQREVRRRDTQRRSVRQAGVSEEEEQERRTGGVWGTWDDEYARHSRPGDDLSSQIQEVARLQRDGQRASYSQRPASRSSTSTYNYPSVPHTSAQDRWSQSDSQGPSLPARPPKEQIFRSSGTPSIPPPLPPKPSTPSHSGSPSFSQPPPVPGKYVSGPPPVPGKHTAERPPTPSNELDEFTFQPSAFLENGDPLRPVFLPAQLRSQFLSSASHNTRLNLETCGMLC…
>Alen_Al4_ctg01_-_Alen_Al4_ctg01g591t1	MHIAQGSQSYAPRSPPHRPAPRHAKLAFSLLHAAPSVCTGATATAPPTQYQRFPRLCNNVATTYHHLSAPHYQAAAGYFSSETSHKLQPSYKHYTACLPPDTHTNNMAAKFFEDLWESIFTPGPTPTLLIATNASFAALQLLFFALFLGTYSIHFVILSFLTGGLWYGINWFAKEIRIAQKAEEEAKRIRAERRGSQKDTSGDGEQADVDTGDDTEVDVKEEVQRQSEGLAKSEKKRAPRPEEQSTVFVERPNERENTPQAVPASASGGGPVGASTTGASTRLAPLVNDAVKQRKGGLGESTGDLSTDSEWDKLSEDSEER
>Alen_Al4_ctg01_-_Alen_Al4_ctg01g592t1	MSQPCGFLSDLLSCPDRQTYQTLVAPPYTCPQCNGGFADRETIEMVQGPWGCNQLIRSHVGGSHAIPGSWGNAPLVMNSGGGGRGLGMGMSMGIAANTPSMSSRAMVPVNGYGHDHRLAGLYGSRPAVCSGYGSFDNGMIMDDGFSDDHGYGYDDRRRRRHKSSSRYKYYHSSKPATNCTVM
>Alen_Al4_ctg01_-_Alen_Al4_ctg01g593t1	MRTYSRLLATATDAGAAKGPFRPAPAALLPPIPLYRTLLRTHRKVLPVEQRLLGDMYVKAEFRAHKDIDNPVQIIGFLSEWQMYAQALQGDTWKGEKMDKAKIDKMSDQQIGQLYELMQTIQKQNSEDAEVEESDTVVSLDGPKKPEQ
>Alen_Al4_ctg01_-_Alen_Al4_ctg01g594t1	MLPTPSTSHVCFDRVYEPAEDSYLLLDTLSSASESAFLQDRFKQSSTAPPLVLEVGVGSGVVLAFVAANAGSVFGRHDVLTLGTDINSFACQAASQTVVTAIKEKEHRQERTVFLDVVNGDLASAIRPHSIDVFIFNPPYVPAELPNFSRHNDYNAVPDGQTKTSFEQDSYLLELSYAGGEDGMVVTNRMLEQIPGILSAGRGVGYVLLCAQNKPDIVKQQIRDWGDGWHAETVGSSGKKAGWEKLHIVRIWKNAG
>Alen_Al4_ctg01_-_Alen_Al4_ctg01g595t1	MQQKRIDYTTTQSRDGPKAKRPRREPQPVSFPFYPKDWTVVRTFHANVSLLRSRRDCARPQLIVKKILKIESHSANDPKPFEMRVLALLPKCNRVVHALTCVASEDTNIGVALFEYYPLGDLEVWKEREFDRKNHKPVPESFIWRFFLQITQALAFIHNFIGPGREGRHPLLHRDIKPKNILVVDIGTTYTSFKLHDFGCASVWREEKQTQKSYCGTFDWQPPENPRINTTAAEIWALGACVHFLATGQKPIADTKECRAARLNRAKETPGTLEEYSSPSRYYAATAPRRVVPINLDADMQTHRGVANPESYNHQYSDELNDWMFQCLQF
>Alen_Al4_ctg01_-_Alen_Al4_ctg01g596t1	MASSTTHANHPTGHCRAQRQALEYYSTGASTIVIPETVLSEAQEYDWAACYNEVDRWHTPELESTHKQEKKDAKPVRVYKGNDESEGAKLWCLKVEKDGLCTGCGGKRIPARS
>Alen_Al4_ctg01_-_Alen_Al4_ctg01g597t1	MASFKLATTAALLFGQGIASPQAQQFARRQVGGDAPDVVIAGASSYNGLNLVPQMGWNNWNAFHCDVNESLLLTTAQDMVDYGLRDLGYNYIVLDDCWSVGRNETGYLVEDSNKFPNGIKAVADQIHDLGFKFGMYSSAGVLTCGRYPGSLGYEQKDADLWASWGVDYLKYDNCFNQGQSGTPRLSFDRYNVMSEALNATGREMIYAMCNWGNDDPFDWAYRIANSGRMSGDIYDSFNRPDDRCPCTEAIGCAWPGFHCSIMNILNKMPAITSRTMSGYFNDMDMLEIGNGGQSDSEYVVHFSMWAINSSPMLIGTNVGTLSPANLAIYSNPAIIAINQDTSAGAAKRVWRYLVDADETGEGEISLWTRSLANGDRIVALLNAGNTTRTMNATIDEVFF…
>Alen_Al4_ctg01_-_Alen_Al4_ctg01g598t1	MHNSILLALWTGVSFVLYKLIAVFLTERHHRNAAARLGCEPAFQFKLFDFQGIRNVSRIIAADKQSRVPDYMKARVDTACAEEGKTITTFYQKVLGMRSTFTVDPKNVQAVLATQFKDFGLGERRNGNFSPLLGQGIFSTDGAEWQHARNLLRPQFAREQVSDLDLEEEHIKNIMRVLPVGKDGWTDITDIQPLFFRLTIDSATEFLFGESVDSQLANLPDYTSSRPPMVVNEKDFANSFDQSQAAVTMASRMGELWWLAFDKTFRQHRDICWQFIDHYVHKALSQEKIPEKQTSSGKQKYVFLDALAESTRDPIELRSHMISILLAGRDTTASLLSFVYMLFTKHPEVYQKLRTVVLENFGTYNNPQNITFTSLKSCNYLQWVLNETLRLYPVVPLDG…
>Alen_Al4_ctg01_-_Alen_Al4_ctg01g599t1	MAPSRTMTGDTFNDEKPPQTPVSPTNTDASTLRGDAIIEIGEVPLQVSQSSPEGCQPAGDGVQPGDEKRPGFLRRVTGSFKSVPEPEHVTETRTKTLENCPNGFPRLAAFQSSDSNFGLYRSYSYLHSRILLDFQDEITELEKELDQLDWDDYDEDEDRPRFRDIATDHTEGEEEPRTRRIVLREIKARLMEYDEVLINVRRLEAFQKPSDRDYRSVRRYHTNTKPLMDAEMDSIRSKEDIVSISTGRERAAFDGGVETLIGQVDGSLKRIFNLKQPPLLNYFRTPELVAKTVNTDVSLYSASRIDKMVNIFITFVIFILLVIPIVTMYHLTSTIAIDSNTPAVTSRNTFNAVGVLIVFTLLFSAAMSVLTKAARHEMFAASAAYCAILVVFIGNFTGP…
>Alen_Al4_ctg01_-_Alen_Al4_ctg01g600t1	MASNEFEDQPAQMIEDERAEEPLEHARAKYGKGDMVHMATIANGQRVKGVFTVQAAIYNQRGWVEYQLKDTLTGQLHRHGAGVREKELKPGA
>Alen_Al4_ctg01_-_Alen_Al4_ctg01g601t1	MATDTASKQANPLGKKVIHADIQVTGIEDAPQAGEESPSTDRLLEPSSTSPEDDADKQRADNMRIWWDEAIAKNMALSEGYSHVSVLIIKWADELDELKTKAEAQELEAVFRDRFRYNTETVELNMKVKPQLQLKSRVSTFIEEHDGPNNLLIVYYTGHGVYRENEKYLQLAACVNPTQGKGFQKDAHANWDKVEEILKSDDNDADVLTILDTCYASNITKSAKQSTRKFELLSACPIDQVTAAPGPWSFTRALIDNLNELTKDYGDRPFSTFHLNQRICMDKRRLDTPSHLWYRLPNDQHILLAPLRRNSEHVQRKPEFVRAPRGYLTLQFALRDDTLNQVQIEYLTKKLSKAFENKPLIGLRRVDWLGIRPTKITSFFNRTTLAIYAITQWKKFLHK…
>Alen_Al4_ctg01_-_Alen_Al4_ctg01g602t1	MDSTIESALHRSTPHAIIEDCDDHWRICFEPDIAGIIIDEPCLIHKAIISDLYPHLLEAWEAHQEQQKTEAHRIEQKFIAFTRRFNDDSPDAFSTPHPPEPGVACDQHLLPDMGRHWGDLRQCATHPKDHAPFHGEERGYHCAMNALPKPYGYMAWVIEAAYATPSGRAIAVGRLSWSSCLYRGQRSTGMGDVGGARGRARWFNMSISV
>Alen_Al4_ctg01_-_Alen_Al4_ctg01g603t1	MSQKPASRVVNGEPSEASDGRKPASKSYVQLLRDRIALLERILRSHSIDVDAAVAQLQAEEIDSLLLEANGHNAATSQAEEICTAFEGTLSLDESINFDQDGEVRYFGPTSGRLGFQDLKDASCDNYLFPRNGSCSKGCNGRLLYSSKAHLNSTVLEVDADLQAELIDLYFTWQNPWFPVLDESLFRSNQQQDHGRFSNPLLLNCVLAAGSRFSDRLELRTDPDDAKTAGARFLEEAEILLHYDLKSPNFATIQAVSIMVMVYCSHGADAAAWLHQGTAHRLALDMGLNFDPTSVAGPTCLSVKEANLRRQIYWSLYCMDKLHATYSGRVCTMLEVQGSVKLPSYNANYATNNGSCLRSERTLALLSAHVTQSRILERVLLAFYAPQPSHTGSRREPFF…
>Alen_Al4_ctg01_-_Alen_Al4_ctg01g604t1	MSDLQYYAYEGVGVTNREKFRYNQAVRVGDRIECAGQGGWNRETGEFLLEINAQIDQAFENAEHNLRDAGGKGWSQVFRVNSYHVPINNEALAAMTRNFKKWMPDHQPIWTCVGVTRLGEDDMRVEIEVVALDPR
>Alen_Al4_ctg01_-_Alen_Al4_ctg01g605t1	MLATQHVPDPAMRHLEQELAKTMARAYDSDGQAREGFYTLTRRMEKEDEDQFDVDHTILDFLVYKATATVFEWQASANKWESDLPNALVTMTSEWRSFMSQTHQASRLSNLATFRSRLLQFALLFTHRYHPSQTWTNKESLQRLRDLNISRSQLWQNTHGCEELACVKPPLSDNELESMRERRVSALGLPSSFHLEMWSDRARPSLHEMLPLFVELTAARANLGDEWQPTSDWYDLAGQFMLQAVVDQYLIDRECQPAAMVSIFAFGSVADERKAGEGTDITAMRSLFCRDDETAEELPEWTAIRRRYIKEVAAIPTLEEIDNRYSYVKFQENMISFLEHLHDGTIKPDLIQVEEGRINIDGNELSEAESRDMIKRMRL
>Alen_Al4_ctg01_-_Alen_Al4_ctg01g606t1	MLPKKSPVLFSSYANAFTPLYHTHASPPQSCRHHMSKPQHTTPSRTYAQHAHHAHSADADLLHWPDAIRPHTTPTPYQILDCKKGDAYKKNRYYALVKLYHPDRCHPGSSAHHLPLAVRLERYRMLVAAHDILSDAEKRKAYDAWGAGWAGHHRTPTSSGHSHNPYDWEFDRKRWNTDPRSNATWEDWERWYGENHEGGEQKDRAIQMSNFTFMSLLFAFVAIGGVMQGTRFSGFHSSVVERRDQVHREASSVYQRSRHATMSGDRDERIRTFLEHREANLAGEESYHRLLPPSDNCSPNEIRRQ
>Alen_Al4_ctg01_-_Alen_Al4_ctg01g607t1	MLRARSLRWFCLTIVLLSATAFAQTSASQDDCDWYCWVEERLDTLEQQVAKLTALLYPGGSNNGNKPSYTQQPSQYATSTTSRYSTTFGKPYTTTAYNGYPTNPRPTTTTTKKVVTVSTTSQASYPTDVNPHDGYRAIGYFGNWDIYARKFFPQNIPVDKLTHVLYAFADNKDDGTVFFTDTYADTDIHYQGDSWSEAGDNAYGAVKQLQLLKQKNRNLKVMLSIGGWTYTNTNKHMDTPASTAAGRKKFADSCVAMIRDYGFDGIDIDWEYPQSATQGGQLLDLLKAIRKALDDYASTLVYEDGHGSAEQPHFELSIAAPAGQSNYKNMPLHDISQVLDFINLMAYDYAGSWDKTSGHAQNLLKSSSNPASTPYNTFDVVQAYLSAGVPASKVNLGMP…
>Alen_Al4_ctg01_-_Alen_Al4_ctg01g608t1	MTSVLRKSSVSDEKVEVINDTAGTHIDAVAEKKLLRKCDLYVLPPLFVLFLLAFLDRTNIGNARIQGLEADLDMQNNDYNIALFIFFIPYILFEVPSNLILKKLAPSTWLSLIMVLWGIATIGMGLIKNFEGLIAMRVLLGFFEAGLFPGCVYLISMYYKRYELQWRLTLFFTASIIAGAFGGLLAFAIAKMDGVAGYGGWRWIFIIEGIVTVVAGFVTKFWCTDWPETARFLTEDERALLIARLSADTGDAVMNRLDRRAARRIFSDPKIYLGVLAYFGIVNTGYAGSFFVPTIVKELGYTSSVAQVRSIPIFVVATVTAIIAAYVSDRFRNRYWLTMLGLVIASIGYIMLLAQDNLSAGVKYFALFLIVPGGYITQPIVLVWMSNLVSGHYKRSISS…
>Alen_Al4_ctg01_-_Alen_Al4_ctg01g609t1	MKLVRFLMKCQNETVTVELKNGTIVNGTITSVSPLMNVALRAVKYTPKNRDTVTLDTMTVRGSTVRYIILPDSLPLDTLLIDDAPKPKNKARKEADRGGRGGDRGRGGRGRGGGGRGRGGGRGRGRGF
>Alen_Al4_ctg01_-_Alen_Al4_ctg01g610t1	MAPALTSSAPTAPHELSKGLANNKVDKSIFPDGIRTSGQHEPLFDQLHPYEDFPKEITGPTAWSKADYQDNPERWTHVFSESEVAEISSAADAFIASGTPLTGITKEKFQLPEFSKFLEPLRKEIIDGKGFILFKGLPVIEWGNKKSAVAYMGLGTYLGYFVSQNSRGHVLGHVKDLGEDATQIDKVRIYRTNARQFFHADDSDLVGLLCIAKSLEGGESDLVSSHEVWNVLQKEHPDVAKLFTEPIWYFDRKGETSKGQKEWIRTSVFYLETGDNPRVYSKWDPYYVKSLTRFSDKGLIPALSPEQIRAATILDETCLRLALHMILDIGEIQFLSNNHVLHARTAYKDYPPPAPRRHLMRLWLSTPEDEGGWKLPFHDSKDKKRGGIQVNDTPPVAPE…
>Alen_Al4_ctg01_-_Alen_Al4_ctg01g611t1	MATATTEKKKPSAMRSILAGATAGAVEISITYPAEFAKTRSQLNRRLADGKKLPWPPFGKQWYAGCTTLIIGNSLKAGIRFVAFDMYKDMLSDAEGKISGPATVIAGFGAGATESLLAVTPFESIKTQLIDDRKAANPRMRGFLHGTRIIAQEKGIRGFFQGFWPTTARQAANSAVRFSSYTSLKQLAQSYVAPGEKLGAFSTFGLGGLAGIITVYTTMPIDTVKTRMQSIEARSAYKNSFDCVAKIFKNEGILTFWSGALPRLGRLILSGGIVFTMYEKSMEMMDKLDPQGRYI
>Alen_Al4_ctg01_-_Alen_Al4_ctg01g612t1	MLSLRNIARTAPRAARFTKAVRPQSSLFRQTAAFQPAWSQAAPRLTASFHISAIRRQESSANEELVAKLQSEISMEEGMKEDDDLSANIKEYLENSPFELEDKAGNQEVVLTRTFGDEKIRITFTTADLNNDVNSEDALEDQAMYDDADMEVQSGGANTKGAINQGNTKDGNFRVAPEDRIAPADREELEEDYENDGEGEQGFPAHASIRIERPGKGALAIEATAQDGDFLIEDLYYFPDAELADPQTAEKDWARRTLYTGPPFNNLDEDLQILLEKYLEERGINTRLALFIPDYIDHKEQKEYIRWLNNVKSFVA
>Alen_Al4_ctg01_-_Alen_Al4_ctg01g613t1	MRETTITTRSIGMAYSTESSPTRILTNLPPPYTWTGARAGELRANASDFTSTVTLYIGPKHTPFSIHTSLLTTQSPYFRAALTGPFVESTTKSITLDDVSPDHFQLLVSWLYTSSIPAPFKDGKPAYYTLLHLYGLADRLCMEGLRNAVVDLIADLADRTNSVLTPSDTRILYEGIRDSAPLRELVLDLFAFKKTDRLVEGHVDSWHAAFLRDLCVLLKRPCSQAMARHRLRMWCPESWHGARSCDNCRGVLQPRFGAVACDDCCLSFCTGCVEAGVAMAGWDDGRGKSEDGDATDTTEGARVESKGRKGRKWEACKPWRGARCALYHEHDETERCGDIFMGR
>Alen_Al4_ctg01_-_Alen_Al4_ctg01g614t1	MSASPTIAASTKRPLEEPSSPAGPNDQPDAKRPALDKMVKDESDVANDIETAQSVKGEGIATEDSKAELVKPEDDAVGVAAQNGDEHTQADTIVPDAPAILETQPIQSTSGANGRPGNGNQQVDESNWLHLRACIGTSEAATIIGKGGENVTQIRRLSGAKCTVSDYSRGAVERILTVSGQVDAVSKAFGLIVRTLNQEDLEIPSTSTSKAYPMRLLIPHILIGSIIGKAGVRIREIQEASNAKLNASDTLLPNSGERSLVVLGVADAVHIAVYYVAQTLVEQLTERFGGPAASQYATRSGMAANVVPGGMSVQPYVPQPAGGQYSQPQPNNFRRPEPQRTPQHGGYGAPHMHGQPPQQTPYGHPNMPYGAGSPGRAHYGGPAQPTPYGAHHGAAPVAH…
>Alen_Al4_ctg01_-_Alen_Al4_ctg01g615t1	MAQQEDELLQKIRQYAQDAQQLHDDPMELDASNTEARLAQTVRELQARVEEQTTALERLRAQSNVDVESAASASSDSREKLRQLLTVKDAYARLKPITPFLPGKDSALPALLAARAFQRNVQGIQEAISSTQSKINRTDTILRREEANLNDANLLSQAMEDRIERLRAQQEERSQKTPAQLARELIAAKRAQKDGYDAATQNLGEAMNDFINDYLAAMIAAEELGGPVVGDMLDVEDNTLAAGFTKQGRAKSTKKAVSDKTRQRRIDQIWGNKAAMEDDEEPPTEAEAADAEMRQLIENLFATLVGPGGGRAYYQLERDSAATRFLVRAKIAQFHPKDAKKLRLIDFGRELDD
>Alen_Al4_ctg01_-_Alen_Al4_ctg01g616t1	MPTNDQLRLPSSQAKPNEELLETFKASFPHLAQRSHSLAGPPGHTLADALDVAHPARHGDAEDIKDQDPTPRGNNEPWRFTPSLLDPNSFAFTSFANQPPGYYTPTPGGTNTLYHSQAGDLHTPGFSFGLGTPLSLPTSEGALHAGQNAPNPHLQGFNPHALGTHHHFQNTNPFGLPQQHPQSFAPHQFTHQPSAFDHASLPQAHEDSPMENVIPEVEMQSPLIGFAPQPYEDNLAGAVAPAVQPNQNFRYHVTLNAPTAMVKQSDEVPVTYLNKGQAYSISLVDTSPSQAPSSTLRYRTFIRISFEDEQQRQRPASCWQLWKEGRGTNEAHQRGGRLQAVEFVDPSQVGGGEVQGRPRVELESSSFDGFAVTWTPASNAAPECSLAVRFNFLSTDFSH…
>Alen_Al4_ctg01_-_Alen_Al4_ctg01g617t1	MDLHYAGSSHTLSNEVTSDSSFTTEPAPEEATPEEAPLAKDYIECAAFMALKELGILVARRKGLDVSCFVSGLMTLFGPGHAMKMDTGPGVHERRMQSPTSRENDKVSADDSTPRPLLRTPRSGSQRPLDQKCRRHFSFEPGDDQVQEVEAGFKTYDSLSQTDSTESESSSSSLSSSAAFRVFADGLPTNDDSIPLLSSLGTDLPRPSLIPSPVQTTGRVRRENSASSLQSIFVKNTKDDRHSSRTSIQTAFREASGANTSIKSKSRSSSSHNLRMAESPLGSKERLNSLANRHSTVALAAARVAESKSNISSQSHMRPSVVTSSSQKLHTRGQQKSENNGPRKRNNAGKSEVE
>Alen_Al4_ctg01_-_Alen_Al4_ctg01g618t1	MDVGSFYSPSTEVHRAQSDSPASGYSKTKPKARPTARFSDTRRAMVDNKGWRKKIGGKPKELPPIRTVGDETAAALPSDVPAAVDLVDRRRHGWRKTMAVSRPVTPITPAPPTPTPEDLEDTQIERTDASTPRRDSRPKPVRYTSLFTSHKEEPVGPEFAEPWSFDAPPRHDPWTYIDPITIMESIHSHLCKNYMVPVPLEYNSGLFQIFDDYRNLRSHKERQDIREQETLDDLRKVKAQWLEAEERYEAEIRRLELLIARGTTGMTGQVTVKFQTASPLTDYKAYKSTPRDCRRPQTPASKDHLHGSLPSSMPAHVTIRDRRRDQIEESSRSVLYVGLSVP
>Alen_Al4_ctg01_-_Alen_Al4_ctg01g619t1	MTEPTLTLQIPFILLGRRDTHILDPSLLPPHEQATKPITLLLQALQHFCPTIAIHPWALDTFDWQVAPPAKTTRKAKRAHAAAQAAAHDLAQHDAEEKWRALTSVGSEVWILRPAPSDSTFLSHVALQDWREGDGRLTAVEAAGLGRNVWSCPVLLQRFGVPVDTSSPAWARFVREACKVFGVLCSAFVNFQGVVDGPFRRVREARYWDLVVGRKCFLKFVVGQVDGETGHKMLILAAAFERELDTLRTTEEVVEFVGVGRWLEWMLLRKMARAQRATRRMRGEEQWQKDISVEDERYQRTKGRLREWWDVIHDMDKTEIIQGMRKFQGNGKIRLGTALHESSDHTYQFIFQGRHSTLNANQLIAYTALLARIVDTAQTLNLNALTEQLEDFQVKQLPD…
>Alen_Al4_ctg01_-_Alen_Al4_ctg01g620t1	MAAAPAHELKLDPKYDDYDYPTVAPTAQSGHPGHTTPEQDAQVFQLRTQLEQAGYTKNLDTLTLLRFLRARKFNVELAKAMWVDSEKWRATYAGVGVEELVRTFDYQEKAQVFEYYPQYYHKTDKEGRPVYIEQLGKVDLTALGKITSQERMVQNLVCEYEKMADPRLPACSRKSGYLLETSCSILDLKGVGIAKATSVYGYLQAVSAISQNHYPERLGKMYVINAPWGFSGVFSIVKKFLDPVTSAKIHVLGSGYKTELLAQVPAENLPKAFGGSCDCPGGCALSDAGPWQDSQWVKEPKWAKKSDAIDNTALPPPTTGADVPAGAQAGAPIDPAHAGVPQTQT
>Alen_Al4_ctg01_-_Alen_Al4_ctg01g621t1	MADYSVYQRGAGQTFYPQHATNIRNLPTRVRSPSTAARIPFSNPDTPSPSRSPGRQQSPQQFGMFNQQHGHQPQHVMLNGRNTHQNYAMQMNLAGKTFPHNQNHQHHAQHHQQHQDHTGGAHGGQYNHQHNISSGGMSNAQPHFGQAHLQNGTPNSVHSGLSKPPNEHWAEQLRLAQTAREMTQSHSHARIHPSVSKSVVAGTGNGLSKEPDKEERNRPAVGGAADGKGDHIWTILDFGGQNLKVITPALFNYTFLTKLYVNCNKLSYIPQSIGHLRNLTHLDMSLNNLQYLPPEIGMLVNLKQLLLFDNHLDNLPYELGSLFQLEVLGIEGNPIPDDLKQIIMEQGTSELIKHFRENSQGPEAPSERDWIVLDEIQDPTQETVTALSYNILCDKYCTT…
>Alen_Al4_ctg01_-_Alen_Al4_ctg01g622t1	MLTTASPLTSSLPVPPRAQRCRHSTHLNVNVNVIYYNKGRTWAIETIGARASSEKWVRDMMNSEWLLYRYHVPYPTRPKTAGTEGKQCEADALGRTISSSSTATSHSAMDATRGSVSSTSTQSTRDDAAASSEPFILRHGRRYLKGMQQYPLPCDLPELQRQNLHTLLATSVLGRALGSTPSPQNPPKKVLELACGSAYWTAVCHDFLSGLGYEHVSYTGLDIVPLAGDLQRQGIDWKFVQHDLRKPPLPFDDDEFDIVVMKDMSLVVPIGALSQRILDEATRVLKSGGTLEVWETDHVIRSILPHPPPPPGKSPQEHACAQTTRTFLISPITPFTEVQNKYLQDSNAWIEEAFDRRKLSPTPCARISQMLLQETETLHSVGDRRVAIPLGELRWEREL…
>Alen_Al4_ctg01_-_Alen_Al4_ctg01g623t1	MRPFTTRAALLRSSACPITPSAQRARIPVPRPPHCRFSSTEAPATEKLSPRWLSDVRARIGKCILFGINDAQTSEAGSILQEVSSDWRELLAGSEGFLTGQEYRGLYRQEVVCGEMDSMGHVNNVMYNRYAESARVNWTLNFAAQDPTHKKEWLELVSPKSIGLILRSIKTDYKFPMKWPDRITVLHKLRNKPEQDTDHFILDVLILSEAHRRAAARCIEDIVVYDYRSAKKSPLPAFMVDKFKQTFDLQEQAKEKNGARVKVLLDRVRELEKSSWDRADAVEDLGSAGKP
>Alen_Al4_ctg01_-_Alen_Al4_ctg01g624t1	MVAWQHHQQDDSVKALSPKTGVRATGFACIGQGCSREDISGAFAARALGFGVVWRRSQARRVLGVCRSARSTTLRALRRGRQTPGHNPALLPLAAVTGWRAAQNSVCNHGRTVIPRDVRRRRRRSFDRPAKPATASRTGFGFLVLIRSRPPHAHDTSNNRTRPSPRTLLPRPAAPLFQTGSSCPAVESTWGDRLPARAPPSMVAKGRKNAASQHDRRNESSLAAPGKRVQRQKSNPALSAGSTPPTDAAPQLPSDAVEQHQHQQQTEQQNEPPPPPPPPPLHSTHSAPSSVHDSTPGCSAPVNAPAECPPVERVRSASDASLDNADVCRHAASSAAARANGHSKPSSVSMANLLAVPATILTSCPLRDVLAILIILLQLPPTVLTIVQFLFATLTFVPP…
>Alen_Al4_ctg01_-_Alen_Al4_ctg01g625t1	MCTLQKFKLVFFVPPSALSACKAAIFAAGAGRYPGSGGYTEVCFTSKGAGQFRPGEAANPNIGKPGTLEELEEYRVEAICVGRDTAVEAVAALRKAHPYEEVAYEVYKIEDM
>Alen_Al4_ctg01_-_Alen_Al4_ctg01g626t1	MSSATPRQSTRITRRRAPVVDESNNDENRTPTPDKEEKEEEEEFTPAPAPLKTGRGRGRPRKAPSAVAEDVVHKTTAKTTAKTTAKTTAKTTTTRRRTRATESVEPSQIETPPESSPRPAAPAKPASKKRGRKPRVSVEKDTVEEGGQSPVPGHSTIGSESKPESTVESEYEIKEPSATPAADVEPSDAGDRTPRAKQTPQAEEETPRAGTAVKRQRIEVVVKSEPAEDDTVQSTLEEDTVVAEPAVTVHPPSQAALEPSEIPDATAPTQPPPTPRVVEKVNANHTVLERPMGIVAKRRAAGVPLSQEPALPKQRTVITWLVLTNFKSYAGRQEVGPFHSSFSSVVGPNGSGKSNVIDSLLFVFGFRASKMRQGKISALIHNSAQFPDLDYCEVEVHFQ…
>Alen_Al4_ctg01_-_Alen_Al4_ctg01g627t1	MPPKKATTAAPKKAAAATANHGSYIDMVKDAIINLKERNGSSRQAIQKYIKANNEVSNLSDAAFKSHVNRAISSGEEKGDFTRPKGASGTVKLAKKEAKPAATVAKKTEPKEEKKEKKPAATKAKPATKAAPKAKATATKAKAPTTKKAPAAKKATTTKKTTAAAKPKANASKPRKAAATTAATTAPAVEKEVTRVLGKTKSGRVTKTKAPEPAASKAAPKKAAPKKAAAAKTTTKKATPKKATPKKA
>Alen_Al4_ctg01_-_Alen_Al4_ctg01g628t1	MLDTSKVAPCPNHYDHPYRFDELSLGTGSNEQPYFRALVFFNKKPDVTANFFHEHWKSVHADLTLQTPGAGANLVRYVQFHQDAKHVNDLQPLLEASGGSMHIMPYDGCAEFHAKSAEDFTAFMKSVWTSDNLVGCGKRFADTTQGYHVMVGYDNLIFGSAIPITGGADGILAGDTRLKTSHK
>Alen_Al4_ctg01_-_Alen_Al4_ctg01g629t1	MAYSLRSHQPTKAEIIDLAALEGHDADIHSNLGSIHHVPSNPSTRPHTPLYEKDAKLSTLERDVEKGTSPSSTSIAGEPDDGVEEDPNVVDFDGPDDPQNPMNWKFSKKWGMVLLISAITFLTPLASSMFAPGVPEVMRDFNSTNDMLEGFMVSVYVLGFSFGPLIIAPLSEMYGRLPLYHSCNLLFIIFTVAAAVSTNMSMFVVFRFLMGTVGGAPLVLGGGTIADLIPRKHRATAMAIWMMGPTIGPCVGPIAGGFITVAKGWRWNFWVVAIVAGAFFIMSLISMSETSAPVILERKAKKLREKTGNENLRSKLDSGLTTGELFRFSIVRPAKMLTRSTICFAISLYVAITYTYLYILFTTFTAVFTNQYHWHGGITGLSFLGLGIGSLIGQFVYIH…
>Alen_Al4_ctg01_-_Alen_Al4_ctg01g630t1	MTQLPDSNTSLTYTAPESPPHLSHTPLPIPGPGDLLIKIHAAAINPVDIQFWGNPLIGYVAGRKEKGIGRDYSGTIVALGSSLQDSEKWRVGDAVFGLCNRPLGEGTFSQYLKVSPATEPISKKPTAWTFEEAAAVPLVVLTAFACLDWLPTTSQSPNAETRRVVVSGASGGVGMWCVQLAKKLHRCHVTGICSGRNAEFVRGLGADEVIDYSQRDVARTLLEGRPEGRKYDLYVDCVGGTEMFNHWHEMLHKSGAYVTIVGDKTSRTAVGGPLTYFTYPSQIWRHVCGYLFGPRYANVLLCQKSKFLEQVAGLADDKAVQVVVQDVVKGILGEDKHNESWERIKQYMVEGRVRGKVVVSIT
>Alen_Al4_ctg01_-_Alen_Al4_ctg01g631t1	MESWEPLKNRKSNRNKKKQTASMSEPVDLEAGKPIDESAASGAPKSSVNPVGTPAVPHAIGASGPLDEDAMTEDASLAADKEPVKTTKAPFSPPLKIKSNTTDEKNTGDSVQDDDTVSKLTDSFVPGPSRAEVVKGSGKEELCMIPLVSAWSSDPELHKENNGDRTLASSDSEQQNTTVAVVEEASDKPLPIKANQNANSKEAILPSLSIPKKATSDVGCQTMSPTESETVSSFDHRTFSGVNNTLHRTTNDRGPQFKVQTDQGTFTVVHESVLRQSSNYFQNMCEPAYIQARKNSRELSWSPNSSFKGITSTYVHWLYNGNVPTAVIDMSDKTKVGAVLLGLAKEYVLGSQIIDTTYQNVIMDHFIAIHVRMRKLTFGSVIDVVYEGTHEGSPMRQLL…
>Alen_Al4_ctg01_-_Alen_Al4_ctg01g632t1	MPFLLRPSSKLFIRPVQRCAYSSAPSPVLNVFNYPAPHSGNIRILSLNRPAARNAISRQLLADLNQQITSIHNEGQTGPTRALILASEVDTSFCAGADLKERATFTQEDTSNFLTSLRGTLTSIQNLPIPTISALAAPAFGGGLELALATHMRVFGSTTTVALPETRLAIIPGAGGTYRLPALIGLARARDMILTGRRVSAPEAYFLGLCDRLVEITPEEQGQEGAARKKVLNEAVQLAITICEGGPIAIKAALAAVEGCALGEKAENAAYELVVKTKDRDEALAAFREKRKAVFKGE
>Alen_Al4_ctg01_-_Alen_Al4_ctg01g633t1	MAACIFCKIIKGEIPSLKIFESEKTLAFLDIGPLSRGHSLIIPKHHGAKLHDIPDDQLSEVLTVTKKIAIAQGVEDYNILQNNGRIAHQEVDHVHFHLIPKPNQKEGLGIEWPTQKADQTELKKLLEDIKSKM
>Alen_Al4_ctg01_-_Alen_Al4_ctg01g634t1	MPIDDSDDEMPQLSGGALDALKEFYGERDARLKQFESLKSQAEDDFDGKLSMDAFTEDWNVSQFWYSDETATVLARKLLDGATDETKIAVVSAPSVFIQLKNLMASGEYKCRPQIKLLEIDERFGVFKEFVHYDFEKAIQLPAELKGSFDRIIVDPPFLSDDCQTKATLTVRWLAKGWTPESVRIIACTGERMESIITGKLYGKAGVKTTDYDIKHAKGLSNEFRTYANFECDAWKWAKPS
>Alen_Al4_ctg01_-_Alen_Al4_ctg01g635t1	MSDPLVPLPNVEKLSDRVIRVLGGNPSKFTLQGTNTYIVGTGANRLLIDTGEGKEQWIQSLKSTLAKQNIRIDKALLSHWHPDHIQGVPDLLEQFPDTKVFKKDSDGEWLDIVDGQKFETEGATLRAFHCPGHTTDHMAFILEEEDAMFTADNVLGQGTAVFEDLATYMKSLDSMSKQFKGRAYPGHGPVIGDGPAKINEYIKHRRQREQQVLDVLAQDKQDGWTSMNIVKVIYKDYPQSLWEPAEKGILQILNKLKGEGKVVHDEKKRTWSLSEKSSL
>Alen_Al4_ctg01_-_Alen_Al4_ctg01g636t1	MPTSMPCPSIRIPMELLTPTAFSQFGTVIENPATSPSSKLPIPQRVPPPEHVQANQGSATKYLDVTHMSNLYNLAPSKKPAKAVMNMFVCSPRNLRSNEPSESMPSSWGDLDLDEDEDGNENLKRQLLDVTILERHPFTTQTFVPMGLSQQDKHTQYLVIVAPTLPASASKRHIGRPPPYPTPVVERKKSFRDIFARARPAPYSTEAIPPPSQFEKLHPSARPKGPGLPDLKNLRAFVATGSQAVTYGAGTWHAPMIVVGDRPIDFVVVQFANDVGIEDCQEVTLQPGKLAQEGVVVMVDTDSAGKVQVKAGVGSVKAKL
>Alen_Al4_ctg01_-_Alen_Al4_ctg01g637t1	MAAPTQLAYRTSKGIGVFNAAPAYEALPGFTPPEGNLRCKCYSPDSRYFAWASPEQVSVIDASNGNLISTVPAVNVFQLGFSPLGTYIITWQLPSKDEDGNAKKNLKVWKTLPDESEGTERTVVGEYVQKSQTGWNLQYSPDEKFCARTVTNEVQFFQSEDLRNPWNKLRVEGVTDFALSPGKNHSVAVFVPERKGMPAAVKVFQVPQFNSPVSQKTFFKSDKVQLKWNDLGTSVIVLAQTDVDKTNKSYYGETNMYILSANGSFDSRIQLDKEGPIHDVSWSPNSKEFGVVYGYMPAKTTIFNARAVPQHSFDLGPRNTISFSPHGRFVYVAGFGNLAGDMDIYDLERNYHKVTTIKAANCTYCEWSPDGRHILTATTSPRLRVDNGIRIYHVTGPLM…
>Alen_Al4_ctg01_-_Alen_Al4_ctg01g638t1	MSNTNKGSEIPTTGTRTKLVSSIDQFLKDKSSLHLGGDEDFHGERRKHLEVFGIHSIPKDKQHPIGEVEFTAVRGPHGTIPVRVLYPKSGEEKRKNGEAGALIYFHGGGYTVGSVDEFENGLRFLAEESGVQVYGIDYRLAPEHKFPTQLDEYSAVIDWLQSSGGKERGVHPDRVSGGGDSAGGNMTAAISLRRRDENKKPLNSRILLYPEARLPFDTPAAAENNSGYYLECNGIFSFADHYLPRGTPPSHKYISPGMQEVEYLKGQCPASIYTSGFDPLRDVGVEYAHKSKKAGNETVWRHYDGLTHGWLQMTAWSDEAKDAVKDVASDLKKFTYGA
>Alen_Al4_ctg01_-_Alen_Al4_ctg01g639t1	MSEALRKDFHTKAGEKMTPDSSKSTLDKTKESVTGTGDKIARESQPDSEKTTAQSLGDKVGRTKDNNVHGSTHESVGDKVKGVFGAGKH
>Alen_Al4_ctg01_-_Alen_Al4_ctg01g640t1	MSQADFLGRAIEQVKKAIETDTAGDYEAAYQQYYSALELFMLALKWEKNQKSKDMIRGKVAEYMERAEKLKQHLNQNDASNRKKPSAMGANGKSAGGSGKGGKDDEDGEQDADSKKLRGALSGAILTEKPNIRWEDVAGLEGAKEALKEAVILPIKFPHLFTGKRQPWKGILLYGPPGTGKSYLAKAVATEANSTFFSVSSSDLVSKWMGESERLVKQLFGMARENKPSIIFIDEIDALCGPRGEGESEASRRIKTELLVQMDGVGKDSKGVLILGATNIPWQLDSAIRRRFQRRVHISLPDTPARMKMFELAVGNTPCELSQADYRQLADLSEGYSGSDISIAVQDALMQPVRLIQTATHYKPVEVDGQTKWTPCSPGDSQAQEKSWTELDGDELLEP…
>Alen_Al4_ctg01_-_Alen_Al4_ctg01g641t1	MSEVQKKLQELSESYQGLQTELGTAVDARQKLESQQQENTTVKKEFDILDDDANIYKQIGPVLLKQDKTEALMSVNGRLEFIEKEIRRFETQIKGIQEKSEKVKVEIIQMQNAAQQQQQQAQAAA
>Alen_Al4_ctg01_-_Alen_Al4_ctg01g642t1	MSVLPGEVHTALTSLLQGLQSPDNVQRTAAEQQLNEEWVAQRPEVLLMGLSEQIELAQETPTRTFAAVIFRRQSSKPRKTHSGQTADLFLTLQPAEREAIRAKLLQCLANEADNSVRSKVGDAVAELARQHTDEGVAWPELLGALFQASQSQAPAQRENAFRIFSTTPQIIEKQHEDVVMSAFKGGFADSETTVRIAAVEAFASFFRSITKKAQSKYFGLVPEILNILPPIKDSRDAELLTKALISLIDLAEVAPKMFKPLFNSLVHFSISVIQDKDLGETARQNALELMATFADNAPQMCKKDPNFTNDMVTQCLSLMTDVGADDDDAEEWNVSEDLDEESDSNHVAGEQCMDRLANKLGGQAILPPTFNWLPRMMTSSAWRDRHAALMAISAISEGC…
>Alen_Al4_ctg01_-_Alen_Al4_ctg01g643t1	MSHTGTMRGTPKNRNQPARAQFVDSPSSIPRPALDTHASHVSQSDVGTSTLSASRAKMSKRDEAIRRKIETDLNKKKNPGGRVRPTRKAPPGTVLALKPSPALQISASTTVAEAAQLMAAKREDCVLVTDEDDHVAGIFTAKDLAFRVVGGGKKAQNVTIEEIMTKNPLCAKTDTSATDALDLMVRKGFRHLPVMDENHDIAGILDITKCFYDAMEKLERAYSSSRKLYDALEGVQAEMGSSQPQQIIQYVEAIRQKMSGPTLESVLTGLPPTTVSVRTSVKEAAELMKENHTTAVLVQDQGSITGIFTSKDVVLRVIAAGLDPTTCSVVRVMTPHPDFAPMDMSIQSALRKMHDGHYLNLPVMSDAGEIVGMVDVLKLTYATLDQINNISTGDSEGPA…
>Alen_Al4_ctg01_-_Alen_Al4_ctg01g644t1	MSSNGNSKLTDDYWNSNPPMHAPFKSWLETHGKDAFKDFRKDHPTSKLSYEAWCQTEQVYGGYLFYAASMIWDEDASSDEERTKRRRIARVPDHDPKRTVSTNGTGAPRTAGSATPMPVANSDELTASGKRKRKPRKKYMSQELVASDEEPEEQEEVTTANTGAATPVAPAIAVNGRSKSTSRKPRKKPLSEETISPEDENEDPMEVDGPTISSPLPVRSVPRATVATKQSESPKKTTPKQSSVKKSRKSFLVRLPFHLWDAVNLDEKSEEMVLDEDSDNGDASVAEVSRLAVTPAAKPNANATSDVKTDTNADQVAETATAEGTPDPSATNTRRGLRNRKPAQQRPYYHDAQLFDDAETESEEEDSPELSSPEPSREPRIDPVPSQDMSDFPASALWD…
>Alen_Al4_ctg01_-_Alen_Al4_ctg01g645t1	MSLTASAHRPSSKERPHHARIPYAAPNATRLRTPNATLSEEAMSNASNAPNPGEGAADSPAEEDPRTARWREHYLRTEARLNAVLGGTNALDLLDALDAAPRPASDDAPAPHDARPAVTPKKAARAIDEDDYGDDDDDEDEDEDVDDTHTSPLLAKSALHRVAAAPTTPSIRTPPPHKPAHERTSTPSSEQAKSSDDVRKQLQQDKQAAEDAAKQSFHTLFYTLESDRDAMLEQQKLDELDRQVEQETSGAPASTPANGTAVAAPQQGTLSTTNLGASSLTLKHLISRIDAQRDRVHATDAQLRSLISEVRKNRSKWANEDRVGQEELYESVEKVLMELKAGEHAHPFLQRVNKREAPDYYNVIKHPMDIGTMMKKLKQLQYKSKKDFVEDLMLIWSNC…
>Alen_Al4_ctg01_-_Alen_Al4_ctg01g646t1	MPDNQIIRPFHHPVDDIYYTFAALFITPWQARSLNSGTPAYVCHGDSLLVALDLEFKPKEAAGLRPTIKECAVGILDIRDLSIPPGNYAAAWRSKIKYLHWRNSDQSLWGKRKPPSFSRMCPQFKYSDDAYLRQQLHLLFTTLSSVDNLNMVDWNLFASQPLGFQPPAPRSGAPAVVPRDDGYLSRFTREPLYLMPSAAPPYEIPNHLNLFETQTVLCYASKAHIALEIANMRIRKPFAGAFVALLLISAAAGFSPSDYSIPSYKQSDKVLHFVAFFLLSVTFYWILETSRRKVLQFTFVVCTIGLGVASEVIQGLLPIQREFDPYDIVANVSGSLIAIALCNWYHKRMIERKRAARGYNAVAGDDDLDVELGEGMGGQETGVVRSTVDDELDRWDENE…
>Alen_Al4_ctg01_-_Alen_Al4_ctg01g647t1	MVKKRASNGRNKKGRGHVKPIRCSNCSRCTPKDKAIKRFTIRNMVESAAIRDISDASVFPEYTVPKMYLKLQYCVSCAIHGKIVRVRSVAGRRNRAPPPRVRFNKDGKKISPNQAGPKVAGAVA
>Alen_Al4_ctg01_-_Alen_Al4_ctg01g648t1	MSSFFRLAGMARPHAALRKPLSTTFFSTTAAKRPLPPNFYKQLSPSMVSKLKQPRSYSSGFGPQRQYGANMFLLKGLIGVNLAVWGYGTYALAQAKEGHAGNYIKFMHNMTMNLAEFKRGYYWQALTSMFTHQDFFHIGANLFTFWYLGRGLAAMPVTPGQFMFIVLGSGLSGSLLWLTQQEQKLQAGNGNTRQRGLGFSGALLGAMTVLACFEPRSTVQLYGIIPVPLGLIVLGYAAYDGYYLHSENSRVAHAGHLGGLAFGLAYYFLKLRRLRFPGSL
>Alen_Al4_ctg01_-_Alen_Al4_ctg01g649t1	MTSQIADQLAATKLNDAPSEANWKEGLTAPAKDARPQTEDVTATKGLEFEDFFIKRELMMGIFEAGFEKPSPIQEETIPVALTGRDILARAKNGTGKTAAFVIPTLERVNPKNPKTQALILVPTRELALQTSQVCKTLGKHLGINVMVSTGGTGLKDDIIRLSEPVHIIVGTPGRILDLAGKGVADLTACQTFIMDEADKLLSPEFTPVIEQLLGFHPKDRQVMLFSATFPIVVKDFKDKHMNSPYEINLMDELTLRGITQYYAFVEEKQKVHCLNTLFNKLQINQSIIFCNSTNRVELLAKKITELGYSCFYSHARMLQHNRNRVFHDFRNGVCRNLVCSDLLTRGIDIQAVNVVINFDFPKNAETYLHRIGRSGRFGHLGLAINLINWEDRFNLYRI…
>Alen_Al4_ctg01_-_Alen_Al4_ctg01g650t1	MLTSLARSRRLGTPAPLSSQLHKLASRHHVSAPPTAPFTHPLSPRTASPTMPQDMPPVGGYNPVQYKRNLPIRGFRPAVYLLGTGVIMTYGFWRVGQGIREHNELAREKMWARIHLIPALQAEEDRDQVRRYLADKAREKELLGTETRVYNSDRFVRPTFAITPENETK
>Alen_Al4_ctg01_-_Alen_Al4_ctg01g651t1	MDNEERPNKMRKLGHLMDEEDPAASVGVTPAYTTPVDSPAPATTEDVDTMDSEAGPSKLRNRHLDLEDPAASVGVTPSYTSPVDSPAPTEASEAAESDTRPAKLRKLAHLQEDAAASVGATPSYTTPIDSPGPVTTTNSESAIVADEASGGTIEEPKISKNQLKKQRRHERWESGREDRKLKRKEKVKEKKERRREAWAAEHQPDENGELPKLPSNRPPRHTAGNGTQVPITIVFDCDWEDLMFDAELKSLGLQITRCYSDNRKAQFRTHLALSSFGGKMKERFEGILGNQHKSWKGFRFFEEDFVEVSNKSREWMTGLRGGVVAGAMKPTGDIPEQEQTEDAETTEENKPSDEEGEIVYLSSESDNVLTTLKPNSTYIIGGLVDKNRHKGVCHKRAVA…
>Alen_Al4_ctg01_-_Alen_Al4_ctg01g652t1	MAHITLSHARLGVIRGLRDAHTSLIKILGLPYGTIPQRFGRAEPLQSLSNSSRSQNSVFDATKPGASSVQPWGSVTMDASNIPLPTDNLPDDEEQSEDCLNLSIRLPPTCLNSDGVLQSDAKLPVLVFIHGGAFFLGSANRPYYDPANLVLHGIQRGTPFIMVSINYRLGILGFMHSPETGDLVPENNGLHDQDLALDWVKNNIEDFGGDVNNISLVGQSAGGESISVKTICDPIFKRAIAFSGTPVTMPSMTPEEHHENFLSQASSLKIRTKDDSGKERNAKDIANDMMAIDVSKVRDLAWVGLPCANTEYFPVKKPSMELTKSGKMAPENWRERFTPVEAQIVGSTTYDGGISYNMMSKDDSRKAHAKAFEHIAKDVLGDDNGAELCKLYGLKPGMP…
>Alen_Al4_ctg01_-_Alen_Al4_ctg01g653t1	MSSTADEPRSPPPRTPQRASSFFTYPVSYAVGGILRRLNSDASSPATTNTSANNTPNRRQSQLASTANSLSHSLASLVSNTATSFSSSTVDTGADMHGALHNPHRTASPFQPPPLTPLSLTGWKEGMRESGKLLNTALAEEIRLLVPPRLQLVDEWSLMYSLEQNGVSLATLYKNADEYRGKRGGFVLVIKDAGGGVFGAYLSDAPHPSSHFYGNGECFLWRSHVLTSLPDLANLPPPPSADTTNATRMTTIATTKPTSDTLSPPASGQASRSGTNTPERIRFKAFPYSGVNDYMIFCEHGFLSIGGGDGHYGLWLDDNLENGVSATCPTFGNEPLSDDGTKFEIMGVELWYIGS
>Alen_Al4_ctg01_-_Alen_Al4_ctg01g654t1	MTSTTIVNKKLSVLSVGSSAELHAHRQSQLFRELELLLDLTPSTFSSPLLSLPRELREHIFSYVLPSHNTRPELHTCLWGADMIAGEPWRHTIFGYNNKVPKDLRLRPELLHINKKLRDEVLRLYWGRSKLTLHAELRNTKFQNELFDYSPHILKLPLLSSVTHVRFYVEWNYTLTKAASKAARLEDYVRMTDDFCKAMDEILSKTERVEGIELSVLFFWKYRSGKVYSLTMSDLFEVEDVLKKYAEPKWLALLQKSQSQAKRASGLGSASSKDPAVTSPGPDQSAGVGYKLSSERKGLEQSGGMEIFVSADLEECMGKKRKEVDFYGNFAVNDILPQPGYEAGIMI
>Alen_Al4_ctg01_-_Alen_Al4_ctg01g655t1	MIASRHQESAQFRILQFMASHDPSIAVTRTGFRAVARIQLTHGKTEQEKDWAELKGPSWPPWKESRTAMDEDKGYEYGASRASKILHRMFEAGYAARTWEEVAEVYAGWDTDLSPTIQTRTLLPFGFRGNNTHRLWAARIRTTRTRREAWACFLAYETSGTPAHEEIYLAMFEKLYYLEAQRRVEGDSHYDMEPEKSPEHTAATLLPGDMKEVLPDPSSPLHNVYLSEPVPTYEQLYRRMTNKNMRPTKRLLAFLLETYPDFATLYKLLEKAQGDFNGGVGCLITGNHDDTSTVHEIPGYFLTAFIRFLCRFGHPTRALPAKTALLASNQHARQFMFNENYLLEYAYALLLHYKPRYQPAWTAFAERVVFSRFGSQSLYHEKESAMGITDVQYRIVTKL…
>Alen_Al4_ctg01_-_Alen_Al4_ctg01g656t1	MAAANDALTPPSLPTAPTSPSVAKRKHADTAVVLSNGVSTAAHKEAPNGTAPTLQTVLEDVVSILKSYDTEPSILARSITPSPARSSSGEADSKRAKLAQSTSPTTITDRLNNGSYDSLQALEKDVEIATAEILASSGDSDTPATLDEMRLQAKVLAFQKIIKSLVDREEARRVQARQEKADSATATESAAEEDAAVPVKEEEGDDDETEPTSRTVLTLFGTAQGPKQLFSSLQQPKKVAPADAIPALDTSVKVTLPLREATLPQNIQTTEVFPLVDSMDEKKKKVTTIGEVFRAPAHLPQISPPKIARPTTSKGNTITFAHTEPTKPKRKGSQSFAHQSQSAGFWLGYGGVDVPKDQTSPTARQKSRQRALSTGEAQQPPSEAILVAVQQAKEDAMFR…
>Alen_Al4_ctg01_-_Alen_Al4_ctg01g657t1	MAHHLLRGKLAGVNNDLSHGLGPDLLILDHIRNYGINSKITQVAYDPVQSLIAVGTSESKFGNGQIYVFGQKRIEVVLPLPHRASVKILQFCAEKLLCVDSRNDLSVFSLETKTLVNAHSPPAKITALHSDPTIDYALLGTQHGEVFAYDLDRQSLTPLRIPNLWREQFPRSRLTSVVTLSLHPRDIGSLLIGYNSGAVIFSFKQNKALKFFNYVLPKGAPGGDSDPGSIYKEREPPLTQAVWHPTGTFILTGHEDSSIVIWDPKDGRIIQARTLQDVNVDKPGPGTFSPGAGEGTFALKSPIFKIAWCANQDPDETGILIAGGQPSNISAKSLTFFELARTPIYNTSSWQVLSDHFENPKRQRILPCPPGAEVVDLCLIPRSSPHFGGCQDPIAIIAL…
>Alen_Al4_ctg01_-_Alen_Al4_ctg01g658t1	MDAITVYNVPSQPPKWDRVGIFYITYASVWTTIIACGMAFCLCNRHIPALRIRSLPLAFSGILLLHLYWFMGQIVYPIGSAMPVVTAYVVQYFIMGMWLPLGIALFHAANLRFLKVAELQKQFESTNPSVRSRAGQRRDAPPAAWMARLRTMDRDKKTFVLIGVGMIFQIVLTIGMWAACRKYHPNFGVAGTEITGESLQEQVIALGRGWEWWPSVVWQFIWTWMVAPFLIWSAWDIRDTLGWRAQTIGACVSGLHATPMFLIASYSPVFYTSGVNSYFPPSQWIHLNTMFIEIFTVFIPAYQVVKHWRAQRLAAEAKWDTSSSATNISIRPQSKASKSSTIELIDRNTGIDFLQSGDRLLTMTALTRVLNENPAPLQDFSARKDFSGENIAFLTRLAK…
>Alen_Al4_ctg01_-_Alen_Al4_ctg01g659t1	MSFGGQTPTIVVLREGTDQSQGRGQIISNINACLAVQSTIKGTLGPYGGDLLMVDENGRQTITNDGATVMKLLDIVHPAARILTDIARSQDAEVGDGTTSVVVIAGEILKEIKDFVEQGVSSQTIMKGLRRASNLAVNKIVEIAVDTAEGNQRDTLQKLAATAMSSKLIHRNADFFTKMVVDAVLTLDQDELNERLIGVKKITGGALQDSLFVNGVAFKKTFSYAGFEQQPKSFKQPKIVCLNVELELKSEKDNAEVRVEQVSEYQAIVDAEWQIIYNKMEALYKTGAKVVLSKLPIGDLATQYFADRDIFCAGRVAADDLDRVCRATGASLQSTCSDINEKHLGTCEKFEERQIGGERFNFFEGCPEAKTCTLVLRGGAEQFIAEVERSLHDAIMIVK…
>Alen_Al4_ctg01_-_Alen_Al4_ctg01g660t1	MAAKSRNKKVTPTSKAVSDDICMRRLDRYSKESVEKQISIPETITALDTYPPFLRIPSEIRREIFRYVLPSSNKRFILYTDCDSTVISKKWNRKCRPHPDKHLRLDVFRTSRLIYHECLSVMYSENLFHFYAFNYLPVLDFIRHLSPEAKSLVRKVRLTPLTDKQNDLPANHDIFCTVIHDSLPGLSELQADPVVFF
>Alen_Al4_ctg01_-_Alen_Al4_ctg01g661t1	MRDTMRSGPSVHHGMHPAADNVQSAFDFSEKADSERDLTSDRGRSHDGGAHTPERRPSGAHDDDPFGDEENSEVKYRTLRWWQAGMIMIAETISLGILSLPSVLATIGFVPGIILIVTLGALATYTGYVLGQYKAAYPRVHNLADALEVMWGPFGREFGGAAQTIFLIFVMGSHILTFTIAMNSITESATCSIVWGVVGFVVLWLLTLPRTLKKVSYLSIISFISICGAVFLTMIALGVDPKPNLNLAATYSPSFAPAFLAVTNIIFAYAGHVAFFSFISEFRDPTEFPKALFMLQVTDITMYLVVAIVVYRYAGVDVASPALGSASKVVVKIAYGIALPTILLAGVIYGHVAAKYIYVRIFRGTRHMGSRTWLAIGSWAGITLTLWTIAWIIAESIPN…
>Alen_Al4_ctg01_-_Alen_Al4_ctg01g662t1	MRTSTLSTTVLLSGLALAQNSTNATDSGTCLNQRMLDLASTGSVNSTGSESFTWNSSAARDQGITDPWIVSVTVNDTLRGLEFSSVPSNGGNIAWPYLSVPDSARNVSVCAYQFRSRNTTSTGNGSGNDVGCAGVLSEKCTTYLREALLNQASGGYQSELRCKSFPESERERRDEACGSLLDMASAGNRYPTFQDPTNDTCTYPSLSGVDIPDNYVTRNMLSSLDPFEVGPGARWANYSNMAYDLLVVQPVPFALVATFASDVSGSSNLIERDVQFVCVTPNNTQPGSRVPENRTPWDSAAVRWRAGGMWSIAVASTLAFILSL
>Alen_Al4_ctg01_-_Alen_Al4_ctg01g663t1	MAAPIPSPGALRALRASIAPYTRHTQQVRHATLLRRPKRPYTFTQLITLSDGSAFTLRTTNPQPVLKSAKDIRNNPLWNPSSQKLLNVEEDEAGKLAAFRAKFGTVWDSESDKGKKGDSLLDIIGGAAKQADAPKPAPAAPTTPAKPAPKKK
>Alen_Al4_ctg01_-_Alen_Al4_ctg01g664t1	MEPPCTSVQRARDSPTLPHTYSDLTERPGPCVVPSQNSPAPRRTATIAHLRCYHATRRLHEDQSIHGFLREHDDAPAIEPAQLKEDVRCLMRKVPASVAVITVAHHDADSGKHVPMGIAVSSLNTVTLDPPTVSFNIKEPSQALNAIRAANGRFRVHFLEALGTGRKIIESFCKGNHPDAYAHRWKHLRMHVPQVDSRSPTTTPSAPRILGKSVRAAADCTLTQELTVGDHVILVAHVTSLKTKDGEAPTIAYVDGTYRSLHSAFVLRHHGELPGAQQPATQTKAQQPVLDRAHELSMAYDYPLLPGEQERREYADRLQTYLKDLRVDNIRDFMKVLQPETRLIARSFGIDMEALFHFCQHGAATKRQQILPEFYGQLSSADMARVVQRATKMVKADAR…
>Alen_Al4_ctg01_-_Alen_Al4_ctg01g665t1	MTRLSYVIALLPCAIALNNHATPETKRVAIIGAGAGGSSAAYHLAQYAALSSTPTNITVFERSSYVGGRTTTVDAWSDPSIPIELGGSIFVDVNHILVNATRDFNLSIASSEDSLATRLELPDLGIWDGKQFVLVTREEDGWWDKARLLWRYGLAPLKTNRLMKSVVGRFLDMYEEPVFPWKSLGEVLESQGLLDITGVTGEQYLKANGIGEVFAREVIQASTRVNYASNLAYIHGLETMVCMATSGAMQIDGGNWRIFAAMLKSSSSITTHLNTQVSYVSKQDDGTYRLSINDSLSTFDEVILAAPLQFTNLTISPAPQHTPDAIPYVKLHVTLFASPFQLNPVAFNLAPGESVPQYVLTTLPPSEKPLDGHPGSPNFYSISMHYTSLNRRASPPRQE…
>Alen_Al4_ctg01_-_Alen_Al4_ctg01g666t1	MDTFSLLWRSPEVNPINQKARSIPFLNPISTTYGRTFFFSWFGFMIAFWSWYAFPPLLADVIAGDIHMKQYEVANSNIIALTATLIVRLIAGPCCDHFGPRLTFAGCLLAGAIPTFLAGAVYNTSGLYALRFFIGILGGSFVPCQVWTTGFFDKNVVGTANALAGGLGNLGGGITYFVMPAVYKALVSDGLPSHKAWRVSFVVPGVLIVFVAMCLLLLCEDTPTGKWNERIAAAEENLRRHDVKPEQHEGQVVNIKGDLQDIPRASPSSSRLGSTAGIEKSSAPSPVNQDEKKHGWKDNEALQSDTQMYTTASTELIQKPSLTSILRTMTSPQTLVPAACYFCTFGAELSINSILGNYYTHHFPTLTLQDSGNWAAMFGLLNGVARPLGGWLSDAAYRR…
>Alen_Al4_ctg01_-_Alen_Al4_ctg01g667t1	MAPVSWQPRPVSTATDATDTTDYTDQTDQVIEADPDNRSLCSADIEAELQNCTPEFAKVVRRYGRTYQNYCAGAYPFPNDKVTLPFIPKEFPRSEIQGIDLSYIQPHNIPSNCNFDIDNIGHEAWWTKGFCHYYDYIHTRMSLGIFRDFREVIQKGFNNLEPGGYMESQELYSKVFCADGTMPDTWPFLEWSKNQDEAAMRLGTPLRIANKLKMWYEQAGFLDVKEDVMHIPIHEWAKEGRLKMFGSFMAKNTQEGLYGWTVDYFHRAFGWTEDQARVECARVHKSLTDKSVHAFYKVYVVYGRKPHVGEAPSQVPKPDNWPTESTCYDDDDDSSMG
>Alen_Al4_ctg01_-_Alen_Al4_ctg01g668t1	MAGVPSIDDPSHISRGYGDSSQPNVGVNDFATSGGQHARRGRFEEDFDARTRGSSVIDGDEVPQRSASRASRASSTLRDSTLNQGATPSRSGTLKKKSSVKRSGSLKRSGSRKSMHAGSIRGVTIDDQEHGYDREESVFYTPVPTKGSPTDILADRFQTWRKFLKDLITYFREVSSSYEHRAKSLLKVSNVINNTNAPASLLSDGGLNDANRFLRDFHKQAVVEANKARDIEADVINQLSGLRADLAQKIKEIKSLSGDFKNNVEKEKENTRKCVTALEEALAVVDSDPSAIAGKGDPYVVRLGVERQVERQIDEENYLHRAYLNLENSGRELESIVVGEIQKAYNALATILKRDADELYATVEKLRSGPIAMPRDQEWGRFVRSDAHFVNPDLPLRRL…
>Alen_Al4_ctg01_-_Alen_Al4_ctg01g669t1	MKLSLAIAALLPLLSSAHTIAQRVRVNGADNGEAVGIRTAQSNYPIQNVNDANMACNSNFKQPVSSKVIPVKGGDRVGVLWGHVIGGAQFSGDPDQPIAKSHKGPTIFYMAKVDNAATASPSGQKWFKVAEDGLDSSGKWGVDRMISNNGWVDFTVPSCLKAGDYLVRAEIIALHSASKSGEAQFYMGCAQVRVSGTGSSTGSQTVSFPGAYQANDAGILVSIYNNQGQPMGNGQPYKVPGPAVLKC
>Alen_Al4_ctg01_-_Alen_Al4_ctg01g670t1	MAFRPLLRQRAVVPALAALSTAAVFAPRIAHAEEQPGDALVRNTPGDALNRKPIYDDLPLDTTEPTAPALTQPSNDLIPDAAYRPTPTDRLAHQIGQARMAVYRQAVRGEQAVDGALTETLRLEHSFTTTIRSLAPPKESGERIFPGALYVLVAAMAGSIVTRNRNLVLRATVPAAVGLTAAYAVLPLTMNNVGNLVWSYEERYPVLADAHLRTKARINHFIDTGKAHAGMTVGMVQDKVSDVRDNMEGWVKKGR
>Alen_Al4_ctg01_-_Alen_Al4_ctg01g671t1	MLQRLPRPRRPPWVCAHCLQQAQRPRRFIANVTATANVTATANANARDAAPPAAALYGLSASSKTDDSALRSVFDNPAFWDTFRRASKTSAHAGIIGNKYLTHPDGFIDFVTVTIQRCNAVVQNVADAHSIPDFKLLVKELDKLSDLLCRVIDLADFVRGTHSDRKFHIMAVKAYHTVFQYMNQLNTTPVLYDQLKKASEIPDVYESWSEEERIVARILMDDFARFGIGLDHATRQRLVDMSGEIAEVGSQFVEGMAPETRKLKFSSKRMTGMDPNLAKALTRWGETTISTMHHESQSALRFVQDPDVRRDVYSAVRTAAKSSIARLEKMLKLRAELATVSGYETFAHMTLENKMAKTPEAVDQFLNALYQDNQPAVMADLDELIALKKSDAHQDNFPD…
>Alen_Al4_ctg01_-_Alen_Al4_ctg01g672t1	MASVFTFDPDPPRVSSPWAMPAAGNGASSPALQQAAKPIPSRLGVTDDQKMLASTQIPIIDNTTVTRLEAEPQEGPTEYKLHLLLKRRRSFTRFSTGLRASGSLRRGDGISSVAVNRAVTDSGTLASTPPPLTSIQSRQHRLEQLTTQLLWRLQQSCPYHISSSTAPLLPHLPDDAKLTTPEMPQRLLPGLEESKGALYEIGVADDGSIVGLAEDEMEESLNNLRAMAASLGCRVEVQRMLSVGECEWVENNGPKQRKVRTSKLLAAEALVSPDQHLVDHLKATQHGEEEVPADSTAARTATTALSEGQSSVEQLRVSLIGATVSGKSSLLGTLSTATLDNGRGKSRLSLLKHRHEIASGMTSSVTQELIGYRDSVGPDGVVSTQVISYGSGDVDAWID…
>Alen_Al4_ctg01_-_Alen_Al4_ctg01g673t1	MSKLEYTMPHSQYGMNHYGSSQSSYSPGYPPVSQQAYSDSRSSTAGAYASSYASSPGLEHEQHPRRDDEHTVLPPYQPQHSSYPRSTYHQQQPLDSVRPSSATTGYSYPAPHSNLPSQNLDSNASAYSPPALYPPTTYGMGDYRVSLPTMYPPSSTTPAAYPTYESPHGLPPLSNSSVPALSSSPSIQNNAVMPRVLNSRPKPQCFDHGCNGRQFSTFSNLLRHQREKSGTAAKSFCPKCHAEFTRTTAMKGHMQHDKCKARRPSESTSIPRT
>Alen_Al4_ctg01_-_Alen_Al4_ctg01g674t1	MSTGRASDAGGAAEISRVGRLAAPLCSCILDHNHLSELRHLTDDTTSVCAPPAPHELPSGLHKLPRAADGPAADSNASGPRLRVGARLPVRVAAPCLSTQTEAGKAAQAQAQAQAQAQAQAQAQAQAQAQAQAQAQAQAQAQAQAQAQAQAQAQAQAQAQAQAQAQAQAQAQAQAQAQAQAQHKTTRHYFSASAILYYVSTESQSARGPAAHPPTFPDQPLTDGHGACTHLASSDLSPPLTWPHPMSSFGVYYPGLTPRCLATSSGTPAPSRPSLPSMRGSPLPPPTLAWNRGKCICPRLSTPPRPPLRRVSAVAGHGRT
>Alen_Al4_ctg01_-_Alen_Al4_ctg01g675t1	MTEHAVSVSLPTWRANIGYEEGEEWVVSKMKTGYPRFFIHKTNQAFAADIVEKHGREGEGAMLFPTHCTASRCQDFILRTAADQDTSQVRIVDLVPAAEKARATEMNAISPRISAVLYPLDLFKFAKQFWQHSGDGVSSRRAEYCHHLFEKGVLLDAAKLNEPTRFCKGPRRYQNKKSIDLDAPAVQQDAETLTQFVEQRFGRNLDLSMTKNAKLAVRRRIAGSLTADVALTEALSLDMDSERTRQVADFSEDDVYLYPTGMSSIFNTHRNLLAAKGQHKAIVYGFPYIDTLKITEKFGPGSLFYGYGSSEELDDLERRLESGEKYLALFTEFPGNPLLRSPDLERIRKLADKYDFCVVVDETIGNFINVNVLPYADVVVSSLTKVFSGDSNVMGGGLV…
>Alen_Al4_ctg01_-_Alen_Al4_ctg01g676t1	MDNLTPSDLFSPSKARQQRARAQDWAHIDSWLSYKYAGRTVPTFERNEETLKVLRELSMANERADEERAILERVEREALKELDEVTTNPSDAHIISTVRAHLTPEGSAALTALASTTIALSTPTPDPQTLAHALISHTATTQNLSNQLAHIQTLQQYLSKQHALLRAQLNELQTNPSFSAPSSLQRQTIEQTRQTKHLRSKIREAESQLSSLQSSHARAVTPGSKHIASAEAITDMLEQQRALEELRDRVEVLENEVEEFGGLPADLGAARKEVGRLEVRCDEVRRRRDELFEGLVG
>Alen_Al4_ctg01_-_Alen_Al4_ctg01g677t1	MTSPPATPPPDSQGEQRFEQIYELCEWPEDYRPGGFHPINLGDTFRDGKYKVIRKLGEGSFSTACRPKYVALKVTEAESSTACTELTILDHLSKVAHKDPNSRHTMQLLDSFRHKGPNGIHQCLVFEPMGGSAASLVEELPENNPKMYGIPQRYPKRMAKIILLHALRGLSFLHQNSIVHGDFQPGNLLFSINSIDEVEQQHLEQDEAHTAVPLLRLDGKTDRWAPTKLYVRQSLHHHAQLGLDLCVKISDFGAAFRTGSPPPKPVTPRALRAPELILKQDFDSGIDIWSFGCLMYEFLTGEVLFAVMMIGRTQQDRDDADDDHLIQMHNIIRPLSSLIMGAWPRASTWFDSEGKPVQQDGGDETEEENGSGIYVYDTLEQRFAKRKHPDIDDEEAAVI…
>Alen_Al4_ctg01_-_Alen_Al4_ctg01g678t1	MPISVSFMSKSMYTASKKQLQKKAHLVSLIQAFRNIPATAARAVVISGLHTSRSDRRMHATVDFFDDKDRSLGRKHIVQDEDIEDGKQDDKSK
>Alen_Al4_ctg01_-_Alen_Al4_ctg01g679t1	MIPSSPSRTPVPIANGIVDFPYKWDDITSKLNLTSNKDVPNFILGPIFLSHWTKLRDQLPLVPNTPINIIALDDKAAMVDFCNTIYTAMDCMATSEYDRPTSTDRTTWQPTEHIECLVYQCARDLAQPDRAFHAAFERQKQKNEAGRKDALTRIRGLAMLVLNLVINYTLMPPSNVIRKIEAVRPAKDPNCSPIPEVRRKWQLENMELGDLRKTVLDRQRKGVDEKQWLVDILMKDVKGGGGQEESEGVEVKREGDARVGGIKRKMEEDDEKEKKARLGSVVL
>Alen_Al4_ctg01_-_Alen_Al4_ctg01g680t1	MLDVEDFDAVFRGHNYTDGLVQQIQEYQHALGGQTFFERLLELLKIKGRKAYPPKTPQQLHDLHQRIVSSETTLHNKHCLIFYLLKDLSPQHHEEDELATAFARDVHLEKRFWTFIEGLWSLDHLEFANAVGNLTHPSIIPTFPDEIMLTLLNGMEKLNRVNVQKGEQDEVLPLAYYNCVKPPLEDQKVRNEFAKYLSGRNVTETYYWIHTRPEHEQKPLLEILIEQTLDKSTWNNGVGDEVYAREDKAMELVSLPFSDEEEGFIEKFLTDGKGRSFRNAEDTVMMRRIAMGRLTDVAEEQNTRGRRQDGVNWDSLKDGVKKGLGPRRDEDGFVF
>Alen_Al4_ctg01_-_Alen_Al4_ctg01g681t1	MATATQRAEDVDVIKGADEVSLPQKMLSAVSGSILTSLLVTPLDVVRVRLQSQETPQKASPNTPRGFNGATLGQFRDLPPNMGISACCREVFWMNNKAPFCVAGPTMSPINPADLNCAVEEVQRRTINSTWDGLRKIAQNEGPRTLWRGLSPTLVMAVPANVIYFAGYDWLRTAQASPFRQAVPDAYIPLVAGATARTMAAITVSPIEMFRTRMQAANHTATAAGHFRETMDGLREMVGSQGVLSLWRGLTLTLWRDVPFSAIYWWGYEATRNVLTDVRGRAEARNDGFEFRMGRGEEKIKRRSRSRSRENPKDTIVDSFIAGAASGGVAAFVTTPFDVGKTRQQVVRHAGKAAKDAVETVRPEDQSMPRFLMHIYKEQGMSGLFKGWAARSLKIAPAC…
>Alen_Al4_ctg01_-_Alen_Al4_ctg01g682t1	MDPQNNTTSTEAELESFRQRWREEVSARAKGKTPVASAPPARTAAPSASKPHAPKGTAPDAASHSHARQRSVEEADEITPYAHQDLGDKQHGRRLDETSAQTAAITSASKEPKTALDHYEKAVERETQGSLGDSLQLYRKAFKLDDGVHEKYKAKHFPPSFFKNKPRPQPQEPSTSATGAAPKPQDPNPSNAPVTVPNTAHHSLHGLSASLQTLLANFSTLSINGEPPPTDLSPAPPCPIAAVPEEIIVQILEHLAVQDLAAFVRLAQVCKRLAYLVSTEDQVWKRLALGYEYGFAAMHYSYTCQIDGRPLGDDEEGGFILGNDSDIEDNAPSTPPSPASITQMLVPSPYPSYRALFYRRPRIRFNGCYISTVNYQRPGAASTLSLTWNSPIHIVTYYR…
>Alen_Al4_ctg01_-_Alen_Al4_ctg01g683t1	MASNAATELMQHLAARHLHPKSAWLQSFLSTTRSNTAIAALKQTCLFRLLATDITTSLNQPTALLLPEDVLRGTVQSRPLAGPFVCQVLDIEDIGQSRWSQVEAIEARERGEMTKGREIVRVIEPENDDSGQAAAPAQSKGPFKLLLQDAKGTQIYALDLRGIDGLHTNMSMGVKLLLRNIDVRRAVVMLEPSNVQILGGKLEALDKAWKEGKKDRLIKAANAGGDAT
>Alen_Al4_ctg01_-_Alen_Al4_ctg01g684t1	MSTIASPRASSSIRSPSSTRNSFDSSTRPPPNARRNRAALRDYYGIKNAQKEADAKISEESKRTGLGPEEDETLTELDAADFNAEAFVDSLLAKEGLQGVLKVEADLVSQIRNLDSDRKSLVYDNYSKLLSATSTIRRMRGNMDPLAPTTHTLGPAISHIAETAASLSSSMQGLQKKPEGLGIDIHVQGEPAEEEAAAKKRRQQETVRWVLGTPRRLRDLVDQEQDEQAAKEWEEVSKILDQWRNVSGVEELRAACESILNEDAESD
>Alen_Al4_ctg01_-_Alen_Al4_ctg01g685t1	MLALTTSSLAALLLLAPVASSVSVAENFLETLRTPRPFHAQPWPNRNRTCVAESHNDLKTDDAEKILQAVQDCNNGGHVIFAEKQTYTIASPLNLTGLSSIDLDIQGTLSFPADNLTYWQANSFDLEYQNATSFFILGGSDINAYGSGVVQGNGQAWWDEYVNNKKLKRPVLFAIVGLQGGSVSGIKMRNSPFWHNIIANSSDVVYSGLDLFSTSNNGNFEKNTDGWDIYRSERITIENSTITNGDDCVSFKPNSTSILVQNLRCNGTHGISVGSLGQYPSRIDYVSNIHVRNISMANSSEGARIKVWPDAYSEKSAALTGGGGRGLVRNVTYEDMDLDNVDYGVTITQCYGQDDEDECFKHPSKLNITDVVFRNIRGRTNRVFSPIVAHLVCSSPDTC…
>Alen_Al4_ctg01_-_Alen_Al4_ctg01g686t1	MDHATLVFSSVFPVLSLSHTTPTPVATPDLGFTAPGTSFGSPYIPRQHELHDSTQHRAVKRTIAWSCATRFLSLDKVVPAVPRILHRTREVEDALVYLLVGEGRVEEGARHGEEGLVEWYTNECRLHFANNVRPELDELWRDEVRIVRSWDVLEESQKVLEQVQNVYLEPFNEHVLPFLQGNASASVRPTRPTRRDEDDAAEHAKWKFRRDVHALFAHCITPRRFSKTLSYVLYDAGCRLFRIYTRQDGVQPSATPEDTAELRQQMTTLLQGLERVGLGDESAQKAFAYAMNKLLDSFINSHYLKVDWYSKKAVVPQLKLWIRDGFCPLVELVLECLRCEQSTILPTEVTSWQEMALGRLGRVRVDNLFDFVIHWDKSLGAILDIKDYLKVAGAKQHLT…
>Alen_Al4_ctg01_-_Alen_Al4_ctg01g687t1	MASPLSTPGTPRTSSPLTLDDDMARSLSLSPSPHDVHGLATQKEPDDAWTSLLAVSNAAGASPAAERAKPEQPHAPNGKGKEKELEMEKEKGKEKGKEKEKEKKKDPLRLLDLPVDVLKEIIHQLPHTNDLTSLSLCHTALHRLTIPCIYSRFDIVWPDESTHMEPRSGVDALTYGLATLVMGDDCFPHQNQRYREHAVHAANSQAATPYPIPRRRFGNYYGQFTKKFSLGNGPQAWVHEYVITKESGKMLGTLVALAIARMINLETFVWDMPTGVLRDVWLALSSLAGRNDGDECRLERLWIRWHDNTIDAPVPPPAPPMILNNANLPAPPNTTHPSGLGSIPPPIVVPQPFPSNSMPALERIEHPTFSVIPALKSLSVLDIDELPYLDEMSILIARS…
>Alen_Al4_ctg01_-_Alen_Al4_ctg01g688t1	MAAVMSAKRPRALTNGIDAVSGVGHRGRNKRPRQSPPADEERSSNNSDASDSDNDEQDVTRENDQMVWATQQVQKDFGAAKNLQNVPTDSGIIEEIRCVNFMCHVNLVMTLGPLINFIIGHNGSGKSAILTALQICLGGKATATNRAQNLKSLIKEGEDHSSVRVRIKNQGPLAFKPHLYGKSISVERHFSVTGASGFKLRDENDKVVTTKKAELEDIMDAFSMQIDNPMNVLTQDMARQFLNHSTPKDKYKFFLAGTQLETLHRDYQQIESSLELMNSREEFTKEIINTRRNEMEILVSKAKRAGSLEQMRSKERELLKQAAWARVEEDEEELAEAQNEITRLDGLIETRTAEANDASVAFERADAAVTGAQEDVTETTTRMEPKQQVVQECQEKFQA…
>Alen_Al4_ctg01_-_Alen_Al4_ctg01g689t1	MSYHHQPGQPQLGATFVPGGFDDYYMPAPSPEVISPAPQRIMPEVPENMQENIAYMELEANGPRSANTMMSPGQDFNQSQGGFPPRQSSFQDGPAPGSGEQWPARHASISAAFRGPPNVQPHNDFQQPSHDYNQFAQTGDAPNFSPFPKLPSRPPNVPPSDDEKEAVLENARLPVLNSNDPEMQLAWAQDALAYVDAAQLHELRIAETQGARPSTPQIEHQLRADAMNVVQFLADQHHPKAAFMRGMWLEFGKFGLRADKKEAFRCYSRAAGKGYARAEYRMGMQFEQSNDPIRALQHYQAGAEQGDSASNYRLGMMTLLGQHGQQQDYARGIQLIRTAAASADENAPQGAYVLGMLQSRELPQIQVPDAFLPYDEKAARQNIEKAAYLGFAKAQLKMG…
>Alen_Al4_ctg01_-_Alen_Al4_ctg01g690t1	MSVVSLLGVEVKNNPAQFDAPYEFEITFECLEQLQKDLEWKLTYVGSATSNEYDQELDSVLVGPLPVGVNKFVFRADPPDLSRIPNSEIIGVTVILLSCSYEDREFVRVGYYVNNEYVDEALALEPPAKPVIEKVQRQILAEKPRVTRFAIKWDSEESAPPEFPPEQPEADLNADGDQYGIEEEDEEEEAEGAVVEGDDEAMAGGEETAGPAVEEEGEDSDAGSEDIDIEDSEGDDDEEEEGGDDDMEMDDGEPSASNGDKQAQQQPGNVQQQHGADVMVH
>Alen_Al4_ctg01_-_Alen_Al4_ctg01g691t1	MADSSNSARAKSNDQVPSSLSNTAGTVSERKTQNAQPRVRRRNRIISSCLECRRRKLKCDKGQPCANCVKASRQCHFIAPGFDAAAQARLAEVKEKMGILEMSLEEDIAQRNRIQTNSSSSFNNSSSALAQNETYSEEEEEEDTKYLKTTEYAREDSAYYESEQGDDDIVDLGIAMGKVRITERIGGLVRPKFSDELSQALRELPKRDPQDSELSLSDAVGWMMPSIDYVAPSSSFFFAPGAERRTLMNYLPTRSLVDKLMAHYWQAVHVIARTVHRPSFERHYEKFWKDITNGIEPRKSFQPVVFAALLSSVISMTSLKISTEFGVDKQGLVDNFREATEAALSRANLLRTTKLETLQAFVMYLIPLCRAEVSRAHSALTGTCIRLAECMGLHKDPTA…
>Alen_Al4_ctg01_-_Alen_Al4_ctg01g692t1	MAEQDEVASKVLRRAQVSKMTRTLQNRLALANVKIKNGWESLSIDAIEPVIDVELKRKRPGSSNEAMSDASSVSDRFYKPSVLDSSPLAAPIFSDDVRRSATRSVSSGSQHKRPRYDKPLSRYPASSNHTRNKVVRSATSASSSWKNSFQLPESSPVYHRRHARFGRTHVPSLSFVSETSTIPDEPRSPLLSEEDDEDLPITSFQVNKSYFRSSPIRARAPRTPPPDVARSARLRQRGFTAAGAAREGKNGDEDATLLMYLATSPTPVRVGDAKHLMQAPSTPPSRTTPLPSSMMSTPGGSGQAYGGFGVATTPNNLNFAEFLNMTPSPAQAQFGSSWNRTPVTGKTPAAVREARRRINFDNLVPPTGDGPRIVTKVEGLGMDLGGELVS
>Alen_Al4_ctg01_-_Alen_Al4_ctg01g693t1	MPSFLHNLRRKSSRASTKVSDKNSDLSSQATTKGQYGAARRPSSSTMNSSPVGSSTPSTTPATSTTEGDVPPVPVRPQRPSVDPVKRYSINGLSTTPTNGSAPHNSFNRSSLLAPRVISVSDNSWVHQQVLLIFGQVGEPSHKPLDGNLTVNHHQGRFPPTCWPVRDSYFKALVHLEPGWNRIRLDFSSPKVSSGNTSISPHATFMNINYLPLTHSPPLQLAIILGSDSPGTYDAPPSRIQTEGNGLDLAVKKFRMAAYLWQAFTGEQMKRHGFGRRCFRLEDVWEPGTISYQDWEPGHFRTQAKVHIIRSSKTVAEIRDLDRAQQYGPGTKKGELFGIAADAVKDYFHITPGQKLYVSCMFLDSTWDAKEQVIRGHAALGGGVPDLQLGIFGSQALHS…
>Alen_Al4_ctg01_-_Alen_Al4_ctg01g694t1	MATRRNGPNNPKDAAPVPTDKTQDKQARLLAEENPGHFSLVRALHLADFITELNGFCGVMSVFSSLRYCIQDDLHNYTNLYWALGFIPLGLFFDFMDGKVARWRKKASLMGQELDSLADLVSFGVSPAAAAFAMGIRTPLDHLLLSFFVLCGLTRLARFNVTVAMVPKDESGKSKYFEGTPIPMSLGIVQIMAFWVYKGWTLEQIPLGLWLEGTMFEFHPVVAMFILHGCLMVSKTIHIPKP
>Alen_Al4_ctg01_-_Alen_Al4_ctg01g695t1	MSSFRGTPRGGRGGFGGGSRGGFGGGSRGGRGGFGGGASFGPPDQVFEMGTFVHEVENEMFCESINTKIPYFNAPIYLENKTPIGKVDEICGPLNQVYFTIKPQEGIQAKSFKAGDKFYIGGDKLLPLDRFLPKPKPAPGAARVKKPASAGGRGGARGGRGRGAPRGRGGPPGRGGFSSRGGSFGGRGGGRGGGGFTPRGRGGFTPRGRGGY
>Alen_Al4_ctg01_-_Alen_Al4_ctg01g696t1	MAEAVKDTVNQVVEGVKDLAVSGEKKVEEKAPKAAKPKKEKKKGGDDGGRPLMLDPVPAFVDHRVKIFEKLKAKYDEEVAQKPREKITVTLGDGKLIEGESWVTSPADIARGISKSLFERTVIARLDHGTPEETLWDLERPLEKSCKLELLDFDHPEGKRVFWHSSAHILGEASERRFGCDLCIGPPIEDGFYYEMALPDKAAVEHSDHKPLETIVNSIVKEKQVFERLTLSKEDLLEMFKSNPYKQHIIKDKIPDGTSTTVYRNGPLIDLCRGPHVPHTGRIKQFKVMKNSASYFLGDANNDSLQRIYGVSFPDKDRMAEHLKFLEEAAKRDHRKIGKEQELFFFHEYSPGSCFFLPHGQIIYNTLQAFLREEYWNRGYQEVGSPNMYNSALWKISGH…
>Alen_Al4_ctg01_-_Alen_Al4_ctg01g697t1	MDKLNIQQKSRTARNRLAEAVSRGNGTGSLAVPPSTLAINDNASTTGVNEGFPGQSAARDFAVPEQTPVPQPVIEPPTSLESSIDAGKRVPVPPPSQDDIRTPQKQVTSSPLTPQRARSKSAPHRPLNQQRGSPQQQHSPYSRPSPGVRQASIGIRRMPSSVSLNQYAQATNPSSQRLSQPLDTLEEGRELGRTPSKSTDSTLTQPEPSRLRKVRSAIQTKVSFWNSPSSKEKGKSPEPFDLSGHGPEDAGMDYTSGMVDVLDTVDPEIATLTSLTNLQNSLFVPNLPFFNRRPTYNLRRAPSETASLEEINRILAPAYAAQSGADLQPPPRLQRTDTDGTVATLATIDSQLSDSRFAVLPHGTSLEGWSKRDKAEMNDHVRHMLHSKRSKFKRTMRGF…
>Alen_Al4_ctg01_-_Alen_Al4_ctg01g698t1	MLLSTLPVLATIATFSSSVIAAATAKPPAFFLAGDSTTAVQSAGGGGWGNGFIDTTLKNGATGKNFGHNGATTVSFRDGGDWDNVLAAVRASTANYSPYLTIQFGHNDGKSEKNITMGMLTANLVKFVEEARTAGATPILVTSVSRRKFSTSTGKVQESLADVTAAAKAAATKSQAAIIDLNAASTKYLNSIGSANAATYNLNPTDFTHMNAQGSVVFGNMVAVLIDAALPELKNYVVPVKEVADALAAGKYIFPAVKA
>Alen_Al4_ctg01_-_Alen_Al4_ctg01g699t1	MADLAAENTHPGSTTNSAAVSNAASRASTPGATTEKPPDDSSKFKTFLGILRKFIGVSDLAAVRFSLPAQLLEPRPNLAEYWHYLDRPDTFISIGDSNDDLGRLLGCLRFWFTKDLKYVKGKPCKPYNSTLGEFFRCNWKVEDTHPTMKTATSAPSSSANSVVGDGKTVTVSYLTEQTSHHPPVSAFYIDCPEKGISARGYDQLSAKFTGTSVRVVAGAHNLGIFITLKNRDNEEYQLTHPAAYLGGILRGSLSVSVADTCYITCPKTGLKVILEYQEEGWLGRSQNLVKGVVFKYDPKNDTTTKIKEVPDKEILARIEGSWQDKVYYTLGNKPFNKASEKHLIIDLNPLFPVPKTVPPMEEQLPNESLKFWEGVTNAIVGRQYNQATTLKTEIEEKQR…
>Alen_Al4_ctg01_-_Alen_Al4_ctg01g700t1	MADTATRLEACKAAASNYRSQLQTAATKDEALTLAIGAAENLMKALKLSSNADEKKQLKAQCGVLMDVADQIKKSKDWTPLSKQQPKNTKDAQIGQWAANVDVSASPGPAYEGTASPQSSTLYSTSAKAAPVDTQSASGNSPLSSVSFPSQTFFDTSFYRNDFQRSSMPLIDLSHNQSPSLCHHSWNTYADTKRKDRAQHHGGGGLDASISKATRRAPSPLAPSSSQAQDHTPDPLAAGVSASATPVAPKLGSSSHIHRLTEPISTRRRSRKEDIILLKASVVNGFKCPPWDRYPAPADFAPQNGQELFTDTHDLSLSPYQQQFFQGWVRARDAVPPPSLYPNGRDGIGPLMSSSRPIDLVQDAASDCSVVASLCAGVARAERGHDQMLQNKLYPFDKQ…
>Alen_Al4_ctg01_-_Alen_Al4_ctg01g701t1	MAGQSKVEVLPPWGNAVAGAAGAVIANTLVYPLDMIKTRLQVQVKRSKTSTGPNPADHEHYNGTLDAVQKVIANEGVSGLYAGMFGSLVGVASTNFAYFYWYTFVRSMYLSYQTVAGPPGTAIELSLGAVAGALAQLFTIPVAVVTTRQQTMSKHERKGMIATGMDVVNSEDGWTGLWRGLKASLVLVVNPSITYGAYQRLREVLYPGKTALKPHEAFLLGSLSKILATVVTQPLIVAKVGLQSKPPPARNGVPFKTFTEVMHYIIEHEGPWALIELQFILLFRYFRRVRAEKLQKLANAAAEKAGKVAPVFTR
>Alen_Al4_ctg01_-_Alen_Al4_ctg01g702t1	MPFIPPSLLPGDEQKERDTIARGLSMQSMTWVLEELRDGFEPILNGAHPTTYASAVTPDLVGCGCKVLRAYYKQKDPAKPDADKDVRVLPGQQGIITAMHPSGHFAKVLLQGARSKMRDCKLEFLTEELPVDILRTGGLSHDNKEWVTLVYLPPPKFYTFPVDSMSAQDSSLFQRAVKTLLQGISGSKLSWIPTTFYDLIGIDGEHIDAITSVIVNGAKNANTLDVLNQTEFSIGDILNAADRLDTNTDDDWGGVYVRPYYDGEWDNINDIVDALYTGRSKTFSKRAGNYSSGHATGRAHQKALDRALAAKQDLMFSVCDISAASKTDPRVYFVAEQVFMCLFQTYRTAVEHWAPVTQVEPNVNEIEAAENLKSWTRHFATQNLGTAAKDMIDIATRAA…
>Alen_Al4_ctg01_-_Alen_Al4_ctg01g703t1	MMGISHPPAKYWAKQYAWKRMTKWQDAVVEGLFLAGVTAPKAEVVLVVKEIASPKGRAELKEKPHSNVLYHPADRNTFMVFDNEPEIAEICRRFDRNLVVAAPEINDQAQWPRIYNQKDVDRPAIRTRWGPGVQGEFRPIYLGCLPYSDNAVEWYTVQPHGTDNEKTWKNLWAIPAFDQQGLQKFNFPHPDDSQFDESRDPQLFAWALVSLQRSIVAGVEIPDNQTGNWLHQYGRFLSFTSRRDNDFPEARRFVFDHSKNYTGTHLSLLSMSTWILASAVGSDLRKYAEQWDTAILALYEIRAALTRGQWPKDDKEQLSEWRKKLGKICEVWDTPEDVWTQHKDHDAMVQRSASPEL
>Alen_Al4_ctg01_-_Alen_Al4_ctg01g704t1	MPSKISEEIRFGDSVAPLVVSAALASDDDAFEDLPEDYTIFLDAPVTPPRRLTLLDYSPTLDKIDRRSVAGDVEEGAATPKRKRGEKKKGKKSKKSKKDKKDKKDKKDKKDLASEDDYDDDDDEEDEEEEDEEEEEEEEEDKENKKKKVSKKTTTYTSAPASAATSSRPVRASAKKALKDITNLYSVYGQD
>Alen_Al4_ctg01_-_Alen_Al4_ctg01g705t1	MFLSDSVNDDKKEGRPKKFYAPDYVFLIEHPATGEQYFFDLGIRKDLENLPPMIVKNTLPHFDCEPKSPAEILKEHGSAEQQPEKVKAVMFSHMHFDHVGDGAKAGFENAELWVGPTCCTYARPGYPVEEEAPTLSETLPTDGSRKIVEAFVPDELMKEAGDKRAGKVMDGLQKGLYNAVALKKAEWFGLGAFDRAFDVFGDGSAYLVDAPGHSAGHQMMLIRTTCGPSDDTFVLLAGDCFHHPALLKEPRRTARPPYSKGGMHTDPESALDTIYRTREFAEKENIWVVAAHDSSVGESIAAGVKEIEGLVAINDWREKKWKRSLHEKL
>Alen_Al4_ctg01_-_Alen_Al4_ctg01g706t1	MPDVVKLAQEAETNPRGIPKAPFVDRVEDYVTDRSEVETTINSFKEMISKYQFMQANTQRRAAGLKDKIPDIQKTLETVRFLKTRGGDAEPIETTFELNDTLFAKAEVPPTDEVYLWLGANVMLAYPIPEAVELLSSKLSTAKASLSTCEEDLDFLREQITTLEVAFARVYNWDVAQRRKDREAGESIEDKKGKSNG
>Alen_Al4_ctg01_-_Alen_Al4_ctg01g707t1	MNVLIFGDQTADQFPLLKKVATWRNNATLTTFLDRASVVLRDEVQKLPKTQRDQIPDFLTTWDLVNTYYSEGKKIPQLESCMVTLAQLAHYIGYYGENPTDLPNPANTRLVGLCTGSIAASVVASARSISELLPLATEAVRIAFRTGTCVGAAKDALEHPADAKESWSTIVTGISESAAKKALSAFHDERRIPASARAYVSAVSVMALTISGPPSTTKRLFQEIDAFRNNTRVPIPVYAPYHASHLHSQADIDRILDSEATRHLQQFRPLALIHSASSGKCQTATSTLELMRNALTEILLEPVRWDSLLGEVVSQVTASGSADCSVAAIGVTNIANSLASALKAGGQSHTAVRDHTSWVQTTDATRGRTQNDKIAIVGMSGRFPGAASPEALWELLEKG…
>Alen_Al4_ctg01_-_Alen_Al4_ctg01g708t1	MVFCTYCGQSFTRDEHLERHILTHTNVKPFKCFTCHMSFARRDLLQRHYTVHGRNQNNEEGLPIQGIIPKSAGRTPIACSNCAKTKTKCDKKFPCSRCAQRNLKCTLRPTRRASKNVNRVGVPVEVVSSGSSSDNGGNAEPQNTSAGNSPAREVQPPQANGQPSPQLLQQQPPQATNSIPQRQSQSPSAPQSRHSSVSQPVQPPVVPTPQEKQLHLPLSHTPPFFDQSPPNTILQPPTLLSPLPTPGNMASGFISSTPMSGYDDFVRSGGQSDPETSPFMMDPWSGMAMGADFDSMRIDPSLMMSMNMDISMGPPPEGILGMIPEMSPTQTFGPVQTPLQTPRMDETFSDLQIGSSASMFYPSNRHSSIADAGIPDLGAIVAAQDGWTVFRCTPPIPSS…
>Alen_Al4_ctg01_-_Alen_Al4_ctg01g709t1	MSAAPASWSLEGKVAVVTGSGRGIGKAMAIELGKRGAKVAVNYANAIEGAEAVVKEIKALGNGADAHAFKANVGNVEETSKLMDDVVAHFGKLDICCSNSGVVSFGHFADVEPEEFDRVFNINTRGQFFVAKEAYKRMEVGGRIILMGSITGQAKGVPKHAIYSGSKGAIETFTRCMAIDAGEKKVTVNCVAPGGIKTDMYHAVCREYIPGGDKLSDDQVDEYACTWSPHNRVGQPIDIARVVCFLASQDGDWVNGKVIGIDGAACM
>Alen_Al4_ctg01_-_Alen_Al4_ctg01g710t1	MTSGTVSSFVLLLLSSSAFAQQQAQYNQVLNVNGDMDLNSFVFPDRSKVETYSQKQQQIIVNQQQPAIPANQVTGSTGQPFVAITTQSMIISTNGATDLVGGQVEMAMTMQNLQSAAVQPSNTYVAMLSPDRQSWMIQETMRSVNTTDMTVRMVKRNQLDGEYMVVGRQTVETNTLVTPFGSGGSTQVAIQGTGLQENEFQDGFRMATRATQPMLMNVDVKDGVDSGMLAALQGQAPVNDYRYSVVTNLAGVTPNLNQQVTVVQMPINAVRIQKMMQAMGVPPTGQVAIAVAQRSVLQNPGGATGQLQGAGAPTQKRGLSRLNFRKDIAARQINTGTTNTGTGNTNTNNQGNTGGTPTNGNNPVATQLLLSPTFTPVQANAVLDQANMRIAVPVRQVDG…
>Alen_Al4_ctg01_-_Alen_Al4_ctg01g711t1	MLSARCLSRATVRASHAPQTCRNIATRPQRPQARAATHPYAQRRQQHFVRSLATVTALWAAASAFQYVNGEIVGEVHAEEQKDDDEVIKFEAPRRKPKSTDDNRNIISSQHLQVQRSWENPGVYAWGSNTGKTVAPDSDEKYIKTPRRIKFFDGKLLRDIKLDRNFGAAIDERGDLLQWGVDFSKEAKEPTKTLRGKNLTSLAISRDRIIALSSSGSVYSIPVSQTEQKEGPKPASTSWIPFWRGSNDVSYRTRTPENLAWSEKVVDVKSGLEHALLLTSAGRVYSLASGTQNFPAKGQLGIPGLTWESRPQGAFDVPHEITTLKGFPISKIATGDYHSLVCDSAGRAFSFGDNTSGQLGFPFNSEALSVDAPSLLPTQKLYAGTAQQGKITNVFAGGN…
>Alen_Al4_ctg01_-_Alen_Al4_ctg01g712t1	MEGESWYNSFVPRVVKKEEPPQQHRRRESLLRQPNESNADVERAEGIPEAVEDAPAKLNAPPPATVARRAKSYSDFYSVVRAHLKKEKALVKKKSHENIGSELDFAAWYGGVNEELLEASHDDYKAYQTQLHLTSNHLGNMIVDTNSTLDTLSSLSDSFKTVEAQTTAFREQCEGLISDQKRITKLAEDMEQNLRYYIYLEPTTKRLNAPGASKIVRGKEFTDMLANLDSCLEYMQAHTKHREAETYRSRYRLLLTRALTLIRVHFTEALREIAADVAKRIADRQLNDTTMSALLYAKFRVGAPELKKLGLEIQKRAVLPAGAAPGAEAEYQSLMNELYQSYSTTRGRLILPIVAKKINEIAQAPSTSKDLVAFARSSISYIRGICIDEHNLWREWFDG…
>Alen_Al4_ctg01_-_Alen_Al4_ctg01g713t1	MSSTSTTEAPDDEEPLPKKKKATPKAKPAPKTKPTKAVKKTKKITSPSPAAATPVAKLTSSFEAQVRRLIITSINDTINSAIKETIRDAVDTAITNTLQSALLPCLDLVEPLMNYTRAHSVLDGPQHDDVESVQETVREAVAKLKTKWSLDVDEVKFGAVPVPPHLKSYRFARAWGMGGGHFVGWLDERGDDKRD
>Alen_Al4_ctg01_-_Alen_Al4_ctg01g714t1	MAANDSLQFEEPAHPHISLPTSSSTDSTGSTDSRASSNGSVTTSAPALERQSSVSKVASLAKNLVKSPQEEKEHRELDKTLDQAVKKGPKEVDVGMMEA
>Alen_Al4_ctg01_-_Alen_Al4_ctg01g715t1	MEFQKGERVFLNFETGGVEKAEQETAPEPTGIPAFDFVGDILERNPASAAPPVAPSFKTNTNGFPAHKKRTPRVSAFKQQRATKEQQAAAAPKAQDASSLYNAAPPPRAKFEPDEERRAIDEENQQRLDAMSEEEIEEERRELMENLSPELIQRLLMRSNIDDGSNEVQRWPEDEPVESEPKPAPELRHFEQESELATKPSTSKKVSFAAPATEDDAPTHTTKTAPHTATEEQAHTHAEEATGSLHFPATPQPPDLDPNDPDFLKNMHAKYFPSLAYNPSTLSWMTPIDPSDKSSPYHPSQTALNASELRFDFKGTLLAPSIARDIPSDRGLHHHADAPEAAGYTIPELAVTARSAVPAQRCMAYQTLGRILYRLGQGEYGVEQPRQETDGPVRVAQDP…
>Alen_Al4_ctg01_-_Alen_Al4_ctg01g716t1	MSDTTPQDKSSIADPGKNPSHDGPTASPATNGSAGKTEHSSKVQRNDIVIGFDYKTERSQDGSPDRKRDLPEPHPVEEPEPKKVKRSSTSPNGKIELTPETFPGSFTSPHDTNKETWQGFCDIESEPAYFATILRDMGIQGVNVREVFAMEPWFLETLPQPTYGLILLYRYRDNGSSDQSTETSHPLWFANQLPAQNSCATLAMINIIMNSADVEIGDHLQQFKDFTKDFTPYQRGEALASFDFVKKIHNSFAKKMDMLEADKHLSYKVKKAERLPKDIKARRKSTDSAATDDSAESYEDNAHHFIAYIPAGNEVWMLDGFNAQPISVARFDTEKGETWLSMAAESILSIMADEGHEYTSFAITQSPLLPLREQACLAIATLKHIELRLDHISTDWRSL…
>Alen_Al4_ctg01_-_Alen_Al4_ctg01g717t1	MHAFSIVTLGIFVAGYSTARWDLTTRFYELAIFAWDHGVVTRAAKGFAILSLFFFLLVLPFARLATEETDLHPRVGTGGISAREQLKHAPNGRQSGVLVGFRNSELDVFVVSILQEVELRNVENALVVGTLLRHSPHDVKELLARCGHTSLRVLGEVNPKSPPDHFQENLLTAYTSPSNRLPQWYCPADTISTVQLVIYDRPNPMRMQYLSLTPIALALGDKRISEKWDTAFEKHEAEEEQRKRKKAMLVEKLKLHKVVARPPTQKEAALPTLIEQVNCSSELDALLQQNIGMIGRRMKRALSVSERVVESANNLWDYIYASLWYFLTVWLWPIAAQIFILVLMAHRIAGEYILRFLDWRLSPDAPALKDISATAQQIDIRLQQFCYWPIQYLTLRKRK…
>Alen_Al4_ctg01_-_Alen_Al4_ctg01g718t1	MVSFTFTSAFVAAAMMMMASAQETSDAFWGTVTTPSAIASPTTTLPASAMETIGCFETGTPLSNYGFYEYQSPGNCQLVCIENGKKVLGLANGVDCWCGDKIPAKEWQVPNSTCGTTCGGTTDELCGGANKLWVILTGNTRNKVEQYSIPADSSSSAKKSSTATSASSTTAASASASPSETASSDSESKPNTAGIAAGVVVGVVGLAAIIGGVWFFLRRRRQHQAEEDYRRNAAGVNDFINGGKTSASSVNDSRIDPSFMDRRQSNGSIADNEDYSRRILKVTNV
>Alen_Al4_ctg01_-_Alen_Al4_ctg01g719t1	MRRPQIACQRAVQSLQSPAPQHIWVPDDVLLLAVHRFFHGTCPHQKRHGSNVPGPLEARRRAAKRRMTASAGFYPQDSFPTSFSLGALFGYRSQPQNSWKYEPPSLPKDAQPRDAYSLSSPAWDSAQYGDLLPRGQANDLSSIDRDVPRSSTQQRTTQHLINTLGQDVNLEAVSPDSSHSRAIEHTLSSDDELETCLSSFKARVAVEGHVRSALLLKTSFRECLPPSPLAWKYYVAVLQHMLQLECNPAPVLQCLLENDGYLLRSVALLQSAEDCARFLGCLESIATAKHARIISLVRRIYGLMAHSAAEGERSTTEAYDAVLLRLIKYTGNSASSRRLNESSSVTRLLYALAAKLRKSAANNLLLSHLSQSGHDKKAIISTIYRVAEVPELFASAERA…
>Alen_Al4_ctg01_-_Alen_Al4_ctg01g720t1	MERNTSPPEPTIEQLRHVALNFPIIDNHAHNLILPTHADSIPFESITSEAQGRALRDTFKSLAHLRAAKQLRELYELDDKANWDDILEQREEWLRSDPERFTQRCFEGVSALLIDDSLAGPGKVHPYDWHDRYTDAPCKRIVRIETVAERLMEAIVKDAEEDDLGKSSFYTETWVSFMDDFEREIQEAIDNPEVVGFKTVICYRTGLDIEEDYERAAKAVGYPFERYVKSCVRKRSFRIERKPLNDYLVLRTLEILSDGLSRSESFSKPLQLHTGLGDNDIDLSLSNPAFLQPLIENYTSVPFVILHSAYPYTREAGYLATVYKHVYLDIGEVFPMVSRDGQRAILRQALELVPGSKLLYSSDGHWFPETFWLANKQFREVWLELLVEYVEKTDLTPQH…
>Alen_Al4_ctg01_-_Alen_Al4_ctg01g721t1	MRGLIAATALLAGVHAAVDPIVIKGSKFFYKNNGTQFFMKGVAYQQEVNSNTTSADADDINITDPLADSTACKRDIEYLKKLKTNTIRVYAIDPKKDHKDCMNALADAGIYVVADLSEPGNSINRDDAEWTTTLYSRYTSVIDELMQYDNTLGFFAGNEVSNQPNNTLASAFVKAAVRDSKAYIKSKNYRSVGVGYATNDDADIRENLANFFDCGNSDEAIDFWGYNIYSWCGDSSFKESGFDVRTKEFEKYNVPVFFAEYGCNTPRPRLFTEVGALYGDEMTGVWSGGIVYMYFEEANEFGLATVKDGKVTTNKDFDNLSKEIAKATPSGVKMADYKPSNTAAASCPKVTAGTWEAESSPLPPTANAQLCSCMMDTLSCVVADKTDEDDFGDMFGFVC…
>Alen_Al4_ctg01_-_Alen_Al4_ctg01g722t1	MSGHPQGGHYDDGYGHSQGQAQPQGQDSYYHDDQQYGQYHDDARGQQGHYQQNGNDAYYDEHRGYYDGQQGGQYQQNGGYYDDHHGQQQGYQDEYYNDQYYDQGGAQEGYAPNAQGGQPRRRQHDSEEDSETFSDFTMRSDMARATDMDYYGRGDERYNSYGGGEGNRGYRPPSSQVSYGGNRSSGASTPIYGMDYSNALPAGQRSREPYPAWTAEAQIPCTKEEIEDIFLDLTAKFGFQRDSMRNMYDHFMTLLDSRASRMSPNQALLSLHADYIGGENANFRRWYFAAHLDLDDAVGFANMNLGKASRRTRKARKAAKKKAGENPGNEAETLEAYEGDNSLEAAEYRWKTRMNRMSQHDRVRQIALYLLCWGEANQVRFMPELLCFIFKCADDYLNS…
>Alen_Al4_ctg01_-_Alen_Al4_ctg01g723t1	MDLHEVQNATVRFLNDANAYLERIPGSSIAVRYIKSSYQNDPVRSAVELFLFLFAVRYLLAPKYSTQKKVHLTDAEIDELVEDWTPEPLVAAPTPLEELDNEKRPVIVGPTGPKSKLSNGRTVTNLASFNFYNFVANETLKEKAIQTLRTYGVGPCGPPGFYGTQDVHMKTEQDVAAHLGVPACIIYAQSFSTISSVIPSFCKRGDIIVADNAVNFPVRKGIQISRSTVRWYEHNNMEDLEKVLQRVIKEQAGKPLTRRFIITEGLFENMGDVVDLPKLIELKLKYKFRLILDESWSYGVLGRTGRGVTEAQNVDATEVDMIVGSLSGPLCAAGGFCAGNEEVVEHQRISSASYTYSAALPALLSTTASETIALLQEQPEILTSLRERIEAMRAQLDPR…
>Alen_Al4_ctg01_-_Alen_Al4_ctg01g724t1	MARAGHSGTVVGSAVVVREKYYWPDLQLNVWTIVMLATAGTILGVNAQFMQIQDRMGLGTPWIMPYGVTVGALALLFIIIEIVYIMQRKLLPGTMMLLSFILLVLFIAGIIGTAIQLFAGPNINNQCNTYVFNDNSSGPNANTLAFLQQRNICQCWQAVFAFWIVGSVFLVWMMIMASQVNSNQYRD
>Alen_Al4_ctg01_-_Alen_Al4_ctg01g725t1	MSDANELMVQAATIGVDGLSHFNGGTSISGGSWLNNQNKLEQIHKLRVMALGNAKILYGSEKFKYYDVVIAYSETDAKFAALLVCSFNEASKILRKEVAVCPIAAARAIVHGLHTDSGLLFSKYNVGDQLFGQQGGTPHGGEFGLYEWKRAVNDPTQDQDDTSSLARGGLVAAPTGPRADRRPYKRTRCDNDRGDYWDRDCELRESEGGLQYDN
>Alen_Al4_ctg01_-_Alen_Al4_ctg01g726t1	MMRMKPPSIFNNHTQNSIMDSPSKRRKKNDGSSKPIRKLDFFFAKQTAKAAAAGTDATKNTTEANSPQVIDPSNLTDEEYARKLQEEWNNEAREQPQKEEELSSSNELYRDPSPSATIGAKSGNVKKAENPVPDEVSIPVFESAAPKQKTNTLSLQSTATEEDTITANIPFDQSPLEFDPSKYIPDLQRHWTADGGRATYALLTRCFILINSTASRIKIVDTLVNLLRTIIESDPASLLPAVWLATNSISPPYIDLELGLGGSAISKALKKVCGLDNAGLRTLNNKYGDAGDVAFEAKKRQSFTLRKPKPLTIKSVFDSLVKIANSKGNGSVEVKQRIVERLIQDARGAEESRYIVRTLVQHLRIGAVKTTMLIALSRAFLLSKPPNAEFETQDPKDFA…
>Alen_Al4_ctg01_-_Alen_Al4_ctg01g727t1	MDIFIQDVPGDVNHVQLQMFLKDKLVDFGILAYDIFKKPGNQWALLTVAREENGERFIRHFQTRAKLVLKGRYLRCKKSNKKGQPEALKVMSLLNKEENMTKKPLKPSLPTSELSQPHFSFLSMTTGVWDYDHLGKLVFDQKYQDHRRGTIIFGKTALVIYLESRANANTEIDSNCRIDIPYGILEHTIPSNEAGGQGALTLTLKSPPKIYRIVSTDSLHLYTNTEPSMMAQMPNMNALFLDVSRFQRTPSLHRLCALQRRFDKSAALCMVYKLQFPKLQTMRYAWNFIRDFAVPDMDLWRTTISQKRTQSIEKDYQALEAALADVTNAHINFAIAYQMMALVLEGTVSPANMLELIPGVCDLAQRYGSTKTAAGVSNLAQQIPTPTPHVNGNNYSTKA…
>Alen_Al4_ctg01_-_Alen_Al4_ctg01g728t1	MATLLRRAARPTAFTEIGRNGIRSLSGQFGFPTHYAPQQQQQHHHHQQQQQHAPRAAALPIPYVTETVGGGWKTSDIFSRLLQERIICLNGEVEESMSAMIVAQLLFLEADNPEKPISLYINSPGGSVSAGLAIYDTMNYIRSPVSTICMGQAASMGSLLLCGGKAGQRYILPHARVMIHQPSGGYSGKASDIADHAKEILRVRERLNKIYQNHLTKKRSLEEIEKFMVGDYFMDAQEAVDFGIVDKILERREDVGKE
>Alen_Al4_ctg01_-_Alen_Al4_ctg01g729t1	MPGQWTRRLGSCSSQARGLSTAQRQSHSHATPIQPLQGDQLGPTQQHGHRTFRTRRDGKKELPLPPLLDPVVLKERSRHEQKKEKPRFADFTPFQRRLWENPFAHALASPVRECRATQAFAPEALLTALHMRPHPTTGDPWLLPVSLTTKEKQLGPPLRFLTRHLVASQLGRKKGWEKALYARIMDKLHPSDFAKTVWREDMPALLLDLLRNRLVDRLSWHFSFRGRLIPVASPHTHHTAPIDDASTVLVLGSLRTRADDCQARLEAITAELEKWATYFGQHFGARLDPHAAPEVTHHAPAWYVQPLVPRMQPRLQFPELDFKTTVWRGRKLAVYSLTDLLGPDKARELIEGPKSQYAGQTCVVMKRAKHNVPVEILLMQLQAYLARPGV
>Alen_Al4_ctg01_-_Alen_Al4_ctg01g730t1	MSSGNPFRASLAPHPAPSSSVPQASITTPETGRPEAGAQDDDVLAHAAVSPPPRTKKHVRIESTATAIPPQPDVPSPDDSAHTSFAPQHPSGQYAGPSPAAPSAGYANSSPGAYTREPGRSYAMAAPHPMESVSNGPAADFPALSPSAVPANPFAKTLASMEPQQRASGEDRAPAEGATPGNNRASLDVESFKNMLLTGQPYPRQTSQSSQNTQSPQLPTAPSSASAAVVESGSSTDASSISRQSLLEAAHEAPLESPRTSHEMARSEEDEVPSLTPERTRSKRKPPPAPAHRHGKLVSPRQPQTVSFDSFAATEVAPSPVTRPRNTSDTSKPLPPTPVLSSPPLHVDTPEKGRDNTSPPMERLDESLSRSNSLQKKRAPPPVPLARRQSQLRHSSTEN…
>Alen_Al4_ctg01_-_Alen_Al4_ctg01g731t1	MSSTSTKKVVRTYSRQAKRPLYDEQPPTKRRRVQNDRVEATPQLPSKPSSPTRITSTPLSSSPQRSLPTFSDAPTRSSPPSSPALESSPPPDRKRRPVFSLFKRKLKHSVSAPEVLSERSDNAQTVPNPPPARKKRMVQMQLDLVGQHRKACRTCGMEYIPSNAEDVALHRKFHAMNFGGVDCTKAMVARLQQKQVWSGGEASFIAVVGRRDALALRNKASDVLKVVNTELAAVPITDEELWSQTLLSTGAEPSTEDAAVPEKCDRFKVYLYIQGQKCVAACLAERIQEAYTVLAQDKESQQPAQTAAETRSSSISVSTTADIVLLGISRIWVSAQFRKQGLARRLLDCTRNDFMYGLKIEKRLTAFSQPTESGGKLARKYFGCEAGWHVYME
>Alen_Al4_ctg01_-_Alen_Al4_ctg01g732t1	MAQPTPAHPATMQAQLATQSNPTIPTATTATSPIPQPIFTTPRLLVRPLHPQDAPSMAQHGNNLNVTKYMSLGFPSPYTLESAQGWITMNQTAPIYNWGICLASAPETVIGGIGMKPGADVQGHAAEAGFWIGEAFWGKGLTSEVLAALTEWCFTAEEAKLAVGGRRWSRLFGTVFAGNVGSMRCFEKCGYGKEGVLKGAVEKNGAASDLHVFGLVKGDWEAKRG
>Alen_Al4_ctg01_-_Alen_Al4_ctg01g733t1	MQAAAQTQTEVDSKDRFFRYFRHEVTALQEQMERLNSIATGGGERNDAVEHCLAGIDRLSHEVKDASSYIPAYDQRTYSEAIKALAEKLQNIRQTFNPPKKFAFKTRKNASAISISDAAELAASQRLRAPVITSDTSNTNSSFAPTPLDRLSPGERKEQEVALGPQNGTAVASDGIDDTNGGIRRPSFSSATSINISNHSGIHIIPPTSASSATSSGTLSNLNDCVIDLSAPTSTSPFSALYLKNIQNSVVICGTVAGATHITDIRDTKIFAGTRQFRMHGAKNVDVYLHCASRPIIEDCEGVRFAPLPEVYITDEMRQVKNQWDQIDDFKWLKAEQSPNWSILPEGERSVPAQKP
>Alen_Al4_ctg01_-_Alen_Al4_ctg01g734t1	MLLVHVESSQDEIATAIPPAMADQQPTYHPRDALSNTGSSMLQTTAIGAVIAGVQNTLRKQNVGAMGVLTKSGGTIALFAAAGGAYQFTLDATANLQQKDDCWNEAYAGFAAGATTGIYKRSLPFMLGAGAAFSVAMTAFRYTSGMRGTASGELDDEEVERREAMKKMRRRPLSETLEQLGEGRGIYGPGYEERRRQRLMDKYGIDVKAAQA
>Alen_Al4_ctg01_-_Alen_Al4_ctg01g735t1	MAPGKTAPRLLQDLLTYDPRREDRAGRNLLTSAPPEHNPSRDGIPAVPRGNCRHALVRKDEQCLLPPPGERPRHNTVYKVASYCPQCRYHIDVIVEFKGQGFLEGVCGKQNWDFPLHHFVYEGEDGANSNGIGGQHAARSFPFRCTADACPTTVRIDLKPPRFTDHDLELMMNKAQLRRRFEKSRELVDAREGETMARSVDAPDYLDTFLRDSLNPAPGKSRVPLLNRKFAKTFWRDCDSILKRLGFEHAIEVNEDEDGASVEAWYLPKPEDQHDPLQSTLRTTIEDARYELNSIILAVPESERSNVRHQPMYPVPSQGDIEQALACHDYEKTSSRTRNEVNSQEDHPYYAGLGAVSDFADLLIYFAYRRQSAVDKINAPYYLTCLEDLAKGRQSEALQ…
>Alen_Al4_ctg01_-_Alen_Al4_ctg01g736t1	MIRTSCAWARASSRRTTQNVHTYPRNPQHATGNTTPLNLVPQPVSPAHILRRHNATKPPTGQKAPVTATTIPGPSWLWLEPVIEPFRAYGRVQQRKPYVTQLASSLVIYFVGDLVAQSIAAPEEKDAPEEEEERGWVQQWSEDRDWARTGRALIIGGISSIPSYKWFLWLSLNFNYSSKILSLTTKVVVNQILFTPLFNSYFFGMQTLLAGASLDECVERIKNTVPTSWINSCKLWPVVTAFSFTYIPIQYRSIFGGVIAIGWQTYLSLLNQRAAAQEHLVHPAGQEVVTEAVATTKHNVVDEREENGNEKQKCAA
>Alen_Al4_ctg01_-_Alen_Al4_ctg01g737t1	MASAAQQRVDEESYSSRQQRSELKKMADLPSELEKELDDLDAQFWIPGEKLKEIVKRFREELDDGLAKHEQNIAMHQTWVHRLPSGNEKGTFLTLDLGGTNLRVCEITLHGHEKEGEEKTELEQEQYKLPEELKKGDADGLFGFIAQELEDFVKSKGLDKKYSKGKPMPLGFTFSYPATQARIDHAVLKTWTKGFDISGVEGQDVARLLREKTEERNLPIEIICVINDTVGAMVASAYNDSKTIIGAIFGTGCNAAYMASLSDIRKIKPSDRDTIERQYGEKSKMAINCEYGAFDNAHRVLPWTKYDQQIDADSPRPGEQAFEKLSAGLYLGEIYRIIVLDLAERGLVFKNQDISKLKESYSIDTGFLSQVEDDESPNFSKSRALFKDSLNLQPSDIEI…
>Alen_Al4_ctg01_-_Alen_Al4_ctg01g738t1	MKTILPYPSNLDLHSSTMPNYAQFLDQTPLTSAPLIYINGLPSVGKTTVARELIRLLGADNAVLPESHAPIHPVAAKYACSDSEYQEEGKAERARCFDTYVKNEEMRDSVAVFTECRSNVGLDAEVAREFQDIAVEARRPFIPILLVCDIEEHLRRVGTRGQKESSTTEPTSQDMVRHKRETEELYEFDIDNELILDITHVRPGTAAKVIVQWVANREWRRRHRDMSRRC
>Alen_Al4_ctg01_-_Alen_Al4_ctg01g739t1	MTATACVAPVTVTVTETVCGTPGVPVHTPPVAPSYEAPPPPPAPVTSVESTATAPLSGPPSEPATVIPPAPPAETGVPSVGVPPVVPSSGVIPSSGVAPSSSVKLSTASVPGTTTAPSSTAAVTHPSASTSIPETVSTAGAVLPTPYFGLGSLVAAGAVFNAAMAVIV
>Alen_Al4_ctg01_-_Alen_Al4_ctg01g740t1	MKAFHLAALFGGAASAIQPLVGRDDGTTTTVIYTTSTYTITKCAASVTNCPVASATEVFTSTTVMSVTTTICPVTSTPGLPPPGSGYVPSSVLSSVFPTNSPGTTGTLSDAVPTSYPPTVSVPSSAYLPPVQSSGLPIDPSRSIDFSVSLISPNPSVPVTDTDPIPTSILSDPSDPSSIYTPPAQTSPQPTGPSGSDTVVVPRPSPSGSASLPGSLTDSIPTSFPPGVSAPASSNGYVPPQPSTIVGPSPSLPMTGTNTPTSGVMPSSGYGQSSASSNTATDAVPTSGYPVSSANPSSGVYSPSVSSNTDAVPTSGYPGSSAVPSGSILPSVPSYTATDAVPTSGSSGSSGAPSSGIYSPSLPSNTNTDAVPTSGYLVSSSTGPAGTNTDYVPTFSGPG…
>Alen_Al4_ctg01_-_Alen_Al4_ctg01g741t1	MIHSSKLSPHLDGPVILDGALATYLETLGADISGALWSADILLQNPSLIKQTHLDYYRAGAQVAITASYQASLAGLNKHLKLDDEQGKAVVRKSVELAQEARDEWIEEHVKSLSELEKLGVSFNRSSVAEYRQSTRNRLFVAGSVGPYGAFLADGSEYRGDYSLAKQEMKAFHRGRIQALVEAGVDVLACETIPSLGETEALLELLSEEFKETEAWFAFTLRDAEHISDGTPLTRIAALFDNAPQVIAVGFNCVPDDIGLAALKVLKPLQEGKKWKMIVYPNSGEQWNAAAREWEGQRTEGGQLAVKTKQWADAGAVLVGGCCRTTPADITVMREVLQPKKEGEGVLESDQS
>Alen_Al4_ctg01_-_Alen_Al4_ctg01g742t1	MSTEIQNPDAMETDAPSPTQPSDEQAPAASQQTYNQIAASHIEALNKLNSNLPDILALIAAALSQLTNNPIQSEPREDSPQSRNMDTLAFSNAIKSFMQDFRATLIDQINDLERYKVIPATMPKFTALPSAMPGVGGAQQQQSQAAVVQDPDVGVKNGGYGDFDVGVLNARVAAGQVGEDDTLDRVKAVLDALLERSGQKTDGEEMAVDG
>Alen_Al4_ctg01_-_Alen_Al4_ctg01g743t1	MSGPPGPGPARAMSVGTNGPPSAGLPPHSMTPQQNAGPPPPSTSGPQSQQNLNQIVLEYLSKKGYVRTEAMLRKESDTQPNGQPLVSGSTETGGAKYTKSFELLRKYTEDNLDLYRPELRKLLWPVFVYSFMDLVREYFTKDAETFFATYQNQFERDHGDEIKTLRQVRLPSHLTESNIAKLYTENKYRLTLTTMPFYNLIQFLESKMFEGGQALMDIIREHLNIVTVDRTATAEKSIAAILAGGQGEDELPAEDEGIPGHNPGHPLTSRHDPEADAARIRLQLGPYPQDQDLQDDVRATLQDEDAKNAPKPGQSSLVDEYEQRIKREPTEDGPSRDTVPLPPSLARDVSMEVAKIMEYRDRYKMEGRTGGVGPAVSVTMYTFHNTYDSINCLEFSGDN…
>Alen_Al4_ctg01_-_Alen_Al4_ctg01g744t1	MEAFNRDNGQIYKETVSSRVRSMVPTWKKHARGKPVDPQSYRSKTQGSSTLRDIALRSCCWNVELFLPEALEHSGWHYAGMIYRHLKATDTLTFSAWTLFQQAYPNQFELNHAFRVSHHDSITSWSSIVKSLSVLDSSVLTRFCAYGMDLDLSQFMSLVDIPSLAALIQINHSRYRSDNRTMSDFSIRDWCRAVYEKKAFQKLKLLLVPSMSDALLRHLVGFPALRLVGVSRRCTGRTGALKAYGQWIHPGSVDEAKYTETICGSQHSIAEKTERLYRYAEELPPSERGVDNPVTLSLTCAAAEPALHNESISWFIRDPAASETQPQWPQDAKTVQDGSGPATKKRKVRQTKQQDVASLLGSFG
>Alen_Al4_ctg01_-_Alen_Al4_ctg01g745t1	MSTDIQNLKSFDPFAEAEDAGGEIKVGNQQNYIHIRIQQRNGRKTLTTVQGLPKKFDQKKILKVIKKQFACNGTVVADTEMGEVIQLQGDQRKDVQDFLTNKKDGLGLDVKTIKVHGF
>Alen_Al4_ctg01_-_Alen_Al4_ctg01g746t1	MHLSTVILSVYCGLAAAGNPHPWMYGVPDYPDLDMEEVMTQAGVELLSEAASNSTSTASNATLSSNTTASAGQEPCAAISSAIAAAPPGARKVVPAELGMKCLMSVPLDKDGNVKLIDDVKLFVKWQSNIAYLKDPPTNYTEKPVDVMGELDTMQKGLSSGTFKTEYDFQMAMMSMFNRAYDNHFAYQPDILASAMQFQRPPGTELVSVSSDGKALPEVYTYQDIRKANNDSSFKPSPVKMINGMSAMTYLQNASAQSDFHDADTRWNALFPSQALIASGTVFLGSFRTGQYQGPNTTMEFANGTMYNQMNVAVVFGNFTGVNSGQAFFKQFCTGPKPVTATEQPASTPAASKTSSTPTATPTPSMIGYPKAVILNSNLAIGGYYINGTGYEDVAVLSL…
>Alen_Al4_ctg01_-_Alen_Al4_ctg01g747t1	MKFSAVLAVAAASQLASAHTTVWNILVNGKDAGVGNTQGGYIDSPPNNNPVTDVTSSAMTCNAPGVKAAKSITVKGGDKIAFQWHHDNNQASDDIIASSHKGPIVVYASKAGSSYSWTKIWEDGYTNGKWAVEKLLAGSYTGKAGQHDLTLPNLASGEYVLRPEINALHEGNRQGGAQFYMECVHIKVEGSGTAVLPAGVSFPGAYKATDAGVLFDIYSGFSSYPIPGPKVWNGASSGSAPATPVTTKAPAAPVKTTAAAKPTTTKAPAAPAKTTLATIAKPAPTKAAGAAGSVAKWAQCGGNGYTGATACVSGSTCTKQNDYYSQCL
>Alen_Al4_ctg01_-_Alen_Al4_ctg01g748t1	MPSASYAARQPPAEKGEKPVHVLVTGFGSFLEKYPKNSSWEIASTLPALIPASPDNPAPIQIRVHHEPIRVAYRTVADLVPKLLPPEKTTSPAPDIILHIGLAASRNFYAIEQGAHGRGYARTADVDGALFQDTEAAKLFPSDCFPSPLKTGFDTGDVLARWRAHLGFSNPDGSAEIEQLPDVRVNPDAGNFLCGFIYYNSLARYHELNRRDAGGIPVAFMHVPDLTGSEEKLIEGWKVAVALIKALVESRRTVGLGGGSFGGSAKQEDDSKNNTST
>Alen_Al4_ctg01_-_Alen_Al4_ctg01g749t1	MASTDSPKKNYNIAIVGGGISGLTLAITLLRYDIPITVYEAAPHFGEIGAGVYLGPNAGRAMKLMSPKIHDAFNKVKTGNQWKEKEDSWFTIRVGDARKADKDGHVKPGKKVGDALFDVPMEAGGDRGGVYRAAFLDELVKDVPDSVAQFGKRLVDLSNANDNSGDMVLHFADGTTAQHSAVIGCDGIKSKTRPWLLGKDDPASDAHGHAGRRVAQNSSMFLGYHGHILTFPVQKGKTMNVVAFNSSKTWDNDKWVVTTSKEQMDADFADWGPDVQKIVGAMEKPDIWALFMHPPCKTYYKGRLCLLGDAAHATTPHQGAGAGMCIEDSYILANLINEANSVNDLERVFHAFDQVRRERTQKNVTTSKEAGMLYDFELYGDDLDKIEESYLSRMQWIWE…
>Alen_Al4_ctg01_-_Alen_Al4_ctg01g750t1	MSEVPTFQSAPGPSSFDHGINYEAAIDWVKVWTTLANIEHHIRDLCAKERKSYLDMLYEARVYRTSERPQHMQKLLDDDHTMNGILAMLQEAADVTKHSTPDQSISMAWQARYVLVKLHTTRMRYDADAYNAGFPLAADADFNKRLDTIVQWLAIELVNVLTELDALLPGMRYEEIYTLEGPDHDIATVGTLLPDSELRSRQDEVLQTDVLPENWERDHRIRCVLCLENYTTYDPAFQLACNHIVGRTCMSTWLNSTNAQATSCPHCMRVLCPPRTRTMISPTAEQIARANTIRTHRDKVGNIASVALRVVLKAYGLVRAQTVAQNVVDVVNAGLVRNGVQFRLLSRYVENLDKLVIGVRRWEE
>Alen_Al4_ctg01_-_Alen_Al4_ctg01g751t1	MSDKEYPPVKQGTTQTDEEKKNVDVVKEYMRLAYSPKENRGRSTVQHLCHDDAYFIAPTTFPDCKSPQDYAESHSKVMACVSDLHIDSYDVIFAKGGHVCLRYSASGSHNGEPHNGIEATGNKAAWHAAAIFEVEHGKIKGWINEWDKLHMWKQLGWMKGDEYA
>Alen_Al4_ctg01_-_Alen_Al4_ctg01g752t1	MSGAATPHAPASARASLPPTGVATPALQAPASASPGLPPPTTFDILPDLHKLLKRLLDTAPTPASAQTSAGADGPLDIQHVATAATDIRLKMQRAQRAVMALPELDRTCEDQEEEIEDLEARIASLKASLRELGRPTDTAEDQDQRMTG
>Alen_Al4_ctg01_-_Alen_Al4_ctg01g753t1	MVQVDQKAVLIVIDGWGVATEKARKDGDAILAADTPTMDDFAKSGSKTAQGYTELEASSLAVGLPEGLMGNSEVGHLNIGAGRVVWQDSVRIGQTIKNDKLGENENVKKSFQNAIDGNGRLHFCGLVSDGGVHSHIDHLVALLKVAKKMGVPKVFIHFFGDGRDTDPKSSVGYMTDLLKATKEIGTGEIATIVGRYFIMDRDKRWDRVEIGMKGLVTGEGEESSDPVATIKERYEKGENDEFLKPIIVGGKERRIQDKDTVFFFNYRSDRVREITQLLGDVDRSPKADFPYPADIHLTTMTSYNPKYTFPVAFPPQRMDDVLAETLGKQGVKQCHVAETEKYAHVTFFFNGGVEKQFDNEEREMVPSPKVATYDLQPTMSAMAVAEKLCERIQTGKFEF…
>Alen_Al4_ctg01_-_Alen_Al4_ctg01g754t1	MASNGASTPQSQAQVQPCRYKTGKTLGAGSYSVVKECVHIDTGRYYAAKVINKRLMAGREHMVRNEIAVLKRVSMGHRNILTLVDYFETMNNLYLVTDLALGGELFDRICRKGNYYESDAADLIRATLSAVAYLHDHGIVHRDLKPENLLFRTPEDNADLLIADFGLSRIMDEEQFHVLTTTCGTPGYMAPEIFRKTGHGKPVDIWAIGVITYFLLCGYTPFDRDSNLEEMQAILVADYSFTPLEYWRGVSLTAREFIRRCLTVDPAARMTSHEALSHPWIADLGTKQAEGEEDLLPTVKKNFNARRTLHAAIDTIRAINQLRAGGAAGMMDGIKAHEPRRGAPPAPKFPQPAEEGSDPMEIDHVDSRGNGHGQTEAMIKEQERRIRETQQGLWSKR
>Alen_Al4_ctg01_-_Alen_Al4_ctg01g755t1	MSELQSFLRRSLNSLQPELSAPTQAHMTIPIGMVRNVRQSFEDIISAHHYEPDKIYINRALRNTAEFIHQNRTYIEQLRLAENATLFSLPEHLVEFLRHHDDLHRVAIRNRLAANRAVVSPHMDVLVQVNHRLRNIRTFYYINLVENTGSQTEHLRLIHDPLLKEEFSECTASLQDEIVHQLTHAHHLLPSLAKDIELENIGPDHDVSDHGHQVPHTTTPIHPDARDHSQRCCICLEPYTTITHPAFRITACKHIMGEPCLAQWLNGTTRNANLCPHCRTPLCQRRDRQPAGMTPAESAQQRAFANRVRCAISAIRDMEKLKEDLCGSDAADAYIVNTMEDLNYRLFEDDVEFCVGRRGMEWEVGRFSWH
>Alen_Al4_ctg01_-_Alen_Al4_ctg01g756t1	MIQAAKILEQRSHLVPGKLRITEHFFQVPRDYTNPSAGNIQLFARSALKAEKPADYSPIGTPDPKKVQLPWLVYLQGGPGFECRSPQDVSWVPTILDKGYRVLMLDQRGTGLSTAISQSSLQLRGDEKVQAEYMKTFRADSIVKDCEAVRKALTDDYPEDKKKWSIMGQSFGGFCATTYLSFYPEGVKEAFLFGGLPPLRNSPDEVYERLYVRVKKRNEQYYTKYPEDIERVKRIIKLLSRFGDTTVRVQGGEGYLSARRFLQLGIFFGKHGGFDEVHALVLRADTDLNQFGHLTRPTVLALEAAQSWDSNVIYALLHEPIYCQGEAASWSAERLLAKFPEFSLQNIDSADPVYFTGEMIYPFMFDCYPELTKLKTVGHLLAEEKNWPPLYDVAQLKKN…
>Alen_Al4_ctg01_-_Alen_Al4_ctg01g757t1	MAKDKKKGDKAAAKAAKAAKQEKKAGKKDKKVASKNKDADSDTESVDLDAVLAQYAKEQELYNEITETACEPPSPRSSSTLIANPANENEIFMYGGEYYNGATAHFYNDLFVYNIKRDTWNKVTSPNSPLPRSGHAWCRAANTQEIYLFGGEFSSPKQGTFYHYNDFWKLEPKSREWTRVETKGKASSPPARSGHRMVGFKQYIILFGGFQDTSATTKYLNDLWIYDCVNFTWHTPKLQAARAVPDARSSFTLLPHDQGAVIYGGYSRVKTTAGGNKGQQQQQQGKGKKGGGGGPSSRMVLKPKVHVDTWFLRITPPPADQPSTTLPTVSWEKRKMPANAPNPARAGATMAFHKGRGVLFGGVHDVEESEEGIDSEFFNQMFVWNIERNRYMPLTLRRP…
>Alen_Al4_ctg01_-_Alen_Al4_ctg01g758t1	MSKQKTEDETIDRPKSSEQAGLKQGKKRKRIEIPNGKSQPNAPSEKVAEANGVKDEGTTSDALPKASKSGLSSPVKHQKSKSTPKLGKNDQTRKRVDKRMSIKPQQSVPPHLSRKRDELLPKRKALPIWPQADSIKAALKKNNVLVLTGETGSGKSTQVPQFLLDEKWCTKCIAITQPRRVAAISLARRVAEEMGSYMGSQSPMAKVGYSVRFDNATGPNTKIKFLTEGMLLQEMLRDPIMSQYSAVVVDEVHERSVNVDLILGFLKNLVTDIEQSGKKRQQPLKVVIMSATADVEALVGFFDESGKSEIATSASDGDVTMKEASEQAIVSRVSKCFVEGRQYPVKTVHLSSPTQDWVEAALKLIFQIHYKEPLPGDILVFLTGQDTIEGLEKLVNDYA…
>Alen_Al4_ctg01_-_Alen_Al4_ctg01g759t1	MKLFKNHSGFGPGYVGLPYQTIKVINMPERGDLVPGQDPPEPTPKNLPHGDTEDYQSYILRYWLDKQELSHREGEIVRLDFKVQRRGRQTGNKYSTIGGRAFEPTTATHEAASALGETAVAGQHASTVPSLWTQSPVNGGSTEQARVRKVIQPLATRGFLNDRPPLALAMPPKFDPSEVKVIHLRATGGEVGASSALAPKIGPLGLSPKKVGEDIAKATGDWKGLRVTVKLTIQNRQAAVSVVPSASSLVIKALKEPPRDRKKEKNIKHTKSVPLDEIIAIAKTMRFKSMAKDLKGTVLEILGTAFSTGCQVDGRSPKAVSDDIKSGEIEIPDEE
>Alen_Al4_ctg01_-_Alen_Al4_ctg01g760t1	MRSLHFCSATLPPLPYSHGGTIQINARPTKQRCKVCISRTITQSLDTDTLCLQSFGPSAMLTIKVGPAANCQSFLIHESFLTAHSEYFRRAMNGRWAELETRIINLSDDDPEIFALYLNHIYKNEFPVMAISKEELCALPLSEFTGYIDEEYTTLFKLYVLAEKLQDDFAKDEVITAIFQLLYLGSSDRFWVRPSEEVVEMVYDATPKGSFARRFCVDSWSNIEPRYIQQLEEKLPRDFLFDLAMVFRGEMPKVTRNVAGRKGVTAYLEATRSSQKQKTLAKQDSTPIKLP
>Alen_Al4_ctg01_-_Alen_Al4_ctg01g761t1	MARLRKASPLESINFLQQPNQARPIRSSPRKAVREVSYLVSSDEDEGNIPLRPKPSKRDISDLSSIFQDDTFYTSKSHASPSISTMTPRKQRVLRPVESNSRLLRKLSDESLASPEKRPGSERRARKERISTSEVDTDIGRKRNLMYAKSLARSVAGRELRKASSKIDVLDEAGMQSSTKTRKEEQSAVVHIEVDSEPEEETSILCGDEEDMAQEEEQQRVETYNLEDPTVEEHDSDDEDIVLPVRSRQRRPQRRIESDSESEFEGKAVAEVEQEQPDVEMGEPEPLISMRPPHRKGHSTISNWAQEVIDLTDSPKAPDSFILPESTRARSSSFAVSRPATSSSDCLQPFLTYSPTPTKKRSPCKAPPIVRPTTPTLAPPSPTKLVSPSKKKPQIPKAP…
>Alen_Al4_ctg01_-_Alen_Al4_ctg01g762t1	MQRFSRLGRVGQSFASRRSLATVSDAPLSRKVEMTNWEKGNYINYQKMSENLKIVRGRLNRPLALAEKILYSHLDDPHNQDIERGTSYLKLRPDRVACQDATAQMAILQFMSAGMPSVATPSTVHCDHLIEAQVGNEKDLARAIDINKEVYDFLSTSCAKYNIGFWKPGSGIIHQIVLENYAFPGALLIGTDSHTPNAGGLGMAAIGVGGADAVDVMAGLPWELKAPKVIGVKLTGKLSGWTSPKDIILKVAGILTVKGGTGAIVEYHGPGVESLSCTGMATICNMGAEIGATTSVFPFNDRMYDYLKATKRQHIGDFSREYAHELREDEGTEYDQLIEINLDELEPHINGPFTPDLATPISKFAEAVKANNWPEELKVGLIGSCTNSSYEDMTRAASI…
>Alen_Al4_ctg01_-_Alen_Al4_ctg01g763t1	MPAIRGQDSKKKTRRHTRDLDQVHADLHDEKHLAEFKNAKPIEDLPGLGLNYCKECAKFFESEANMLAHQKGKVHKRRVKALKEEPYSIKEAEAGMGFTTNNGKRAAAPAPMEVDDAVVV
>Alen_Al4_ctg01_-_Alen_Al4_ctg01g764t1	MSFTDTLLYGGAITVDLPSNFADTSQIREVPDHQEVYLDTNGYSSIVVEILEYQEKGSDEEALQYHFADLIDEEDSTNILEQGRAVMTKMNDKPVYTLRFIQTPPPNTNPSRKVPEFVYIHLMLLRLREQDTDLMISVNIPHYSGEYEKPKEGEGEVTQLMKDSEKIKDRILESFEIKEWGLFEG
>Alen_Al4_ctg01_-_Alen_Al4_ctg01g765t1	MNSAPRPVRADKGSMPEPVFNFGPAALPTVSVGTESEQQKFIAHECFFTSRSESMDEQGDSLSSEYLEDLVVLLRRRARQGCNSKVEANLNGVAAYMDPKANESQDFEALFSEPWQTVLGVKAKVVEKLRETFLKRPKMEMLELLRAHSTSSAKDSWLMKTRCYSLQYEKLSKVLASETSTSQTLDSNTAAGAMPFRLLDLPPELRNRIYEVLVVRDEVRLDYLHLNNQQPIIKVVYNVHRQPDVPPMMAICSTSRQVYTECQPLFYAKTTLYFDVQNDAVVKTSVKLAIAFLKSRPCSLYAIQKLGIYLDENMDTDGHASIQDVTRYEFQIFCDLVASHCNLKFLVVDIWNWADTAPMEFDAAIANFGESELTHSIPEWALQLAIVRDLERLDVRFGY…
>Alen_Al4_ctg01_-_Alen_Al4_ctg01g766t1	MSIPSRAIESKTLSKYGPAALLTIHVGKEPDHQEFVAHESFLICRSEFFRRAVNGRWEEAETRVVKLPEDSSEVFARYLDCAYTNRATSELLDRPSYDILSWNDTRNIAHIDVHNLNRLYILADKLQDPATKNAAIRTLFRVFHWEHPSRRILSPSLSHISMVYENTPEHSPLRCLFVDITLRYPLEGLRQIMTELPREFLMDLAIMLQGIATNTADVARQNGVEAYLERS
>Alen_Al4_ctg01_-_Alen_Al4_ctg01g767t1	MGAPRRAGQPFRRVGKAGNTSYGHNKRKTVDAGSLRSTEQTSQNEKLEATRLAHRIDESMGFPRFESGKKKVGWLVNMRSTAIEDEHVPGGRAGVDYYFLGEHGDTFKATLEYDPYFLLAVKKGKEQEVEEWCRRAFEGLVKTFRRVDKEDLSMPNHLTGYRRTFLQLSFANVNDLLAVRKAVGPIVEKNKKNVNAMDTYAEVATGNVDMDFYDNDDYEHEKRFTTVVDSSDFILDIREYDVPYHVRVAIDKDVRIGNWYTVEAKHGVISMTCIEDRLTPADPVVMAYDIETTKLPLKFPDAVIDQIMMVSYMIDGQGFLITNREIVSEDIQDFEYTPKPEYQGPFIIFNEPDEKALIERFFEHIKEARPTVMVTYNGDFFDWPFVEARASVLGIDMYQ…
>Alen_Al4_ctg01_-_Alen_Al4_ctg01g768t1	MADDTRPTSGVQTTQIDSLPPRPRAPANSMPGGTAHTAGGEKVDGDGPSYIDAVRTLGPEYYMNFHKRPCVRDSQLQGLAAGFAGGSLAAIVGKPVLIASNWAVATWCGVSVVSYQVCQYYRSKEKAGIKQAQDLMEKKRANIEAKKEARRRQREEYDRQQELKRQEEERRKSWGYWYEKNVKFW
>Alen_Al4_ctg01_-_Alen_Al4_ctg01g769t1	MAASTCLAVKHNHNNTLSALHDGICPACRPHVKATAGEMPSMQLAHPSPKRKRDPPQQIPLLNTALAIRPAQTPPRRDSPAPSSGGDSPRNAVADQLRGMTLISTAAIPMSPLTPTDDVVRKKPKLGAMNVDEEDARAAPHANTKPRKKVNILDAVVFEPPLDTTREIPETPQAPRPRIVADIAAFAHPTTFVSASGGTSSPQTSFSCQTSHASTSSNRSLSHSGPQKMPASPPLSALTWQDDEITGHLTGPANDPDDDGTGLNGIGFKPTPAIAYARAQRRKQQLSEWKARETREARAKRSQRRHRGVSTRPHESRESTVERDVPAQPIEVPRRKVQFTV
>Alen_Al4_ctg01_-_Alen_Al4_ctg01g770t1	MQQSSIRGFFKPKTSQTNQSQENNERRDQRPGQPYRSRSGDPRPSHRGQHRGGNRPRNIELKKVAEETKAVLPAVLQSLPGFGADSSSIHNLYGLAPLDVNDCPRHVLPNSDKDAGKVGTRIRVVDRDSFDAAIELQPNYKAHLHLSNSSPAAISVTTNSNPQFSSAADDGEMDLDGLHLNQPQAPPIQAWDLSNKTPKRISQQKHPTISRQAPQPVAVLNLASERHAGGGWQNGAMAQEEALCYRSSLYLSLHKSYYPLPSLSVIYTPNVLIIRSATSTGHALYTRPASDLPVTSTISIAALRHPALTDDGKKFRNEGQRAETKKKIRVSLRTAASKGHTRLVLGALGCGVFSNPPTEVAECFLEVFRETEFQGGWWEDVVFAVMDNARGDQAGKDGS…
>Alen_Al4_ctg01_-_Alen_Al4_ctg01g771t1	MAQNYIPAVVPIPGQIVSVVLQMSTFGVLCICFTRRTSWMKNWRTLSLAIWLILMIYVDSTLFVLATSIIVHGLGINSSRGVCEGGILLCLVCYMTTKILIYYFLVERAYVVRGSLKPRLKTKLWLFNCLFMILPYTVFLIMNFVWSITYINDKGVCIIGMQKIAMLPLIIFEVVVNIYLTLLFILPLRQLYTYKNNINPKLNRMAFRTLVGSLATLTTSVANLTALMVLRGEPGWICLMCCNADILFCVVVLHWVTSKDKPSSWTSTHASRNKTSDLSRWVPTPGPPARYSIGLEKTDAVHFDMTEVMQRDIHSARQTADPGFWSYDASSTSPTSPKFPGTVTTEICSGPPSFTHSKSQSRRVLHKSRDGSECSDEVELHKIHVQREVCIDSRSSASE…
>Alen_Al4_ctg01_-_Alen_Al4_ctg01g772t1	MVRHKKDFKSNNKYSNRGGRPKGAGPPRPRRDSDSEGENDAENPRPKKPEFKAACWDLGHCDAKRCSGKRLMRLGMMRELHVGQKFAGIVVSPKGRKIVSREDKELLDQYGAAVVEASWNRIDEVPFGRIGGKCERLLPYLVAANPTNYGKPWRLNCVEALAACFYICGHPEWAEEILSTFSYGRAFLDINAALLKRYEACENEEQIKKAEEVWLAKIEQEYEQSRAEKEDGAEDDVWAGGNQNRRVIDESDDDEDDEEEGDDDDENEADLQNPYGLPESDDDEEEMAELRRRVLASKPFVNPTPKDQDDDDEDAKKAPERIPRTEPAPAKEEAADNSDASNNDAADDDEFDSFMNAQPTTDRTGITGKQRQKALDKQTATFSSGKVSAPSRQGY
>Alen_Al4_ctg01_-_Alen_Al4_ctg01g773t1	MEAASARMAARDRYGAFGEAPTSPLQRFILQACDPQNFEPNLALNLEITDLINQKKGSAPREAAVSIVHYVNHRNQNVALLALNLLDICVKNCGYPFHLQISTKEFLNELVRRFPERPPVHSSRVQNRILELIEEWRQTICQTSRYKDDLGFVRDMHRLLSYKGYIFPEVRKEDAAVLNPNDNLRSAEEMEAEEREAQSAKLQELIRRGGPQDLQEANKLMKVMAGYDQRNKTDWRAKAAEEVGKIQQKARILEEMLQGYKPGDQLKEGDVFEELASALQNAQPKIRKMCEEDSEDTEAVAKLFEINDSIHRTIQRYKLIKEGDIDGANKIPQGTLGRSGAGVSKGANNQLNLIDFGDPEPTPAPAAAESSGAASGQSAGKGNALEDDLLGLSLSGDSY…
>Alen_Al4_ctg01_-_Alen_Al4_ctg01g774t1	MVKFELLAASVLAVGALAHPTIKHIGSEKRFCANEEPSTIFARNELTSRAAIPKATTWNPPSNLVTALDQVWKQTLKENPDGLKDKNWITDQFMANNGTINYCVRWNLASRKSTAAERTKTTAALQHSLQKWFDVLVGFEGFPLTKLTVKTVGYAVKDKSQIEGDAKGLDIYTTTDADGVPECDTRCYRGAHLDDPNGISSCPGGEDSRWDLSLWLEDSLEGQIGGYGYNWGQELAGDYVLGNLDSDNIHILLHEMGHGFGLLDFYDWVPKDQTSFIMMAGSAMEITEFDAWMLRDWYRRLKEVRGW
>Alen_Al4_ctg01_-_Alen_Al4_ctg01g775t1	MATKIGLGVPMPLLAPATATWAAPFAAYYVFLQNRIVYHRLNSKTYMGDSSDKTQGVKDPLYVATRAQLNFAENVPLALAIALLAELNGANRTYINYALGALFAFRISHVEAGLMIKDSMGPGRIVGYYGTQTVLVALAGYTAYLVKDFLQIAA
>Alen_Al4_ctg01_-_Alen_Al4_ctg01g776t1	MSASLAPECNEVKEKYDNCFLKWYSEKFLRGTSTSDECKPMFDQYEKCLSKALSERGIDKMLKEVREDNKENDAEHMRPSR
>Alen_Al4_ctg01_-_Alen_Al4_ctg01g777t1	MESFKSLQDEISKALVSTTRSATRIAGADIAFQRSLNPDVGTALDTQNGRLLHLAQRLLENAAASSDAVGPKLPDVESIDGNWRAVVDVIDSLLEKADTSLDEYTGVVKRLSPGADQAAVKPRPNIAERKHLVKPQLTFENVPTNDETGGFRPLLVTKPHATIPLEECLKTFKDSKGREQYPHPYQTEIEAYKYPQAVYQHAEPKQYPPFEETTATFVDTPEALATMLAELKTAKELAVDLEHHDNRSYIGMVSLMQISTRDKDWIVDTLKPWRRKLECLNEVFADPGILKVLHGSYMDVIWLQRDLGLYLVGLFDTYHAARSLGYPGASLAYLLERHVNFKAQKQYQMADWRTRPLSQELFDYARADTHFLLYVYDKMRNELVEKSDFSDPEKNKVHD…
>Alen_Al4_ctg01_-_Alen_Al4_ctg01g778t1	MAQYDSTAAEKGESVLYEGGLSSPSDRSTEEFTWTEEEETAVRRKLDRVIVPLTTFLYLLCFLDRANVGNARIQGMAKDLHLVGHRFNWVTSIFYMVYMFVEVPSNILLKKIGPKWYLPLLVVGFGLVSLCTAFVQSFQGLLAARAILGVFEGGVMPGLAFFITCFYKRNELLFRIGIYVSAASMAGAFGGLLATGLARIPPWGASSMIIHTWRNIFFFEGLFTLIVGLGAPFLMPTNPGECWFLNERERRIAHDRLISKTGAGEHEKVRSHHVKRAVFNITNYICAFGFFFINITVQGISLFMPTILNDLGWTATKAQLYSVPPYVCACLVAIGIAFLSDKTNRRGLYLAIFTIPAIAGFAILRWVTDPNARYGGIFLITLGAFPGGPGFLTWATNNA…
>Alen_Al4_ctg01_-_Alen_Al4_ctg01g779t1	MPSETPKKVLIFGATGLIGHFIIQEIVNARSSFDKIGLFTSPETAKNKPDEINGWEEKGIDINVGDVNSEEDVKKAYEGYDTIVSALGRNAILTQISLLKLASASPTVKYFYPSEYGTDIEYSPSSANEKPHQLKLQVRKFIRENAKDLKVTYLVTGPYSDLFFAPNKDPRIGSFDVREKKATLLGTGKEKISFTTMRDVGRLLVAALKTPTADSERILKVNSFTATGKEAVAEFEKQTGAEWNVSFTSLEELKKLEQQAWEEDWPSKTPLTLRRIWTEGGTLYERRDNGKVSFEDGLETLTDQVRNIIAKHG
>Alen_Al4_ctg01_-_Alen_Al4_ctg01g780t1	MTTDKAPELAMSEKMVDLEKADASTDRSPSTVELGISQPVNALQRFCNKLDAVCGVEARGIERIPEELRERDMSLKDYIHMYTIWFSMNCTANQLTLGVLGPVSYGLGLTDSILICMFGTIFGSVCTGYISTFGPRSGLRTLNVAKYTMGWWPSKLCVILNLAIEIGYGLIDCLVGGLLLSAVNGGGMSVIVGIIIVALITWVVVTFGIKWFYKFEQFVWAPTVLVLFVLIGVAGPHFDTHTPSRGSGAVLHGNRLSYFFLVASGPLSWSSASADYVVYYPKTTNRWGTFAATTCGITTGKLLIEFLGIGLGSGLLLNPNWEKAFNDHGIGALVVESFSPLNAFGKLCSVILAVCIAANNIPGTYAAALNWQQLGAPWAKIPRPIWSTFTCIVFTIVAI…
>Alen_Al4_ctg01_-_Alen_Al4_ctg01g781t1	MGSILQNKAAYLDEPGAQLVVRDAPFPKAGPGEIVVRNAAIAINPIDWHIQDNGMFIKQWPAVFGCDVAGEVYETGPGVDLFEIGDRVIGHAINIWSGRPQDGAFQLYTVLSEDKAAQLPLSISFTNGVVLPLALETAICALHFDRRNPLPDFLPGIYTPALGLPYPSLKESRPAAGKVIVVNGGSSSVGSVTTQLAAAAGLHVITVVGARNFDLSKRSGASECFDHKHPFLVDKIVEAVRNSGQEFVGIVDAISIPDTIATDLDVLGHLGGGHLALTHPHMGKEVVPDNVEIGMIWSGGVNEITGPVWRAYVGAALKFGKLKCLPPPSVVGKGLEHIQEALKLSKAGVSGAKLVVEL
>Alen_Al4_ctg01_-_Alen_Al4_ctg01g782t1	MAPWISKASEEFHGMTFHNNPVALVVLAHWAASLVKRVDESGRWYLLGAAHFIVTQAANRLPMIDRPTFQKLIEAHIGFTFTAPASADHTTPEDGHNNTSPHRTRPPNSDADKHEETQPESHTRYRRWTPQEESQLVRLRLTERKEWSDIAQALNRTSPSVQTRYRSLRNKTVWTEEEDEEILRAWKELKEDEELVDPLNGIGGFYRNVGERRKQLCKEMGPVYKRVMGMDEHKPVQGALEKAVGKKHGWMD
>Alen_Al4_ctg01_-_Alen_Al4_ctg01g783t1	MKCSTICAAFFAAVVAASSDVTQLKTDTFKEFVQDNDLVLAEFFAPWCGHCKALAPEYETAATTLKEKDIKLVKIDCTEEQDLCQEYGVEGYPTLKVFRGLDKISPYSGQRKADALISYMTKQALPAVSEVTKDTLEEFKTADKVVLVAYFAADDKASNETFNSVANGLRDNFLFGATNDAALAKAEGVEQPGLVLYKSFDDGKDVFTEKFDAEAIKSFASVASTPLIGEVGPETYAGYMAAGIPLAYIFAETPEEREQLAKDLKPLAVKHKGAINFATIDANAFGQHAGNLNLKAGTWPAFAIQRTDKNEKFPYDQDLKINEKDIGTFVQKFLDGKVDPSVKSEPIPESNDGPVTVVVAKNYKDVVIDNDKDVLVEFYAPWCGHCKALAPKYEELGQA…
>Alen_Al4_ctg01_-_Alen_Al4_ctg01g784t1	MLGGIISAGVQRLTCLFSTSLPGEPWVLDYEDVVEARALLKGLGLPMELALEILDHAQYWPTRQFSTENGKPVTVVASMLRSSAAALCLEFDAFNDPVIDSLRAGGEKVKIKAIDFCIRSRDQGWTSEPTRGTFNTSSWLEASILRGVENHATAFPPSCWLDSVFASPKSFQEHITPHGWRLVERPEYAEQGPQGGEGELAWYLQGNRVATQGRLEEYDVLWTHEGHEGNEGSGTGDGFLQELKDGDRMLVWARAKWPGWQCVVESVNVTIYYGFS
>Alen_Al4_ctg01_-_Alen_Al4_ctg01g785t1	MHIIDSNSPRQHSTRAPHVGKQQTSPLRLPDTPHSPSQLPTVMADPLETANKKKDGHVPSPLQSLSSSTASLGRSPPPGLAMGSSPSPHTHRGSFAEQMRGGPGSPRASRQPSLSQQAFQDLINNPPTKAGDPKFHGRDWTTVRLGEIVDPSLVRFVEYDTSVEDATSLLVKSGAPNVVLLRQDASTRHAIGTFDYSDLNAYLLLVVGLAHPEEQDVASFDELAKKGREGKPIPLKDVKDLGKKEPLITLPHTADLTKAMEVFGSGVHRVLVAKEGTTDVVGILTQLRMVSFFWENRQSFPVVDQLYPQLLKDLNIGQKQVLAINGDKPLATALELMFNEGVSSIPVLDAQNNVIGNISHVDVRLLTKSTSLPLLRSSCIHFISVILSERGVNDGKDSF…
>Alen_Al4_ctg01_-_Alen_Al4_ctg01g786t1	MSGFPGQQYHNNYGPPPPQQHYGAPPPQAYGAPQQGYGAPPPQQGYGQPQYNGGYQATPPPQQYGYQQPPQQPYGQYGQAVPQQGPPSHQQRPGMMPTATSNQWTHGNHNGPPPPPTGAQNFGHGAPNGYSFQYSACNGRRKALLIGINYFGQRGQLRGCINDVKNMSTYLNEFFGYKREDMVTLTDDQQNPMSQPTKANILRAMHWLSLCWTLNESANNSTGHGGQTKDLDGDEEDGYDEVVYPVDFRTAGHIVDDEMHRIMVSPLQPGVRLTAIFDSCHSGSALDLPYIYSTQGVLKEPNLAKEAGQGLLGIVSSYARNDIGGMLSTASSLFKKVTSGDDVYKKNIRTKTSPADVIMWSGSKDTQTSADASIGGEATGAMSWAFITALRKNPNQSYV…
>Alen_Al4_ctg01_-_Alen_Al4_ctg01g787t1	MPGLARGDDRPATPTGPSMAHRPNGTMRALHTNPPRQETFFDDATPTDNARDSRPESEPDGLRDSHDLSFAEGATARDSVVDNMLLSLDQFSTGNMFGASSSSSRREDDSFFLRDASYRPPGNRNRGHTYTTSASSDYDLHAEDSTPRYPSHSRARRSNSSNNMASPTKRNGSARDPYVRRQASGAYGQYQQTAHMRSGASKGSKSSGSSSMDFGQTGMLGTHRLGFGKRSASFDHSNRSGMASANNESVLDRGRTAYQNYDEDYDAAPEPTIPAGPRRLPPPPASPVAQPPQQPVYAPPLAPAPRRRGSVRSNTSYRTLRKGKSQLDPSMRAQAQEFVNASTLRDLPSVPIYQEATAPAPTVGTRKPLFGTQDPAPASKERPGFFRRVFGGSSSKVQA…
>Alen_Al4_ctg01_-_Alen_Al4_ctg01g788t1	MRRAQGLRVSSTRDICIFCATRQLATANTPLPTTSTQRRYLNSSSRAHQAEAQLYKSEDAPARPLTQAERMRQALVAAQSAPSQSPQGGYVTPAQRMRASLGAQESPRTQSSMQRQPLQDRRAPSRGGLFDGLGRDQNRDRSTPMARRVGNDGRFDPRLQQRDRFRVNMDSKPQFDTPTFGPGHFRRKNEPQAVPAQSSQEEQRRPPPRAVSSRGKLDQSELDKLLGNDFSQSRPSRPYQPLARNSNAQRKCFNCGSPDHLSAACPNKPTFRERPDAQRSTNGSKVMYQPPQIDRGTRYQSPRATPESLADAANEWVSKRGSKLEVAPQSYMVEEERDNKARNVEKERRRSRFELEDEPTEVRNRYEQPERRKASGRNNRRVTRYEEEEDDVEDRHVNK…
>Alen_Al4_ctg01_-_Alen_Al4_ctg01g789t1	MNPQIQLPRPNGGPSNFGSTPSTRRNEIRMPRFFKRLFKFPQMDFEMAIWEIMSLIIAPKKVFRQIYYHKQTTKTYHRPDPSFTYLLSFFLTLTSLAWGFAYADGFTQTIHITLVFIFVHFLLLSLVTATLFYFLVGRLLGPGNSLLPGRRRGLYNLGDVDSKEELEFGYCWDVSIRAFVPVWVFLYVVQFLCMPLVGTNHWVSLLLSNTLYVFALTYYFIITFLGYNALPFLHHTELLLVPCAVATILWFISLFGFNMSKHFAPVLWAGARLRKQVG
>Alen_Al4_ctg01_-_Alen_Al4_ctg01g790t1	MADDAELAFLRSQEQEYDPAAAWPAADDEAPVDDTTAEEEYDPTRTMDTTQDPGQPEQSESMPESAAHSPPLADNQGEDAVKSVSAETSAAPTPAKQPRTIGGFVDESEDEDEEPVAAPKVAAPALTHASEAAETPQRSITNTPNNTLPTPDVQLHSAQDQGASSVSASVAVNELAPSIASVPVNGTTPVPDATKPADLLTIDPARQATASVTPAPPSASLPKARLPQDRIGILNDRIQEDPRGDIEAWLSLIEEQRKRHKHDEAREVFNRFLDQFPTAGKIWVEYINFETELDELARVEQLFGRAVPKGAYVPVFSCYIDFVRRRFNLTNDATGKSRETIIMAYEFVLDQVGIDVDAGKLWIDYIELQKTAPGILGGTNWQDMQKMDTLRKLYQRAVS…
>Alen_Al4_ctg01_-_Alen_Al4_ctg01g791t1	MAGPPKNRAQKQKQQQQQQQQARSSNDSSSASRDPTQRSINKLDGNKDPQGHGQGVLDYTKPNDLKNLSEFLGISGWYAARGHSIPVALPQRPKNFNTYGKETTITLNTFNVIKSPNTIVHQYDVAYSGDAKDYTKRALLQKIWKSKTVKSELGEPANLWIWDGHKLAWSGKRLPRDDNRITVDLDAEEGKETRAGARGNKHTIHLRWTRQVDFSGLQAFLNGQASWSTECIDTINFLDHVMREAPSQHYTQIKKSFFQRGEQRFDLGGGVEAFKGVFASLRPVLDDKFNKSLSVNVDVANGTFWRSQELTRAIGQVFSCGAPQFITRVKDARRDWRTSMLRKDLGSFRRVGVTATHTKPHTQWTIDEIVQHDATEIKFADPEDRRPDVPDKQRKQISV…
>Alen_Al4_ctg01_-_Alen_Al4_ctg01g792t1	MAESISGEEQSNYEAFRDCMSEPVMKALALPAEKEKPKKKRMAKKSAKYKPVGMFAPAKPQVDAPNTASTSTPSSSDAEDLGEFIDYLSGLIFPSLPPDLRNLSYPKFRDSILLQDAYSTPLSASTYTQLLSTLPPTAIDSLESYALLPSPSDAHDHHNLLTPVFTSYISAVTLPPPIWVTTRTTECELCERDWVPLTYHHLIPKSTHDRVRKRGWHDEEVMNSVAWLCRACHSFVHRLASNEGLARYYYTVDLIRDGGVDHDEEKAQEVEGWVKWVGGVRWKSR
>Alen_Al4_ctg01_-_Alen_Al4_ctg01g793t1	MSSARGRGGKFNKIKRGGGKKFSRDLQPLNADGEVVGMWGEQPEKVDEESSDEESSEEESSEDEDGKPKQEELTREQRRDAAKARKQAAIARKSKKVPEAGDLPTSDEESEEDDDMPANPNHTAKARTQATKAPVDPDAAPEPAAKGKGKQDVSQLSRREREALQAQQAKERYEKLHAEGKTDQARADLERLKLVKERREAEAARKKAEAEERAELDKEKAEIMAREARRREQAMGKANRLAKGGKKK
>Alen_Al4_ctg01_-_Alen_Al4_ctg01g794t1	MSLKRKAAEAATDATKKPKPNGSITAFFGAPKSSPNAKASSAVAAKFDRDAWVSKLTDEQKELLQLELDTLHESWLPHLKDVLVNPQFLELKRFLKKELSSGKTVFPPMRDVYSWSRHTPLNTVKVVITGQDPYHGPNQAHGLSFSVRPPTPAPPSLQNIYKALKKDYPDYQPPPKKGGLLTPWADRGVLLLNTCLTVRRGEANSHQGKGWELLTQKVIDTVVKVRNNGVVFMAWGSPAQKRTVGIPVDKHLILKSVHPSPLSAMRGFFDCHHFTKANEWLVQRYGKDGGVDWDLNVDPEDIVEPSKTGQPTDPKDNVQSKRGSSAKENEAPSQGANITQSKAVEDSTGDNTAEPEDEIDSDEEAALREAGL
>Alen_Al4_ctg01_-_Alen_Al4_ctg01g795t1	MASSNPANFANLPKDELKEIAAKGGHASHGAHNEPTSNDHADRNPDGTFTKGSELAKELGAQGGHAAAHHHQDTTGSTNSNDGGRNPDGTFKAGSQLAHDLGVKGGHASHEHGHGQGGTADANGRNPDGTFKSGSQLAHDLGVQGGHASHSHQQ
>Alen_Al4_ctg01_-_Alen_Al4_ctg01g796t1	MTEVKADKATAKSTSAELSPASSHVRPAKDRGITLNAAETEAPSAEDDSAIVEEEAHSDPEIAQLPLIVRQLVSLEDDPTLPTITFRYFVLCILFIVPGAFLSQMSHYRTTQAPYSIFFVQIACHYVGHFLADRLPAWQVKLPFGYGFNLNPAPWSIKEHVLVTLTAASGATYNLGYTPISMAALWYDTEVNSAVAIFFMIAIVVCGYAIAAVARSLLLWEPEYVWPQALMQTTLFETFRKQDRNSKLAKRQMHIFFFCLIGMTLWQFLPEYAFPMTSSLAFLCWVAPKNSVANFIGSGLGGMGLMNLSLDWSNINWNGSSILITPFWTQTILFLAFAFNCWVLLPAVKWGNLGSYKHGLMSNSLLLANGTKYPTLKIVNKDFSLNETAWEEYGPAYMG…
>Alen_Al4_ctg01_-_Alen_Al4_ctg01g797t1	MSGPTSNPDWNTNTGSPAYGTFPRPRLTSNYSSRDSVNSNAVHSNGGDVSPKRRPSPVQRKSSRHIEFRNHLKRPYLTDTQRTLSDALRAAKSREEQETLLPDDDHAGSDGCFNGNGEPVGPREVFAPYPHSGLKVYYNIHRNYDTHPSVIISEQALTRESIRRLILAVIEDPYTIEQLREPRMNVLIVKPLVDRLYDEDDISIVYCLLVNRMQFLREQQFQQHHQTVDLTRANLCELVAMKVLRRHDEESTGKPGLLLLAQVLVAPFQPFQGAPEDVCPPRHISEYQGQGEYEGKLTALEVAIVSESKILLSSSASQKVIDAVYRGRIVYTPTTFIDIIPDHYKYKPISLYDPRKAPVLNQYRLMVPRTRNILEVGQFVILLACYCWCMHERVDHTLT…
>Alen_Al4_ctg01_-_Alen_Al4_ctg01g798t1	MSANNLNTKLLPPAYHKALPLIQLIAPSPPANQQPQGITPSKLVTIATTRPNIHFRHGRGLAVTQIQPTDRQSSKTLESVGGIVHLRGRLRISGGKHHLARDGKGVHIQANLLLELDITAKKELLSLFASIKLWKNNKPTPTHTADYLSTMAANYPLSDLASLKEQFVGRKLNELPTPSIVLDRSLVKKNCAAMLQICTKLGLGFRAHVKSHKTLELSRLMVGDGLQDTGEQKALFIVSTVAEAENLAPYVQQCQEKGREASILYGVPVPQGAVSRLVALANRLAPGSINVIIDNADAFARFHDNLTAHADFSNSKKIGVFVKIDTGYHRAGITTSSPKFGPLVAAILAKDGTNGRDGSIVLRGFYSHFGHSYAGSSEDDAASGLIDELVGLEQATHAV…
>Alen_Al4_ctg01_-_Alen_Al4_ctg01g799t1	MHTSAPDCEETPPFTTIGDGQQPASPSSPDSAPAGTGTTDPLVAKAAKRLADVINDFKRDLHQRDGTWAHAQGSLQLARKAQNSEPFTLTITPHEDGDEHPVTVQAALKKPELITISDDTTPTAQPILTSTRRASDAELEKDIVSRKKRKREDGDQQTNKRSRANDDEDVENIMPLITKEDINHLLVKLREDIQEDTTETVNHVQRLLRRFKEEWHEKSKWDLEQLQSRQSGAPFGNATSAAGAGSHDSFPSPDVDRDDINASVVDVVRRETGLLSRQIKWVEDCRRVASKTHVKREDTWRTTSAGFHDKQRQDRENFQNRMVHESTMHSQTLNQILNEVKAIGLYAQNMKWETPSYLDHMPTTSPQVPTFPTQTAQPAFPKQAARTTHTSSTGTKQAD…
>Alen_Al4_ctg01_-_Alen_Al4_ctg01g800t1	MVPLRRASQRERRSLEHDRDPFEWHQARDEPIMTATFPIHPLPSMQAAFEESMLDATGETGFVPFKTPGRGVKTRQQLLCREADADEPSWNYTYSCHWRHHPKGNFHPLLKTITQIVFGVHLLHQRLEKSTADVADILLKHVNELDSFLQRANEDVEQSLKDMLFRHKCLRVPMEHVNEFDRLLDDRAYRSSLLDGNITIERTINRMSQLLNDYLVDISIYRDANHELELYLRDIGNEWAYHNEDVGRIYSAMCGNTGGWAQFLQSLVTKAERLGAVLVQVSSYCNEIEKRCGAASRRSLIATTSSSRNSSKSNLRDNGRRSSRKGSQNKPLPTPPTPQVPVILATPQLDSRTSPDAEARGRPISRIPHYQPQSEPVNPYMAGNAQRKAETPTSPPAPA…
>Alen_Al4_ctg01_-_Alen_Al4_ctg01g801t1	MLADRDPNASGRTSRASNLSVMSRATYRHQGGPDKQDLLTSAPGVMSMLRTSTEMGNVVGLTGDLSGMGNVSRAPQRRGASSRLSTASSMSGTSSRASRHHRQWPSSSSAPRHSSMREPSGPQYVADTLSPTLMNLPGSSPLIPTRHRSSRNNRDSQRSFSMTNTTQPAFRLSSNRSLGSLRSHEHIQRPKSPYIYPTRLRRPSYRPASPALSDIAGSRPQRSHGQGGQGQVPHQGQVPHQGQMRLRIPSDASLGYQDRAPGMPRRPSRGHPPAYSIGFQGDIPPVPPLFHPRVPLERPRAIHRSIKGSFSSGSTNMRNDPDTPSSDLPSPPTPRDGSSLEAVLSSTGTHVLVDTTTIVVANEGVVSSPLYYDYSEQFEREQILEPEVHPIQTGFINNI…
>Alen_Al4_ctg01_-_Alen_Al4_ctg01g802t1	MSASHMAANRNSTPEGSSSLRPPVNRSSLGAGHHLRASADMGGFSSPLANRGIRPASEVYFGRQNTQSGNPDEMERAAQQWLADIDQYENTLEEMATATLDQDFKDELSAIEQWFRVLSEAERTAALYALLQQTTQVQIRFFIQVLQQMSKSLPMSGVLSPANFGEKDPMTQKLSDAMSKLSTGENRHSMMGRPPPSPGAGKRASGLDPSTIHRMFPDAAAAIAKQKSEFTEVVGVPPASNRNSTIGGDRSSMLAPTISAPEEGNLRENAPPASPWNEGQSVQRPKSSGQQQSQSQQQPAMGQFTAPPPSAGLRSPRLPLQNDSSNVQTTTLNALEANSSGMPLLSPAYAPGGSWASQLSTPMVANFGQQANQADMVANATAMKLAALSTVNNRIQLDD…
>Alen_Al4_ctg01_-_Alen_Al4_ctg01g803t1	MSKEEEPSYIDYEAFLDPDFSATAFANTLVLATNNPSDTPLDLSTPLSRVLFDVQEVDTHIDTLTTKSALPLLEHTRDHAESSGRILAEVEGQVASLTESYKTLEKEVIERYEVAEQVRLTAERLVETVRLGRAVARCLMLGRQLEVRMSEVGGVGSAKKEDHRAMVRSADTILSLRQVFTSTRPGQEGEGLDRVHAVNTLKNELVVPGERSIASRAQQVVKEFSMSSLLSSSGQTSASTFAQTEDTKSRTTSALQTLYLLSPTNTKTTSEKFEPSLMLSALQDYLQTSLKSSLASLARALTQLPLLERTLLEISARCQNIMALQSLLQSTKTPVHPLLPRPATPDASTRNDNFLQPLLHALDTGSLPSYFWRSLASSMAPRMQEMMYKGGVSARTLRS…
>Alen_Al4_ctg01_-_Alen_Al4_ctg01g804t1	MPHSKTPGQSNAASDKFNKQDAEAKGLGASNAPAAKEQQKPGEAPVASDSGNSNVGVDPSANKPGEAGIGGPNYGTR
>Alen_Al4_ctg01_-_Alen_Al4_ctg01g805t1	MALIRRYGLYTILAAVFVYMLYSLSFPYEIDDPNARPPNNDAQAQNPGQQQPYKSFDWARKPIQHPVKEIIQLPTGAPAKLPKIQFDFNKEDATAKNIREKRKEEVRKQFLKCWTSYRKMAWMHDELKPISGEVNDHFGGWAATLIDALDTLWIMGFKEEFESAIKDVERIDFGYTALQKVNVFETNIRHLGGLLAAYELSGEKRLLNKAKEVGEMLYHAFDTPNHMPVTRWDFRAAGEGKKQIADNQVLLAELGSMTMEFTRLSQLTGDPKWYDAVTRVTKELEKQQDSTKLPGMWPIVVNARKLDFTEDSVFTLASMADSTYEYLAKMYALLGGQDPTYKKLYEKSMDTAVKHAIYRPMTPDDSDLLSSGMVRVDGTTVYLDPELQHLGCYTGGMFA…
>Alen_Al4_ctg01_-_Alen_Al4_ctg01g806t1	MYTREPPIVLPATSPASSPSQSAAIIFIHGLGDTAEGPLAVAEQFQRAGKLPYLSWTIPNAIEEHHLATTAWYMPTRLSPYPPSRPELEDDEDEDGMLRSVKYITELIDELVAQGVPEERIVLAGFSQGHVMALLTGLVSKYAGRLGGLVGLSGYMALSERVPTLREEAGLPRGVEDNVHVFLARGTGDRLVPKRYHRLCCEALAKLGVKDELVTVKEYEGMGHVMGGAELRDLCVWLERVVPPLEL
>Alen_Al4_ctg01_-_Alen_Al4_ctg01g807t1	MPHVEVLPNSAAAVAPGWTYVVDTGYDPSKVAINPKNKKRAAAAPSGQRGENELSARQQTAIARRIAELERDNDPKQIIPIPGKSSVPKTQNARRIIQYQRQIKHWLDDEEAQLAQQQQAPQLRREATNARNAQSLHRQSTMPPTSTEATPAPTSYQPTRMDIDAASDDALLDVSGSLPSELNPAVLEALLNVPPLPYAASFAAASPPAGGPPQRQFCDNCGYWGSIKCRKCGARVCGLECKDAHEATRCLKWA
>Alen_Al4_ctg01_-_Alen_Al4_ctg01g808t1	MATSSTDFLDMDEPSPQPRQHRSRSNGYVDQLEEQARWDRRDRELQMKRYYENSRHSPTTHHRTRSDHLCVPIFETARRPRNSQRIERQRESESPRSFRVEEVRPGPRPIHDYDHNTEPVLPSQSSTEHDWKPQSQRSKPKIKVQIIQDNPPSLSKTSARTPKRSPSPSPKPSTAQPELQFQYSTLQTKLSQIDATCLPFRDVEPADPHDLTFEKIAAQVEGFSFDLQVWSHVANLNGLAMVEKSKRNVADAASRNLGRLIARVSELHDACAAAKPRDLKLPSLPTAIDIEDNYGFCDDGEDESDIDIDDPTEAPGFVIHSLLQSIEVQIQTLKRLSRSLQEATPDAKDEVVNVARLVEDTTQYFGSDTALKLHSIDLRLVGRKALFEARGTSRTV
>Alen_Al4_ctg01_-_Alen_Al4_ctg01g809t1	MAEVNGIVSDLITAGQRIEIFAHQTNKWRYSSNRLLDLRESIDAVQISLQSWERKYDVQKRRPIIYLQVLFGRLGCERVQAILRDIQVVTGTIQRDITRIVSHALRARPGHSPLGERVDTWLVEDCLTKIRRKPSWSQKFVLSVLGRSEDLEMHLECLHRKLTTLERSSDYYLEKEHSVIFSDIMRLPGRTVVLKTGDRRSGSVQIKLLDALSAQKDAELLHKASDEGNRVHIGLSVPQIREQDFAFLLSLGGTTHEVLVHPVKIKAINGSTRVQSNLAAAVPSLMQAQDKYDVCYVKPSSHSSNGFELSIPPTNLLSDLEYKASLSSIFSERNTRIGAQILYPQDQCAIASGIAQSSFRLLGSQWLESLDSNNVRWRRTASGEHTVMLTPTRGKPPTT…
>Alen_Al4_ctg01_-_Alen_Al4_ctg01g810t1	MQKSLTLLSTCMLRFRVGRGPSAIHRPATVASVFKPRLHHKPTIGEWIPLRGGLPNPGNLENENAQAITRSSNETDSTVGGLTELRPQIFGRSGPKAQSTATVGVRQLDFESAHEHDPGTQQTSLGLGNSGSSTPREVYGYAMRLSTL
>Alen_Al4_ctg01_-_Alen_Al4_ctg01g811t1	MTHPIPTTLCSNGPIYTQPHYRPVMNSPYPPHSPWSSQTMSMPPVSSYSYPPFASMTAGPVLAPDATLLPHSFAGPRTSRSHSGSSSGGLGLPSSAPSDRTPPRSLSPSSPDLRAYGFPNKNGTWSCAYPGCTSRAVFTRGCDLRKHHKRHSKNFFCRHSECPQATGGGFSSKKDLARHEAKHNPGVLCEFGGCDRVFSRVDNMRDHVKRIHLKASRKSSAAS
>Alen_Al4_ctg01_-_Alen_Al4_ctg01g812t1	MHRKAPISLLSFSLFLNPIFAASRDTSVSNANHIFNAIHSSMRQWGGSLNHNGMSFFLATVPAGTQLYHGTSDPDFIQGLQWLAFEPEHALIFARPRGGPGGPPPGEGERPPDGNGPAAKDMPHDGEGWKHHGPPPDREHGPPPPPPHHDDKDCEHHRPPPDHKQRPRPSPCNDTERCPPPHHDGHGSPPPPDCEHGPRKGGSHCEHGPPPPLPPGHIYKPYPPPPRKDRPYKGPSHPPNPEHHRGPAPDHDEWPPKHRGPPSPVREDHHGYHESIEMRSSLKGPWKRQAQQPLKEPISSPDKEPVGYLHTYVPKHPLRLLYVDGLSAGKTSNGTLDTQDRLLLNLTEEDIGGPMGGESMRANGLCELAATVWEDKVDGILRLEGGFEIILCDFEKHLE…
>Alen_Al4_ctg01_-_Alen_Al4_ctg01g813t1	MHTSLSATQGHPPPRPGSFHDPIYPTSPPEEPPPSYDDATHSSSSPLLVGPPPDYGAFRAYVDPDESSEASSEVEGTDQSLQEWLGQAFGILAFVGFMYGFWRIINQPDIEGPPG
>Alen_Al4_ctg01_-_Alen_Al4_ctg01g814t1	MAADPTANLQLFSPPGSGRSSPAPRATRNATEDALYKKDKSFRRYALGVERTLALWDTAQQEWADYISFLGRLLKALQAHPSETPVIPHSDTVALRLAQCLNPALPSGVHQKVLEVYAYIFTAIGEDALARDLNLYLPGLSTTLSFASLSVRPLFLSIFENHILKLDGPALRPALKAIILSLLPGLEDETSEDFERMVSALDRLREAVQDQTNDMADAKSNNGHASHFWQCFFLASITNASRRQGALAFLARRLPKFGLPTSKNTTHSVSLPLEAEAAVHPEPGLLIRCFESGLSDPQLLIQRGFLDLIVSHLPLDSPVLQQRISKADLERLVAAAAGVVSRRDMSLNRRLWAWFLGPDPSAADVGDGAESPTQERHSTSVDPSTVHAAYFSRYGLAAL…
>Alen_Al4_ctg01_-_Alen_Al4_ctg01g815t1	MLGPRQASRLTIFIAPPSALIMLLPPLDVATSSTYAMSRGTYVSHPPRPSSTVSSTSSSSSTSSRAYTASPDFLSIQKLIQAVFRSQRIIVEQVERLQSRLQQVYLTKLADGTLLVLKCPPAANIRILRHEKNTLETEVKTLEILHEYTQLPVPQIIKYDSHGGQFGSPFVITNHIPGRKLSELSKYLTTAERSAIDRSLGVYVRSLTSLSATQFGTTRRVFDHKGCREWRETFLALLEAALRDAEDMLVTIPYDNVRYYINKHSHVLDEVTEPRLVAVNVCNPENILVNEQTKHITGLVGFSSVIWGDALMSGGLANGSEAFFEGFGECPMPTGGVKTRMLMYTVYRTILKISAHHYRANASIDELEVRRELVRALNDLAQT
>Alen_Al4_ctg01_-_Alen_Al4_ctg01g816t1	MTDAAPTKRKAEADARGDGESKRSKGKKRWEMPRRGNAEARQINPGDVGIWATCAMKKEAPTVADLRDLFQLYATKLYGEQAVNGVIEDDGSDVGGDIEAEINKELADIRKPAVKPLFTSVKLDTQCLVFFKTRAPVDPVSFVHRICQDTADGVQHKNCRFVKRLTPITGIEKANQKGLELVAEQVLAPHFHGESNAGKKFAIRPTIRNNKDFKRDDVIKTVAAAVGPGHKVDLHGYDLLIFVEIYKNVIGMSVVGPDFDKLKRYNIEELRQGLSASTTEAPAPAAPTENASELVSFDQGVLD
>Alen_Al4_ctg01_-_Alen_Al4_ctg01g817t1	MSYNKPEKDFGEGPKIHKIRITLTSRNVKSLEKVCQELIDRAKNKELRVKGPVRLPTKVLKVTTRKTPNGEGSKTWDTYEMRIHKRLIDLHAPTEVVKQIIINIEAGVEVEVTIAA
>Alen_Al4_ctg01_-_Alen_Al4_ctg01g818t1	MSLPQFAPFPDAKVRQSISPDEWQLYLDSWTSLTDLYLRLNDQQFASARQNVDSLGLFLISFFHELASDDSLATRVIALRKKSFFLLHRIWSGQDIEDAFLNWPILADVCHVFTKSEQFRKLLQMLWKRKTGAIEKSLQTAKTSLIRNLDSKRPEEAESTLNRIAPFLKASPDASIYMLTGSDFLDSLYSAYPNVPQSMQKKLVMTAYLGLTATLEGAKPNYSLLSDHMYSLKSSEEQEQRKEPGKKTLVADLVTNTPILEKIRDRTTAPEASRVKNTAASLSTFRSSSVARPKKLVRRKVDKGKSKAPDDDYGHGAFTGEMQIHRMSVVTQIQDLFPDLGAGFVVRLLDEYKDNVEEVTVHLLEDSLPPHLAEADRSEQLPKSTSAPQSHLPPRSSQQ…
>Alen_Al4_ctg01_-_Alen_Al4_ctg01g819t1	MVGKGEKQQKYIVHEQLLTTRSLFFKKAMSGDWIEAKERIVKLPEDDSSVFNIYIDLLYTNKITVIPDSGSGDATGGQEQNIFACLKEQNSLASLYVLAEKLQDIDAKNKTLAAMVASAFEKRSDGVMYSPGPDTIRTIYEGTPPGCLLRKLLVDIYTSKATDQWIEKCKDWPDEFMRELLISVLKKRERVSGLVDITDLTAYMESR
>Alen_Al4_ctg01_-_Alen_Al4_ctg01g820t1	MMKPRPIFSTIVVPARSNCMFARAQMPCSRSLHLQSAASRTQTQQRYESWNLALKSIRCASTSTSTHTKPRYGIQPPPLPKSKTAKSSVPAKKKSTRSSPPAKLHTASETAASSAVPAKRAATPPTSTTTTDALIKANDKLNPPSFTYAPELSVPARKAGQNYASYLFSCGKAYLTFYKTGISHTRQTLKLAKALRAKLAEQGKGVSKDVAGNGILSRSEWQVLRRSKRDLLRLPVMGFLILALGEWLPLVVIYLTPAIPEACRIPTQVERTLRKLESRRKDRLTRIAMDAQRLQTRDRTPATDSDAIRLAAAAEGLLSPEKKIGKAGGMAMASAIVPPEASQELSLFHLLLLSARLDCHPRILDILYLTPPKWMLQRNVSKKLAYLTRDDELIRRDGG…
>Alen_Al4_ctg01_-_Alen_Al4_ctg01g821t1	MTFSPPQQAEHIRHQQLTPESPRPQQVPSPANIPILSLDKQMDPVFDESAYNTQNATPAPQYPSAASHTLNVPTNPAPHFADHSHVSGFQDVGAQSAGGYAPAYSGAPGTQTQDTSSIQNYSVSHQAGASSTHDAQVGSSQDHSAYPFAHNNAYSAQPAPVQSAQGAHYQTEANAGGNVDVQALLDSLTPSANNAPSGHYASQMPSQSAQPQGSASASLPQPASNLPPRPPAQEKPATHPNYNPSDDIRSYHPGSQMPSNTQQRGNGQSQAPTPGGQQSSGASRQGPQSPAAPGAGQLQGGRSETPDDEDIRWGPEVNRLYEAFLDQERKFVTEGQWDQFPMGSRLFIGNLPTEKVTKRDIYHRFYRHGKLAQISIKQAYGFVQFLDSESCRRALDTEQ…
>Alen_Al4_ctg01_-_Alen_Al4_ctg01g822t1	MRFFCGRPGVSLIPVIKTPQAVQPRWLSARGGSSSSSSSSSSSSSSGTSSDEELQKARAWLAALHADVIPLKTIGELSFSRSSGPGGQNVNKVNSKATLRVPLGALLHHVPTALHGEISRSRYVAAKSNDIIVQADDSRKQIDNAHSCYKRLYDAIVEAGHVAVPNETSAEQMRHVKKLQKADNERRLKSKKQQSAKKGSRRGRGDD
>Alen_Al4_ctg01_-_Alen_Al4_ctg01g823t1	MAGPSDKARFYLEQSATELNELERKKIFTREEIKSIAKKRSDFEHIINARGSHPTDYMRYIEFEKNIDALRQKRIKRLGIRHKGAGQRSIYFLYNRATKKFSGDLTLWLHYIDFARKDKAYRRLSDIFTSVVRLHPTKPELWTLAANYFMDSQADITNARSYMQRGLRFCKNAENMWLDYAKLETIYVGKIAGRRKILGLDVDRTKKQQTDHEDTNMIALPDITAEDINPSLKQDDGVDEVALQNLASAPVLTGAIPLAIFDSAMKQFQSRPKVVEKFFDMFAEFDQLACIPRILHHVRDYLQQTHPQAVENAICTFRMQLFGQYPGSPEFPVVLGDAFDVISSAIDSYPNEATRLAEAAVRQLLTIQRSSADIDPALQKAIRSTLRKYVKVLGGADGD…
>Alen_Al4_ctg01_-_Alen_Al4_ctg01g824t1	MAPKFRDGDTVASFNGKWVSYVHTAMAYAAFIGALIVGMWLHYHKIVQNEIAGYPEEWFPSVSATIGDRYPERSVFMLFIALTSGPRFALVGLWYILTRRPNSALPKFVAGVGIFRTLTCGGWTYVTSTDDHDWHDIFMISYLVATLPWTIGCFALSPRNPTAIKYRKLFAGSFFATLVPLVYFFIQHKVHRIPGAYTVYAFFEWSLVLLDVAFDAVTMIEFANFEIVVKDVRGVSRGAGNKAVSDAVLEKEKDKEIGAVFSGAFSWVGFFDAAADVYTGFVFWSMLTALGVCVWYFPLWHMGISGYEVMVMSTISPFLLCVRSLRFLVVRHVRICHLLSLSGLLSFLAKSPENRLFSAGFGVWMACLSWAATFYGERSQPHRLESRISAFSLGLIASS…
>Alen_Al4_ctg01_-_Alen_Al4_ctg01g825t1	MFRTRPSLPRLSQRCTKLNKACISRASAGAKAGRTSHWTPEKLATTEKYPLTLELFEKMHPNTEEPARRTSRGQARPKKTSITTRHARTQLVSPDLCDDVFKYYGKSLEVHRGCDILDINPGAGLWSQKLHAFLQPRSHVLLEPNPDRFHSFLDPLLKAPGSKYKLVQKDTTELQSYSQLIDEGLFPEQTRVDPEDGNRQEVNTTLLVTGTLAWDPTLPGMAFDSMAKQLYNLFSSAVRTNDLFHAFGRVRTLFWVAADDFRPMLAESSAHFSKNNCLLEMTHDTQQVVNGLRSKRGLGKGTSGREPQYEIESTIGALQRGRENGMSLPKHRQDTIHQIAAEIEEITAGTGRTKYTWLHEYLVTKHREGDSAFGMLPDSFFVHTDEAKALQAKYPDLDL…
>Alen_Al4_ctg01_-_Alen_Al4_ctg01g826t1	MASQTDTNILIIGAGTWGCSIALELARRGHSNITVLDGGSFPSAISAGNDLNKIAEEASEPSQDDSDEDFFWHRVHQIAMKAWKHDALFAPFYHATGFIDAAVSDSAYERCIKYAKSEDAELVSLNTKEDFQKTMPDGVLQGDFPGWRGFWKQCGAGWVFASGAMKAMHAEAIKLGVQFVTGDQKGKVEALLFNQEQNLVSGARTADSTCHTAKHTVLSAGANSDLLLDFKEQLRPTAWTLAHIPLSVEEAALYKDLPVLYGVDRGFFIEPDAEKHEMKLCDEHPGYINPVIEKDRFRSVPFARHQIPIEAEERMRLLLRETMPQLAERAFSSARLCWDADTVDRRFLIDKHPEIENLVVAVGGSGNGFMTCPAVGVLVADVLEPKGEVEERVRKMLGW…
>Alen_Al4_ctg01_-_Alen_Al4_ctg01g827t1	MSRIQPSLSLFRACTAPRPATHRAALRYTTAAPASTQTHPPSASRAADLAAIEAITESDSAQPAAADPFRPSHPSKSKTLKTAARTAKTVPFTPATQPQMPLSPPPYHVERSHQKNLPIYTDYKRGGNLHTTTVRKVTGDPHALRDDLQAWLAKKKDEDVKVNALTGHVVVKGHHKAEIAEFLQGRGM
>Alen_Al4_ctg01_-_Alen_Al4_ctg01g828t1	MADAATSGSVAEQYSLLPRLMPNLDRHLLFPLLNFSSDEDAEQTPEQKQLLLALLSPTNMTDFVGQLHQDVHGLDDLPAEFAQKREQVLSKRDELEAATAKISELLDDENVVTNLRSDKAQNLQYLKDSHGITLDDVNRLYEFGQFQYSCGVYPHAAELLYRFRVLTTDNDKEREATWGKLACEILSVNWDSAIEEINKIKEQIDTRLFNNPLAQLQHRTWLLHWSLFPLFNHEPAREPLTEMFFSPAYINTIQTNCPWILRYLAAAVITARNKARNSNQYQRQLKDLVRIVRQEGYEYTDPVTDFIKALYIDFDFEEAQKKLSETEEILKNDFFLLGAADTFVDAARHLISESYCKIHQRIDIKDLSTRLGLSQDEGEKWIVNLIRDTRVDAKIDYQA…
>Alen_Al4_ctg01_-_Alen_Al4_ctg01g829t1	MMNIFRLITLISFTTLLTALPAPLPLSSAAITAPQYQPDHLNSAPPAGSLAATTPPSLTKDALRAPKKPPQKCILICTHARCDLLCANPPSRTLTSTSTSPSASTSNDTQPVDTEDMLNTPDELTTPSTNNTLPPPNLDHHLSTASPVILTTPLPPGKDAIIFGQKTQDQKCAWYCSAGTSSCGEECWAVDDVTGVIGYTDGGADVGNDGGEFVKGAEEGESCEVVDKDKEGVGRLVVCFLPSASIENENGGGGEKGDSVGKGKGMSMSMTLNGMRCTLYWRDRMPHLVCRGTWIGID
>Alen_Al4_ctg01_-_Alen_Al4_ctg01g830t1	MPTPSVTSEVFSPPTSSFPGTSIPSPTNHANTTVIASSGLWNSTSARSTVVVTSRVVITVTSLGTTSSVPAVTSTKSVTATSCKLTNEGVIWCTNLPSTSATSSTTFGTFTDGTATSFPVDTPTSSPVGPPLSTGASKSTKVSLSTGVSLSTGPQSSYLPSTTPPYGNGTSLTSSRVTNTAPASSPTFTSPSNATTSGYYGIPSVSASTPSWNQTSSIATDTFTAPTGTTVTETGTISKSTTGTSSGTSSGKSSGTSPGTSSSPSYTYTWPSYSYSEITPSASKSSTPSSSFVTTPIPTPTPSSSKIWYTTHISIPELPSSITFEFPSGSPTPSYSRRSSSSSSPSSPSSSFPSSSSSSSSHSSSSSHSSSFSYSYSYSTARSSTRSTLTSTRSSSSSA…
>Alen_Al4_ctg01_-_Alen_Al4_ctg01g831t1	MPAERRSFTATRPVKTERTHEENQERAYIAASRRSDRSLEARIESARRASEIHKKRTGRALRVTEQDVINEEMYEEEDDDLPTQYQRLNAHLHTTSVMFNKKLHDYIATQHGVRNMFMSQYQNPQFSPLGGQFPPPNNGAFPQTNNWLNPTMMPPQQFNQQTANLNSNQQSQSSHANASVRSSPYHIPQRPQPHQRSASIAVPAFDAATPQDARRRSLPAQAGTDGQSRPDLSRGSSFAQHQPTSPHTDMSASPQLGSGQRTPQLQVDTDTPTSNAFSAMNFPMGSQMIGGPNPLSMSLPPESQQFVGSILDPNDPRTAMFMNGSEHLAQPFAPTYTYNPNYSPKALKSGSPMTLSMPQTGIKSEAGTESCAPISSGLYTNDSFLTPGNEGYSAFFDFQ…
>Alen_Al4_ctg01_-_Alen_Al4_ctg01g832t1	MRSSQVASLLLSLASFPISSNALEGKPALILVPGTFHRASVYDEVKSQLEDVGYEHVNAIDLPSNGYDAADVERTADVAVVTKMLESMLEDGEDVILVGNSYGATVIMEAVKDFEDWSAVSAGGKIDREGRILGLIMLSGYIPTIAEVNHNPPRPDIRIIGAPFFNYHVSLNGTPTLVTWDKDLVTYPPSLTFYNLLNASAADYWASQLLPASFKALNATGTYIPYDGSFRTLYVVGEHDNSVSPAFAQSYLDQEGARFEVAMVDGDHVSMLSRPEAVVDVVRRFAEGTVAGGGQER
>Alen_Al4_ctg01_-_Alen_Al4_ctg01g833t1	MSSSIDASSKFQNTAVFLVDVYNEFLHPSGKIYKFVSESLATTNAIFHLDELVKTARKVQVPIYYALHQTWKEGNYEGWQRMNATTTGFFDSRALQEGSWGARIFQGLEPDILGNKDVVVSKHWNSSGFANTDLDYQLRQRNITHLVIAGMIANTCVESTARYARELGYHVTLLSDATAGFSNDHTNAATELIWPIISDEVKTIQEWTSEI
>Alen_Al4_ctg01_-_Alen_Al4_ctg01g834t1	MSSLKNIAWVGEVAKAGDFDIKLLVRNEVSTYDNLPKGLHSIHQVDYSDHKSLVRHLQAQDAVIVFTSFVPGNEFDKKHIALVNATIDAGVKYFIPSEWALDTAGKMESTPDGHGPTLPTDMVLAPKRVSHNYLLCRAAEGKLKFCVVYPGVLFELSFQNGIFAFDFTTHSALLPDNGINPFPATTLETLSKVIMSLFNTPSLISNEFYHVADGVLTQQYVFHVVEKEMGVLWARTSYSTKEFRNAALANIQKDVYGPSEYANSLMTPFFGGLQVWRHLDNDKLKVPDGQVDVRAELISLVQKQL
>Alen_Al4_ctg01_-_Alen_Al4_ctg01g835t1	MTSALRGPYVGIDPSSSDQEPAIELKRTITGRKTRSGPNASVAEMLKALIPAGLMIVAVLWINTAHIYGLFRNQGAYVHRAKVALADFDGGSFGEALRISAATNNGSYGYPTYVNVGTTGSSPEQIRDEVFKGTYWAAIVVQPGATARFEEAVNGSVQAYDSSDVYTYYLLDARYYTLYSASILSTSVTTASAASGIFSAQFIAPIIASGEHANTTAALSALAGPARAVEMPAASQLFADLDDKAFMNTIGAVLPILMQFFFIMAWNGVCNGMHLYAAYDLRTHILARLFWSTFWPIITSLCTAGWTFAFRGGYHMDAKMFFAFWAVTWVFSMINFDVLDIITGFIPMAFVPFLFLTWVIFNVAASLGPIEILHHWFRISYFFPSLHWYRTFITIITQG…
>Alen_Al4_ctg01_-_Alen_Al4_ctg01g836t1	MATTDPLSVLVFSKTAGYRHASISTGIASLKRLADQTGLFRVTASEDASLFTSSILSQYRILVLLHTSGNFLTNNQLSTLQEYVRSGGGVLAIHGSAAGMPSSSWYGKLIGAHFDMHPDPEIGSFLPIPPSVSSHPIVAEREPPKQWMDEWYNFKSHPSNNTNLQILMRGDTKSFKGGKHGDDHPLAWYQEFEGGRSVYLALGHFDEAYADPWFMGMVKRGLLWAAGREETSK
>Alen_Al4_ctg01_-_Alen_Al4_ctg01g837t1	MAGFPETSTSHPIAVASYDTALCVLPPIDQCEHIDNLRELYDKAYGRWPAHVNLIYPFVALEHLPEARQRIQTQLQRKVESSRTGSVVLNSAGLFKQRHNSTAIIQEPREPSEGPLEKLRSLALQALGHKPKPHNFHLTIGQTEDNSMSSLEFLLSKVRLLPTLDFEIGFLAILVRERTSGELSADRMRLWGLVDVVSPGTVTMAQIPEYWLKNSLASSANADPDGSRYEMSDSTTAFSRAIQPVRTFFFDETLGLWSRMTKVGRSSNRPSSLTVSSYNVLVDSEYPPVRDRDHLLISTLQSDSAKADILILQEVSDDFLSFLLNNAEFRNQYPYASHGPPSQPDIGPLPSLRNVVIVSKWLFRWELVPFQRKHKGAVVAVFDTIMPSDSLVVAGVHLT…
>Alen_Al4_ctg01_-_Alen_Al4_ctg01g838t1	MIRSSTGRIAAIVIIFLFVVALFQNDDAGTYAFLPSLSKTTKLPSYPPTWLRERMALSEKSWKKSVELRESMAASHPANPKIPFFPTDFLKYPFTVWDFFPATWTCPHDFQRVGRLGDGGKWVCGMSIYENIPKPKPISVEAVEVREAAIQAAEQGLVIYSFGINGESSFEAEMLERVPSARIWGYDFSVEGWGKQIPTAERHRTFFKKVGLGKEDKHEASPAFWTLPALMKENNHTYIDILKIDIEGSEYDALDTFMDAFDGIQSASGKSVLPIGQVMIELHLGNGDITDKVDFERFRKWWERLERMGMRPAWIEINLFAVTLGKNKSNPRCTEYVWVNAKDERSVLWRS
>Alen_Al4_ctg01_-_Alen_Al4_ctg01g839t1	MFTLRFTLFVAALVPLTSGQGDTDYCCATLSRSSLKPRLLYPGQTSYESRIDSYFDVKQQSMMPNCIVQPKNAKEVALAVKTLVSASRATPCKFAIRSGGSTPYAGASNIEDGVTIDLQYINIVQYDADNSLVKVGPGARWIDVFSTLEPLGVITTGGRSSTVGVGGLTLGGGISYFSPEHGLICDNVLEFEVVLADGRIVTASKTQNADLFTVLKGGNNNFGIVTQFKFRTFDYKGMWGGLVVYPETTIQDQFKALINFSDRVDKNPKSAAIVMPVYQSSVGFDLILNAYDHAEPVVRPAAYDEFLAIPGNISDTTALTNMSNLAAALAGSTTSRVYFGTLTFANDLRVMTEAHNIYMDVLANLKARATGEWQIYVLYQPLPPAYWKDSAARGGNILG…
>Alen_Al4_ctg01_-_Alen_Al4_ctg01g840t1	MAAAASETSVYFKPALCANQHNTNGTFAQCTNDGSSTCGGCQIVQYCSKECQKADWPHHKTTCKSALMKSSWKPRWYYECRMPAFVGNGPPLVQFGTKKYLWGNMPALDILKLKDNEGNIDTKQDLELLFAASGDPRNVIKTIVGLPPGHKGKCVVIINDMDFDIVARNAIILIIALHYDTEVAVPMIIHVWYSALLPSVMVQSLQSDILPMIKDVCDKTNNKARDSLQAKTFNVHGRTLRLVLKKEEWMRLVTYFHVPEGLSAEKAQTIRRDITLAPSRIDYRERAMLWWSPALRQGEMYFRESGVLLPYGCSTAAFDTPNPTLFQAHDWPMMDNASPRHGWAHAEYCKHSPAAKADHFGAVFLHLRDLLTKFCERLGKVRISFELLCINAVGITNHV…
>Alen_Al4_ctg01_-_Alen_Al4_ctg01g841t1	MPTAIVTGATGIQGREIVLELAKDRQQWPTVHALSRSKKERYPETVLHHHIDLMSSPDEMANDLKDVQGSHVFFAAYMQKDTEKENWDVNGAILSNFLQALVKTGAIQSVERIILLTGAKQYGVHLGVPKQPMLESDPWLTDSKWPPNFYYNQQNILHSFCKEHNKDWTVTYPNDVIGYAVDNYMNLATAIALYAVVSKELDPNSEGLVFPGSPAFYTKFDCFTSAKLHAQFCAWAALEPSTANEAFNVVNGDVESWQNLWPKVANYFGSNVKSNQFKSGASSSLLKYVAGDASSTSKLAPEPPITVQSSTSGLDGTSVLAQSVVEQHIDLEKWSQRQDVKDAWCRIAEREGLEEDAFEKVTWGFLGFALGRNYDLIISMSKARKAGWTGYVDTWESLA…
>Alen_Al4_ctg01_-_Alen_Al4_ctg01g842t1	MAPWFALVEAWAVAALIRSPTFNRAIQKAYRKINKIPDHEPKNGLGRTGPSALDHFKEEVKNQFKELTWQKRGPPK
>Alen_Al4_ctg01_-_Alen_Al4_ctg01g843t1	MHTPRTRPAHALHTPCTRPAHRLQQSADRLDRRESGCRASAPTPSTDHDPVRLPRRTFGPPPPVTSITIASPTLLVPPPPRLQVRLETDRNAFTLHKLRALRRKAKLKGGSLRTDPAATGIMSAPSSVPVSPASSKRSRSKDSTRSATYASLNTPTPTTAFNTPAMSTHSLLPPLTVATSSNPDHSPDPTPYPAFLRPRRDANLDTKWNDLEWAQMNRLREGLSVTDTDQPSPWARCSGDTYAPRNRYVNVDPYQANRVHLDVPDGVFDYINASPITLHSTKSKTPLRYIATQGPKADSWSHFWRMLWSENESPAVIVMVTRTHEQAREKCYPYYPSSTSDPDLRINEHDEFGDGFIHNLHLAHLSHDDASRTEVREIDMTTEDGSESRKIWHLLFEAW…
>Alen_Al4_ctg01_-_Alen_Al4_ctg01g844t1	MSETGRVEPPSQPSPSAALNKPATATIDDAPKKPDGVEQQDFANPTLSIIGNASRSPSYSGVSSPSREGTPPPLPPRRQLGVPASLSRPASSHSVKRAPSRPQLLSKATTQLSVTNTQAFGNDARDDSTSPASSKPRNNLPSLPSNATSDAEDSASVRSYAPTIAGGESILGEVMGAAEKSKQEETLLRSLGHRFADAQSQNMFPPDPEFESSFDREFEQVDDMAVDGSNEEKVMRQWRAKLKHFLVLSSAGKPIYSRHGDDQLITNYIGVVQTIISFYQSTKDTLRGFTAGDVRFVVMSKGPLNLVAITRLAESDSQLRAQLEALYMQILSTLTLPSMERMFAARANYDLRRPLQGTETLLSALADGFTRGSPSTLLSALECLKLRKSHRNTINNSLL…
>Alen_Al4_ctg01_-_Alen_Al4_ctg01g845t1	MSTANAFTFLPLGAIIQEFRVNGINIVQGFKTPEQYMQYNGPYFGETIGRIANRVAKGKINDLNGQSYQLPVNNGPNSLHGGEQGWGKHEFEGPVNTERNGQDAVLFKYLSKNGEEGYPGTVQVSVWYVQKKEEVNGAQQEVLYIEYEAELVGDEVEETAINMTNHSYFNLTGKPSIAGTEITLIANKYQVVDGGGIPTGPIEDYPGITAGKSFTLGETEPDVDDCFVANTDASSVPVDTRSSPLQKLVSAYHPESRIHLEVYSTEPAFQFYTGKYIDVPAVEDLPKRAARSGFCVEPSRYVNAINVPEYRSMMVLKKGQKYGAKIVYRGWSA
>Alen_Al4_ctg01_-_Alen_Al4_ctg01g846t1	MSSQRSSSMEAQDNIRKRVCKACDRCRLKKSKCDGASPCSRCKADNAICVFGERKKSQDKVYPKGYVEMLEQQQAQLVAGLRELYTRLQTGQSWPGQPLREAQNGHPLTHDILERLDLLHGPSENSNNYEGFEEDCSRMQHKLLERGAPLFRRRGSVSSDSEHGHTSSPSSYSGTPTTRQFPFADPFARNNAPPTPPMNSPFPRQSQMMAPPIKQESPMVSSTFMNTGALDPSSLSRTAWMNDSMMMEEPVDFSKPMYGFEAFNNYDQIMMVDPISMGPNDPMMPDWNATSDLDFNNFIQNPVGA
>Alen_Al4_ctg01_-_Alen_Al4_ctg01g847t1	MADAEQQYQLSQEQIDFFLENGWLKLSECFTPEQAEDLQSTLWTRLGMNKNDMSTWHTERTNMPHWKEFQVEEFAPRAWGGICSLLGGSHKIDANNSVSTWKDGFIVNLGTPEKHNKLVKPQELDNWHVDGDFFVHYLDSPEQALLVIPLWTDIVPGGGGTMICPAAIPHIAKHLYKNPEGVSPRMTPRSENPEFTQEQGLQWYIDLAKSMRDEDFVEVTGEVGDVFLLHPLMLHSASNNMLRKVRVITNPPVSVKYPFVFDREDGNYSAVERKTLRALGKDRLAGWKIESERQRIVPERVKIQERMKREEEERLKKLKEGKDSVEVSKQVPTLA
>Alen_Al4_ctg01_-_Alen_Al4_ctg01g848t1	MHWSIAVLSYVLGSALAQSSSSGYNSTAPTGPAVLTADIISSMGNNTLFDRWRPTYHFISPAGWMNDPCGMMYDPTTDTYHLHYQFHPNHVNWGNISWGHATSKDLVSWTDVGGWENDEAQSVGTGPDPDSRNSSYYGLGIFSGSAQPYNLTGGQDGTLIAFYTAVQYLPTNWALPYINGTEKQAIVISNDGGETWEQYEGNPIISEHPEGWNVTGWRDPFVEPWPEMDAILGQDEPHWYMVLGSGIKGEGGGGRIPFYSAPQSNLTDWTFLGALWEPERNETLGSLLETGTYGFNFEVSNFFSLTDEDDDVHYYVLMGTEGGNLTWHPRAQWGLWNEGQVSRRENGSAEFTPVSGGVIDSGLLYAVTSFNDTKNNRRVQWGWATEENNGFGIQQNGYQ…
>Alen_Al4_ctg01_-_Alen_Al4_ctg01g849t1	MGRLKLYVTGSAVMANIVLARAYYERPNFYSAAVYISQSTGSLMFLVNLMLIVAASFGYGLQRLFYGPLRPIETEQLYDKAWFAVSETLLAMTIFRDDIGLWFFTMFLCLLAGKVWQWIGEGRVEFLEQQPPANPRLFHARLASSLIVSVFFDVFMTQYCVTSILSAARPGVMVMFGFEYVLLAIASISTLMRYGLSLVELAITQRQEKARDEAQRVAREQSRQQAAAEGAEPPTEVEDDEDEADVPGWEEKGRWVFYLDLATDFVKASVYLGFFTVLMTFYGIPIHIMRDLFMSIRSLIKRINDFIQYRNATRDMNTRYPDATGDDLSRENICIVCREEMRPWTPPGDEGAQPGRRVDERQRPKKLPCGHILHFSCLRSWLERQQVCPTCRRPVLGEP…
>Alen_Al4_ctg01_-_Alen_Al4_ctg01g850t1	MVVRTQEKPQKAEDEGHVSNCVNNLIEAFTNGLNIFKRLRERRRKHKSRKQDQTPEPINSAELQLSNSLRRGPQDLAERYEECYGQRGMGHRFAKGDSIAHASLAEILMRLNTGLVGIITTFLHHDQKGSHSAMNLNYKSLTDLSEASRRDALVSMSQLYHRLSHSQLQIHPALRSKTPQYCDSSDSNSSSSNSRDKKKSLSARRPSGSHVTRMPIKSSSQPQLCVVRSKSRNTSRKDSTSSSSSITSKPTSKSSSPYASPLQSPVPEYAVLDPMIQGRSDFKNAAYARGAYADVPAPLNVARKRVDSLDVVRPVAWSPYAQPYDYFSYMPEHVHTPTPALPSFTSTPRKGSATPGVRKAPPIPAKPSSLASSSKPPPVSASAPMKRRLDKVTPSSYTF…
>Alen_Al4_ctg01_-_Alen_Al4_ctg01g851t1	MFYRIILALPFLSLTFLALASPLEQREAAPGLIDDLLRGILSQVQQLIKDVLAGAKSGIDNTKSNKPVVCLSVIDSCCAWYDVSKELTNLFLEADGQCNDNARAAIRFGFHDAGSWSKTSPNGGADGSLLMDFGEETRPENNGLQGIRLVLKGVQSKYKVGYADLVQYAHNHATISCPKGPRVRTFVGRKDATQAAPTGLLPDVNDSADNLIALFQTKGFSAHDLAALVGAHASAKQRFVDPAQANKPLDTTPGVWDVEFYNDTLQTTPSDKIFVLPSDKVLSVHPKINDEWKSFVGNQPHWNEDYAKAYFRMSLNGVTNLKDLRDCTKTLPASRPNFVVPKQR
>Alen_Al4_ctg01_-_Alen_Al4_ctg01g852t1	MPLGFERINERTQRPNALINFIRTIPGPSSSTAEQILSRVAAVCYPFMKANMILVQALEEFPYNMEFVGRNFNAGEVIQLVLRDRNGQWLPQHMVEMVMVHELAHCKQMNHSKAFWKVRDAYAVDLRALWAKGYTGEGIWGRGRGLDTGSIHTSQVDIGDVPEHLCGGTYGRRSKKRGRGKERETISYAERKQRRILKKFGAGGQSLGADDQTKVKLEGGVPKKGKPRVAGSARGRELRAAAALARFEPVKKEKEETTIKKETSDSETEDEYETIDQDDAALDVDGTKLVDDKGRALVKICKDEDDKDGNARREMDEIQGIVPQQKPAVDKSASKAPTLRPGAAKQSSVSGQPPSKTTGSSTAQVLSLEEGRVKSRPSAFQHVDSGLEFYGFSPKSQSY…
>Alen_Al4_ctg01_-_Alen_Al4_ctg01g853t1	MVSQVDQEIEHPESGSGRVLKDLFAGAVGGVAQVLLGQPFDIVKVRLQTTQQYSGALDAATSIYKNEGALAFYKGTLTPLIGIGACVSVQFGGFNFARRYFEAQNTAKTGNGALSYSQYYAAGAFAGIANTVLSSPIEHIRIRLQTQPSGAARLYHGPMDCVRKLSAHQGVLGGVYRGTAVTFLREAQAYGVWFTTFEYLMNADAARNHIKREDISTLKVAAYGGLAGEMLWISSYPFDVVKSKMQSDGFGKDQKYKSMRDCFAKVWAHEGARGFWKGIGPTLLRAMPVSAGTFATVEVTMRLIS
>Alen_Al4_ctg01_-_Alen_Al4_ctg01g854t1	MEEQDRITITICGDGGCGKSSITLRLVRSEWTSDYDPTIEDSYSVTRSIDGHPYHLMLTDTAGQEEYRGLWASSNLSSDAFLLVYDMTSPSSLSALDYFMEMITMETETRIDSGRTPPVKIVAANKSDLQSLRAVDAKTGLEWARQRGCGFMETSARDMVNIEETFALLVRRVVEARVNANRGASLPAAFSSHAPPRLGDGAREKGRGSGAEEGEKGAKTGFWNKLRCW
>Alen_Al4_ctg01_-_Alen_Al4_ctg01g855t1	MNRYPYSTQPYPDPSTTAAGLMNLAGADAGPYPVGAIEGQSLDDIVSQNDNANRRRSMPVYVNQHPRHSHPPPMHMASPTRSLSMMNFGDPNPTNLDDFAFDMSPAPGIDNMMPDNMMRNTSFPTPAADTHPDRIPPADLALKTHFPHAASPYSTMAAPASNYASPIHANPDLDLAMSPYPNTLNMPLDMDDSLHSMMQSDMHMFQNNHFNSPMMDSPVTSNQTPVTSNQTPVTSNQTPVTSNQTPITSNQTPITSNQTPITSNQTPINQGTDFIGPLPAPQRGANVVGQHQFGGMQPQNQHQNQHQNQHQNQHQNQHPPPNQNQNQNQNQSLNQNQNLNQNQPQNQPQNQNHNHNRFKSPSMSNTPDGRSGTSAPSLPSRQNSHGQDQSRSSREQSQQ…
>Alen_Al4_ctg01_-_Alen_Al4_ctg01g856t1	MLWVPGESEPPDQLTCVLPALSACLTTRRREDPLSAAKTLAPTFAHAPCLHCAASTRPARHVDDQRHVDDQHHDPTAPARPEGPRPRPHAAPPPLSVYHLHHLHHLPRHTARRPLPYEQLLRAEYQSGVGLVNPQPPSTPSPPSSLINNVAEQYHAHKLHAKHIGTLGADVAPHYQPHTLLTNPPAPADVTLELLLASEAHQGHATSLWNPANARYIHGIRQGVHIISLEVTAAHLRRAAKVVQELAHRGGMVLFVGTRDGQDRAVARAAELAKGYHLFERWIPGSITNGKQILGRCRTKVVNEHDADVPGFDDQLYDRPVLRPDLVVCLNPLENYVLLHECALNNIPTIGVIDTNADPTWVTYPIPANDDSLRCIQVIAGVLGRAGEAGQKQRLAAAA…
>Alen_Al4_ctg01_-_Alen_Al4_ctg01g857t1	MLASELAMGTPKSLPITSLESVHIKRRTRKLSLSLRSSKENANEHRPPVNSRKHRREKYAFLSILFLANLAVSLMSMNFSRFYWILLPITLFRPFVDSTEITLLVIFYLIRRLYPTPPKVPDTPENLAYLLTCYNETSTELTRSLASLADQQNLETHNKAVIIVCDGRCNGRGMEKTTADQLKEDVIENATTTSIPSAYTAWDGKPMDVELIRGTFKSLDVLCIVKEENRGKRDSLILIRSFLHKLNQQATNPHQPIGIFSPQLFTHMRHFFQSLSMPTVQHIIGIDADTRFDPHCITNLVQTARESPKIVGVSGFVLADPTITSPFSLPFIYQTTEYRTGQIRRRFRQSLMTRKVTCLPGCCQLLRVVEETCGDELLSRFGYYPLESDTLFRTIQSMT…
>Alen_Al4_ctg01_-_Alen_Al4_ctg01g858t1	MFMSLRAHTLKRLSCASSPAPTPRLPTYLSRSSTLLAPRNLTTSVPRAQRHARTTPPASFQQSGSGLWTATVVIGLAIGGALLVPVFRASPRPTTDERTSTRTSQFDITDITDITDITDITDSFLVMAPNTPAGRPGTLTPQEEEKLRELWALTMKVFGVHASPAETTNGVETPALPVAAPTTAAPAEKEKKKSKLSVFSRHKKDKTDKTADAESTPTSGASTPDIGRLSLSTDDDKFGQTADFKAAIANTPPEDLRNAFWSMVKHDHPDALLLRFLRARKWDVEKALVMMISTMHWRLEEMHVEDKIVKHGELGALTEASSTTDAKAKKNDEDFLVQLRMGKSYLHGLDKEGRPMCIVRARLHKAGEQTEESLEKFTVYTIETARLLLRPPIDTATIV…
>Alen_Al4_ctg01_-_Alen_Al4_ctg01g859t1	MASTTPTQEPPSSRDRRLRSRSPRSRPTTPLRPSSRSSLRDSAQRSRGASSTNALEGLQDGFAELSDAMADLEQNFVQLQLMHESLARFSESFAGFLYGMNMNAFCVDFPEAPVPDSFRRPQNHPSLNPSANLPNRRASGVEDVDATFLTTDTSFVDNPPSSKAASKFKNAASPAPTPKKTAGRGRGIPTARGRGGIPTRGGTARGARGSGIARGSARGRGRGV
>Alen_Al4_ctg01_-_Alen_Al4_ctg01g860t1	MARRGVLAVATAALLLQLLPLAAAHGDEQHGETMDMSAHEAPAPQPQGDEPHSYWGLSEYAVLMYWHIALEILAWVVVLPIAVMLSIARSRYVLPSQFIFLVVNALALLIGVVYNHKTPELYENNAHGKTGWAITWIASAWVFMALIQSYMGRDQKHLFEDETTAPLNAANMAQYQRVKEEDLESPYRFSNDSGQGTERNSASLYGHSRSPSLEAEDQQFAGPTRRYTHDELDEMEDVSLEKPKSSLDSFFSRNVARFVAGKTAKVVRSLYVVFERTMVLQGLVAILSGTVVYGGIGHGGAVFNVLAHYVKGGIFFVYGFLTLGRWMGAFADLGWAWNMKPSKDVVGRRKASLPSAEFTESFVIWLYGCTNVFLEHLAAWGDEWTAQDLEHVSISVLFF…
>Alen_Al4_ctg01_-_Alen_Al4_ctg01g861t1	MDSDDGLKWFGEGFDGFPKKLPEDVVEYIIFIIDARLSDIQIRERLQAFQRALQDLKKKFLKEYIWQRDDIKLDLVREEDRWLLKGQTNYGDSVADEWLIVYFLRELSKEFKDAWIRIYDTDGEFLLIEAANALPKWLTPEVAEHRVWINTHRLLIVPLGKAEDPAPLKLQDALTVLKDTPGRPQHYAKVEKEAFHRLNNYPSAISENQHHATLPLPRKVAHILHTAPSYISSAVEAFYLRDPISLRLLQPEKSKSALIFPPEDFVQVSVRFTKVLYAQLLGQHWNSPPQYESAIENLVKSGHAQEKSEVAIKLTAGMQMLASHTFFADKKAVREINLLLEDLDNGDDTLPTDTEISAWPKREDDESWLDIDFSEFEKELQGKGGEKGFGDKNAQDNLK…
>Alen_Al4_ctg01_-_Alen_Al4_ctg01g862t1	MANFLPETPRTEVGDATRFTQNDLSFSREESFQAPAGRDELFKKMSGARTPRNPLAALRNPNAKNEFTPMLKSATANRTRQVTGLLNGKMTTPAAMKPGFRMSDSPLPEASALDMQSSSFDHSIDGRTQLPDPSSSAMSTPMALPRRAEGELDMGNGNGNVLTLREQEARLEQIDKENFGLKLKIHFLEENLKKMGPEFNVRTMEENVNLKSEKVTMSRDIKQYSKDLKAAEKELENYKQQLRDYAEKVKKRHADAGMREEMDELRRLAEERAADIERMEEKLEEARNAEDELEKVSIELENAQAEVSRRDQLLDEHEDQIEELEKKLKNAQGSSSADIEEKDRELKEQTERIAELEHSERELRQQADRVAELEQESHRLQEQAARIAGLEEQNYLLQK…
>Alen_Al4_ctg01_-_Alen_Al4_ctg01g863t1	MASRVLRPAFRAANNNMTAAARGFQTSAVLRQEKPLVAPVRRPVGAFRGGLFGFLLGTATAGAGMYYYVIDEYRVSNQLLTEDIYALQSAVQRIEGYVRTLEDKVAEKKR
>Alen_Al4_ctg01_-_Alen_Al4_ctg01g864t1	MVKITSALSLLTMAASVMANPIAVEQNLVARADIGDKSSAVAAIGDVVNKVVQLVQGMVNKDLERRRTFTQTTAKDVAAQFPGHSVIVCNVGYSLTGSGEQLVYSTSYNAKVGSDVTFDVIVFKSPKTFDRQGNGGYENWAFYVDGSCNENGGHVECL
>Alen_Al4_ctg01_-_Alen_Al4_ctg01g865t1	MSSPSLPRTPFTVQALMLFAIAQHYQDLRLESRKTLDLAILIALELDMNRRDFARVYGEGDPVLEESWRRTWYILSVVDQHFAIVMNLPIYQLANMPNEVELPCDDEFFEAGRIPAPATTWEEFEHREFADLEVVYSSIAYLFDLGRTLTHIMNTFANSGQFSNELIDICDAKIAIWQSLLPSVKKDPMRRNGQVDEVMYMAHMISAIVLMTMHRPLSSLVYNAAELSTTAFHAPTPYFIPPVSGRSTHTARALKAAELQTKLLAIPCTIEKHNVFSMCICAQIATAQISACNNLLEDHALLIARDRVKLSIGFLNAMGSVWKLGKAMAKEVRAVARSTLSAPPSTLAVQADAAVEIELPRDELIWPIDPSAAIDIYSGIVLPMDWETVSSGTGSYASS…
>Alen_Al4_ctg01_-_Alen_Al4_ctg01g866t1	MVEGAPAHGTVAHLLPLTYKRYVSEWLEEDTPSFDYGGFVVGEELSEAKLLGKSEGIVAGVPFFDEVFKQLNCTVEWHVKEGDSVGEKITHCATVRGPVRNLLLGERVALNTLARCSGIATKSNRLLTLLRKAGYQNILAGTRKTTPGFRLVEKYGMLVGGVDAHRVDLSAMTMLKDNHIVAAGSITNAVRAAKSAGGFAIKVEVECQSFEEADEAIAAGADIVMLDNFTPDGVKVAAAQLKEKWGRGTGDRKAFLVEVSGGLTEHNVEKYVCGDIDIVSTSSIHQGVPHVDFSLKIVPKTKKDGGESLEV
>Alen_Al4_ctg01_-_Alen_Al4_ctg01g867t1	MAPRKKTEKEEKATGAEGSDMILHYLRRENRPYSAIDVSSNLHNKVTKAAAAKLLKDLHEQKQIEGRPAGKQIVYHALQDPDDAVSPEQLVNYDARITQLQTQTTDLQALTKTLRSTLATLNSTLGTADMLSNIASLEHEKTEVVTRLESLRAGHAKKVTAEERVKVEKDWKIVRGVMGRREKIAKDFWAMVKEGTEGAEALEELREGWGMGD
>Alen_Al4_ctg01_-_Alen_Al4_ctg01g868t1	MRANTTQKAYDEAFLACSTAVYFESQHNEKEALRSWKIALDHIYYHNARRNPTTYRPSSETERALLESLRQLELQCKDRVDLLEALKKSREESKESLSSTDAQAPTPPPHGVPLAQTDTNAASEWLGGASIPPVVQSDLARPPPLPTRPSMASRKSSGNTSKRINSLTQTMSNSTLTPGPSEEKKSRTPSPEKKGSRMLRTLRPSREGKPASKMPTSMRSRPDASKAATLAFGSRTAAASSSKSSLSVPKVATPPVHVSPRSSMEIPPATPQPETPLMQPAIQDSPKPAPFYFQTREGSASTNYAVPAPRYNSDTERPKPPPIPRKAAPPPPPIPQKPAELGRTQSSQASPALPPLPAFPSYRKEYPPAQLDPRLLAASAAARSYSDLGSSKYGNKEID…
>Alen_Al4_ctg01_-_Alen_Al4_ctg01g869t1	MSQLLPIRRSVLRLPLSTPRYPVIARALAHHSRQSSTFRPTNIAELLRPASPLSSAPQRELPENETLTVHGYVRSVRKQKRVAFAVIGDGSTLQTVQAVLSPQLAEDLSTGTAVTVTGKWKQSPGGKQSHELQVEGIRVLGANDATTSPIQKKYQSAEYLRTIPHLRPRLPFNALILRLRSLVTAQVTNYFAKNDFIQCHPPIITSSDCEGAGEVFTVEPAASESTSAPVPGSSSQPNKLPDPFFGSPKYLTVSSQLHLEALAQSVDKVWTLSPTFRAEKSDTARHLSEFYMLEAELAFTDNLGDVMNVVENMLRSVATELQASHVGQELLEARARDQSEESTSVSHDALAQRWQGLINGPWPRIKYAEAIQNLKDATAQGKVHFDFSPEHEDGLQTEH…
>Alen_Al4_ctg01_-_Alen_Al4_ctg01g870t1	MSPSKPKPSEIAAEAKRVWMPYIWKNYIKDSKTSYLYPDATQIRASSEGRSTQRTRVAVMEGDPVNYALGWYQSAATSHCKKIPVVNVANEKRAGGDWESGLIAPEECFARRSNLVHALTMPWNAQLGKEENFYPIPQRGGIYSPEVFVFRGGADQDYAPFSEIQSLPVISVAPVRRPKLDESGTKYSFSQERELMCEKMRAVLRIASYCGHRNLVLGAFGLGPIFRNPATEVARMWRKLLFEDEEFYGVFQDIVFAIDSSLVGPPGKGCASDLDVFRREFDPSSIFPVRFQARV
>Alen_Al4_ctg01_-_Alen_Al4_ctg01g871t1	MAWLPWSSGSSEEGGVKKTAGGAFESPSRTNRKKCYEARDSFFECLDKNNILDSINTKSGREKAETFCSQFDKEFEKNCAHSWVEYFKKQRVVNYQKEQTIKRLESQGGEITAPQLPLPGQK
>Alen_Al4_ctg01_-_Alen_Al4_ctg01g872t1	MPRRRRPPRPGALADLSPTRIASQIVLLQLAYYACAAVLIVFTALVAGKEIGLDLLFSWETLRGDTTVGWTLGLVWILNSLTSAIFILLLIARSKLVLDFALTVHFIHLVVTSLYTHAIPSHLFWWALQTASATIMTSLGVWACQWRELRPINFGAKSTKPAADDGVGEARGSGRGRGRDGAGEYEMANMNDGDNNV
>Alen_Al4_ctg01_-_Alen_Al4_ctg01g873t1	MLSRYVLYVLCGVSGALSRAVPDVAQAPLLEGSQQQQQHYAKPHHLDVMIAFKRSGDDHEATWQFPLRQPLRGSLLQSNQWGDARKDVTAMSIVAVVDVETGRSAGLEELARIRCRVEPVFSEEEVSAAAASGVELGVWPHFRVEDGTANGFQRL
>Alen_Al4_ctg01_-_Alen_Al4_ctg01g874t1	MAGGYLNQLWEDSEQSPDGPRYLPLEGTFSDAGSSSRPHSQHRAQFPVQLPHEQQFGHPEQLFQQPTPLIPFSAVEDLHSHEPYTSSTFQDPFNRAFISNQPVVHEGYIPAPGTRDEDLYPHLPEEYRDSLFQDYDDSSDESDFERRLAEAEELREIEEKDDPEVDADYSEEDAEQDEGDPNEMEIDESYVEERAKPKAKRGRPSARGTRGGRRGRPPGRGRGGFHGSASTRGRLRGRKPGRPSGKRGPRAIADPGPEFRDLQRSANERFIARDGFHGSASTRGRLRGRKPGRPSGKRGPRAIADPGPEFRDLQRSANERFIARDYHTALEYGQKAVQLNPEIFDAHNIVSEIYAAMGEELKSIESLIIGAPTKRDPELWHLIIERIKKLDTTDHPNYT…
>Alen_Al4_ctg01_-_Alen_Al4_ctg01g875t1	MMNHSATDPARDGENKKRSFDERLVNGVDARNDTAVMNGSTGKLATNGASAAVVAPTLDQYAELPPEIAHIGPEAYHPLSKLLARIAQECYNALEDTLHKMAGMSMGQQANGAMVNGVLPQENPEVNKRKKLLLLKFAQENRAKFIKLLVLTEWGQKSAVDIGKVIDLYSWAKEQAAHMDFVDEQVNQIKILSAYARENNPDIRTALEVLSTGKASWIPTLDYIPPDPISSDKALKLLRAMNTSLSIRLNVHETLPRHLRNWRIESGRATFVIDNEMEFDVISFVEDTSDQWWFIDLRLLFAPAPTIEIGSRFFLTLKQQADYVLHERGLAGLFDFLHNFVLTHKISVLRSQAAGLARSGWAGSLKVEPVHRELVVQYWTDRPGKKNWIEFGTTSNKPK…
>Alen_Al4_ctg01_-_Alen_Al4_ctg01g876t1	MTPRAELPPEHRRPRPQLERNASSHSKLSLPTSSQSNEADDEQSFSDGSFDMESPNVPPNYDGEDTRLTSDRELSGFYMYGWAAEVFVVCGIGSFIPVTLEQLARENGVLLHDHSTPCKASLPTVSPPTTSFTTLFRPHHPEKGQCVINILGFEVNTASFAMYTFSISVLIQALLIISMSGAADHGRFRKRFLLWFAFIGSIATMLFLPVVPSVYLLGAVLAIVANTCFGASFVLLNSFLPLLVRFHPTVRLAASNGEDSTDEYDDDVDNLSDEARLALEARYSNRLAPHESVLDEVADATTALLPPQRSAPDLTIPRTKDRSAPSQELALSTKISSYGIAIGYVAALLVQTLSILVVIAFRSSNFGLRLVLFMIGAWWFVFTIPSALWLRPRPGPPLH…
>Alen_Al4_ctg01_-_Alen_Al4_ctg01g877t1	MSLKDLAPIVSKTELIKFDDVVRIDVGQEGNQKTFVTNPNVLTTRSQFFKKALSGVWQESYDRVVKLPDDHPEVFALYIHYIHAGTLPVTPDTNSSVQEGHEENKALAQLYVLAEKLQDTMTKNTVIKAFLVIILMCREDGVARHKPKAEAIKIIYDGTPAGSMARKLFVDVYVYDIVVGWDPKDPSWPQEFLVEIAAEFLTHHEVYRKCNKTRGKYHHKAYLEEEVK
>Alen_Al4_ctg01_-_Alen_Al4_ctg01g878t1	MGLFSRKKPPAIINNYHNTYQQTTATAVVAAPIPAARPRLAACRNCYSAQRTQLLVTKWGANAGREYYICIGCPAEGSGGKSWIVWADQLVS
>Alen_Al4_ctg01_-_Alen_Al4_ctg01g879t1	MGTTAELKDESEDTCVICLSPVTERAITVPCNHYSFDFVCLVSWLQERSTCPLCKTEITAVQYDWRSPDNFKSYSIRRTHTPRDQPTTTDQRDSSLFAPYGLPSRRRCTRRPFSPPVDDPAIRKRCEVYRNRLYSLHVGSNPFSGYRDVTPQMIATDPELQSRARTWIRRELRVFSFLHTDPAGSASRAATTSSNAEFLLSYIISILKMVDAKASNGHAENLLTEFLGRESSRLFLHELYAWLRSPYTRLKDWDKEVQYFDRIG
>Alen_Al4_ctg01_-_Alen_Al4_ctg01g880t1	MLLATTKRFSTSPIRRSANSMLATSTRPAVAGPNGKPTYHTVTALKRWSCDDKDLPAVQDIKAIHVYDFDNTLFASPLPNKQLWNSATIGQLGNPDMFTNGGWWHDANILGATGEGADKEERRGWAGWWNEHIVTLVEQSMQQKDALNVLLTGRGESNFADLIKRIARSRKLDFDMVCLKPAIGPAGQKFRNTMEFKQELLKDIVYTYKEAEELRIYEDRVKHTKGFRDFFFQFNKDLMAGQMRGNRKPIVAEVIQVAENATQLDPVAEIAEIQKLMNAHNTQVKNGTAPQGTVPYQIKKTVFYTGYMIPTTMTEKLTSLVKLPHGTPDNDVRFLANSILITPKPCPKSILDKVGGIGAKVRWKVTGISCFENKLWAARVEPVPKTAKYYSENPTPTVV…
>Alen_Al4_ctg01_-_Alen_Al4_ctg01g881t1	MRFEYAVITAAMSSLAAGQTLNIPTRVGSIVSLASPSVISGSKDMGNKEYDRGHACDTDADTGSDSAVFILENGATLSNVIIDNNQLEGVHCKGACTLKNVWFRDVCEDAISALGNGNVLIEGGGAQEAKDKVVQHNGRGTVTIKNFTVVNAGKLYRGCGDCTNNGGPRNVVISGVKAKGVSELVGINSNYGDTANIQSSCGSGVKKVCQEYKGVNKGSGESSKVTTTANCKGQTSFSAC
>Alen_Al4_ctg01_-_Alen_Al4_ctg01g882t1	MNRGVNRVELNPCVQPAKAPWDLPLSHSDYDKLLKGYRPEMMEDKWLSLADDPDAQGNTIIRICRSWTRNEQFLLTVSIEDTKDEKGGNCAKIIEITWETQKGNTLIVDPGEEGEAEAKKRIVALCRGLMDCDMSDKV
>Alen_Al4_ctg01_-_Alen_Al4_ctg01g883t1	MSSTLSSLLFVTFLVALCQSAPAPVPAPAAGSKVLAGSVQHFTDASGCNTFIPIMQLGIGNPPQKVTVLLDTGSSDLVIPQTGSAVCQDKQQQCTQNAGVTSSPGNFSTGSFEPEKAVRVTDAGSPPLNATFQNGVQLQGSIVNAGLTVGNQSVDAVSMGLVTKGFLPPNEPLFPIFGVGPMQGEGIEVPYMNVPAAMKNIGATNANVFGLYLNDFRGSDGSIAFGGVDTAKFQGKFQAAPLLNSNDGSLPSFVVDFSSIKLVSGNDTADAGQDIDLAPQRGMSGAVTLIDSGNPTVLVATQSVMALSKALGTKFDTVTGKVGNVPCSMAQQGMSMSFGFNADQVKIQVPLELMMTPDPASGDCTLPIFATDDELTSLGSPFMQAAYIVFDMDQKQLLM…
>Alen_Al4_ctg01_-_Alen_Al4_ctg01g884t1	MRLLHNDDGSLNLIHLVLVGLLVLLAVRAVGLVFYRLFLHPLSKYPGPKLAAATQWYETYYSIIKSGQFPFEIQRMHKKYGPVVRVTPDEIHIDDPTFYEVLFKPTDMVDKLPFLTAAGALPGVVSFSTLGEFHRPRRQAVAPFFTRAKVLDNFASGKGAIGSVANRFSHRLSTEFAGKNIPVNIRHMLASIATDMIWEINFCQPSHFIEAPDFGHAFPMSFEGALGTTHWNSHFPWLMKILGLVPQSLIVWAWPTMRSNLEWRAAIKAQVDKILDPRNKDAFDNSPDRTLVHQLSDPKIPMARTAHYRRRYWPLGPWWS
>Alen_Al4_ctg01_-_Alen_Al4_ctg01g885t1	MTNLPEKTPTLANVGDTESAQDSNTDVGDARVQANEKNGETTSDDQYPTGMKLVLLSSAALVSIFLIALDQTIVGTAIPRITDEFKGLNDVSWYAAAYFMTYGAAQPSAGKLYKYFDIKWIFLVSMLIFEVGSLLCGVAPNSKTLIVGRAIAGLAGFFFFHLPAAAAPPKVRLTQKLLHSDPVGFALIMGSITCFILGLQYAGSTHPWNSSEVIGLLVGAFLIPAVLIAWEMWLGDYASMPPRLYKMRSLWAASAFQFFFLGAYIVLLYYLPVYFQSIKGTSPIQSGINNLPLVLAASVFTLVGGVVVMQTGYAMPVMVSGSIVTTVALGLIYSMDVGTSSAKWIGYQCFVGIFMAFSILHGLTVAQAGVGPEDLPAVTANLLFYQTIGGAFSTSAGQA…
>Alen_Al4_ctg01_-_Alen_Al4_ctg01g886t1	MFVALVEKQVSNSAPPSSPAVHGCIVPVQDIAKTSLSSVPPAGVFDRTTAETVTAKLLPPNHAGLFSADKTYLLLGLAGDLGISIAHWLFDNGARHVVLASRNPVVPQSVVDHAATVKGANLRFMAIDICSTESLAAAWAEIHASMPPVAGVMNGAMVMRDRLFADQPWADFSAVMAPKVTGTQNLVALLDREAKPEQLEFVVFFSSAVAVAGNAGQTAYGASNWFMQGTASQLRRRGTPACVVHIGHVSGLGYVHRHEKRKMIEDALHVLMAAVSETDLLDMLAEAIVGGRPRGGGPAEIITGIRGDIRAYSWREQPRLWHYLQSDEDSDEATDQDGGNLSLKTQLAAAVGDPDACLELLLKGFGAALCSMLHMKPDELEGNMPVASLGIDSLVAVRI…
>Alen_Al4_ctg01_-_Alen_Al4_ctg01g887t1	MSPRLVHFIRHAEGYHNLHSDESIPDPDLTSKGREQCEKLASVFPYFDRIDLVCASPIRRAIQTAQITMGPFLQSGKTKILALPLAQEATDKPANTPSSIERLKEEYGDVTDFRRCMDSRLDDYNTNTGKWAPDAKSLQARATELRSFLRELEEDEIVVVSHGDFLHYVSGDVDQDGEQLGGSWKNTELRSYRFWPVGHQDALMQETEESVTMRNAEGPGKQLGSGSSTSQFLQSNLV
>Alen_Al4_ctg01_-_Alen_Al4_ctg01g888t1	MYEDRPQFSGFMQPCRFEGDIQNLPFEGSIPAEIEGTFYRVMPDPHQIPFISDDPWFNGDGNISAFNIKDGRCHFKQKYVRTEKFIREAAAGRALVGKYRNKYTDAVAFRDFDGQLPSFTFTAHPRIDPISKELIGFGYEALGDGTPDVCYFTISPDGKFTQTVWMTAPVVAMIHDFAVTENWVLFPIIPQCCDVERMKQGGEHWEWNPNIPFYIGVLPRYGGTGADVKWFEAPNAFPGHTLNAFEDEQGNINFDLPLCDVNVMFWWPDSEGNAPAPETITSPLVRFTFDPRSDSLTLPEPRKLVELDNEFGKIDDRCSFKEHRHSFLLLKDFTLPTDWKRAGPRMGGGWPPYNGLGHFDEKEGKLVTYSPGPMHFIQEPVFVCRKGDNVPEGDGWVVA…
>Alen_Al4_ctg01_-_Alen_Al4_ctg01g889t1	MAPKLEYAFTLHVDLDHPQNFGKTAAGDRRFIPITGGRFEGPKIKGKILPGGGDWNAVRPDSVVHVLAKYTIQTDDGVLINVHNEGYGRASQQTMEGVFGDDPAKASQAEGGEKWYTKVFSRFEVADGKYTWLNNTCFVGDLLPPTVPNHVKVEVYEIL
>Alen_Al4_ctg01_-_Alen_Al4_ctg01g890t1	MSDTPESIVEHAYDHISQWYLQWVESQKSQREIYTEKLLEMLQPSPTVLELGCGPGIPILNLLLDRGAQVVGNDISTKQIEIARAYCPKAQLITGDMARLAFEPESFHGVISFYSLFHLPRSKLKAMLINIHRWLKPGGVFALNLATIDEEEIHGEFLGYGLFWSSYCVDENKRLLREIGFDLLQVQVLQAGDGNLKEDDPDFDAEFMWIMAQKKDPSTRQNVARVVERDD
>Alen_Al4_ctg01_-_Alen_Al4_ctg01g891t1	MTSHPPITLRQPLTSTPSPPQPSPPPLSWLTGSWNVTHSTLPMWKKSRNVRITYTALPTRTNGLVEIDDVVSYQGVNKSKKRVSTVRGVDKASSPPSSSPSAPAPATTEAQEVEREEKASPSYTWRGRGLLMIATSKWEILGWGDEAETGNQWVVTFFQKTLFTPAGVDVYARRGQLRGETVERIKGALEGLGGEVGTLAGAMFEVAFDGEREGEV
>Alen_Al4_ctg01_-_Alen_Al4_ctg01g892t1	MARGARKKSARPDQQGRNSAVRSSGHSQAQSSNIYANLDGRFAEDGEYNAHLTERFGNFVPRNVQVPDDNIPESVPARTNPDIRKYHEDATKPVAGAGAWIDKPEIPHPSEILQDESTITAGQLLIKTEDGPRPKKIEGPYDNIEDYLRTEYELLREDALRPLREAVAEVRKDAWKDEAQYDKGVGIYDPVYITSLVFSPRGLATRVAFSMSRVKKYVRWEQSKRLISGTLVALSPFGDAFQTTCILATVAARPMSALQLNPPEIDLFFPHYHQQIDPMQKWIMVECRASFFEASRHTLTALQHMMREPFPLSEHFVDVKKDVEPPEYIQNNPYVDLSSLVSMEEASNFRNVDVLEEWPPNNTTSLDVSQSRALKRMLTSKVAIVQGPPGTGKTFVSVK…
>Alen_Al4_ctg01_-_Alen_Al4_ctg01g893t1	MSTAGVEQLDLYSSRCARAVWGSMNEDDYDENGASSAEDEDEQEQEQEENDAMDVDEDEGGEDDDDGDNDDEDAEGDNDDDDEQDQDQDGDGDGDGDNDNDNDNDNDDEQDDERRSARNSGSPGPSDSNPRVTRTSPSPQAAATRALGSVPFRPRVRPEAITTPVYDIIPTIAAPHSTSINAITATPDMRWVFSGGADGYIRKFNWVDTANGKLALTVAQRHPFVDSVTKAGVLLSYWENEDSAPGADAPSPVYSLAVHHQSLWLLSGTEAGGINLQSVRHNEGHRIHTLRAHTSAVSVLTLAHDETSVLSGSWDKTIHDWDLNTGTVKRTFATIGTQISAIEQRPLSTLPVPRDTDALPPSTTTLSSNNAARPRPTALKDEPTNDDAPGSPDDSLFGD…
>Alen_Al4_ctg01_-_Alen_Al4_ctg01g894t1	MIPCTKPLIRNRSDCALDPTLALGLNSTWSFAQGWRGPGIKSGAKCVNCARVVPQAEDPLFNRRAWRHADQSRPKADQLKCYNCHYYFEINGRERPARLETSRAADSQEFKTKNRSGRTPPPICEHTGCSGPIYRWYPPHSKYYCPLHRDRAIKGTDMDAEPVVRAKKSKRDRDRPDTCEAEDRDETTIKYVGPSKQFYCRAHGHRARAGKKQRSSILPLMPSGIAQHTRDVQQMGKIWMLRLHTGNQGAVKDHSETQICRSSVDRIQLGLCGFLIGLM
>Alen_Al4_ctg01_-_Alen_Al4_ctg01g895t1	MLCPRSFLLLAWLQLAASQIDYAKYVNPFWGTEGSIPNYTFGGGAVFVGAAVPFGVVKLTMDTFVKNTSIAALQGGYTPNGLITGFSMMHESGTGGCSKYGVVSQMPLTTVEAPVNLLDNRTYWQGRVGRDQAGVGYFKTELENGVKTELSATRHAGFMQYEFPVEKEKHVLVDVSHYLPNVVGGYCTQTYREGEITISEDRKSYQGHGTYAGGFNEGAPYTVYFCGEFETAPTEAETFAGRNQFPGFNSMNPEPLPWPTFASENMTSPQGARVGAVFTWHGNTTTIRSKVGISFVSEEKACKFKNEEIKSWNLQTTVDAAVEEWNRDVFSKIQVDTGENANQEHLTLLYSSLYFMHLIPSDRTGENPLWESEEPYWDDFYCLWDTFRNTISLSHLIQT…
>Alen_Al4_ctg01_-_Alen_Al4_ctg01g896t1	MRRNSISALALLPLVSQVQAALDGDALAEQYFGNDAPWYRNRIPFFETSDKDITDVYYCRWNIFRAHQRDLGANGFISTEFLDDVGWQTKPWASLNDATGFHLLEGRWCRDRRFKEDYATFMFSSNSNTRQFSESMSASVYKGYLVDGVATDATARLDAMTSVFDAWQDAFDTSKGLYYVEPLRDATEYTISSIDATNGTDGFTGGNAFRPSINSYQYDNAVSISKLAQLKGGSDDTVTTYNQRAADIKSRVQNDLWNSTLEHFMDRFQVNNEFVKYWDFIRGRELVGFVPWTHDLPDDTPELAEAWKHALDTNEFAGPHGLRTVGPTYQYYMRQYRYVEENGTQPECQWNGAVWAFQTTQVLTGLANFLDHYPNGTATGTISKGDYTKILQQYAKLHY…
>Alen_Al4_ctg01_-_Alen_Al4_ctg01g897t1	MAPPVAPAAGATKADVRDQSALEQRLGQSTSVIMPLLELGAIGYVTWVLVYQICIQYLIDPSAEFRQDFNLQPRRATGIALIVVYAVLLLLLLVPWSRLLQVIWSKPDLTPLGDTSLEKKEVTTSWLGEYDVYICDHQGMPLWCDKCHNWKPDRTHHCKELGRCVRKMDHYCPWAGGIIAETTHKFFMQFVFFGALYTAYAWIVAAVFLGERIAKTGSRPGTWIGVIAVAVLFCIFTFTMSCMTGWNLCINYTSVEGIQRGGVHNIAFLIANPERSSLPSTPSGKDNPQDHDDWPILATIQRGARRTYVVMQTMPHEHPWYTSLMMGWKDVMGNNIIDWLTPIKHSPYTHKSNRGEFEWGELVYDMARQYEAQNPGVKLALLS
>Alen_Al4_ctg01_-_Alen_Al4_ctg01g898t1	MASQSSERPVGHMAAVCEYSSYSPFHHYSPYSVFPPVPRSLSYDYTSRIERHQRATALPNRALSEITLPELPTSSHPSPNCSHRSLEGDLFRFSLQCDMDPLKRDYALSATRPESNSSKREEYISWCHTKTKSQNHLQRSSPPLQPGEQNFPGKLPSFNEPIKFVQTTIERTPPHTPSRRNDSTENSPRVRPQFDDVAWSDSKRRRVDTLGDIYARPSNAAEYPPADPRRMSSAIDPALYHADPTRTRQQSAGPSLHRPSLPYPPPAPAATHARHQSQPVVQGPLSYQQPPMHAHRMVVQGPYAQPPPQPGMMYERRQSYYQDPHMQQHAYPYEDRRESVYYANPQFAVPPPAGYEQGYYDVRFQQHVGVDHNAFNRKRRGNLPKEATNLLKEWFHANR…
>Alen_Al4_ctg01_-_Alen_Al4_ctg01g899t1	MFDSERGLHDVQDGQELGLAGSTGVERRASSVERRAPSPTQREQRCCRSGSPTGSDNQRERMAIRDASPGDAKRTVRLGVGQGFVAFGHHQHQSPPAPVTTSTSHHQSPPVPVVSDRPASRKDQHVGKARPSIEQASPPAAPPAAPPAAPPSRQHRPTLSRRRESRCSRGLFSACMGDEGRNEQASQCNHALQGMALHVCFVAGKEQDTDRREACWPVINPSPFHRRQAPLTSRHNSESSAPGCWNVAVAQLYTLVSHQPGSSLRQLSAGHGAICWGYKGAISVAPTCTTCHYLGLTSVLVEGTVADSVLHVASAPAKPRKALHGRLPQSVPRSCLFSRHHGTVQPVPGTAGSRWERWPWSAQQQPAATAPGSVRLGPLGHTSTNCFCLHQGVSGLGLR…
>Alen_Al4_ctg01_-_Alen_Al4_ctg01g900t1	MSAAQVLREKQAPIKDGYRKDPSSAIVTLRSTGSLDDSSITCKLSTGAAIKEASRVAGLHPKAGGDDFSVSGELCSGDMLLDALVACSGVTLKAVATALGLPVKSGTVTAEGDLDFKGTMGVDRAAPVGITGIRLQFNIKFGEKEDGSEVNEDDLERLGKLTERYCVVLQTLVKKPSIGVVMVGSGKQEDGIEREIMHGSKY
>Alen_Al4_ctg01_-_Alen_Al4_ctg01g901t1	MNTFSTIAVLLATGLVPTTLALPRRSHFEPDKNYLTTRATSGTIALDSHVEYSSSMGVIGCLIKTNRIAYFPSVPPCNNPCIKLTAPNGNIITVLHIDQSGGSYDISMDAYKTLKYGAGWKTINTLPEAKWDGVKYEYVGMDQCKDILPKGTLPVIAKSPKKYVECAASEPQSFWATHTQFYDIDDTRCLRGVLQTCKMVPPNNTPTCANGKMAGMSGQMPLTGVDTVVDITAAGESVPAVRPAV
>Alen_Al4_ctg01_-_Alen_Al4_ctg01g902t1	MAEMSEQAFCAMCDKPSTQLCSGCKSIKYCSKSCQKLDWPIHKLICKTYKKFLTSRPDQEHHSMIYFAVNETQPRFIWARIDEGHNHPSREELKKHNMIIDLSDSGSSLGIKPLSVNVVLDRPLGPHLIMFHPPSAAQCCPCCKHTYKKNESLINVDTELADTLRGPILAWAMHHEDDMARKPRPFDLGPMDFRHMVDELRSYYSEVLEGYRELAFERTDSKGGVKGVRLNCKGDQQFLHRPHLEPTTTNESALLEQSLLLTPVADRLGMPLHVLKVAPAPVWRDRQLKPRMHNCCSGYLNPFISIQDDIGSLIITRKDGKELQPTVLQALFNLTSSKLGAEGTQPPFPADRLEVFTEQDVKLWAAKLASMETK
>Alen_Al4_ctg01_-_Alen_Al4_ctg01g903t1	MASHTDQQPQNGSHLPAIDEVSLQEMILEATDTLIPLDVFRRSPSPVDHNHLNNRLDAEQGYTREVLGRETESNEHEALLGERPSRICSVCRGRNSTEPVPTETDVAESGSSDFEDSAELRRPTLFGHRLHKPLKIVQATQQHITNRTRQSRFHGWRMGVLSGCCMSTLVLGCNIALVVVGANRYGGYDNSGIADLMYGDELTISRWNTALHIFINILSSILLAGSNYTMQVLSSPTRQEIDRAHGRGDWLEVGILSLRNLRRISRNRALLCLVLATSSIPLHLFYNASTFKIIAHNDYYVRALDIKSTAYLTMNSSTAYQNLSNEGWQSVYNRPFVSGHGNLYLVADWMAFNTTTNLDPLWLTPSMFLPWEARNVTKYNSLTVSALLNGSTGPDWIPY…
>Alen_Al4_ctg01_-_Alen_Al4_ctg01g904t1	MAGPKYQNVPQRDSFEEPSPSQAPPTYQAEDPQQALLRGVPRGEDDNLPDDFKFGGVVAEATLDIRMAFIRKVYAILTVQLLATAGVSALSMTSVTYRHWIQANQWMMWVSLIGTFVFLGLTFWKRKSYPMNLAFLAGFTAMEAYSVSVIVSMYESRIVLTALAFTVGIFIALSLFACQSKYDFTHWAPYLFGGIWILILFGFMAAFFPYNSKVELGYGIVSALIFSGYILVDTQLIMRHYHVEEEIAAAISLYLDVINLFLSILRILNSQNQQ
>Alen_Al4_ctg01_-_Alen_Al4_ctg01g905t1	MATKTALQNGSTTANGATKAQSQDQKMLVAPKRRKVAPKKAEDEGLMASLCTLICDHQIGISVNLISLLFLTHVFFPRARDRTTKFFHMSYYNPETNMYGCGTDDLPYVIFWTVAFTGLRVAVMDYMLDPLARLGGIRTKKGLDRFKEQAWLIVYYTISWSLGMYIMYHSDFWLNLHGIWEGWPFREVDGLFKWYYLVQWGFWIQQILVVNIEEKRKDYTQMLTHHVFTTALMFLSYGYYHMRVGTVILCIMDFVDIILPTAKLLKYMGYTNACDIAFGAFVLAWILTRHVLYMMVCWSIYAFAPVDMAPGCYYSNNAFVPMSNTTEFDRLGGNAPWSNLLKAYTDQNGPICWNPNLRYYFLALLLTLQVFCLIWFGTIAKVVYKVVKGNAPEDIRSDD…
>Alen_Al4_ctg01_-_Alen_Al4_ctg01g906t1	MNTRPIIDSDKGPFALSASFNADNSCFSVALESGFRVYSSKSGDQKVAREVGGGIGCAEMLGTTRYIALVGGGKQPKFPQNKVCPEDSSWHLLSHTDIVYEVQIWNDATQQVSTSLEFKTPIQRVRLSQTHLIVVLLNKVGIYKMKMPPEKVADYETVNNPFGLCELGKNIVAFPGRAVGQVKLFDLTTHNVSIIPAHESPLRALALSQDDSRVATASEQGTLIRLWSFPSCTKLSELRRGVDPAAIFSLAFSPSTTTLAVTSDKSTLHIFDIAQPSTQPPDPKDHKWKLLSKVPLLPRQFSDTYSNCSTKFEMGDEPASFGPAARSTTLNAGIPGVPGGRPTKGLLGWLDDQTLLIIGAGQDARWEKFNVGFDDTGKRAVVRDGWRRYLD
>Alen_Al4_ctg01_-_Alen_Al4_ctg01g907t1	MLRQMLKTRRKKNVKKGIQFCLMVCGASGTGRTTFVNTLCGKPVLEHKESDDPSTAHVEEGVKIQPVTVELDEEGTRISLTIVDTPGFGDQIDNEASFGEIVGYLERQYDDILAEESRIKRNPRFRDNRVHVLLYFITPTGHGLRELDIELMKRLSPRVNVIPVIGKADSLTPAELAESKKLVMEDIEHYRIPVYNFPYDIEEDDEDTVEENAELRGLMPFAIVGSEDVVEVNGRRVRARQYPWGIVEVDNPRHSDFLAVRSALLHSHLADLKEITHDFLYENYRTEKLSKSVEGGAEAGSSMNPEDLASQSVRLKEEQLRREEEKLREIEVKVQREINEKRQELLARESQLKEIEARMHREQSGHLQDNEPEEA
>Alen_Al4_ctg01_-_Alen_Al4_ctg01g908t1	MDRPQVSIPPAADVLGTLGTVYALPSPSPQDSVTNNAASSAAGVFRLFHSGVPFGVYAIVQNFSFSLQFQPQAFAGLTLISWGQTLYYHNKWKAWTATVATILLAMSFAVMEVILIFALQGPYDRGVKWPMMLMAISATLIQIAGLIPPYFELAKRSGRVIGIDFWFLLIDYAGAFFSLMALIAQQWFDALGGSLYIACMFLETGIFASQAIWLWRVRHIRREAKKAGKTYDEYVAEHPSKKLPSSQSSETVVDVEACNTPPVQDDFSEKSGTGAREQADTATESTHTQEKVPTSGQSFLQKWRALVLRPVPDAQS
>Alen_Al4_ctg01_-_Alen_Al4_ctg01g909t1	MTTPSDHPLPTPPFHPIPNIANLRDAALYPLPTPLGKLRTNLLFRSADVSSLTLSGWEAVHALGVAHVFDLRSKPEVERSPAGSVSDPEGSAAQKPEWIDAMDKAGVQRTWVPVFAEKDYSPEGLAGRYAKYMAESVEGFVQAYRDILASGGKAYRTIFLYLANLPVSGAEGSEETTARGALIHCTAGKDRTGVFFGILFDFLGVSREAIAEEYNLTELGLRHIREDVVARLLQSPGFKKYMLSLMTGEELSKEDLAKLIEKGDVQDEEELVISPEVREKGRQAALRMVGARKESMLATLEMVDREFGGSEKYMRTVCGLSDDDLDKLRTVLVVEK
>Alen_Al4_ctg01_-_Alen_Al4_ctg01g910t1	MRWFSSAQALAALSLLSSTSVVRPLVTAIDLDPTQPDSIKDASSKIAKELVAQYASKDNSGVHVLGGYPGVLYPPYYWWQAGAMFGTLLDYWRYTGDDQYNDMMREGMIHQFGENLDLMPQNQSKNEGNDDQVFWAYTMMSAAEYNFPAPPDDKPGWLAMVQSVFNQFVQRYTKEVEDGNCKGGMRWQIHPWLNGWTYKNTASNGGLFHLGARLAMFTKNDTYAEWAEKAYDWMNDSALLDDEGAVNDGMSMTTNPPCKEADKTPWTYNYGIMIGGAAYMYNYTNGATKWRNALERHLNKTEQFFPQYYRGIMTEVCEAKELCNTDQESFKAYFARWLGVCIQMAPWTHDLIMPRLQASAKAAAQTCVAPSQHGAGNYACGMRWWWDGHDGHQGVGQQM…
>Alen_Al4_ctg01_-_Alen_Al4_ctg01g911t1	MASKAPSREALTLLKHSIRPAIAIRSQAQSRLVPCAGAPLRSQTRAHPSRQTSRSTATFTHSHHAEAVSILPTVVDTNSTDFKENKREMEEVTEKLNNLHTKIAQGGPQKARDKHLQRGKMLVRDRITALIDPGTPFLELSQVAGHEVYPGEDTPAAGIVTGIGTVNGVQCMVVANDSTVKGGTYYPLTVKKHLRAQAIAQENRLPCIYLVDSGGANLPHQADVFPDVNHFGRIFYNQARMSGMGIPQISVVMGPCTAGGAYIPSMSDESIIVENQGHIFLAGPPLVKAATGEVVSAEDLGGGKLHSEVSGVTDYLAVDDAHALVLARRSIGNLNWHRNQTVSVKPSFKEPLYDPKELNGIVGTNLRKQIPIHEVIARIVDGSSFSEFKPLYGSTLVTG…
>Alen_Al4_ctg01_-_Alen_Al4_ctg01g912t1	MALRTISAKSAAALDQELMSTGAFSIDQLMELAGLSVSQALFKLQPLNKGKRVLVACGPGNNGGDGLVAARHLFHYGYQPTIYYPKQSKNELYQRLKKQLEDLKVPFTEDFTSALQQTDHVVDAIFGFSFSGEVREPFPKVIEALASTKVPVLAVDAPSSWDIEDGPREDGPGKGFMPPALISLTAPKPLVKWFKGRHFLGGRFLSPAMAEKFGLDILNYEGLDQVVEVPVESEKL
>Alen_Al4_ctg01_-_Alen_Al4_ctg01g913t1	MVLRIRLSRFGKKHAPFYNIVLTHARTARNSRPLEVLGTYNPIPQPPRPGDTHGRPWKDIKLDVSRARYWVGVGAQPSDTAWRLLSMVGILEPQYRISQIQGQVIKADSAAKSIIPETPVTPPAEAAVTQEQKVEA
>Alen_Al4_ctg01_-_Alen_Al4_ctg01g914t1	MPAYGSTGSPSLRKMESGYGNGYNGQRAASFSVGRIIGDPFALATISISILAWIIAFVASIISAIRGGFPNFAWWTLVFMFFCIVGVTVTVASDAERTYHVAIVGFLAAGLVFTTSSVNSLVYSPIAPFEAAAAGYILLSMIAIVWIFYYGSQPSAGHRTFVDSYALHKEQPGSRSSRPISNGYTNRPQTQISNSQQPQMYTSAQLNGFETSSPVSGYPGGPAGAQGRNSSAPQFGGANAQTPTQDEPAEQGIEYPYRAKAIYSYEANPDDANEISFQKHDILEVSDVSGRWWQAKKPNGETGIAPSNYLILL
>Alen_Al4_ctg01_-_Alen_Al4_ctg01g915t1	MTPTDTMDEYDEAVLFTYGLLESRLERLEYLLSGPKKQADEKPQTIPDRIHRIEQSLQQLAGKTALLDNVNELLTKHKDVLTPPPSTAEDTVPLSTSQKSLLVIERATSFATTASQLKALEDQQIPTTDGFVELAKLRPRIAEAEQRQLQQALKIAELRRRNGLLVQRDKQVHWVAAGTCWAKHQERLVKSYRALQREEFRRRPEKEGSDEGEKEGSDGGEKEGSGEGEKESSDQGEKEGSDGGQKGGSDESEEEVSEL
>Alen_Al4_ctg01_-_Alen_Al4_ctg01g916t1	MANYFAIASEPHDYDPMSASTGSLRGRRRGRGKKDVGHQGQASWISSVINLANTILGAGLLAMPSALSKMGIFLGIFVIAWAGFTAAFGLYLQTRCARYIDRGHVSFAALSQLTYPNASILFDAAIAIKCFGVAVSYLIIIGDLMPGVVVGFVPSAKDVTFLVDRQFWITAFMLIVIPLSFLRRLDSLKYTSIIALFSIAYLVILVVAHYIKGDTLASRGTVRVFEWAGPVSALAAFPVIVFAYTCHQNMFSILNEIANNSHFRTTTVICASIGGACALYILTGITGYLSYGDNIKGNIVSMYPTAAAATIGRFAIVILVMFSYPLQIHPCRASLDACAKWRPRRRSPSSREGSPTRHSLVGNEAAKPKVEMSDMRFAIVTTILIVLSFVTAMTVSSLS…
>Alen_Al4_ctg01_-_Alen_Al4_ctg01g917t1	MRFTFVSLSLLTIFPLSALCQSVQEDWTAPTLPDRTSSAQVGTSYTISWNLNLKSWFPTYCAACDVSKVDLWVTGFSSYEYTYKIASGVNVVATSSYRWNVDIDTPALLASPDWVFRFVPSGAAANNKQQISSAGFNITAPAEASRFASATSTRASTTSSAREPSSTSNSAEELAPSAATTSQPTTTPTTNPPPPAPPAPQSKAWIAGVTIAPILGIALGASLLWLLLQRRRKQRAEQHHQGSMGYGQENHATGISGNVSAVDKNTALVAQAAISPPVSELPHDSQPRYLQAGYQAELPAPLR
>Alen_Al4_ctg01_-_Alen_Al4_ctg01g918t1	MIALCVSSIAMFVKKWRYAFILATVGIFIIVVTTLSTRFASPIRSSTHSTLNYGGCSSATKTYPGVAACSESTVASAHACPTIPPSPALQPDTQGRFDWRAIPAHHPVDEFTRLPSDESETKRPIQHSFEAPSSDVKAETAKRQMAVKEVFKRGWQSYRDRAWTQDELAPISGSARTTFGGWGATLVDSLDTLWIMGMETEFAEAVDAALQIDFSPSGSGDVNMFEIIIRYLGGFIGAYDISGCHDPRLLRKALEVADMAYASFDTPNRMPVSRWNTVKAAAGEEQLPMESGLIAEHSSATLEFSRLSQLTGDMRYFDAISRVTDVLDSQQGKTKLPGMWPVVVNMQKPDLTESSGFTLGAMADSTYEYLSKMYQLIGGKGTVGAQYRKMYEYSMATAI…
>Alen_Al4_ctg01_-_Alen_Al4_ctg01g919t1	MFFRSIMAVSALLYSTATAQTACNNSPSLCSRAYNNITQLGAHDSPFLRNKNTSFSTSGNHYYDTTTQLDAGVRFFSAQVHKNDNGTGADEWHLCHSSCDLLDAGTLESWLSTIKTWMDRNQNDVVTVLIVNSDSATASDLGSQFNSSGISEYAYTPASTSIPTTWPTLDNLIGNGTRLMTFVASLSEASTQYPFLMDQYTYTFENSYENINPSNYSCTPSRPTGLTTSTAASSGRLFVMNHFLYETQLFGIQSPNETYANTTNAQTGYGSLGSSITNCTSVYGKAPWAVMVDFFNVGPAIASVDAANGVTGATGRRSLSTAALTQESEGGVAKTQGSLLAVVVAVVVAVTFGA
>Alen_Al4_ctg01_-_Alen_Al4_ctg01g920t1	MVAIREIRKYRGPELSEACGDFTTDLSRRSLQAPYHSVTIPYHQQSSLAMTENSETGQQCGKYDLVVEYIGARSKHNDFAARIRYLEDELEVVLGQVESLWEKRLDVEEKLDDPCLLDADQQKLLNECDRVDEGIKGFGNRRDQLLMEEKESNIQRRAWLEEVNTKIIVPYSKSWNLEFAKNMQRYLPRELRHVALTHLWTREKLINRHGMGTWGITRKEHRRTGSHARSSVRQIPHFLKKDYVGKATAYEAAEIMYGHVWSRDKHIKMYGMLHDVRFLCGDPFDVGHDASSTLRRLEITCEVDRYRVKNKCGLRSSCTHTASERAYTYQDKLRSEFAPLLNVVNKMGFQLEVVFIQRNVRLGVLIEVLETFADVYHAYQQAGARLKIDWKYAQCEHTI…
>Alen_Al4_ctg01_-_Alen_Al4_ctg01g921t1	MTANHGFQEKDLESTSASSHPSPAIEDYTAPTTEEEASLRKVAGGIPPIAYLICVVELAERASYYGAKGVFNNYMQFPLPKGGNGTGAVPKSNPNGHAGALNQGLQFASAMTILFTFLSYTIPIFGAWLADAKIGRFKGIVWGVLIGGVAHIIMIGGAAPALLKAGKGVAPFLISFILLAIGAGIFKPLVAPTLLDQYEHQKPYVKTLKSGERVIIDPETTIQRILLIFYGFINVGAFFAIATTYAEKYLGFWIAFLLPGIVYFLLPLLLFFMNRRLVKKPAVGSELVQFFKIIGAAIKGNKGKLWGKGYWDAARPSTLAAKGRTVSWTDKSVADVYRTLEACQIFLYFPLWYLNDGGIGAVQSNQGAAMTTEGVPNDLLSHFNPLTIIVFSPILSHGL…
>Alen_Al4_ctg01_-_Alen_Al4_ctg01g922t1	MPRLNENTERQLRELEYGARTGTLKACDSFSNFALRDNVLEIAVGLILASAFTACANSLVSDIVLPVISLLPFLSRNSDEKFAILRKGPHYNSTISTGYNTVNQALDDGAVVPAYGTFVEKILRFLLIAVSLWAIAMAYSRTSGDNIVKKQVKCKYCRKYISEKAKRCVNCTSWLDGREDR
>Alen_Al4_ctg01_-_Alen_Al4_ctg01g923t1	MPSYLQAPHRSFSFPPCIESVEVESSYDAGLPDIDEEPFAHFLTPLSEEDDPYDPMSLRAGIIGQDGPHTSKASKFKSNVSGKWARYVKQNHAQLHTRYHVPAIPEEDEESFMGLDDDRLNYTPQTVTHTSPRITITEPTRGRAQELIQRKERNRRQRSSRTLSGHRHSWREPSPELFTVDESEEDEVLVRRAKTRKAKDGAERRRSSTRSKSRARADVAERARL
>Alen_Al4_ctg01_-_Alen_Al4_ctg01g924t1	MAGKNRKRRKKKHSSPTANAEPTTSLLAFTVVTNGEIQEPNIDDSLKAAILKDGTSLFLELQQQKIKSLIRVNNANENLAAEIVKLIERTTNESEKSNPGNRKSRPWKRQWYGLT
>Alen_Al4_ctg01_-_Alen_Al4_ctg01g925t1	MSGLARLATLGLQLLDVQREEAPTRAPFVNGFSPRSFTSKLMPPALDRLLASPSALRLLRSIVTAPELPACHTTIHSCAAKSTAAKRRAYSKDHAVSVNRKWRRWNEQKALVSDRERVLKALLDDDVPAKVERTPTAEPTEQLDTWPNDTDEPAEDRDEAWAAKLAHHERTDGLRGIQALWNARRKAGYRLPVGNTANAQFLWGTFARHPKLVLYVIDHAVELQQETGETYPHLYSSIMGYWLLRKPTDALEYHHQMLVRLRLRELPLRELARSVRNYGHTAQEALLYIYRNSNERDLYDDIVPRLIDCGNIVMARRWHHLCTFRDDLPSSSFAAHPAVQIFTAESSTLSNPHVRFDKAKRENPKLNKDLMRRLLGRDTAPVRFEDSFTARMFATRTIQ…
>Alen_Al4_ctg01_-_Alen_Al4_ctg01g926t1	MAGWVFRENNVPAYQREFQKHDGLRTWEKARGKWMIPAYKVVLFGSLSASMYMMGRLVLGHKTWFGKN
>Alen_Al4_ctg01_-_Alen_Al4_ctg01g927t1	MADFVKSFFGAQKPVAAPADDGDFADYAGAPDPSPVDHASLTTSSVPAAATGIAGRPYTAWYRVWERTTADDFKLEMYILPFLFAIIVVHVWGTKRNRSKARNWAKSHVPVLQNEFVQVGYLQPAEGSTGVGNDDLAGALAEAAKLDKVLREKKADEYTTYATGRQNTAFVDFKLTLAKRFNPFLRFGEHILPLFFESFPPPQERLEATAYVFDGQETKIAPVYGKTDAKKVPNSTFDGFVFAVVHKDIMKRLRDDRYDLSLTTTRDHAKLPVWTTVMSESAEVTDTLLTPELIKAIHDAGDAFEALVVTDQPLDQPKTLDDTKPRKRINLSLKLQSDYTNTLPVFTQFLRLPDHLASAAHFRPEALRRIRQTREEQISKIRRLDEEEKAEERKLAADK…
>Alen_Al4_ctg01_-_Alen_Al4_ctg01g928t1	MRFTTSWALLPALLSSASARFVMYADEWHPTRPTNAQDRAGIDHVVLAFAYANNTAGYSPKVPISTIRSEFPNAKIMIAVGGWGDDTGFNTVSNSDTSVQQFASDVNTMLTNTGADGVDIDWEYPGGNGADYKQVSNSAKFYQIDAFPKLLAATRNAIGPNKLLSIAVPGKKRDMIGFTSQTGPKIWPSVDYINVMSYDLMNRRDNVTQHHTSITGSEDTIKNYLDIGAPASKINLGFAYYAKYFTTIGDCSASPLGCPIALAEDPITGKDLLTSGAWTFEKQHMAPVDASSLTVSYDGTCGPDKGTKCASGCCSQYGNCGTSPQHCSGACQHAFGTGCTDSDVAGSWQNAAKNGVTDQQAGGQYYFDPANHLFWTWDTPELISRKFDDIVRKYNLGGV…
>Alen_Al4_ctg01_-_Alen_Al4_ctg01g929t1	MDFEARVPIPFSVFPSAYRNAVNQETTSTKVEGEVKLPDQQAHGREGHEETHESFSATVHQHQHQHQHQEPQQQPPRDTHITEEVRIYEEERRRPQQHQHQQQPQAQPQPQHREEVHIHEETRYRQPERAQFDRQSQFESRQFESRQETRDRFPPQPSATHSHSHSHFDVNVKDRTYDRHFDTVHGPATDYAPTQIDVTERQFRERTRPIVEDSRVTRETFTAKHQDNVDQRYPEVRVESSARSTADAPKHRHLSMGYYDNEGQYHSFRHGISDAAHKVAHKVAERVAHPIHPHRHHHHHSDSYTGNKYSDDKEEIIVKEKYTTSAPSHVSAAPSHAPSRAPSHAPSHAPSHAHSHAPSRAPSHAAPSHVSAAPAPLPSRPVSSGAPVQRSVRASAPAP…
>Alen_Al4_ctg01_-_Alen_Al4_ctg01g930t1	MTKTIRLGFVSLAAKQHQTSTMPHSDHSPSPPASSLTNLPPFPDNVPTAPLLLISLTKLLNHDPEEQERCWRACQDLGFFYLDLRNDELGTALLADSDQLFQLMTAFYDLPVEEKVQYDFKSKGSYFGYKGFGEGIIDKNGTRDRNEFYNISKDDILGLADRLPSPACLSGHGERRVFERYIKSSHGICQLVVALLSSRLPLTENAGRDGGLTRFHRLTANSGDQIRFVKAAPQDRSTKGVALGEHTDFGSVTVLFNRLGGLQVRLPQHMEAVPPDETVQTASAVEKKLCEDGWCYVKPLPGHCVVNLGDALVKFSNGQLRSNIHRVVAPPGRQGEVTRYSLVYFCRPEDDVLLRSLVENGREEQEEAVTAKEWILRRALGRREAGGWEKSGGTEEGSM…
>Alen_Al4_ctg01_-_Alen_Al4_ctg01g931t1	MSAQQPHDEPEIDYHDEDNVLDADEAEEIVEDDGDVPMDSDDEGDDDVQMEINLQNDSIAHFDEHKDSIFCIAQHPVHPEIIATGGGDDVGYIIDITAVPEGQAAGEREGLKSVFKLEGHKDSINAVAFSEPKGQFVATAGLDGKLRVWQGVPDGNKWKFLAESSEVEEISWLAPNPSPAHPNVIALGANDGSVWVYQLSTEKGNELQVLHAFYLHTESCTAGAWTPDGSLLATTSEDSSLYVWDVFGDAASQGLIDPSAQTVVGLTGLDERFFIQGGLYSVAIPPTGAFVAVGGPEGQIRIVGLPRLSSEPASTSSGGSGAKGKAGGSKQAPAKGSSASAGQTGQILASLQAGSDNVETLSFSSAPLTLMAAGNVDGSITLFDTAHRFAVRRRIEDAH…
>Alen_Al4_ctg01_-_Alen_Al4_ctg01g932t1	MVFTAPTWLPQLASPPDSIPICDFMLEEHYGRHPLGYSNNPFTCGLTGKTYSSLEVRERVDYLARGLAKELGFHPNKGSEWDKVIAVFSVNTLDTLPLAWATHRLGGVQSPANAAYSAAELEYQLKNSGAKALFTCVPLLETAKEAAKKSGIPDNRIYILDLPAAFTGGKGAPNGMKTVDDFIREGKDLDRLDRLDWKVGDGAKKAAFLCYSSGTSGLPKGVMISHRNVIANTMQFSTFEKPYRDTIINDVRNQSDYIENCLGLLPMSHIYGLVVICHVSMYRGDGVIVLPKFEFASTLQAIQDYKINTLFLVPPIIIQMTKNKQLLSKYDLSSVWSLFTGAAPLGKETAEDMQAIFPSWKIRQGYGLTETCTVVTSTSPDDVWFGSSGSILPGIECKI…
>Alen_Al4_ctg01_-_Alen_Al4_ctg01g933t1	MDSQKRKRESMDSAIADMSSDDSLSSNPEIPVSDSSTQLTEVSSVEEPQSKRRKSNPTAVTFSLSSHDYGTAASQRPRRGAAPHVLPANRQPLILSKKTRPCKKRTADELNDKLSIEASQVFADEATAQMHTHGVNGNAEREQTPQQDQAPTGLPTPPQTVEKTNIQSTPQSSLRRSTRERRPTERLKLLDEEASPCSKRARAKPQREPSNRSEDTLPVEEHKSCIVRLRIPPALRSEETEQLMSFTSSFSHRQKKSDDNGTLESRELSQSFVENSSFQEFGSETFAQPRPEPILADSQDINSSQTQPDDENHHAAAHLQDPQGKSTLVRERFISTPDTSPQRLHYPHGVPLIVQNDTAINNESWQTQQTMPWYPPWNATSPGGTQQAPLTAEPSYHAS…
>Alen_Al4_ctg01_-_Alen_Al4_ctg01g934t1	MASKSTPGILYVTMQPKEGLPDAQFHDWYQNEHGPNRLRLPFCNNGFRYRATDIEKQQGSKEKPEWMAIYDFDELEWLTKEPYQKLRSAPVQTQRERDTMKQIFVDRRSYDLLGEWTGSDFKDLQKVENEGEKNVMIAVSFVLQDGEGKEEELKKWYEEEHVPLLQKVPGWRRTRRFETSYLDLQANSSLQKEFLALHEYAPQNGLGGPEFQKATTTEWCDKIYKDVVKDRKRRTYDLYYTFGAAQRDLASLSSPDAVQAESEYGLFKTYPSHVASSKRPVIESAITTPDGVNLPYRLEGSTDPSAPLLVLANSILVDYGIWDDFVTSFLELAPHYRILRYNTRGRTTLPKDTITPITIDTLTTDVITLLDALRVKTASIIGVSLGGATSLNAALTHPS…
>Alen_Al4_ctg01_-_Alen_Al4_ctg01g935t1	MTKHHLMCGTWVKPGVIITVSFDTETLKLELVKKTEIPHDEPISWMAFDHQRKNIYGASMKRWSSHRVDAPGEIVQTGSYPIGGHAKANDADTKTRAIFLLPSKKPPYAVYCNPFYDHAGYGNVFSVDDSGAMKENIQNYEYCEKTAIHGMVFDPTETYLYSADMWANRIWCHKKIDDQGRMETVGYTEATQPKDHPRWVEMHPSGQYLYALMEGGNRLCEYVVDPQTKLPVYTHKTYPLIPPGIPNPDTMYRSDVVFLNKSASYLFATSRSNSFDLTGYIAAFKIAPSGAIERQICLNPTPTSGGHSNAVSPCPWNDEWLALTDDEKGGIEIYRWQDEFLARVARLEIPEPGFGMNAIWYD
>Alen_Al4_ctg01_-_Alen_Al4_ctg01g936t1	MASAPEYQENSQHRFDPNFTDAVINAIGPKVDDRTRFVMGKLIRHLHDFIREVELTNEEWFDGVRFVNLIGKTTTSSRNEAHRISDILGVESLVDEIAHKHINESGDAPTSSTILGPFWSPHSPFRELGDSIITDPHPDGQKTLMHGVVRDLDTKKGIPNAVIDIWQASANGKYDFQDQENQKPNNLRGKFTTNENGEYWYYCYKPTAYSLPMDGAAGQLFKTLDRHPFRPAHIHLMVTAEGFKPLITQLYPRDDQWVQNDTVFAVKDDLLLDFTPSKDANAQLDLEYNVTLAPTGKKTGRLEGIPRLPNVFDEQSRL
>Alen_Al4_ctg01_-_Alen_Al4_ctg01g937t1	MGQGEIVSQMPTSLTVGDTQLAYIYFRSPPSINMSKISALTTFTRQTCSLPFQTYRAFTTSLAATMRVPYAPKEAPTEEARPVYERIAARRNPRPLIPLDLALLHNPSVADGWSSFIGAIRTKTSVPDTWKELAISRIAALNSAVHEWDVHAALAVKAGVSRDTMSVVFETPFVGRGNERQQSKNALDKLSKEERGVLEYTDQMTVGVQVEDGVAQALKEFLDDKQIVELTATVAAYNCVSRFLVALDVGECNGRGMKKVEDL
>Alen_Al4_ctg01_-_Alen_Al4_ctg01g938t1	MAALAPRLLTRTLRHAPRVAPLSTVRYASTKHPVNFTPPTQSDLDELRESVQDFARREIPEELAAKTDRDNAFPNDMWQKFGEAGFLGITASEEYGGLAMGYQAHCVVMEELSRASGSIGLSYAAHSQLCVNQLMLNGNEEQKKKYLPGLISGERIGGLAMSEHSAGSDVVSMKTTAKEVDGGYLLNGTKMWITNGPDAHTIVVYAKTTPDAASKGITAFIVDTDTKGFSVANKLDKFGMRGSNTGELVFEDVFVPKENMLGQLNRGVRVLMEGLDLERLVLSAGPLGLMQASLDNALPYTHQRKQFGQPIAHNQLVQGKLADMYTKYRASASFTYSVARAVDESHADPLIKTQDCAGAILYAAERASEVAADAVQLMGGMGYMNEVPVGRILRDAKLY…
>Alen_Al4_ctg01_-_Alen_Al4_ctg01g939t1	MSLRDKVIVITGAASGMGLETARLFASKGAKLSLADIQEQPLKALESELKETGAQVIATVVDVSQRQQVESWISATVEAFGKLDGCANLAGVIGKQSNVVPIENVDDDDWDFIYGVNVIGLRNCLRAQVPHMNAGGSIVNASSILGLIGAANNLAYASSKHAVIGMTRVAAKELGPRKIRCNCFCPGPVDTPMLRNSYEILGKEVDYSFLALGRTADQKEIPATVEFLISDASSFITGVALPVDGGWFC
>Alen_Al4_ctg01_-_Alen_Al4_ctg01g940t1	MSTENLIRITVHANRNTNISEEEYHKHWAEKHAPLVSAWLQRHGVVKYTQYHTTNAHKSLTSQNTLSYDGMADFYVRKYGDFEKAYEDPYYKDVVKPDEEYLFDVESMRVMVGTETCVIEDGEIVKGRGQNWYYLESKNIVSVFQLIILLPRLQPLLQNIMFDTWFSYKLAPDGDLEDGCHPEEAQALKDYLRQKTTTAEAAQAITRPTVTAENPREDFARLWGFLMDALMELPRQYIEALIALLRAIEDLPTPELTATASNEPVVELWRGLPGFGHLWSDMCRTGNWRNMVGVFSSPEHDALQDEYIRHAEIEARLVAADLAGIPLDWGYEAVADALESRTATLGFDIPAAAEWLVHCGERFRQGARNKEKSWGLVPHSRECVASIPLDLWKEPVDQE…
>Alen_Al4_ctg01_-_Alen_Al4_ctg01g941t1	MGLLDLPPEIIDYIIDFAGPAGLEGFVLSCKAVYERAKSQIHDHNTLRRRWDHTTNHSTMRRGDTLNILYEISQNPIIAEYIETLSLWDRRPNEEIQSQDATNSFRNNKEAMQQIKSLLRNAEYFQNAELDEWWTQIMEEDQTTDIESVDKLYATVALLALLPNLKTLQLPDRWHEVRDEEAAEALVPSVDSLVSMSNNNTHKRRWQALQSLETLMPFTEEGYDVRVGLQCLQPFMVLNSIRNLYAVSCVAVDDDWGGIPFHWRYASKSPLTRIEFASCCMDSQGLDALLSQTPAVTIFKYSHQTKWDGLGYDWNPGEFLQTLANHLGKQLVEIAITVDELHGEVVNGLSSFHSFPKLRKLEVDVIPFCGPPLESGQRLGRDAFIPDGATAWTHSDIPC…
>Alen_Al4_ctg01_-_Alen_Al4_ctg01g942t1	MSSHAENYGLPAAFTTIALFRASGQIGEHILHALITNKRKAFKVIAFVPPGSESDVPSSITTRTFDIKNLTQGQLVHDLKGVDAVVSALNGPALEAQAIIQDAAADAGVQRFYPSEYGFHHIYRKPNDPMGYIHPAWNMKAQANERAVIHPAVRSGKMSFTMIGCGDFYNQDREKVWCPWTQSPNSVEKYTIHVIGDPDAEADYTHLDDFANFLVATLLEPAKSHNQFLNIVSDTISHSDIAKLLEKYTGRKVEMDVLGEEKMHEVWDDPKKAPKEHTESAFPVDFWYLVKGNQGKGEFVRPKSQIHNDLFSDLTYTPFEGYFKTRFESAGKL
>Alen_Al4_ctg01_-_Alen_Al4_ctg01g943t1	MWSIVQYKQIGRDVKREWQRPSQRQPHGIHLRGSRQTNTTLRDNDLEQNISTEYVEKEQEELDNPSENEKIIVEFNGPNDLIHPHNWPLLKRARTMTILCMLVFTQAWAGACDSLANSKASKEYHVSPVAEDLSTAIYLFGIGSGCLFVGPFSQTLGRNPVYLGFKLVYLFFVLGTALSKNYASQIVCRYMAGLASSAALGINGASVGDMFRPVERALWFPIIAWVNVVPPVLAPIVGGWIASRDDLNWVWTDWITLTISGFAFLIAFFFLPETFAPMLLDYKAKHLRRISGSDRYVTEHEQGSGFFDQIKEVLPLSIKFSATEPAVLSLGGFLIVLYVLLFTFLSGFDYIFKSRYDLTSLEEGACFASIALGATAFSLTTPALYAYTRRHVGYDDRAG…
>Alen_Al4_ctg01_-_Alen_Al4_ctg01g944t1	MAEVLGLAASIIQLGGSGAKLSKELYVFISTAARADQDISAIARDVGTTSGVLANVGKVLETDDAIKIINQDAVEHAEDLIKQCKEVFEEILAVLEKRQKVSEDGKRRLSLMGKMYWPMKEQRVELLRRRLETLKSSLLVLFYVLQLAQNKGRGDVEKASLEEQRKHIREVHKQQQDSLRILKALEKRVCNIQLDDGMVPQGFDPSARMSVIEMRPIQPMAMVVTGSKDNYQVEVNNTAMSTFAANASDTSESDLVSTDEEGEQLTAEELAKCASNVQKLLQQITRLQSNVDNGNRRGILRKRRIHKLYRRFCHRFETDVVDRSAENLSQPARFDLNCRIAQNHAVSPQLSPTIPSGTITAAPLQTASLGFPPFKQPMNPILENWLKTNVYGFSQHPNV…
>Alen_Al4_ctg01_-_Alen_Al4_ctg01g945t1	MAEIIGLAASIVQLGGAGAELSIKLYNFVNSATRADRDMIDLAEDLDSTGSALNHIGRTLRAKDIQARTSPQAIKDATKLKRRCELVFVEIQDIIQKRQKIGKDGKESLTLAGKMGWPLKEQRVELLRRRLDSLKLSLSLLLDVLKLSQGEAQGKLQSELEKERETIRALYKQREKAFQRELALEDKLKNLQLEHAATSQISIVPPRAQIHGIVANNVALASSIPHPQIDANKVAMNRLSANDPNKSDGNTTTTDDEGENLTLEELEKCATHVQELLRRIADLQNGLKNGHIVKHHRKRRMHKSYQRFCRRFEANLVDMASPTSVGARPTSKDPLSFVPSQPPHREALVVTTEMDSSQDAGVAARERSMNLHSSSLLNNSQKVSSTALTASNTIIPPNL…
>Alen_Al4_ctg01_-_Alen_Al4_ctg01g946t1	MTALNQKVWFDCGLSERQDSLADGDGVNGHGMNGDYEFTASDVRTVNHVPITSKQRPWVNPKNSPLKDPGLARANIAATYDKPNGTTEGDWAKKHRHQTVLQQHCEFFDRDRDGILWPSDTFVGFHNLGFGVILSAFALFIIHINFSYPTSSSWLPDPFFRINLTNIDRTKHGSDSDTYDSQGRFRPQQFEDIFSKYADGADYLTIWTLLAQIKGQRNISDPIGWGGAVFEWMATYLMLWPEDGKMRKEDIRAIYDGSLFHKWARDCERKRRAGTMRRW
>Alen_Al4_ctg01_-_Alen_Al4_ctg01g947t1	MLGSVLFPSSLQSHSHSQSHSHSTKPSSSTRRNTVSGTGVPNLPPRRNSLGPSLSTTPAAQTAPLQLKSVTLSGGMDSRHYRSSSPRRAYNPARASTGTFADPYTSYDYSNYRPSSPRSSADRLSSASSSHHHPSTHSSSSYSTYVPTSSTSSRQNTLKYDSYGTRPRRNTEDRLNRPNVASLTSLPLRTPFSQDHRPSSPLTQSHSRTAHGDTYITHGSSRQDTGASHKKIYSVDSSHTAKLVAETDTLESPRLRDSGYGAVTSGRSSYHPSSSSKPSGRHAHADLGDNGYSYTDPASMYRDTEPAWRRPRAGSVERGSRPSSMIVDRPPRSSTRELGPPPSTRGFDKINNGVPRHAGRSSSIERRDRYQDPYSSDSGPHRSSSTRHAPAVHQEPPRE…
>Alen_Al4_ctg01_-_Alen_Al4_ctg01g948t1	MAKFDLSAVWSDIVAYRRAYLLTVVASFGGMLFGWDTGLIGGVLTMDAFQESFGLDDTSGDFANLQGNIVSVLQAGCFFGALTSFYVSDTFGRKWALIIADIIFIIGSLIQTLCALGTTSLAQLYVGRVIGGFGVGLISAVVPTYISENAPKEIRGRCVGCMQLFNVTGICLSFFVNYGIDLDITSRYNSAKWRVPFALQMLPGVFLLAGIVFQNESPRWLVEKNRITEAAKALAHVRGKSTEDPDVVQELDDIIADFNGHEKMPMIAQLKSACSSKKMFYRSSFAVILMFCQQWTGTNSINYYAPQIFKQIGLAGNSAGLFATGVYGIVKIVVTAIGLMAFTEQLGRKWSLLIGSAGQAFAMFYIGINQAVHPPTGTLDGNAIFAIICVYLFVVFYSF…
>Alen_Al4_ctg01_-_Alen_Al4_ctg01g949t1	MSERAALLIGALAHTKKEWEGVAQVASKLHEYPKGDRADFIKRCKEGEFDGVFALYRSNDSNPLTGDFNEELLDVLPKSLKFVCHNGAGYNNIDVAACSKRGIQVSSTPIAVNDATADVAIFLMLGALRNINQSFQAVRQGKWRGNFALGHDPKKKTLGILGMGGIGSAVATRAKAFGMKIQYHNRRQLSPNEENGATYVTFEELLKTSDVLSLNLALNPKTKHIIGKPEFDQMKDGVIIVNTARGALIDEAALVDALKSGKVWTAGLDVFEEEPKIHPGLLECENAVLLPHVGTATFETQRDMELLVLDNLTSAIKHEKLITQVPEQKDKANL
>Alen_Al4_ctg01_-_Alen_Al4_ctg01g950t1	MTRNMELKNIAILGPGGNVGSAIIDKLLQDGPRFSITAITRPTSTYTPSKSSGITHKTTDYTSLSSLIEVFTGQDAIVNCITGGATQYEQSKLIIDAAVAAGVKFFFANEFVGYVTSPQFRRMPEAFAGAKIRIREYLGELAAAGSITWTSLNGGPFFDMWLMKGPAGFDVANRQARIYGTGNNPLYWTPLRTIARAAGNMLRSPDAVADRPIYICPFGKGELTQNKLLAALQIALDNSFTVETIDVERINKHSKIALERGEAGKAMKGFTISNQFYEADSGNDFSHLIENDLVGVEMTSVEVAVQDALTKWGKDCPVVEGMFKVEACEI
>Alen_Al4_ctg01_-_Alen_Al4_ctg01g951t1	MIALIALLSTCSYTQKVADVPIVVAPSGKWSGPDGPWSTFNLGVGNPFQAFEGVPGTSSSLALLPTAAESCDEAVCPGRNVFYSENSSSWKTAGVYSLPVPYYYTENLFKGINGTRGAVWGQDVMYLGNSERDIPSEIYIAEIRSADFVVASFGLAAGKVGGSTITHPTLLTSLRQKGDIPSASFSYTAGSARRNSSGSLVLGGYDASRFDSSTTVSLQMPALHNNSLVVVVDSITLSGTLQGTWKPEGTTGASFNVDSTLPQLWLPLEACIVFEKTFGIVWNDTAQLYLLDDIVHNQLQQSSPVVNITIRESDQRIVTFALPYTAFDLTATVPLVSEGSSATFV
>Alen_Al4_ctg01_-_Alen_Al4_ctg01g952t1	MLSMAKCSLLSWTVALSATSALAHPLFNGHLVSRADELLSEYDYVIVGGGASGLTVANRLSEQSSTTVLVIEAGELDQNEDFVTIPGLAGGAIGTKYDWNTTYAASEYLGGRNVSIAQGKVVGGSTKLNRMVFDRGAKSDYDGWEALGNEGWNWKSLLPYFKKNEIFSPPTPEIQKEYNITVDKSAHGYKGLMHSTYSPYFWPTTKNLVAATKSLNIPISEDQAGGNAIGGYYCPHNMDPTEYKRSSAREAYYESAVKRQNFHLITGQQATRVLTSGANSTLKASGVEFAASANATLQTINAKREVILAAGTLHTPQILQLSGIGDPALLSEINVPTVVDLPAVGQNLHDHVFLAVVNTVNTTLDIGNDLTSNATFAAAARAEYDDKRRGPYSSPTGDF…
>Alen_Al4_ctg01_-_Alen_Al4_ctg01g953t1	MAEQLKVEIKRNARTRRARIRIQSISRDLEDSLTQDIDAGCDFDAQSDLHTATEYPGGQTLRASETACLAPALTPPDSIGLANSPNSSSACRNQGVTAATHADHAAQQSHSAQKDFEPSLLMSYLDYAFPVLFPFYKPSVLEGGRSWLLTLALQHPAFYHNIIGLAAYFYGAVPVAPGPEHDACVVKAQTELQTQMEKAVQGVRNSLRDVNERGIQNALSDSIHLLGNIVQLVNFEIAFASSENWQIHLTAAANLFNQTLRHHGKGGQGVLLITSLLEKLRCNVPLNCSVWSAEQAAFRFFTAMVIYQDIIASTTLEKAPTLFSLYSNVIADTPMLDTPSLLNLEEFVGCQTWVLVSIAEISCLNEWKKGSTRQGNFDIMVQVRNATIIQERLSDGVAR…
>Alen_Al4_ctg01_-_Alen_Al4_ctg01g954t1	MSTPKILVLGGTGPAGICLLRELLYRNHSVVAYARNPSKIPADLSSNPLCSVVKGEMNDLKTFSTAIAGCSTVISHLGAQISDTHIAPSLYADMYRNTVIPSMRDHGVKRIFLMGTMAIQKPDDSWTLLTPVVLTFMKLFARAVYRNILNVADLFENEAQDLDWTIFRIAAIPGESDEGSWRKGRDEGKLYVGPLGAKGWTMNTNRSLLARWLSDATESGASEWVRKMPAVTRLAGS
>Alen_Al4_ctg01_-_Alen_Al4_ctg01g955t1	MHLLLLTFPTIAVAAIPPIRPPRIDPPEPLVVPKPISPNLNPARPYNGEDISPAQQTAVASNMQLLEERLEAIQDGVDIGTGLVQAIFSTSTESLNWQNIATKTSKPTQSASATRTVNMSLFGACKSYASTLSSCASATTSFFDLDTMQQASCACYTLSAMASGSCASVPTLVTASVYAETCQSFFSVNGFSEIASAMSDSGNVAGVGFCGALDAVLSVRNLVANATGATELSRTLQPTACTVSRTAVATPTAKKSTGGALSLRDQVHGGLLTIVFASLTAVLGLVALAGTRIPISTQPTLRTLKPSARRRLKKERAPSLWILPDGINFSMKDEPTYPKTSLLGLPTELRQGILLLSYDVEVMAVQELASDRPWKRQGKSKGRASVFGLPEPSKQSSKG…
>Alen_Al4_ctg01_-_Alen_Al4_ctg01g956t1	MSRANQWFVLGDGIAREVITADIQRYLGPDALVRPGTGTGEYQGQPGYWITAYRTLTSQMIQDLKMDSQRWQQERQPGEGRGGSHSPYLRDTKVSRGPDAVLAYQDSRTHAARQHWGPSKPVEHPSAADPYDRQPAPRASSGYSTSSAYAPSEGHYTTAPAGYGSSQPGYQAAPSQAAPRTQPADPYSGYSQRDPGYQSQAYGSYPSQSPTDAYSRSTAAPTAYATPRYFGYTDENFLVYR
>Alen_Al4_ctg01_-_Alen_Al4_ctg01g957t1	MVAFSRFCAALTLLGHGVTASRVLSKRNDTERYATNLLHESMNWLDMYYDSERGYLFSLDSAALVHETRASAWYAAGLLARNEVDDAEQAVRIVTNIIGGQFMNESLQWFGDYQIYPEEPTVGTEQYEPKIYNSWDPNWRGFVGTTFVLMLEEFPHLIPQDTQEYMIESLFNTTVGDSYRVGGVDDDNLYPAYSNPSIMRAFVSGWVGRRVNDSNMTTAGEAYAQDVVDLFKRDNTLSEFNSGTYAGVSLFALTLWAKYLPQDSVMGQYGSEMIKHTWNSLGELYNANLKNVAGPWDRSYGYDMNRYLSILALQMWTLVGKDDAPINAKPYAMGHKNDFAIAPLIAILTPFHNTLVSNTTLSTLTTFPGTHAVNTSAFSPPFDTYPRNITAWMSANLTI…
>Alen_Al4_ctg01_-_Alen_Al4_ctg01g958t1	MSSPAPFLASSPLSITSPRRIPKSKFTYKQLHQLRSYSTQTPLRVIAHVDLDAFYAQCETVRLGIDPEKPLAVQQWQGLIAINYPARAFGLNRHVTSTEALKQCPGLIMQHVATWKEGDEKWAYHEDSFTNMATHKVSLDPYRLESRRILKCIKEALPEKEQRVEKASIDEVFMDLSAQVHSLLLERYPELRGPAPYDDPTEPLPKVPTTVLDWAADALVETGEEDGEDKDPDWDDVCMVIASEIVRDVRKHIKDTLHYTCSGGVARNKMLAKLGSGYKKPNQQTVIRNRAVKHFLSDMKFTKIRMLGGKLGDEVVAMFGTDKVKELVEQPLDQLKKLGDDTGSWLYSIIRGEDISEVNTRTQIKSMLSAKSFRPSINSFEQGVRWIRIFAADIFSRCV…
>Alen_Al4_ctg01_-_Alen_Al4_ctg01g959t1	MSFLSALLKPKVLVPLTGNVLAIGSATYYLQSKLNYNLEEQEARLDEIEGTLRGHIGLIEDALDRIEKKPNQNHQEKLYSERARDEKKGKEHK
>Alen_Al4_ctg01_-_Alen_Al4_ctg01g960t1	MIAFTVAILTIVFVNEVNLEYCPHPELCPYLDNSGPSNSSEYYVDVSVGRLAFVSSLSSTISFALVASLMTLYGYVVAKQMLRASIQCNKKATLPSPYYMSTLIRILNAEIVPLWDTLSRFCQQPHRSYKGHSFGKQFTTPRVFRLCRAVFVLSLFSSLCIQIADTYLHVVIDATSVTRLLPELNVEHQLSKALAPWYFQDDGSYGTNHSKLFWSNALQFIAEDTLRSANTSLFTQTIHKIDSLVFNYTDAQGFASRTNTPSLFGKIDLNTSFPLNLTSQDSDAIFSNPWRWLGKTEIQSDKSDLTAPFLNSTQLLWAARFGPVFLLTCNTTVFDVSYSVINNQVSSLTTSKSNGSVAGMVSMHSLNSLSGMDVGRNQVVFEINENRTTPDAFIRNFEL…
>Alen_Al4_ctg01_-_Alen_Al4_ctg01g961t1	MASNQNPWQDEYSSTAPTSGGGYQSPPPPQAHGVSNHNPYSAYQDQTSHNQYTPPDHPPPGHNLGQGQSEHQSSTHNEQDPWAQYQSPDFNPNPQQPPSNPSHQFRVPPHNTETQNFQGLNDNNYEVPPGLPPRRTGTDLALPQGQDRSHQIEVMQSYEARGMKDEHDQNVEILQREFPKLDGSLIAAIYGDSQSLSATREMLGELDRE
>Alen_Al4_ctg01_-_Alen_Al4_ctg01g962t1	MAPSQSLVNKLKVQLKLSISRLRMVQQKDTAKAKQQRREMAQLLEIGKLQSARIRVENIIRSDITTELHEILELYCELLLARSQLLDQPTPSHSSTPIPLDSALEEAVRSIIYAAPRTEIKELHQVRAYLVEKFGKEVAVAAMDGEGVAERVAKKLEAKTPSEELVDAYLSEIARFYGVPFGAPKSSDNDDDDEPSGGMGEEADTEVPLATDGKKDNEREELVKATPPRTVGPQSPLRVVPPSPSTDNVAPRLKLPGAAATKVQKAAEKNQPVKKDSGPGGKIPDVDELSRRFAELKR
>Alen_Al4_ctg01_-_Alen_Al4_ctg01g963t1	MASRPEMREDDESGFCKFFRNLPLKNDDTIRIFDRGDYYSAHGEDAKFIANSVYRTTAVLRKLGREPGLESVTMTTMVFRNFLRDALFRLSKRIEIWQSTGKRMDWEVVKQASPGNLQDLEDELGGHIENSPIILAVKVSAKASEARNIGVCFADASVRELGVTEFLDNDLYSNFESLLIQLGVKECLIQADGNKKDVELNKLRTIADNCGCAVAERGATDFGTKDIEQDLPRLLKDEAAAGTLPQTDLKLAMGAAACLIKYLGVMSDSSNFGQYQLYQHDLTQYMKLDAAALKALNLMPGPRDGAKNMSLYGLLNHCKTPTGSRLLSQWLKQPLMNLAEIERRQQLVEAFVNDTELRQTMQEEHLRSIPDLYRLAKKFQRKAANLEDVVRAYQVIIRL…
>Alen_Al4_ctg01_-_Alen_Al4_ctg01g964t1	MMKTDIWLLAALYFGGAVDAAISSNYTDAILSSGTIKLGDWQDAFDKASEFVASLSTADKLSIVTGSGAGNFTGTQALDSSANPINYYFVTAWPAGLAMSMTWDKDAINGQGKALGAEFKGKGLNLAFAPTVQPLGRSPWGGRSGESYGPDSYLSGIMSGEFVKGMTASGVTPSAKHYVLNEQETNRQGSTSGGGMGGGMGGGPGENSTDGGPPSMRRRQDAGNSTSSSSSEAYSVEVGDKAFHETYLAPFYDSVKAGVGGTMCSMQKINGSYGCENQDTLARYLKVELGFPGYVHPDAGAQHTSFDSANAGLDSGSSTYWSNSTLVAGIANGTFSSARLDDMVIRQMMGYYKHNQEVYPDHAGYTDNVDVRGKHGDLARQYAAESIALLKNTNNALPL…
>Alen_Al4_ctg01_-_Alen_Al4_ctg01g965t1	MKYAFGAALILQSTVALGELLPVHLKAPTTAHFRDIVRNDTYDFGCRPVAHPTDDGHFTLHALLTEDQISHLTKEYESVDEITIHRQMVKRAATAPIGTGDRFKAGTVSPVGLGTQASGTTISSIMNVAEVNSAFNALVKNYGVGSVTLPYKTFNGATSVAGFVGAGTDKSAYRLYLSAGVHARERGGPDQLLYWISDLLAANKAGTGLTYGKKTYTNSQVKSVLAAGIVFFPLVNPDGVTYDQSSGSLWRKNRNTKSGSSGSSIGVDINRNFDFLWNFRKYFDSSEAPASTSPSSETFYGTAAASEAETKNHVSIYDSFPKIRWFMDIHSAAGDILYSWGDDDDQTTTSTMNFLNTAYDGKRGVTGDNVYKEYIPAADFTNIKNVAAKTVAAMKAVGG…
>Alen_Al4_ctg01_-_Alen_Al4_ctg01g966t1	MPPTFENPIIRGFNPDPTVCVVPSPTPGGTPTYYLSTSTFEYFPGCAIYRSTDVINWKLIGHALTRPSQLNLRTVEPGAGSWASTLRYRPNEKRWYLFNGVYHRYRPSSDERIFPRGFYVWTDDIDRDGSWSDPVYFDNPGFDQDVFWDDDGKTYLSTTVRIADRDPASKLKDFAIHISEVDLPTGRTLTPPVCIRQSKYGVAEGSHIMKKGAYYYLFVAEGGTEAGHQEWVFRSEKGVFGPWESQGKPLWYNGSDEKIQRTGHADVFEDEKGRWWGVFLGVRPVAKEGEFLEPQLGRETFLVKVEWVDGWPVFNDGKNIKFQTDGRDEVAQLVTQLKPEGVRWQATLESITDALELGWYQKNTPLKPCHSFTERPGYLRIHGGCYDLSSPEAPALLLR…
>Alen_Al4_ctg01_-_Alen_Al4_ctg01g967t1	MPTDLTKIRADAAATYNSISNLHTHNADQTAAATKLIELFLLAFKYYDFDEVRKLSAKDYKKHDQTVEGGPESITDFAKRVRAEEIKDGCGLDEPGELGMEYKRIFVDGEYVIPHMHITTRSGQPDLQAIEPMLYKDGLSHEHWTCLQPMPD
>Alen_Al4_ctg01_-_Alen_Al4_ctg01g968t1	MSSTPTSDPEKKTDVFDEDDAVLAQLGYTQELKRSFGLVGMVGFSFSIVTSWTALSGVLIIGVETGGPPVMIWGWLAVCVFTLSVAYSMAEMCSAYPLAGGQYSWVAILAPTSWARGFSYICGWFMLIGVLAMGATNNFIATNFVLGTAQLNYGFTIERWHTVLVAYLVTVIAMVSNIFLPHILNKLSKAILAWNMLSFVVCLVTILATNDHKQSPEFVFSDFQNFTGWTPPYAVVLGLLQSAYGMCCYDAPAHMTEEIKNARKQAPRAIVLAVYMGFITGFIWLIALSFCIGDLDTTATTATGVPVIEIIFNSTGSVAGASALSSMISVICLVASNSLMAEGSRSVYAFARDQGLPFSDLLSKVSSRSVPVYAVLLTGIVQIAFNSIYFGTVTGFNTI…
>Alen_Al4_ctg01_-_Alen_Al4_ctg01g969t1	MPPSRIPSSTPYAWPHTPTLSPHTTALLIIDMQHDFLSPSGYLSTLSPTTNLRFTPLIPIIARLLTTFRAAGFPVLHTREGHEPHLATVSSRERHRSAVSGAQIGSQGPMGRFLVRGEVGHDIVGELAPVEGEVVIDKPGRGAFANTELEAVLKAKGVQNLVVCGVTADACVSTTVREASDRGYDVLVVEDGVESVNDELKKWSLESVKVEGGLFGVTAKSNAVIEAVEGWIGDSPKEKQSSRER
>Alen_Al4_ctg01_-_Alen_Al4_ctg01g970t1	MTGRGKGGKGLGKGGAKRHRKILRDNIQGITKPAIRRLARRGGVKRISAMIYEETRGVLKTFLESVIRDAVTYTEHAKRKTVTSLDVVYALKRQGRTLYGFGG
>Alen_Al4_ctg01_-_Alen_Al4_ctg01g971t1	MSPSKLGLFASLALAARAVLIPPSMTAAELGDDNALETLGINPFKRTLAVECPGCAVATLDGEALAWDKGAGNAFLLDFEVSPREDALEIDGVQLYPPTFAIASQPFYVTQINPKSEDALRLRVTGYTFHFNTAETISEAGVELLPMTFQITSIESVPMDPPSVTVNLLKDPTGRLMIASFDAKKAVEATPVEQEKECKQLPLLCKMRAAMADRLEKLKHMGKGRPGCHKRPHGMHRPDGHHNPMAEETFEGKPPHKFRPGTHPHPPHHMEHNGHHHHHHGHHHRMHMFLRRAFFTILVPILIGIFAGTLTYLIGMALGCLIAISIAKFRGQSYQPIALEDDVEEAKVEVRSEKQEYAELPAYEAPPVYQDAPEKEVVEETK
>Alen_Al4_ctg01_-_Alen_Al4_ctg01g972t1	MPTGFEKINAPCLQALADHLPYLWVDTCCIDKTSSAELSEAINSMFRWWWYRPARVCYVYLEDFEVSSVPGVTADAAIGSEKAGLGKARYFTRRWTLQELVAPRCMDFYHKNWVCFGTKGSLKSALAHVIGINKAYLSDANTQTSPYLLLDVTVDKGISVFAQHPNQFLAAVDTSSYTSEGESSTISGKGLKIQLPLFKKFKYPSSQPSIAVLNYAAFRGLRMF
>Alen_Al4_ctg01_-_Alen_Al4_ctg01g973t1	MIRLINTKTRKLCQFEDDAEIPKYAILSHTWGDAEVSFREFGSLSSKNDSSRQARIKSKAGYLKIERACREATRDKIDWVWVDTCCIDQGSSTELSEAINSFFKRYREAHVCFAYLDDVLARKSDTETDMSRMNKKGLGEARWFTRGWTLQELIAPRKVEFFDMDWKFLGTRRSLRKVLATITKINESVLAGKAMDQICIARRMRWAAGRQTKREEDVAYSLLGIFGVTMSIIYGEGKKSAFRRLQRQIVDANGDQTLFAWQPRGALKMSDRTPPVRMDDNEGLDLFASDPAEFVFNKADQIVPTARRGPAPSTITLGTDVGVTVEKMASQRGFFIGILACSLKDKPNDCLVVVLQRRQNGYVRHHKAALLSYELAQKSRSVDPGQAKNVPS
>Alen_Al4_ctg01_-_Alen_Al4_ctg01g974t1	MAPKVVNCTEQARLEKHVQVPRHQYLVKYLDNTLHKNLHNTLDKTVQASPSGSPPRGWHRLQRALLLVQVVEVRGACGGAGAPAIGRAGSGAMLTVDSRVSAYVMVIAVKRDMRATVPNGAVDLGSLQTTHRSPVTAPGALAA
>Alen_Al4_ctg01_-_Alen_Al4_ctg01g975t1	MSRRYPTAELYEERERDFYRNGNRSDRNYEELDIELRRGSDPRRSAPDFFRDDRPTAGPMVLRGRERDDDSFSRAPPPPRSHRGGFDDDNISIRSRPPPPPSTVREREIDDITLRRSDTGGRGRRDVEREKDEIDVTIRRREQSRGPPPREAHFERDIPFRRGDGAHPRPREVSLERDDVRFRGRGDNIDIRASRKEFSSDGRDASAERGSIRFQERDGNFDLRASHREFSRNGRDRSVERDSLVIRNRERSLPPPSSRGELVAREREEFVVRRPREQSRGPREREVVKDEIVIRRMEERSPSPEPLPPPPPPPPAPEPEIRPPIIQEIITHHRHIDHGVERARSPTPPPPPPAPPSPPRNERIEIEINRRETRKGGRSTEFEELDIEIDRSRSRNHDF…
>Alen_Al4_ctg01_-_Alen_Al4_ctg01g976t1	MFALKSTSLALVVGGGLWGMTVAQKLGEEMVVPVAATFYLQETETQFSVNIANDSSDVYFYFASPAYSWVGVGFGRQMEDSLMLILYPSADGDDVTISPRIGRKAGEPVFTEKLEIEVLDGTRVEEDMMILHGRCSDCRVWPNGFLDATSSDQPMIYAFGDAHALQSSSPSADLQRHVRYGHFTMDMTAATGTGGVPLKSNASSGVQAQRDMTRDIDQKNLAHAILGCLVLFVVWPLNVLVAGFLKNIHIHIGLSIAVVLCLGIVYGLGISTSNQYNRSKSFNTPHQILALASLAPLLLLTLLPVRRLSTLHAFIPRLHAPLATLTLPLLLISGGLGLQLSTQSRTLVLLYTALSLLLIIFLAILTSIVRRRGSAYKRAGTRLPLAELSGSEVGLLGKE…
>Alen_Al4_ctg01_-_Alen_Al4_ctg01g977t1	MLTFKKALVLSLACLTLFFMFKSHHTSNKSPTFKNAHDLPKPSPWVNPKEAAAKAEAAKKQADKTDKVFNTPEPPVKKPKEQLSLDELKMRPLKQQLEYQFPYDVDAKFPAYIWQTWKYTPAQGEFSESFREAEASWSVHHPNFVHEVITDNVAVHLIRHLYASVPDVLEAYSALPLPVLKADFFRYLILLARGGIYSDIDTSALKSAADWVPSDVPTNTYGMVIGIEADPDRPDWADWYLRRIQFCQWTMQSKPGHPILVEIVANITHETLKRKAEGKLSKDHKGIIEFTGPARWTDSIFGFFNDPDYFDMSSSKGNITWEHFTGMKAPKKVGDVIVLPITSFSPGIKTMGAGEDDDPMAFVKHAFEGTWKPESERHIGEIFN
>Alen_Al4_ctg01_-_Alen_Al4_ctg01g978t1	MSSYGSAHSGHLHPGFQPPPQQRARSQSNPPYPTTPASASYPQQQQSSYFPQPPTSNPVAIPTSNNRRSLDNGHGYGSSPSYPLPSSPYSNSYPVQHLPPIPQQQPIPENYQYSTQPHQAVMSGEPVHHHRRRSSSSAYGYDARQSYESARSYQSSHSPRDYPSRQSQISYGNYEDRYNYSNPNEGHVPVYPDPVPVKEYGDWDKEEVSKYHKNKDLERRPTLGGSLMSLVRKGGKKLNGERR
>Alen_Al4_ctg01_-_Alen_Al4_ctg01g979t1	MAYNQPPGGYGQPPYQGQPYGQQPQYQQGPPQGYGQPPMQNQQYPPQAQYGAPPPQQQWGQPPPGQYGAPPPNQYGAPPQGQYGAPPPQQQQWGQPPPPQGQYGAPPPGQYGAPPPGQYGAPPPGQYGAPPPQGQYGAPPPQGQYGAPPQQQQYGAPPPGQYQPPPQQQQYGPPNQPSLGYGPQQTANIDVSRDVEAIRKAMKGFGTDEKALIAILSKKDPIQINTIRTQYDQRLMRNMVNDLEKETSSYFKEGLVEIARGPLVSDCHNLFNAMKGMGTKEAILDDILINRSNADINAIKQQYQVLFKKSLETDLRGDLSAGTEQMYMMISAARRAEDSHPVIPQEIEQAVTDLQTGIGNMVSKNAAQVCQILTSKNDAQLRAIAQSYQQRFHKDLAGV…
>Alen_Al4_ctg01_-_Alen_Al4_ctg01g980t1	MMNAPHAPLFSCFVFCVLLSRSLALAGPINACGFQSDGLARNASSARVTAWVEQPNYRGTFDILWICLVTICISTYTMLCLNVPAPKDTYLQLVGRRTLWMILGIMGPEFVLTYAAGQWSRAKWSVKAFKESGYHEWHMRQAFFADMGGFVFHAEDSDPFPLNATQLHWLVRHHYIDFPSVTKREIWDKSKQDTFTKVITAFQVSYLIIQCAARAAQRLTVTTLELNALAVVVCSLMTSYAWLHKPADVHSPVHIYSAKTLDEIKGNQDWDLTPLDFIDENGPGYSVNIQPFMKMPVIPAERPIQRIPNDRFPTNPYGIQEYLLCLATLLFSGIHVAGWNFDFPTTTERTLWRISSLLLFGITAAFWLFETIASWTRLGRWQTIWLYLFNRGELEKHRA…
>Alen_Al4_ctg01_-_Alen_Al4_ctg01g981t1	MSSVTAVLKPLLGTLAGIVGIYAAFISLLTIPTLQDHVIYLHRVTLTWFQDVNVPEQWGFLRNQVTPFHLKTPDGETLHAWHVLPLETYRQHQDELRDEPTGLCEDIEQRLSFKLLQDDPTARLVVYLHGAAGTLGSGWRPQSYRALSAASTNVHVLVVDYRGFGSSTGWPSEDGLLTDALTLVNFATQTAGIPPERIVVFAQSIGTAVALSLTHHLATQSPPVLFAGTVLVAPFADVASLTKTYKVAGTIPLLSPIALFPKLLALLNHFIISKWPSQEKLAALISHLDSTKVEDRKCKYDITLIHAEDDYDIPTLHSDVLFWHAVNATLEAGSSVTFDELERRKVKERVPLGAGGWEMGWRGEGGIVQEQIVKHGLHDRIMSYPVVSLAVARAFHSQD…
>Alen_Al4_ctg01_-_Alen_Al4_ctg01g982t1	MQSVLGKVIGPKEVHPENLDGRVAVVTGGALGIGYEVSRALALAGVKVIMVNRKEEQGTDAIETIKKEKSDAQVEWKHCDMGNLKEVKSVFTEIRNSLDRLDFLVLSAGINTNQYGTDADGIDRHFGVNWLGHFYVCNQLWPLLRETGKSGEKPAPRVVFEASEMHRGAPPNVHFASLEELNNPDIGPTQLYGRTKLAMILGAKYGLRDHVIKPNSDNIYALSVHPGAVNTAMQQQWKDAYPGITGVLLTNAMLAVGRSPEQGSYSALWALTDPSIEEKDLNGHYFVDPGQPGKETAQASDPALGAALWDLSTRLVKEKVGEDALLDWSAEGKKN
>Alen_Al4_ctg01_-_Alen_Al4_ctg01g983t1	MRANGLLVIGALLNFAHANVVICQTNKLSAEPGLSGSEVASGLGGQPALAAIGHLCNNIKTENFVAHQLELTLFTVTRTGAAFSTRDFEGQFNAIIDKCIVDQNSRGGTIITNGLLYEVNNGIPPVPSGAAGSMSRRTIAKAAKNPTKPKTPTVKKPAPKDPVPKKPAPERLPSKQPTPKSCPMKKPGAKKPAQTPAKKTTRDFFLRLVRKLIPRASPTPSQLSEAEEAAYRCEDEPMAAPAGWGETFFGFYKENPNRRISKATVRNMAKQKYQEVMTLTNDVTIVAALYIPGDGIYFGTIAHGAGEAKFASTATSKAPKLWSKMGNRKPVKETKKGETPPSLYHAEDVAMYNYESKNLRVTASQRYPFGSFIAAYGRKRNLKNGALTAPGLVDPCSDD…
>Alen_Al4_ctg01_-_Alen_Al4_ctg01g984t1	MSEYDEELQALLEHQLKPTLVLDAQGTVIATNDGILRLIRSLPLTTKNIPISDSLIGKHISDLGFALDLEDLPITWKWDDILIAAHRNSHAHECHGNHADTQTIIPGNHSSWNSDEFWDQEAEKLSLVEVDVHFVGESQSGRDTDLSAMRSDSQLKARANVRWHRQGQGVFLVILDRPSLPHRPKNKPAPAMKHAQCTEQSWLMPSCCSSCAYPESGLAAELQSPSNAAEITASLIPYIMATCNTEGLVMHFSKSWYSFSGLTKADSLGAAWITAMHPDDVQRMQSSWMDVLSNELPQWSTEARFRRASDGKYYGFLIRAQPYRDATGKILRWYTSMMDIDEWVTARQEAERRRQAILTLFSNSGLTLWGVDKSDHVYLREGGLRWSPPDMVECPESTL…
>Alen_Al4_ctg01_-_Alen_Al4_ctg01g985t1	MSKFDHDIEHSPLPDQFAPDHRPILEPQLNVGGHGATQRRLQNYHVTMIGFCSGIGTGLFIGTGSAYANAGPAGLLLAYLIVGSVLWCVMQSVAELATVIPTAGSFPHFATRFIDPAVGFSLAISYGYCYTISIAAESSASAILVGYWTDLTPAVVITISLVLILGINLLSVRWFGESEVIAGAIKVACFLGLVIVSIVITSGGAPNNETIGFRYWHSPGAWVDYNGITGPTGHFLGFLAAFVNASFSFIGVEVVVITAAESINPHKAIPKSATNVTYRIALFYILGALLIGIIVDPTNPGLVSGSGNANSSPWVIAIKQAGITALPSIVNACILISAWSAGNSYCWVGSRIILAMTTDRQLPQFFGRTWKNGVPYVAVIAAWLFGPLAYLSLGTGGAA…
>Alen_Al4_ctg01_-_Alen_Al4_ctg01g986t1	MDSPTVELRSALASLFECGKYSDLTIVCGSKRYPVHRALLATRSTFFEGACRGGFQESSTGVIDLTEDDAEAVEHMVHYFYHLDYLNKPLSRQSSQRSTRPGSPAAVTSRFSRRNPPKKLNLAFLEDPLLAQASAASPLMPLTPPAEESVFQPLDASLKLPDTPMADQFTHDYTESETLEPEVDVESAHLLTHAQVYAIAEKYGIVGLKSLARSKFSYQISMHLNSPEFADACQEAYETTFHTDRGLRDVIIQTFRANPDLSMREDVEMVVRETPGLAFELFRMASGLPVSS
>Alen_Al4_ctg01_-_Alen_Al4_ctg01g987t1	MRTPSPSYPAPSLSSPPSPSSPPSPSSPPSPPCHGALDSPPSCPAPSPHLTSTTSTMGDYKLSATLRGHEDDVRSVAFPSPASVVSASRDATVRLWKQESSAPPSYDSTILKTHGKEFVNSLAIVPPSSQFAEGLVVSGGKDQIIDVRQPSKGIEDNADALLIGHGNNVCALDVSQDGKYIVSGSWDMEARVWEVGKWGESTTLEGHGASVWAVLAYDSNTVITGCADKQIRFFHPSGKQLRSIQAPEVVRALCRLPPNHPSGAQFASAGNDAVVRLWTLQGKQMAELHGHDNFIYSLALLPNGGLVSAGEDRTVRVWENNECVQTITHPAISVWSVAVCPENGDIVSGASDKLVRVFTRDQARYAAPTEIEQFNEDVKGSSIPQQTVGNINKEQLPGP…
>Alen_Al4_ctg01_-_Alen_Al4_ctg01g988t1	MSGKNEQGKMDVTQKNVFKAPLHQHSKPAKTIVTGYSSGMCSSEMPLALSLTSSFLDWTQQQGTDLRKSGIKEGARLCTYVNTWKAAVDGGIDDVPKVKLEATHHHALDIVGMDVLKKYAAEQDNKRAESRVVLPKEGKQSIARESKEIGGKEPKA
>Alen_Al4_ctg01_-_Alen_Al4_ctg01g989t1	MVLDAKDSIDERHSVVYEEKVSTPEHLHVLMKAGLSEEDAQFMHDISASEQDKIFHKVDWRLCPILAVLYLISHLDRANIGNAKIEGLEDSLNMSGTDYNIALMMFFIPYVLFEVPSNILLAKFNRPSWYMGILVLCWGTIMTLMGVVKNFGGLCATRFFLGLFEAGFFPGAIYLVGQWYPSDRTQFRMALFYCASAASGAFSGLLAAAIAKMNGFGNYEGWRWIFIIEGIATVLMGVAVFWLLPDSPDHAAGRWLTQDEARFLRLNNISTRGIKRKRGINADGRKERVKWGIFGQVAKDWQIYLQAMIFASNAVPNYGLKFTMPQILKNMGFTSTKAQLMTAPPYACGAISALLSSLLADKFIWRMPFIASGQALLIIAFAILFPTAENIKENVALCY…
>Alen_Al4_ctg01_-_Alen_Al4_ctg01g990t1	MFPSQIDRIVLDSNVSPQSYYHKLGTGSAADLDKAFERFFELCAKAGKDKANKPNCPWAVQGQSGSQLTRKFNTFLETSTAEQSNTIHNKLFNILYKPSDFKKFAQKLQSWYEATSKIPKPGSTDDQDDTYGKRKRQNTFQPKTYKTVVTTNAISGISCGDRITRFKGSADNFKKWLQEYRSITEYGYDLSSAGDLRYSVWKIIANQRFDVPESGIDTKNPILFVNTPYDPVTPMISAKDSTKSFIKAGILRSSSVGHCSTDNRSKKLNEAVKSYMITGEIPKVTQYDPDTENVFDEEPEAPAVNAGVHRKRVYRYPSFFFKREEAASAQQILVDCTKIAVASCAATPLSTLVSLSAAASQSMSISISASISVSELHAPTSTASVSVFVSASKSSVFFH…
>Alen_Al4_ctg01_-_Alen_Al4_ctg01g991t1	MLLKLPDEVLLNIVLRVDTRGTLNFGLACRRLQPIAREALIKKAHIKPQYIWNFVATLQQNPGWVRDITHLALGPVDYHALFVMRNVESYVFRAITKTDFFACCTSICDAVKASSAGSPDLWLETWASGRHFSSMGLSILLAQCLQLEAISVSISYFETESLLWEIFCYNNLLDPGPRRLDKWHKTVRQLLQNRLRGLEITRNPAMHLNGHHRTYERRRVMLTGFVHLRHLVVPYEQIINLFPHNRVILNETLPAGLVHLRIDYCDPRYPLGSKHFVDQLTDDRKAFPYMHDIELRFECGSDCLYSHPDSKAIIDTFQRWQASTVRVVMSGKEPITGDYMQVDLVAKKKSAWWWQQAA
>Alen_Al4_ctg01_-_Alen_Al4_ctg01g992t1	MRAPINPTGRTQRPCTINTNINATISPTSSLYITITTTTYESLTISISSRVPTIPHNGMTSISPSYCSTGHLPEFIPFRPHFLLPRTLQCKEEKTGKAYRHAALMAHLNAELREDGGPWENVERESKTGRGGYNVPVPN
>Alen_Al4_ctg01_-_Alen_Al4_ctg01g993t1	MALLDVIGCVIRSPTLLLLFSAALVFAFVIVHTFFVRKLPTNAPNAASDNYPVTGPWGFWTERWEWYRRRRDQSTTGNFSFHAGPNTIVALAGEESRKLFFESRELGFAEGYAVLFGVAPATEKYDSKERAEEDISNHFSRRLAALLKNDQFRRKLSTLTSDMQEAIEAIKNDPSGRTNPFESIYWVVFRLTMRIVGAHEIADNPELLEETLNLFEYIEASTTATSIILPKFPSPAVLKRTYAGARLYMIIENIVKRRAASDEKHDDALQYLLDQGDRTHKIVEFIVGALFAGLLNSGINAAWVLCYLATSTEWLAKARDEVCAVAAKYARDPTAPLRYQLDDVPLEAWEAEFPIVDLCLKDSIRINLLGTAFRKNISGRSLPTGNGMEVIPPNAVVTY…
>Alen_Al4_ctg01_-_Alen_Al4_ctg01g994t1	MTAPTHIHELPTEILHLIASHITSLSRAKDLANLSLVSQRWRSIAQEALLTTPVFDILLIHQYTLQLLYHPEARLRVRTLEIRSKSRRQIVHLQGGRTMDQYAPITASDTVLQREHFTPYYLKIIELFTESERDRKNWAVALTRDGLPALLGILICILPNLKEFKCGNGWLMDFALLTMSMHNEQQIWPTRPSVDFLSKPLEILKTQIEVLEMPANMSGMIYRPRDSAIFDFRGFTRLRDLGLSFSVLCGFPVVHQTLPSPKFIFPPTLEILRISEGLYNVTDFLSLLFLDKKRGFFPELYRIEVFFEDDIEYIVSEARVNRVLDPILHLPRMAADAEVELYMYFPHYSLHTWKIGGTPWRLKQEGLEVLQIAEDQAYFYTLGYTPFGFATDMEWEHDG…
>Alen_Al4_ctg01_-_Alen_Al4_ctg01g995t1	MVLPQALSECSAQAIKFPTIFGATFLSVQVSLVQNHSLIVPPEYQLYRDDNFGRNLSFCNVTLTHTHPGQTDVAVTQVWLPIQPEWNGRLKMVGGGGWIAGLEWFTDLTMSVAVAESYATVTTNGGVCSGGPDEWALLSPGNLDQTALQNFAHVVLRDAALAAKSVITSYFDRQARFSYFDGCSQGGRQGLMFAQRYPDIFDGIQAAAPAFHTEYIVASHFPQQIMNEMKQYPQPCELDALTNLAIESCDAHDGLLDGIISDPDACHFDPYSAVGKEINCSSSSSSKMLSELAAVVADAAWNDGGLAGTVCSSNGTCFGKGNSLAAIAIRLFVKKDRDFDVSSLSRREYEQVFREAFAEFDSTIGTRSPYLYDFQQAGGKMLTYHGIADESIPFRGSRQ…
>Alen_Al4_ctg01_-_Alen_Al4_ctg01g996t1	MLFFKSLLLASIFNSVYAIGRAIVTNQCDAPIYLWSVGGSVSPQTILPKDSSYGEVFTSDPFSGGIALKVTSTPGGIFTPNASQLIFAYNLDDTDVWTSHAFFRPALTNEGFNACCNTIRSVYPSKQNWKWMFAIRTDTDSASMGLSLLIALASDLKIMSLHTTSMIDSDLLTSIFGNSGYNQDAHWHRQVFTVLQSRLEQLTIWDDRYGTRINLKQFSQLRVLVIPLYRIQWRTKGVRVCSIPPQDVLPQSLETIAVCVADNKFYWNLSWIDRITEGLSMFPRLRSIEIRFQENLWSTAYSLTKMSNYCQSNLASVTAWKSAACEVTTMVGNHKLRVHQLDPETREDEIRHEWASMQFENCDLAPAMTRCASLADRYHRPQWLSVAVEQNMSFEELEE…
>Alen_Al4_ctg01_-_Alen_Al4_ctg01g997t1	MFVNDMPTFTYTAPVHVLSTHKLLYKEHSHLPHLNSTSYPFPVSQTPYAPFEFALRPNCKQNYDPIKAPFAQFRELQLASARSYTYTWLALQPSNSFTVYTKSLLASLNAAAPVFTPPHSHAEALKALLDNGPVHVAITTEREDAAASPDSPLFLKGVRFDPTDLHMWYGKVLPYLAKCTFVVSSTVDVTYGGSIFGSTAVPHIYNAVTKVELPKFYWFSGVALNRHHNPYLQMCRNLPNLRELCLTMQTTGLTSQRWPERQIVALERTNPEASKERIILSLREVVHRYDLDALFACTSLRRLRLEYIESAMTAYFCRVGNPVDVLQAIKMYLAQGFAQRGLEVAVDLARVDQVSG
>Alen_Al4_ctg01_-_Alen_Al4_ctg01g998t1	MINIDFMRFPGEIRNSIYSTIIRGLPQTITFSSLPAIAYTSLPIHQEFMSQYLPQLHFDIVSMCDIWHMHAVLDSHPRSLGWHRITKLTITNFTSIAHTQTRANEVMDFVCQFTLLANLIFDITLDDLSHGFEGRTKDIHHIFTEFELFRLLTFNSLKYLVINIRCNGLSLTPGSFALLSHLKEALTADTDIEVTLVLRE
>Alen_Al4_ctg01_-_Alen_Al4_ctg01g999t1	MVPRTVDSPRDSSEEEGLPSRAHTSTPDEKKKKPWVVMVVLAFALVAIIDMGAFLAEAPRTRVYEANICLRFYRETDPSVIGADGAIMEKLCKVDAVQQEMAMIFGWQEMFDAIPSIFLAIPFGILADKVGRKWIFTASLMGLQLNSAWVLGICYFKDLPLQLTWLSSAFYFIGGGPIVAAAIGITMISDIAPPEKRTTIFLYLTASVLVAEIVAPIMSARLMESGDWYPLVLALIFQQAGVLLAVFFPETLHMREKPNHEESNARMVQIPAKSHAFSPGQQLQHFQDAFRFLKSDRTLALVVFTFMANRLGRQGMTLLVRYASKRYGWEIKQAAYLLSFRAATNLAAVAIFLPLANFVLLNYVRLPAHWADLWIARGSIILTAISFLVIGLAAYPAIL…
>Alen_Al4_ctg01_-_Alen_Al4_ctg01g1000t1	MLARASSDAGARLRRSKSASTVHRHGPRTIQPLDPNVAQQHAIAAATAAYTRSQAQETFERKAKGSVELSRSKSTASRKSLKSQGSHFPPREMSIRSVPTRNDAQTSSSHRLFLKPASNIEKSPSSNPRSGSERPSSLARPSSTQPSVTSSEYGRPASQPKSHRQGAASSITSQQIRKARSMYYASSVQTGSPIARPPAKYLTTPPPVSANPVVSTAPAAYVPTRRAGPSPLAVPRFPVAVAPNETIDEARDKHLQDFQQRPVKHKPSLFLAPFKKRQVKRTSSPVLSTNYQIAEDSVIDITVDDFIPQPDINDRRSFSGSLKRKIKRVFRRTSNKSAILPVQQIEASREYFGIVTTDDALPQINDSVEIPRPNEMLLESMRSRTPSVEGGCQYLIRSK…
>Alen_Al4_ctg01_-_Alen_Al4_ctg01g1001t1	MRPKKKRSLSANSDVEPRKKLQLPATSVPLSSAILNHSQPTATANSPGTRYVDPGAAVDADPYSTHPLNHNTSQIRVLSLLPDGNRNAALMGKLRVVDLVSEKPKYEALSYVWGSPDLSYELHVQGGLLKISANLFAALVQLRDARAPRDLWIDAICINQTTASEKNHQVGQMFRIYSQAWRVLIWLGEADEESDRAMSCVANRHYYSLGLHQASSIFTRPWWSRVWTLQEGFAAGPYSRVLCGNRTVGWEALLNAYKSQLPISWQLQEGDVAEFVRAYTKHQIWSSTLEGMFWSSTLREATDPRDYIYALLGPIDPTIKTFLQPDYTKPVSWVYQKAMVAMIAEAGQLDLLLIRILQKDSTKPSWYLDFSTTDGLQRRRKIVAKLHKSSPEGAFSSVV…
>Alen_Al4_ctg01_-_Alen_Al4_ctg01g1002t1	MAHLLSRQQVLDSGTVSQTYKAAFDARPVDISGTNISEWRTSRAEHLQKLRHLYPIPGPISDLVTETLHDVPTRDGASIRVKVYRPVKGAPEGGSPLIMMYHEGGWMMGDLTDEDLNCRMFTRDLRAVCVNVEYRLAPEYKFPIGVNDCYDALKWAVANAEMLGANPKRGLIVGGASAGGNIAAVLALLARDEKLDPPITGQYLCVPALLPDTNVPRSIAHLYESRLKNIHDPVLKGGLQPGSIEPIYEPDLNSPLWDPFNHPKGFKGVAKAFFQVGGMDPLRDEAVLYQKRLAEDGVLTRSELYRGYGHMFWTNYPELEESKKFVEDTLKGVKWLLEDIKA
>Alen_Al4_ctg01_-_Alen_Al4_ctg01g1003t1	MNSVRAIQQLNKRELEAGINPEGSWHTDYRDTAFIYIGGLAFELSEGDIITIFSQYGEPVWVKLARDKETGKSRGFAWIKYEDQRSCDLAVDNLGGATIMDRVIRVDHARYKPRDDEDMRDNTMGDVDMDAVNDSDGGRRKRRKSEEDSGSDEDRPLLPEEIELERLMEKLDVDDPMRDSMIKQQQEKVDEAVAKLKRKMRKEKERKSRHERRHRKDGSRDRHRDHDRRKLKDVEDDDRHDRRSRRKDDRSRSRDRESDDGRRQRKSRHRDDSGDRDRRHRRDRSRDQRNRSNERNDKDRDHRRRRHSSDSADDRKPTSKRSPSPYRNRSP
>Alen_Al4_ctg01_-_Alen_Al4_ctg01g1004t1	MASARRVSGFPTRTAGSNDRPGSRDTEKEEIWKPMLDNISSGKRLPEKSLLVLGGTPETQREFLESVSTDGPNGRRQQDRGRKPPIANQFALGYTYQDVLDTDHEDTLARLSLYLLANPSPSFTPLIKPYLNPRTVPHMLVVILLDWNHPWLWIRQLRDWIRVLRSLVVSLDDASKEVLHENITILQDKGRTLGGEGNTSMENVKIPLGSGEWDEPLGLPLCVVCQNADKIESLEKERGWKEEEFDFILQYLRTILLKHGGSLIYTMPSAPGSLQTLIHSTLGIKSLLKQEQLRHNVTDRDRVLVPPNWDSWAKIRILRGNFEVEEISEKWSVDIDIPERPARPNVQSQAEIDGAVGATSQTSPTSDQEPDNSATAIYEKEIRNPEYDFSLSTLSKHGN…
>Alen_Al4_ctg01_-_Alen_Al4_ctg01g1005t1	MPIMKDQFSWTPLWPLIVNAPMADNAGGLLAATVTLAGGFGLVGSKTDMGITRRELNIARDTFAAHPEAPQSKSQTLNVGVGFLPFVLKLEDALEVVREFKPAVVWLFAAKKFDDYAEWAKAVREVSPLSKIWIQAGSVASALQIAKQTQPDALCLQGADAGGHGFEKGAGIISLLPETSDAFGEAGIEDIPLLASGGIVDGRGVAAAMSLDAAGVVMGTRFLTSTEALAHPVVQSSIIEARDGGQVTTRSKLFDQLRGPSTWPEVYDGRSLMIKSHKEYVEGISLEDIQKKHQEALKEENLGWKTGLEGRAAIWAGTGVGLVNRVESASQIVEDVREDARKRLNLLQSPSPSGWPARGGT
>Alen_Al4_ctg01_-_Alen_Al4_ctg01g1006t1	MSPSKHQLSHLSAWLREIRAFKVSNRHHDDQENTELQLLTSTMGADPKASPTSSRVQGWRFGAINCGIGTAVVLLINFIVTVAYGIQARDGILFSGDCDQAKQINSGLHLVINALSTILLSSSNYCMQCLSAPTRKEVDAAHADRKELDIGVLSMSNLLRISRKRAVIWALLGLSSVPLHLFYNSAVYLSIAVPDYRVIAVGESFVSGDPITNFTMIDAMTDKLIAWDTETKTMYESARDGSYDRLETLDCIKAYAQMVQTKRRNLVLVASDNKYPESTGVLLKYGLGSHIFWDKDFRGRDNIQVEETSKAFRWMCSSVNVIDANCPVEIAQFKSAPDTWTVGAFCSDALCGSSGSVVKMQMKGPIEYCLSERAEQHCKVQWNVSIAALVTVLNFFKAG…
>Alen_Al4_ctg01_-_Alen_Al4_ctg01g1007t1	MALRIPFLGRLHLREYFALVLSILLIALESVIAVITLALPTPIINACYRITRRLFNQLSSPSSRRSRDRKKDVWSAIANAGDFTELCEIYGYYCEEHIVQTGDGYLLGLHRLGWKRGEEGERVNAGPGKDGLKKKVVYLHHGLMMNSEVWVCLTERERCLPFELVERGYDVWLGNNRGNKYSKKNIHVAPTDAKFWNFSMDQFAFHDIPDSISYILETTHQPSLSYIGFSQGTAQAFATLSIHPTLNEKVDVFIALAPAMSPKGVASGTVDSFVKASPDILYLAFGRKAILASATMWQSILYPPIFVRLIDASLRFLFGWTAVNISPDQKLASYPHLYSFTSTKSVVHWFQIIRNGVFQMYDDEAPSPINPNRSKYYKVAKFPTRNIKTPIVLVWGGSD…
>Alen_Al4_ctg01_-_Alen_Al4_ctg01g1008t1	MPQSCKDIRAALAFCLQNSDCILVERNSPGDCLRPPLKYTLPTQCQQLQKGYAECKKGMIDMRKRFRGNRPISVQGQLETGAFGQGRAEADEKAGTIEEKGYMLYAGRPYQAVNETKGDQDPENKGLDR
>Alen_Al4_ctg01_-_Alen_Al4_ctg01g1009t1	MRRAESGEKEATRRCWECLKRRLVCDHTLPHCKKCKKASKECPGYDEQKPLQWVEPGKVTSRRRKKDSPPKVYTIGLRKQEPIASAVPSLATVSDGDSEKSDSSDTIAADDVSVLELPIFDEPQITQEAVDIYKCYLAYSLLQEEKVKWWNKLSTEEHTEHITLMATKHAGGCDVAARIVQIGGQKNLKAVVERGQYWEAALLLQSERQPLERLRRLLWVMETQDLPSYEHLSNETCEVVQAVNYFNTRIYPDVKETDSLAPNAAVIHFPVWALHVLPPAMHHTLVCLGLNHFIHSLPAGVDRVTIASHRSKIYKYRGHAIRSLSETVAKEKTRSSDLTISSILMFMAMEVQNSSSGDWRSHANGMKRLIDMRGGFATLIREAPYLTSALVIYVLIVTF…
>Alen_Al4_ctg01_-_Alen_Al4_ctg01g1010t1	MSTTINTDFIRTLRPDSTHTELETLRTRISDENITEILLNAVERGSLSTSTFAAWLSVCRSPTIIERSLRQKTSVKIRNLGIGQLKKGLGSANWEELWDGLGGTTGLLDIISGLSVLEVRAICKAIGRSAKSRDIDGKRARVTELFEGLHPDIFPNAKTKTTDSRPLTKYYQALVPNCDQEAVDCFTAGEQSRKWKYIREKDLLEQNSSRVGTTLLHLVSQNQHVDEKSRQRLEALSTRFPSTTTPEPGFSTSMAFAFELLSTLVETGTCCVDSDWVVQKLIQPLLRRAVRKHKSWSGIQSITALILRYLEGHPSAARSLTTARGGVLHLVASCWSRRSALFQMHLKSLLKLAIGSTTRLGDFSHLLAGIPKSRRYSLLQLCCQEVMGIDLDSEQSLKK…
>Alen_Al4_ctg01_-_Alen_Al4_ctg01g1011t1	MRNLPRPILLIIASYLSQNDLCSFALVARNFVQAGQDTLYQHPIVPPPHKTDREDQTFNFLRTILDNAALAAKVRSIELYPQQEAVEQQQVRHVTIDPAALSRTAPHRLGKLKNSSSLVSEYALTGAILWNLPNLEDLRYEVYCPIDGLMPGLTKFGWFEARAQWPLELMFGAKKKINFVPGLKRLKRLRLTAPHIERRWCELPMLEYLYVGFDSDMEQRSHQSVGKSPIRTMEMECSTWALQEYGFYGPMKDFFKGFDHLTHLTLRIINQTDPSHRIINDDDTDAEDNQTDNLLTYLEHVSSKLKTLRILVHADPRGFHAYFVTWVEPASNWASFTELRHLQIPYGLFLIESVENRTKLRVPESFPPKLERLELTCATIETRFSEFLYAVVDRIAGHA…
>Alen_Al4_ctg01_-_Alen_Al4_ctg01g1012t1	MSAPARGMWGPGGQPGGGLNHLQGSTGGSVNSTHSAAFDHLVNVAHQLVTRTTAGSVIPANINIPQGPANFNQHYTVWYIMDEAVADEIRRILAFAPIDIRRVADYFLRPRNQSPYDAVFGTGVRDYSPVVARTTVHARQLLTQRPSYLKAFVIHSRGAVNLTGCTNNCAAAVRGEKTFTAFLGCVSIGGEWNGACSNCVWSDGGARCRFANPRTGSSSKSTNGTSGAFGRSGGRAVAAPVEEGHFSDAE
>Alen_Al4_ctg01_-_Alen_Al4_ctg01g1013t1	MSIHTVINSTTPATAMVDNGCCTYCLVNEQSVRKMNLPRIPITPMTIEGVNSQRSTITAITEFTLDVGGVQQHRVAAYITPSTYDYDIILGKTWLEDVGGVISTKDKLLSMERYNVTVRSTEVLTPLDCCPVSAVAFQYHVRKSRKENSGIQVFAASMKDIQKALKPKTQMTVQEVKAALPAYLQSYVKLFVPEEGNKLPPHRGPTVDHTIELNEVDGKTPEVPYGPLYAMSRDELLVLRRTLLDLLEKGFIRASNSPAASPVLFVRKPGGGLRFCVDYRALNALTKKDRYPLPLIKETLNMIGRATWYTKLDVTAAFHKIRIAEGQEWMTAFRTRFGSYEWLVTPFGLANAPSTFQRYINWALREFLDDFASAYLDDVLIFTEGSLHKHHEHVRQVIK…
>Alen_Al4_ctg01_-_Alen_Al4_ctg01g1014t1	MEGDSLHNQQLPSSQPTYEQQMQSQHLYEQQQDPLRNLSVDDLIATIRSLKANLDELASKQERQPYEQLQSQMNELRGMLSNNARPETSERSGQNFSSGPTPLSDHRDYTVQRAEKPRLPNVEVFDKGSHEQYLQWKMKVQAKLYGDQPAYPTEKDQVNYVITRTTGQAFNALSPMIMSLMNGTTLPTLEKAWAYLDGFFKDPTAQEKALEYLRTTKQGKNDFNLHVQKFNLKLQEAALDGASHAQKIDYLKNSLNSKLLRAQAGYQPPGLETYEQFVQRARITWENLKAVDRITSNSYSTRTYDSPSSQENPRRNSNEMDWQPTVGAHQPRTRKREYWGTDKEIRERRTTGACLKCGNKGHMVRDCKKNVLSKSPARTNKRKSTSRIPKVAAIQPAEE…
>Alen_Al4_ctg01_-_Alen_Al4_ctg01g1015t1	MVNFASILSGAVAASALIGGAVAHPGEKHDMAHVKRQIDARQVRAAAARRSLDNCQDYLQHRSLMQRSHARRSEALNALRQKRGINSKSKKFRRDLALLQEFEAINHNQTGVLDYSANTDASTVFAANTSCILAPEVTDGPYYVNGELIRKDVKEGQAGIDLYLEVQYVDITSCQPVPELFVDVWNCNATGYYSGVGSGQGGLNTTFLRGIQETDEDGVVAFETIFPGHYDGRAIHTHLLTKSNVTVRENQTTQDGAVTHIGQLFWHEELRSAVEATSPYNENTQAITSNDDDMWSIVQTENEYDPFPQFVYVGDDITDGLFAWIQIGVNATADYTDDDYYSVAATYQAGGGVANADSGIFGGDGAGGNGTKGGNGTMPTGSPPSGAVATSTASS
>Alen_Al4_ctg01_-_Alen_Al4_ctg01g1016t1	MELLWHIQHGTDTDAQTIFSRLREGDDPSAILGPLGTKAQRENASTESAAVPHSRPLHTHTKQHIDLATSDKLIGHPDLSDSATLSATLRSQGDVLTEAFSIFLKCTSSIFHVYTQEEVDALLSKSLETDTQTPLSTLCEVCAVAAVGSRFSRSRISPELGEYYSSVTKQLLDECIEKTPLQAVKVCALLAMCNIINKATAAFAYVELGLGVARIKGLLERTPHAHMDHSIWLESKKVVKSLLACRGWLQATLSYIPETEPPVRLEDVDGGDQCCLDCEDQTLYQTQVARLTVIKAGIFQQMRSIEFSKESSEAIRLSLSQWLDQVPEHIRLENLGKPTVSPEAHISGLYLHSFYLGSRMLVYRWILSWIIQIRQEGIVPPPETKNESSRCADEGLIAA…
>Alen_Al4_ctg01_-_Alen_Al4_ctg01g1017t1	MSLPNCDSDVALPHAGLLSYFRQHDGVDGCDKSAQTAHTASHFPSDAKHKVFDEEAQSDFWDVGNITDTEYDDLPQPAHRRYQGMFQSFHDFWSFVCVVALVSCAIYLSLDLTLSQYGMGMGLTDRIMGKHLPPPPMARELHFCLASPNREAPGPQTWHLMSSRPHDDCTTEVATLLATPSEVWKLRSDGDIVFGDEQQLRPDSIRVGKFLGVEDLLNQRALGDNIAEEGVLRLNLTADLTYNILHTNKATCVDAGIYNLHNRCFEIYGPSQQAHLERYLASFSGIEGFRAVRRLGVLRFSELQAQEVGSSGYVKLVGKCTGIPEFKLAFKATRSSAQSVLGTLAYGRKG
>Alen_Al4_ctg01_-_Alen_Al4_ctg01g1018t1	MMSTVRTFASPIARAAFRPQLVGTSANTRAFATSRIFRAPALTEAITSDHRELEKCYKIITESKNIEDQTRYGNQFIWELARHSVAEELIVYPAMEKYMGEQGKTHAEKDRKHHHTLKELLKTFQNMSAQDSGYVPQLKKLYEHLENHIKEEEKDDLPALEKALTSEENRGSSESLAKSFSRTKMFVPSRSHPAAGENPYVEGPAGLPVAVFDHIADLFRKFPEGTISPNPSQK
>Alen_Al4_ctg01_-_Alen_Al4_ctg01g1019t1	MEISSNLPQKLVAAMAPSSTNANTNQNDPLQHPLQATAMAIQGAVQGEGRAPRMSHMASANEGPADIIAKVSGAVQGGKREDDSAYFTNNEGIPFPDPAHSKTIGGIPVASDVFLFQKQQHFNRSKQLERMVHPCGSGAFGYFECTKDVTSLTKANFLSSVGEKTPIFIRFSTVTPGREFPDEARNPRGFAIKFYTGEGNYDIVGLNFPIFFCRDPIQGPDVIRSQYRNPKNFLFDYDGIFDLLGCTPEGNHAGLMFFSDHGTPKGWRFNHGYGCHTFKWVNAEGRFVYIKYHFIAKHGQKQFTQEQATQMCGEDPDYSKRDLWETIENGEEVEWTAKIQVMEPEDADPDKLGFDPFDVTKVWPRSQFPMQEFGRLVLNKNPENFHRDVESAAFSPGSM…
>Alen_Al4_ctg01_-_Alen_Al4_ctg01g1020t1	MASAAHHGVNGSDANGAASSYAAQFDLAPHFIGGNQLSAAAPGKVKDFVAANDGHTVITNVLIANNGIAAVKEIRSVRKWAYETFGDERAIQFTVMATPEDLQANAEYIRMADQYVEVPGGTNNNNYANVELIVDVAERMNVHAVWAGWGHASENPKLPESLAASPKKIVFIGPPGSAMRSLGDKISSTIVAQHAQVPCIPWSGTGVDEVEVDSQGIVTVRDDIYEKGCTKSWQEGLDAARKIGFPVMVKASEGGGGKGIRKVEREDEFEQLYKAAASEIPGSPIFIMKLAGSARHLEVQLLADQYGNNISLFGRDCSVQRRHQKIIEEAPVTVAGSKTFQEMEKAAVSLGRLVGYVSAGTVEYLYSHADDKFYFLELNPRLQVEHPTTEMVTGVNLPA…
>Alen_Al4_ctg01_-_Alen_Al4_ctg01g1021t1	MVGGETPSSPPPRSGGWGSLREELDYYKTAYETLDAELQEFQSSSKELEAELERDVEESEKRERKLQEKVERLGFEAEEWKTKYKQSKTEANNAQNTLQKEITSLRDAQRTLQLRLRDMEVQNDDFERQTRNQTSSLEDVETKYNVAIEREVMLEEEIKIGEREREGLRIETQRLRDELSDLKIESEITQEKLRLAEATIEKHHQRTVSNHLAKDSSTLRPRSPMSEASTTNMNLSSPTAASTPPYLPPDALRPDSTPPSPPLSDAPLAIRPIPFTPPVPTRKASIAHRDPAATPRAGAFARPRHTRGPSVSGIPASGAGAGGRRTPSIMRPPSAVPGQRPARPSMGSNTPAAGLPRSGSLYQIRGLIGKMQKLEERVHSARSKLPAPTSTPPRASPRA…
>Alen_Al4_ctg01_-_Alen_Al4_ctg01g1022t1	MSSYTYIYNSQLDAFSLYHLTHEQATKHSTLGPALPALGHATSGALGTAVSKLITYPLDLVVARLQVQKQLQGENERPRYDGILDAIEKIYEREGGLSAFYNGVPHEVFKGVTDSFLFFLAYSYVRQSRLAANGGRKSLGAMEEIGVGVVAGAFSKFCTTPIQNIVTRKQTAAMTALDGNTGTPPPSSTRDIASQIKKEKGLQGFWSGYSASLILTLNPSLTMLLHKVLLRLLVSQGKRDDPGARITFLIAATSKALASTITYPFQLAKTRAQVSSQKPTETTGETSEFGKAEKAPRSGAMRARQRTVFATILRIAQTEGFAGLYQGLGGEVLKGFFSHGITMLMKERIHAVIINLYYAVLKSMEKFPSAEELKQMASDQYEDGKERVGEAYTKGVEVA…
>Alen_Al4_ctg01_-_Alen_Al4_ctg01g1023t1	MRFSLATVATAALIFSASAAPHRDISKARGTDTEEQDSPSHGRYPDGTFPSGAFGSKGVAGPTGGYPAFPTGAPGASFERPSDAGKFPSIWKTRADKSDSSSSSDSSSDSGDSSDSSKSSDSSESSDSSESKDEESSSGDKETSSGSGDEESSSDSSSDSSSDSSSDSSSDSSSGDKETSGSGDDSSSDSSSGSSSGDKETSSGSGDKESSSDSSSGDKETSGSGDSSSSDSSSGDKETSGSGDSSSSNSSSGDSSSSDSSSGDKETSGSGDSSSSDSSSGDKETSGSGDSSSSDSSSGDKETSGSGDSSSSDSSSGKNQSSSESGDEESSSGSSSGSGSSAPSSGSSNSTTPSSGSTQASGTFPTAAGESTLSKPMEVTDFDGGMVKFGRGVSCTSGE…
>Alen_Al4_ctg01_-_Alen_Al4_ctg01g1024t1	MQFLHSLYRALTFWRADPPSEVRSNSPSTCLSIHDLQHSITITSNILTPQPHPSNAPQPPLQPPDPAFSKFIFYQNMTPNEVLSPLPSLPPFTHHNAMINDSCTDFEWD
>Alen_Al4_ctg01_-_Alen_Al4_ctg01g1025t1	MMEVQHPQSFDWANDAYAAFSDQAKHQNKWAAFGTSSSPLNTTGAFTIPPALLTHSTEQFGQITPPEDRSPADSARGARDGSIPVEELMNEALWPQLTLNTTDRQPTQVESQQSQPPPEDSQPSLKRRRASRQSTSSQAQANAATQQDDDPTANPQPPKRKRGRPKSQPQMVEAYTADGYPFQVSSARQSHLEKNRLAAHKCRQRKKEYIGGLEGRAREFSAKNKALKESVAILREEILSLKNEVLRHAGCGFWAVDEYLARCAGDLLNMQTPDASSSQQHVSPSMHQMRPRQHSHDSMPSMGSMSSTPGADGFGGLELLKEYEDDVDDHS
>Alen_Al4_ctg01_-_Alen_Al4_ctg01g1026t1	MGYIKQITIQGFKSYKDQMQIQPFSPNCNVIVGRNGSGKSNFFAAVRFVLGDDYNFLNRQERQALLHEGSGSAVMSAYVEVCFDNTEDRFQTGKPEFYLRRTIGAKKDEYSVNRKNATKSEVIQILESAGFSRSNPYYIVPQGRVTALTNMKDKDRLEMLKEISGSNVYETRRADSLKLLTDTDSKCANIDSVVESINERLGELEGEKEELEAWSKNDRERRSLLYTLKSREEAQLEAQIEHIDSLEHHGREMREDNEAIFRRNEDDITRLESDINQRRGDLDILRQDRVQYESDRKAATLEKAKIQLDLKALQDSQASAQQTKSRRDAQVKTLQQQITARQVELQQLLPQFDSKKEEEEAVRAQLLDAEGQYKRLQDKQGRTAHYSNKRERDTALRAQ…
>Alen_Al4_ctg01_-_Alen_Al4_ctg01g1027t1	MCVRTGQVCPGPLEGPLIVDMTAIAKKGTQERRSLKQVPQSPANSTLLGSANAHILLQAVNTEAFYRQFLAYFTTEGEGQGIQNRLTWLQRLPNIATDGTDKALVLALEATATAYSAIMSSDTALTQHALDLYGTALRANHSLLQRSCSKKDFTIHMVSTSVLLSFFEAMHTTTADGYRSHIYGAAKILELTGPGQCAHGVLCQLYYHVRTQMLFIQLASGENNVPVSAKKILHDTLRYKNPPTIQKLMSCIATLGHLYAVQYETEERDIYAYGLLEIQVNELWNEYGNMMGRTSSDATWLDNTQNGVMFSNAFTALTTAYFSSAHILLARLASNATDFADSMDHFQVVLHAATYLNICHDAVAYMRMATPLLLVAMHAKCHRQRKQVVDIFELWSSGS…
>Alen_Al4_ctg01_-_Alen_Al4_ctg01g1028t1	MPDSPLRHPKRRCFVKQGIAANRNDAHAIYRAFRDCNNGGTIILDETYRIGSPLDLTFLKHVDVVLTGEIHFDDSDVYYWAENSFKYEFQNQSVFWKWGGMDVHIYGDLSKDGSLIDGHGQAYWEEIRTNKSLFRPMLFAFDGMKGASMSNLRMRNPPHWFNIIANSSDILISNMDLKARSLNNVTIANSDGWDTYRSDRVVIQDSVILNTDDCVSFKPNSTNIVVQNLDCTGSHGISVGSLGQYANKTDIVENLYIYNVSLTDSSDGARIKVWPGIATSFQTLLNGGGGLGRVKNVTYDLFRNVNNDRAITITQCYGQKNQSLCYEHPANLTIEDITIKNMFGTTSGKLDPQAGTLICSAPDRCGNIRTENITVQVPSGKAPTYALQGLAKLVANAVC…
>Alen_Al4_ctg01_-_Alen_Al4_ctg01g1029t1	MAHSHGPTCIPPANPLLCAMCNEEGARCSGCLEVRYCSRSCQRSDWPVHKLVCKAFSEFSDASRPSIHHKRALVFAEDKDLPCFAWLHVQPREDNNEITSDDLEGKVPVPQLEPYLGTVEEFLSEGGTEREESTNPVLRRKIGHGITVAGRQRTNQIDSLPGSHRANKSLLAVDKELPEIWSGNVVAYGFMEDTERIQDLDLMDFRHVVDIIRHIYDHVRREYSGKIDGSTVTGAFIPCAAEEKLGCRVFEILPVSAAQCDAQSEVASPIMTRIGIPLVFRRLPLETRWRDRKLGLPRELIGWNPTLRPFDPTIPLCDRRHGVGSAVVVRKDGKPLCQTHVAAFVDYARNKVASYCHDNHETARGVLDSCTKEDFMVWYDGWKLQASCMDVDVPSPYDV…
>Alen_Al4_ctg01_-_Alen_Al4_ctg01g1030t1	MYRNVVFTAATNTTMGHQDHTTSLSEAAPAYDEHGFNHEHPVNALPPSSSTFAYATVPQNEPDMELAHNHTAPTSYNAPTSFTPHQHCETCDAFTSKRESRANERHCCLWTSIVFMTISVALLLLGIVAIDAKYKHHKD
>Alen_Al4_ctg01_-_Alen_Al4_ctg01g1031t1	MKLLNLVSGLLCATSALAFKKPAKPTLPRSVVERRVANQPFSHPEIQKRASRFLTGKTEPFAVNGSGIPEVPFDIGESYAGLLPISDSPDETRKLFFWFFPSTAEQTPEEVTIWLNGGPGCSSLSGFLTENGPFTWEAGTLAPVQNPYSWTNLTNMLWVEQPVGVGYSQGTPNITNEVELATEFRGFYKSFVDTFNTKHWKTYVTGESYAGYYVPFIADGFISANDTDYFNLAGISINDPIIGDGTIQQQVVILPYVEFWQNLLYLNETFLEQVRERQESCNYSSYLDTYFKFPPPQEPFPLLTDPYSTDTGACDMFNTFYAAILEVNPCFNIYHITETCPHPYSQLGIVNTGDYSPPGAVIYFNRTDVKEALHAPLDSNWLQCTKTNVFGNGSDIGSD…
>Alen_Al4_ctg01_-_Alen_Al4_ctg01g1032t1	MEAQRNRNPRPLLPAINRPRSPEIKHKHKRPRASVACETCRIKRTKCTAERPTCARCRSRDLECQYAVDSDDENRRKALKKRFDWADSERNQLRDLFNILATRTESEADEIYRRLRSSGDPIRVLHAVKQAYLLLPNPGPVSQLSAHPQVERLDAEAYRLSPLKLRARPWTAVADDGLVSSLISAFFSWDGYYFLPFVDQKCFLRDMSTGDIKRSKFCSPFLVNAICTIQFYSAKVKMIRTATGRDLCELFDAEARRHLEHDMEVPSLPTAQGSVMMFMISAYFGRDRAGAVYRHLGFDMLDCLTIPESLSQISNPDEKRAYCRTAWGVFCCESILAALQNKMPALRIPTVPRLFHEQAEPSVLIENVDLFGEIFTSASPRPPFAPGVFNAACDLNILQ…
>Alen_Al4_ctg01_-_Alen_Al4_ctg01g1033t1	MVGGATLSMLSDSSSALVSSTVTAGPKKGKYSKAKCGTYDDKNNFIDDEPEGGDSSDECRDGTALNGEEGKGKRLAIGFSAPPRRRPINSIVTGIVDPLTISQPANHISLQDLGLSELAVELSSKTTPLLDLFVQRIHDHDIRCDVLPKYTPNIDTIQHILDLPAIRN
>Alen_Al4_ctg01_-_Alen_Al4_ctg01g1034t1	MVYTIIVHLYAKADEESISKLKAKLVEASQVYSKDKETLSWFVMQDTVDPRKFSIVERYQQESSQQYHLNNPYWKTFDPYVLPLLDAPMDLRRLEEMDTGATAAGAHYHQDALKEDTTVANMYKDAN
>Alen_Al4_ctg01_-_Alen_Al4_ctg01g1035t1	MSTSQLSNNKTPNPSNPSTLKPRYEIRRLEPKHAKWAAAIVSHSNGAYSPVWPVIYPEKGGKDIIQLAHDADYLVMHQINSGLSFGVFDTEYVFKREESKATGGKLYWDISEPGGKESQELKVEAQRLLQQMDFPLVSVALSYDAFNALDMVKMEPLLAALPHFGLAYHILEENDRRDPESWKPKGPNEVLLRNATATRRDYEGEGIMAGLARWLMREADARGFRGIQIEALADAVTHVWSTAEPPYKGAVVSEFHTADWKDEEGNVAFAPAHQRITKIYVDLKAQA
>Alen_Al4_ctg01_-_Alen_Al4_ctg01g1036t1	MLRTVVARSSRAFPLVLEARRGLRSQAFRAGPTEPALLEQTVPEHFARVVRQFGDRNAVISHHQRKILTYEALDRDSNALARGLQKRGVKKGDRVAVSLGNNVEFATTTYALFKLGAILVPLNPAFNAPQVLSALNHLEAGHLIIGAETNLPRKDPRSNVPLLTHLVPDLTGAKLESELVPSLRNVIMVDNAQGRIDCAVYKSTTRYEHVLEDGGQGSALDNQGLDPHDIVNIQFTSGTTSMPKAACLSHRSILNNGNSIGDRMLLTENDRVCSPPPLFHCFGCILGYMATATHGSAIIWPAEAFNPLATLEAVREYKATALYGVPTMFVAELDLLAHGAVPRDGFEHLRTGIAAGSSIPAELMRKLHKQLNLTELTICYGMTETSPVSCMTTTDDPIE…
>Alen_Al4_ctg01_-_Alen_Al4_ctg01g1037t1	MFKAQIARQVARAARVQAPRAAFRPAAGSVRPFTSSASRFDKSTEEDHDAGSSSAAPGESGDHEGQFARTREDIVVEYPEEKDLPPSQPVQGRGGFHFKRTLATFSMEGKTAIVTGGARGLGLVMAQALVTSGADVAIVDMNKEEAQRSAEGLVDLFKQENDSGYTKLPKVTAHYCDVSSPDSVNESFAEIVKAHGKVDNLVTSAGFTENFDAISYPHDRIQKLWGVNVDGTYLYAVAVAKHLMERKAPGSVVMIGSMSGSIVNVPQPQAPYNAAKAAVRHLAASLAVEWSHAGIRVNCISPGYMLTALTKKILDDNPELQKQWTSLIPMGKMGRPEDLMGAVTFLSSDASLYVNGADLRVDGAYTCTYPVLDVPVIGGSLPAWWLVPSALLMAAAAPC…
>Alen_Al4_ctg01_-_Alen_Al4_ctg01g1038t1	MFDLYLLTFNCARTLADPQSLAPSFFDALPKGTPVPDLVAISLQEVAPIAYSFLGGSYLKPYFDRVTTTVQLAADLHSQGSQRLEHVATRSLGMTALMIFAKPSFTQRIRWIQSAGAGVGFSNMGNKGAVAMRLGVSCPTSASEETLNLSFAAAHLAPSEKNVDARNKDWENLMRNLVFVNHDDSAYSSIEERPLLSSHKAPSEQNGLFTAGNHVFFFGDLNYRTHDSSPDENAHESFPSMTAAESSPKHYSQLLSRDQLIREKEANRTLHGLEELPITFPPTYKYSTSHSSDDEWQWAKHRFPSWCDRILYLPSHTSKLEPQIYTALPVQSTSDHRPVALSVRVEDKPIPAHGSRVEAPFSINPEWKSRQEAARRWEVMVGAASYLALTKKGNAMLVA…
>Alen_Al4_ctg01_-_Alen_Al4_ctg01g1039t1	MVCSNQYKPQVWSLETHSDWQRWLDKQIDCYDRGLVLILARHAAEQSVSYEGSLPMSIADWLAHIQSETAPNHRMRRANTLAQLCEKQSVSMESSSPAPRRGSPKDLPFSRKTFECISKKLQIHDSIVRAVSRTDIPTFNCEKVEMMERGAFVYSCRTPNSWESDLALSATLVLRKLQTIKGEVAHPLVIPGLLTELELSRHTRLVESSITDVETKILNLNVQAETLSRFQPAEIERRNHAKRGAWLDLTYLRNSLITWTGQLKKMIDHAKALESSCFLESLKTVNTGLPRQLEDMSSRCNDLEPLDSYAALMEDDQRKDTGTKIPTHSIGYSETQCHHNRGRSDIDRHESIYSSTYSLADAETVYVPQMRTVGAKITSRLISICDEYDEKIRDCTMRV…
>Alen_Al4_ctg01_-_Alen_Al4_ctg01g1040t1	MAKTYVVPGRYLDQHSLETYFGKVFGYGKAEVTWVRGKFQCTLPRALTQEEWDSMKSSVEYEHYDDM
>Alen_Al4_ctg01_-_Alen_Al4_ctg01g1041t1	MANKIPEIKISTVASTTTYIEDTIDPPIYEQEESSNYLHLDDRRRGKEYKDLDDLLRDVAIEHEDKDRIDSFWPSKLLATVLTRDRILEELIGLGDALVKQTLSDLADEIFTRHRKIFAILSLLGKGTCIVELMDDNLKDTDLPLVPCDAEKGYRHILARRTLPMVPLQCLQDWPPQLRKSFKEMQHRLSPAFLDLTTDPASGQRVVQHKEFESAVVLPFMECEQKEHGGYGIVSRVKIHSHCHGFCDILRPIETDQYFALKRIIKTPKAKQTNSDIDFWNEVDSLKRFSGFSHEHLVTLLMTWTIRDRYYLLFPLAECDLDRYWESKTIPEDPYNQLLDIETLEWLLEQVHGMTDALDKIHNPSWNTLSPQDQFGRHGDLKPENVLWYRSTAHAKGVF…
>Alen_Al4_ctg01_-_Alen_Al4_ctg01g1042t1	MHFSARTIAGVAAFITITILYTINAVSARDPTSFFFNPRKGYAARYSAIRRQQAEDFLQAYHDAPSHEIVKAGHERNRKLCVGIPSFKREGVRYLRDTVGSLLEGLTPEERQEMYIIVFIPHSNPNVHPEYNEAWLPGLADQVLTYEFGDDQMQHIRNMERQGGLYVEKALFDYRYLLSACTEQFTPYIAMVEDDVVAMDGWYHRTMAAISEAEQQAAERHARADFLYLRLFYTEEFFGWNAEDWRSYLYYSLWVASIPTAILLFVRCARPTTKLSLTITTPRAVAAIYAVLGASILIFFGMGRNTVLPLPTGVAEMSEFGCCAQAFVFPHLKALALIEYFKDRRLGFVDVLTEDYANERRELRYAMTPGVMQHIGKKSSKIDDYGPQSKWGRSVAEKI…
>Alen_Al4_ctg01_-_Alen_Al4_ctg01g1043t1	MPKKHAPAYTQAKPTYVHPSLQSSRASSSSTPSEPQTVNERIQQLRREQTPRATPEQRDELTSVVSSRTVPPDLRRILHIPEVNAPKPKPGLRPRRAIGGARPPPGPAAPTSWLLSSRHAPDYVRKMRSQQSGSERGAPRFCMLSRVTDDEYKRLPPNRSLAHHCLRTFALHWEELSEFEQHYISTIPMALREALLSYLAAWGPKTCLDFRSFRILFQNEEGTGTLGWDEIRFLDFTGLLNEAFTIGDVGKCLKRQTTQLPALEDLQIDDATSIKRRGKAIEVAESWEEEEAAEDPATAQPVLTAALMTPYFTNLSRLSLAHPGAWASWPELLKISPNLNKITHLSLAYWPRPSTTPNAATTSMVSNITTVSLGGSHFYSDLDDDWHEATNILRRLSVN…
>Alen_Al4_ctg01_-_Alen_Al4_ctg01g1044t1	MGLGKQQKRMHTVVELKSEIRVGRERGPSAMMDLREKIVKPVSVESFRMPSLKSASQRQARRRIRGIRTAFDHKAHNKTNVYISSTCIVIYYHVLPTGQNAMEPFDHDWWIRATCRAKYSHLESTSPTDQTVWCTIAITVFTILLELLAHSNCRSVSCGNYDPRISPESRSKEAPIDPFLHSCDDAEPCPSQQVHNSNLNEQNYSTRIRDYLSLPTLTLLRLVASTLLLLAVLAAFCIRILDAITTPTLQEECIPVIHPVPPNWVIIWLLNIFPLISSCSAFVLVVYNTVLTWRAEKLGHEPRQARCVWPLGKLFATILLAITVLTASLMLVARFIMMAVMGLRGRLGKFMGTTWEQSEMATMTGDVEMHDEVRDSGIGNTNMEIDDEDIANGYGQRSS…
>Alen_Al4_ctg01_-_Alen_Al4_ctg01g1045t1	MSENTPLLGQPRDGNRKDDLSWSQRLKHFTWAWFEITMSTGALATLIGQQPYKFPGVDVIGWIFAVLNIILFVVFTGCIIYRFSTGSGRLTRSFHHPHESFFFGAYLVSLALILYCVDLYAVPLCGEWLLTAIMVLYWTYAGIVAVCAVVQYHIIFDRVKLPVTNALPAWILPVYPFLMLGVLGSALLKHQPSNAGLPIFVGSVAFQGLGWIVAYFILTIYVTRLVNSNLPEPSKRPAMYVAVGPAAYTANTFVALGMQAPKHIPKGFLDVDSIPVGDIFKAVGVAVGIFLWLVSFWFSALSTVGFLISLKEAHFTLNWWAFIFPNVGLVIALLQIAEALKLSSVQMICSAATLVLAFAWVFLAIMNIRALARKEVLWPGQDEDMEELDGSPEDMDGET…
>Alen_Al4_ctg01_-_Alen_Al4_ctg01g1046t1	METVTNAYNNVKAALSTAPPSDAYLTWNAPGVEDIKPDEEEIAKKIGATMNKMQQHNFDKYRHCFRATHVKTQGIVKGKLTVLPNLPSHLQQGLFKTAGKSYDVAARYANEPVFLQADQEPGPRGLGLRIFDVEGQRLPSADQDATTQDFFFNNAPMIELTDLPTCLEIMQLREKYFDSPMKLGAATKLRTDPIKQAAPFMLPNTNMISHSFYTQSAFRFGEWYGHIGLFPVLDEMTSRNGKVTSSDSREQLREWLADYFRTHGAKYELKIQLGTDPSHHPTEDGSVVWDEVTAPYQTIATVEFPPQDALTAERRTFWEDRMKLNPWDALVEHQPLGSINRLRKTVYEMSRKKREAVNAVETKRVGSVDEIP
>Alen_Al4_ctg01_-_Alen_Al4_ctg01g1047t1	MEAAHDCEAHFDASLVHESTPVPADSATSAMTTNSLNIPPRMLCTGIMDMPNEILREIFISIDGEFSKTLWSLSLTCKHFRDIVEEHCEPEYNVRGKWIEDPYALMERLRDQPRLTRLIRVLRMDCDSAKHTKHTEEEVQRLVRSLELEPFNAAVLQCWGDALTKDDGGTVWPAILLPQVETIELSMLEDNSETQWHTFIYLLNKVSDQDSFFSQPLDKLRNLALLRHLSHSEPELDAPVLQLPSLKTVRLHNVRFEQHVFNQDLDALRFEGLSFVNELHFQALSQASQARSLEDLQLYSNEPYRSFDGVPIDISVHCHCPPSLKNFQKLKSLALTNMSLVGLSGQRPGHWHQPVEDTLKHLAGMFPPSLEVFTHLLGDWPSCFADAQSKEHQRVYSSE…
>Alen_Al4_ctg01_-_Alen_Al4_ctg01g1048t1	MPAVPELLNAIAQLGNVAPRAFGSDSLLPRGPAIDVAAMARDAPRTAPIAKRQQMVVQQGIIPTYYNLSGPEPGTVVGIVLGSVAGFLLIVWLLYSLTNANKAGTRTAMAGEEEIVVRRSRRNSHGNRSRRNSQMREVSRSPRQSSGRSHIIVEERRQPPPPQQRTRSIIVEERRRVPNDDVVEVIEEHDEYRERRGSRRGGYR
>Alen_Al4_ctg01_-_Alen_Al4_ctg01g1049t1	MADFSPESPLAAQLQQVVQPKLAENGWTTGGDDTTLFEYILLMLANGKDQSQVAAELSNDLLDLGPENTETQEFAQWLFGQIDMLQRQAAGGNAQSAPSADQSMDGGAPSFVPGGQDTDMEGVSEAQEGIPTGPKAMRNGSGAPSARGGPRGGRNMLNQMNRQMNRNDDPLHRVRGGGGVGRNSRDPPRGPRGQNLGRGVEAMANGRGMNSVGNINGAPGPMNGMNGMNMGGMPGMPMPPMGGQNGGMNGGMGLNQQQQLALMQMYEQQAQMMQQIFSGATPTPYVNPNFNNNRGGRGGRGGRGGRGGQHQQGMHPSTKFTKKEGQDDAMTDGPAGENGEGMEVENTRSEPSATMCKFNLRCSNPDCHFVHQSPAAPPGTPVDMESTCEFGAACKNKKC…
>Alen_Al4_ctg01_-_Alen_Al4_ctg01g1050t1	MLVRRHVPRLESTLRARAHAHAHAHAHAHAYAYAHALRPLLASQCTRLRFSSTSAAHPERIAVLGGGIAGLSSAYFASKEFPNSKITVYESGPDTGGWIKSKRVEVPGGHVLFESGPRTLRNATPTAHLMQELGLVDDLIFTKRTEPGAKNRFIYYPDRLNRLPSEAPGIGDVFSLWRSGILDGFLGMVKEPLQPKRSVSLSDETVGSFLERRVDKRIANNIISAVFHGIYAGDIWQLSAKTLLSMAWQLEGKYGTALGGFFRMQSENPTSQQQVIAHPYDVEVARALNSDIDISLDLAQNLKDASMFSFKNGLQTLAKGLQDAMEKTGNIEIKLNSPVASFKMAEGQEQKVEIIAGSDANKTTENYDVVISTLRNASLTPYVTVMTVNLYYDNPNLLP…
>Alen_Al4_ctg01_-_Alen_Al4_ctg01g1051t1	MINPIMLLVSLFFFTTFAIPAATTPVTYNISLDTASLLTLDGVASRLLRLLSLFVHSFFGFLQHNFLMPPWIFFILVVALILRSAPPPILEALGAAFAAPVEALAHIVRRHLGTQLEANATVAALQKRVADFEEGVVLPEKLKRSMIKRETFDLTLASYDDIISGLRETVGKLEGQVKTFEDANIALLRDLDAALYNNSLLENLVDLKRQRAKEESHKLEMARKEQVIIDCITQITELESKLTLWKAQNSHEVHNELVYLQAQREYQAALDAKDMEIHLRDAEISSLTVEVQNKSTAVYQLEQQVVMFNNLKELLLSLVEVGNQRQQIAVIICVAHFLRCGIDVTELGIDPLQLQTYFDWATMAIDGYPSALAPTEGLRLKGVRYPLSRSFVRDGETFT…
>Alen_Al4_ctg01_-_Alen_Al4_ctg01g1052t1	MGFFGKKTTEEVAEKGTPETSTPAETPTRTVSPTRDGAEIEPKGRVPAVAVILGATASIGGFMFGYESGQISGFLQMSDFLERFGENGEFSAIRQGTIVGLLCIGTLFGCLCSAPLADTFGRRLVISGSAFFYIIGVIIEITSERVWVQFAMGRFTAGIGIGALSTVVPMYQSESIPKRIRGATVSSYQLLITLGIWTAYMVNYGTSKDYTNDAQWRIPNGLSALWAIILGSTILLLPESPRYAYRMGRTEEARMNMARLNGIDPHSAFIDNEIREIEEKLQAEAAGGEHPWHEIFTGPRMLYRTLLGMVLQAGQQLTGANYFFYYGTTIFSATGLKNPYVTSIILGTVNVVATIFGLWVVENVGRRTAMMCGAAWMFVCLFIYSFVGHFVANLNAEGE…
>Alen_Al4_ctg01_-_Alen_Al4_ctg01g1053t1	MAVADAAVEGVEGVEGWRGGGGGRGGGYHDDVGESFERNGMMIQRMYDDMYGRMGNRFARGDAITENQLQAQIIALQQTVITVLQDALYNDRQLTRADMAKLVAASNSAREGSLRALQDQQQRLSPHGSIRSPSPQRSIAAPPKRSSTSLVDATEQLYCRYSLDLQYIPNKPLAASMAPGGSCECPACGIRLDVTGEDFWMIGKRTPLTIIEKGYETDIMETREFRLGQRFAVKCHTPDGEYACVICSRNRDVDAICRNVESLVKHVGTYHEVDELEREVDLRETVVTDKRRLSLPAPPREGSPLVRERDVVEMRGYR
>Alen_Al4_ctg01_-_Alen_Al4_ctg01g1054t1	MADIKKEQRGIRIAIDRGGTFTDCVGNPGSGKMEDDVVIKLLSVDPANYDDAPLEGIRRLLERFTGTDIPRGQPLDTTKIESIRMGTTVATNALLERKGEAMAMVVTKGFKDCLEIGNQSRPNIFALDIRKPEVLYKQVVEIDERVTLEDYAEDPERNQTDAKSVEEAGATAELVKGLSGETVRILQRPQEEAIKKQLQKVYDSGIKSIAVCLMHGYTYPHHEALVGKIAKEIGFEHVSLSHALMPMIKLVPRATSACADAYLTPAIRKYIDGFSKGFEGGLGSESVKRDEGAKGARCEFMQSDGGLVDVDIFSGLKAILSGPAGGVVGYALTSYDPETKTPVIGFDMGGTSTDVSRYGAGRYDHVFETTTAGVTIQSPQLDINTVAAGGGSRLFWKNG…
>Alen_Al4_ctg01_-_Alen_Al4_ctg01g1055t1	MKRLRHILVATLFLLGLVYFFAQHGYMSLSTWPGKSRAEMASNTQQTQDLPEPDPSHEGDNFGLDPLLKDAPLSEKLPPTSNIPSKDVPNLPTSGDKPPPTESSGTPPPLIDINFQKDLDIDLPIDLLNSLSGYKPHNYSPDGDRSYTYATFMASRNPSIEDPYYLAIHSLIFRILWSARSKTSKHPFIVFVGDFVSPSQRRLLTGAGAIVRELAPLPWNPTDPGVLNRWKDLFAKLHMWNETEFSRILFLDADAFPVAPIDDMFDKKKVWNCIETKMQLDDFLPDGEPVCEPYIFAGVPADPYSIFDANINVGSMVFTPNSKQHQRLLQNYLKFDKYDVKMAEQAFLNWQFGINSAYPPGMLDRKYGAFFPNEEEHKGLKVVHEKLWAAERGWMKEEW…
>Alen_Al4_ctg01_-_Alen_Al4_ctg01g1056t1	MPTKIEGPLDRLEDTKSYSATWRPVRATRWSLDVVRPEFLALRPGSPKKLLRRTAWLDGLRGFAAFLVYLHHNQLWAHDIHGNSVFENGFGYQGRHYFAALPFVRHFFSGGHFAVAIFFVISGYVLSVKSLGSIQKSQHMVSADSVGSALFRRWLRLYLPVIGFTLSWMMVRHWTDVWVDFGERRSSWSDEFKAWYYSFKNYSFVFLTGENLDFTNNYNGHLWSIPIEFKGSIIVYTVISALSRCTRNARLWCEVALIFYFLYVVDGWYGALFMGGMLLSDLDLLALDNEEPRFLAKLEGFKEFIFFHLFLVAMYLGGVPSCETPGGNRDLLASSPGWKWLYKLRPQAVWDVKWFYLTWAAILTVASIPRLPWLKRFFETRFCQYLGRISFALYLVHGI…
>Alen_Al4_ctg01_-_Alen_Al4_ctg01g1057t1	MRTRPFRPPPLKLYLDTKMPAHSPIASHFRSRFTTQVRRVLPAYLLVIFLILFFTNSYFFTAPIRAAHHFRRERKYQQPLQSGDSLIPRKIWQTWKTGPLAFEQRDSDSAKTWPAKNPSYRYEVLTDDNALAYVEWHYGDHGFNRPDIIALYRELAITIIKADLLRYLVMYAEGGVYADIDVECLRPVERFIPERYNENEIDMIIGVEIDEPAFIEHPILGSKCKSFCQWTFAAKPRLPVMMRLIENIQEWLHDLSREKGVSIAKLELDFNEVISGTGPSAFTKAVLEQMTAQNHGKEVTWDPFHNLAESRLQNGILVLNVEAFAAGQGHSDSGNHDSRGALVKHHYHASGWPSRHPRHSHAMYGEVEHCNWNPQCVAEWDKNVAEWETLDKEEQEKRL…
>Alen_Al4_ctg01_-_Alen_Al4_ctg01g1058t1	MTGAIQAVVTNIRASNLLSVRGVGILLSVFLAFRIVQGIVRVIYNVYFHPLSKYPGPKLWAAFDVARTIGRMGGYIDFQIAEQHREHGEVVRIGVNELSFISPSAWKDIYGHGHAELQKYFPPNAVNPNQIIAANSSNHFRMRRAMLPAFSEKALAQQERLIRVYIDLLVQRLSDCAQDGQPADMARWYNLTTFDLIADLCFGKSLGGLETGKSNAWIEKIEKMLEIMPMLMLVTSFPFLMTVFNLLFGKRMQQSRKEHQDYAASLAMTRIQGKEQADRGDFMDFILRSRGEAHQLTDEELVHNADLFMVAGSETTATVLLGVTYYLLKTPHAYKKVTNEVRAAFQRAEDITFKEANARLPYMLACLNEAMRIFPSIPFVLLRVTNDGPPTPVAGHSIP…
>Alen_Al4_ctg01_-_Alen_Al4_ctg01g1059t1	MQTLENGAVGVLLSAALATVTAYTVYYVIYNVYFHPLAGFPGPPLAGATTYWKAYVECIANRSFCHELVNLHARYGDVVRVGPNELHFANPKAYNDIYNNKNRWDKEARLYKSFNEDRSSFGFLTYAEAKNRKDVLNRSFSQAAINGAEDLVLQQTKALCAAFAKQSKASKSADLYFAYRCMSMDIICTFCFGKSIHAVDAPDFEAPIVVAMDASLPVFIRFKYSDMYKNMILKCPPKLSRIISPSTAGLVDLQQLLLQQISDLTEDPEKLKQLPHNMTIYHRLMDVEAYRNKTIPSAGSLYEEAQALMFGGADTVGNTLMVGTHYLLQHPATLQKLKEELLAAWPTLEIEPKLRDFEELPYLNAVIKESLRMSSGVVSGLLRVVPLAGAVINGVTVPP…
[truncated: 10,579 more rows]

## Sheet: CAZymes dbCAN HMMdb release 8.0
Gene ID	HMMER	Hotpep	DIAMOND	Signalp	# of Tools
[truncated: 710 more rows]

## Sheet: Secondary metabolites antiSMASH
Region	Contig	start	end	Length (bp)	Type	No. of genes in cluster	Homologous cluster
[truncated: 31 more rows]

[truncated: 2 more sheets: Effector candidates, Repeat and TE sequences]
